# Supplementary material for: Copy number variations in East-Asian population and their evolutionary and functional implications
Source: PubMed Central journal article supplement — Hum Mol Genet. 2009 Dec 21;19(6):1001–8. doi: 10.1093/hmg/ddp564 (PMC2830825; doi:10.1093/hmg/ddp564), 2009-12-21
Supplement: ddp564_1.pdf [file ddp564_1.pdf]

## Supplementary Materials

Supplementary Table S1. 4,003 CNVRs identified in Koreans.

| CNVR ID | Chr | Locus   | Start (bp) | End (bp) | CNVR size (bp) | CNVR freq (%) | DGV match (Y/N) | CNVR status* | OMIM gene ID** | OMIM Morbid Map ID*** | Phenotype***                                               |
|---------|-----|---------|------------|----------|----------------|---------------|-----------------|--------------|----------------|-----------------------|------------------------------------------------------------|
| 1       | 1   | 1p36.33 | 5129       | 94845    | 89717          | 3.94          | Y               | C            |                |                       |                                                            |
| 2       | 1   | 1p36.33 | 711270     | 808556   | 97287          | 0.06          | Y               | G            |                |                       |                                                            |
| 3       | 1   | 1p36.33 | 1381435    | 1454183  | 72749          | 0.06          | Y               | G            | 612317         |                       |                                                            |
| 4       | 1   | 1p36.33 | 1618027    | 1670811  | 52785          | 0.34          | Y               | L            | 176873         |                       |                                                            |
| 5       | 1   | 1p36.33 | 1819067    | 1869815  | 50749          | 0.48          | Y               | L            | 610171         |                       |                                                            |
| 6       | 1   | 1p36.32 | 2447463    | 2449628  | 2166           | 0.06          | Y               | C            | 606162         |                       |                                                            |
| 7       | 1   | 1p36.32 | 2459035    | 2475181  | 16147          | 0.22          | Y               | L            |                |                       |                                                            |
| 8       | 1   | 1p36.32 | 3130438    | 3142828  | 12391          | 0.31          | Y               | L            | 605557         |                       |                                                            |
| 9       | 1   | 1p36.32 | 4032561    | 4045475  | 12915          | 0.06          | N               | L            |                |                       |                                                            |
| 10      | 1   | 1p36.32 | 4162814    | 4199587  | 36774          | 0.06          | N               | L            |                |                       |                                                            |
| 11      | 1   | 1p36.32 | 5021315    | 5071724  | 50410          | 0.08          | Y               | L            |                |                       |                                                            |
| 12      | 1   | 1p36.31 | 5414088    | 5443191  | 29104          | 0.06          | Y               | L            |                |                       |                                                            |
| 13      | 1   | 1p36.31 | 5705308    | 5718214  | 12907          | 0.17          | N               | L            |                |                       |                                                            |
| 14      | 1   | 1p36.22 | 10631379   | 10638758 | 7380           | 0.06          | Y               | G            | 609895         |                       |                                                            |
| 15      | 1   | 1p36.21 | 12775459   | 12936641 | 161183         | 1.90          | Y               | C            |                |                       |                                                            |
| 16      | 1   | 1p36.21 | 14237550   | 14242955 | 5406           | 0.06          | Y               | L            |                |                       |                                                            |
| 17      | 1   | 1p36.13 | 16219857   | 16231574 | 11718          | 0.08          | Y               | L            | 602024         | 602024                | Bartter syndrome, type 4, digenic, 602522 (3)              |
| 18      | 1   | 1p36.13 | 16891258   | 16921744 | 30487          | 0.50          | Y               | C            |                |                       |                                                            |
| 19      | 1   | 1p36.13 | 16949054   | 16987221 | 38168          | 0.06          | Y               | L            |                |                       |                                                            |
| 20      | 1   | 1p36.13 | 17067742   | 17139108 | 71367          | 0.78          | Y               | C            |                |                       |                                                            |
| 21      | 1   | 1p36.13 | 18346116   | 18353084 | 6969           | 0.45          | Y               | L            |                |                       |                                                            |
| 22      | 1   | 1p36.12 | 22182476   | 22210902 | 28427          | 1.54          | Y               | L            |                |                       |                                                            |
| 23      | 1   | 1p36.11 | 25465558   | 25535813 | 70256          | 1.26          | Y               | L            | 111680         | 111680                | [Rh-negative blood type] (3)                               |
| 24      | 1   | 1p34.3  | 34872390   | 34886784 | 14395          | 1.15          | Y               | C            |                |                       |                                                            |
| 25      | 1   | 1p34.3  | 36711189   | 36744474 | 33286          | 2.40          | N               | L            | 138971         | 138971                | Neutrophilia, hereditary, 162830 (3)                       |
| 26      | 1   | 1p34.3  | 37291746   | 37316810 | 25065          | 0.06          | N               | L            |                |                       |                                                            |
| 27      | 1   | 1p34.2  | 43310568   | 43321994 | 11427          | 0.11          | N               | L            |                |                       |                                                            |
| 28      | 1   | 1p33    | 49265079   | 49302552 | 37474          | 0.06          | N               | L            |                |                       |                                                            |
| 29      | 1   | 1p33    | 49620448   | 49830961 | 210514         | 0.06          | Y               | L            |                |                       |                                                            |
| 30      | 1   | 1p33    | 50353410   | 50375082 | 21673          | 0.14          | N               | L            | 168360         | 168360                | Neuropathy, paraneoplastic sensory (1)                     |
| 31      | 1   | 1p32.3  | 53261884   | 53283563 | 21680          | 0.08          | Y               | L            | 184755         | 184755                | Leukoencephalopathy with dystonia and motor neuropathy (3) |
| 32      | 1   | 1p32.3  | 55749294   | 55776510 | 27217          | 0.06          | N               | L            |                |                       |                                                            |
| 33      | 1   | 1p32.2  | 56291522   | 56309315 | 17794          | 0.08          | N               | L            |                |                       |                                                            |
| 34      | 1   | 1p32.2  | 56448662   | 56520770 | 72109          | 0.17          | Y               | L            |                |                       |                                                            |
| 35      | 1   | 1p32.2  | 56759618   | 56783299 | 23682          | 0.06          | N               | L            | 607125         |                       |                                                            |
| 36      | 1   | 1p32.2  | 56957878   | 57013822 | 55945          | 1.03          | N               | L            |                |                       |                                                            |
| 37      | 1   | 1p32.2  | 57114437   | 57131381 | 16945          | 0.11          | N               | L            | 120950         | 120950                | C8 deficiency, type I (2)                                  |
| 38      | 1   | 1p32.2  | 57212846   | 57218906 | 6061           | 0.14          | N               | L            |                |                       |                                                            |
| 39      | 1   | 1p32.2  | 57999110   | 58011280 | 12171          | 0.36          | N               | L            | 603448         |                       |                                                            |
| 40      | 1   | 1p32.2  | 58187358   | 58245134 | 57777          | 0.14          | N               | C            | 603448         |                       |                                                            |
| 41      | 1   | 1p32.2  | 58599634   | 58619524 | 19891          | 0.08          | N               | L            |                |                       |                                                            |
| 42      | 1   | 1p32.1  | 60398756   | 60440863 | 42108          | 0.22          | N               | L            |                |                       |                                                            |
| 43      | 1   | 1p32.1  | 60741189   | 60765730 | 24542          | 0.06          | N               | L            |                |                       |                                                            |
| 44      | 1   | 1p31.3  | 62416725   | 62434380 | 17656          | 0.14          | Y               | L            |                |                       |                                                            |
| 45      | 1   | 1p31.3  | 62533985   | 62538049 | 4065           | 0.06          | N               | L            |                |                       |                                                            |
| 46      | 1   | 1p31.3  | 63339503   | 63354702 | 15200          | 0.11          | N               | L            |                |                       |                                                            |
| 47      | 1   | 1p31.3  | 64115114   | 64224266 | 109153         | 0.20          | N               | L            | 602336         |                       |                                                            |
| 48      | 1   | 1p31.3  | 66202492   | 66233101 | 30610          | 0.14          | N               | L            | 600127         |                       |                                                            |
| 49      | 1   | 1p31.3  | 66277442   | 66291285 | 13844          | 0.20          | N               | L            | 600127         |                       |                                                            |
| 50      | 1   | 1p31.3  | 66305316   | 66357045 | 51730          | 0.95          | N               | L            | 600127         |                       |                                                            |
| 51      | 1   | 1p31.3  | 66443356   | 66445120 | 1765           | 0.06          | N               | L            | 600127         |                       |                                                            |
| 52      | 1   | 1p31.3  | 66522367   | 66545614 | 23248          | 0.08          | N               | L            | 600127         |                       |                                                            |
| 53      | 1   | 1p31.3  | 66726070   | 66736219 | 10150          | 0.14          | N               | L            |                |                       |                                                            |
| 54      | 1   | 1p31.3  | 66779947   | 66810486 | 30540          | 0.56          | N               | L            | 611540         |                       |                                                            |
| 55      | 1   | 1p31.3  | 66825324   | 66835618 | 10295          | 0.08          | N               | G            | 611540         |                       |                                                            |

|     |   |                   |           |           |         |       |   |   |        |        |                                     |
|-----|---|-------------------|-----------|-----------|---------|-------|---|---|--------|--------|-------------------------------------|
| 56  | 1 | 1p31.2            | 68758980  | 68809932  | 50953   | 0.20  | N | L |        |        |                                     |
| 57  | 1 | 1p31.1            | 69652390  | 69675629  | 23240   | 1.65  | N | L |        |        |                                     |
| 58  | 1 | 1p31.1            | 70196055  | 70232826  | 36772   | 0.34  | N | L |        |        |                                     |
| 59  | 1 | 1p31.1            | 70696132  | 70717108  | 20977   | 0.53  | N | L |        |        |                                     |
| 60  | 1 | 1p31.1            | 71476294  | 71505956  | 29663   | 0.11  | N | L |        |        |                                     |
| 61  | 1 | 1p31.1            | 71708912  | 71730504  | 21593   | 0.06  | Y | L |        |        |                                     |
| 62  | 1 | 1p31.1            | 71758545  | 71804154  | 45610   | 4.70  | N | L |        |        |                                     |
| 63  | 1 | 1p31.1            | 72280502  | 72302454  | 21953   | 0.20  | N | L |        |        |                                     |
| 64  | 1 | 1p31.1            | 72347927  | 72361373  | 13447   | 0.06  | N | L |        |        |                                     |
| 65  | 1 | 1p31.1            | 72411622  | 72462897  | 51276   | 0.22  | Y | L |        |        |                                     |
| 66  | 1 | 1p31.1            | 72541070  | 72590991  | 49922   | 14.31 | Y | G |        |        |                                     |
| 67  | 1 | 1p31.1            | 72931014  | 72981597  | 50584   | 0.64  | Y | L |        |        |                                     |
| 68  | 1 | 1p31.1            | 73156994  | 73209258  | 52265   | 0.25  | N | L |        |        |                                     |
| 69  | 1 | 1p31.1            | 73685387  | 73712946  | 27560   | 0.50  | N | L |        |        |                                     |
| 70  | 1 | 1p31.1            | 73915377  | 73947239  | 31863   | 0.08  | N | L |        |        |                                     |
| 71  | 1 | 1p31.1            | 73973812  | 73997138  | 23327   | 0.08  | N | L |        |        |                                     |
| 72  | 1 | 1p31.1            | 74129950  | 74235478  | 105529  | 3.88  | N | L |        |        |                                     |
| 73  | 1 | 1p31.1            | 74309773  | 74377105  | 67333   | 0.59  | N | L |        |        |                                     |
| 74  | 1 | 1p31.1            | 74649066  | 74677888  | 28823   | 0.11  | N | L | 603609 |        |                                     |
| 75  | 1 | 1p31.1            | 75005445  | 75095222  | 89778   | 2.77  | N | L |        |        |                                     |
| 76  | 1 | 1p31.1            | 75296934  | 75336210  | 39277   | 1.03  | N | L |        |        |                                     |
| 77  | 1 | 1p31.1            | 76497240  | 76527545  | 30306   | 0.25  | N | L | 610133 |        |                                     |
| 78  | 1 | 1p31.1            | 76700712  | 76774365  | 73654   | 0.22  | Y | L | 610133 |        |                                     |
| 79  | 1 | 1p31.1            | 76863681  | 76881390  | 17710   | 0.45  | N | L | 610133 |        |                                     |
| 80  | 1 | 1p31.1            | 77028924  | 77069793  | 40870   | 1.06  | Y | L |        |        |                                     |
| 81  | 1 | 1p31.1            | 77154507  | 77225684  | 71178   | 2.15  | N | L | 610134 |        |                                     |
| 82  | 1 | 1p31.1            | 78562162  | 78588387  | 26226   | 0.06  | N | L |        |        |                                     |
| 83  | 1 | 1p31.1            | 78759542  | 78785633  | 26092   | 0.17  | Y | L | 600563 |        |                                     |
| 84  | 1 | 1p31.1            | 78793379  | 78877817  | 84439   | 0.17  | Y | L |        |        |                                     |
| 85  | 1 | 1p31.1            | 79216039  | 79229484  | 13446   | 0.06  | N | L |        |        |                                     |
| 86  | 1 | 1p31.1            | 79386522  | 79460017  | 73496   | 0.56  | Y | L |        |        |                                     |
| 87  | 1 | 1p31.1            | 80255994  | 80287829  | 31836   | 0.06  | Y | L |        |        |                                     |
| 88  | 1 | 1p31.1            | 80472343  | 80544659  | 72317   | 1.23  | Y | L |        |        |                                     |
| 89  | 1 | 1p31.1            | 80613592  | 80631097  | 17506   | 0.25  | Y | L |        |        |                                     |
| 90  | 1 | 1p31.1            | 80686833  | 80700921  | 14089   | 0.11  | Y | L |        |        |                                     |
| 91  | 1 | 1p31.1            | 80757260  | 80811644  | 54385   | 0.14  | Y | L |        |        |                                     |
| 92  | 1 | 1p31.1            | 80983155  | 81031531  | 48377   | 0.36  | Y | L |        |        |                                     |
| 93  | 1 | 1p31.1            | 81205529  | 81242674  | 37146   | 0.11  | Y | L |        |        |                                     |
| 94  | 1 | 1p31.1            | 81852766  | 81868815  | 16050   | 0.06  | Y | L |        |        |                                     |
| 95  | 1 | 1p31.1            | 82406946  | 82462594  | 55649   | 1.62  | N | C |        |        |                                     |
| 96  | 1 | 1p31.1            | 82485542  | 82510316  | 24775   | 0.11  | Y | L |        |        |                                     |
| 97  | 1 | 1p31.1            | 82680151  | 82737485  | 57335   | 0.36  | N | L |        |        |                                     |
| 98  | 1 | 1p31.1            | 82825222  | 82908723  | 83502   | 0.25  | Y | L |        |        |                                     |
| 99  | 1 | 1p31.1            | 82949953  | 83007521  | 57569   | 3.16  | Y | L |        |        |                                     |
| 100 | 1 | 1p31.1            | 83063337  | 83077580  | 14244   | 0.28  | Y | L |        |        |                                     |
| 101 | 1 | 1p31.1            | 83138642  | 83179839  | 41198   | 0.39  | Y | L |        |        |                                     |
| 102 | 1 | 1p31.1            | 83305193  | 83336264  | 31072   | 2.18  | Y | L |        |        |                                     |
| 103 | 1 | 1p31.1            | 83710817  | 83765549  | 54733   | 0.45  | Y | L |        |        |                                     |
| 104 | 1 | 1p31.1            | 84391903  | 84435529  | 43627   | 0.64  | N | L | 176892 |        |                                     |
| 105 | 1 | 1p22.3            | 86050077  | 86600221  | 550145  | 0.20  | Y | L | 610025 |        |                                     |
| 106 | 1 | 1p22.2            | 88215440  | 88256151  | 40712   | 0.45  | N | L |        |        |                                     |
| 107 | 1 | 1p22.2            | 88487955  | 88509910  | 21956   | 0.20  | N | L |        |        |                                     |
| 108 | 1 | 1p22.2            | 88638301  | 88660149  | 21849   | 0.92  | N | L |        |        |                                     |
| 109 | 1 | 1p22.2            | 88746060  | 88791422  | 45363   | 1.29  | N | L |        |        |                                     |
| 110 | 1 | 1p22.2            | 90581530  | 90723104  | 141575  | 1.23  | Y | L |        |        |                                     |
| 111 | 1 | 1p22.2            | 91367078  | 91375139  | 8062    | 0.08  | N | L |        |        |                                     |
| 112 | 1 | 1p21.3            | 95815598  | 95837009  | 21412   | 0.22  | N | L |        |        |                                     |
| 113 | 1 | 1p21.3            | 96407582  | 96476681  | 69100   | 0.06  | N | L |        |        |                                     |
| 114 | 1 | 1p21.3            | 96553336  | 96578586  | 25251   | 0.14  | N | L |        |        |                                     |
| 115 | 1 | 1p21.3            | 97367582  | 97424588  | 57007   | 0.11  | N | L | 612779 | 612779 | 5-fluorouracil toxicity, 274270 (3) |
| 116 | 1 | 1p21.3            | 97531177  | 97570662  | 39486   | 0.22  | N | L | 612779 | 612779 | 5-fluorouracil toxicity, 274270 (3) |
| 117 | 1 | 1p21.3            | 97730630  | 97752979  | 22350   | 0.08  | Y | L | 612779 | 612779 | 5-fluorouracil toxicity, 274270 (3) |
| 118 | 1 | 1p21.3            | 98094967  | 98151866  | 56900   | 2.32  | N | L | 612779 | 612779 | 5-fluorouracil toxicity, 274270 (3) |
| 119 | 1 | 1p21.3-<br>1p21.1 | 98318836  | 103839847 | 5521012 | 6.68  | Y | L | 607813 |        |                                     |
| 120 | 1 | 1p21.1            | 103899996 | 104781067 | 881072  | 1.09  | Y | C | 104660 |        |                                     |
| 121 | 1 | 1p21.1            | 104857714 | 104939500 | 81787   | 0.25  | N | L |        |        |                                     |
| 122 | 1 | 1p21.1            | 104942081 | 104968807 | 26727   | 0.06  | N | C |        |        |                                     |
| 123 | 1 | 1p21.1            | 105319659 | 105354459 | 34801   | 0.31  | N | L |        |        |                                     |
| 124 | 1 | 1p21.1            | 105381193 | 105428341 | 47149   | 0.06  | N | L |        |        |                                     |

|     |   |                   |           |           |         |       |   |   |        |        |                                                                              |
|-----|---|-------------------|-----------|-----------|---------|-------|---|---|--------|--------|------------------------------------------------------------------------------|
| 125 | 1 | 1p21.1            | 105443094 | 105518422 | 75329   | 0.06  | N | L |        |        |                                                                              |
| 126 | 1 | 1p21.1            | 105681398 | 105695249 | 13852   | 0.11  | Y | L |        |        |                                                                              |
| 127 | 1 | 1p21.1            | 105748367 | 105764981 | 16615   | 0.08  | Y | C |        |        |                                                                              |
| 128 | 1 | 1p21.1            | 105798734 | 105830601 | 31868   | 0.08  | Y | C |        |        |                                                                              |
| 129 | 1 | 1p21.1            | 105845383 | 105893637 | 48255   | 0.06  | Y | L |        |        |                                                                              |
| 130 | 1 | 1p21.1            | 105984227 | 106028851 | 44625   | 0.11  | Y | L |        |        |                                                                              |
| 131 | 1 | 1p21.1            | 106143542 | 106196701 | 53160   | 0.73  | Y | L |        |        |                                                                              |
| 132 | 1 | 1p21.1            | 106498070 | 106632392 | 134323  | 3.47  | Y | L |        |        |                                                                              |
| 133 | 1 | 1p21.1            | 106900071 | 106952094 | 52024   | 0.48  | N | L |        |        |                                                                              |
| 134 | 1 | 1p13.3            | 107032253 | 107057422 | 25170   | 0.45  | N | L |        |        |                                                                              |
| 135 | 1 | 1p13.3            | 107096603 | 107105022 | 8420    | 0.08  | N | L |        |        |                                                                              |
| 136 | 1 | 1p13.3            | 107272267 | 107282609 | 10343   | 0.14  | N | L |        |        |                                                                              |
| 137 | 1 | 1p13.3            | 107516001 | 107556579 | 40579   | 0.28  | Y | L | 608818 |        |                                                                              |
| 138 | 1 | 1p13.3            | 107731728 | 107784870 | 53143   | 0.59  | N | L | 608818 |        |                                                                              |
| 139 | 1 | 1p13.3            | 109128305 | 109145364 | 17060   | 0.56  | Y | L | 608339 |        |                                                                              |
| 140 | 1 | 1p13.3            | 109971754 | 110053346 | 81593   | 48.63 | Y | C | 102771 |        |                                                                              |
| 141 | 1 | 1p13.3            | 111172260 | 111189224 | 16965   | 0.14  | Y | L |        |        |                                                                              |
| 142 | 1 | 1p13.3            | 111593026 | 111596256 | 3231    | 0.14  | Y | L |        |        |                                                                              |
| 143 | 1 | 1p13.2            | 111629987 | 111636507 | 6521    | 1.01  | Y | L | 606080 |        |                                                                              |
| 144 | 1 | 1p13.2            | 111971020 | 112002851 | 31832   | 0.06  | N | L | 179520 |        |                                                                              |
| 145 | 1 | 1p13.2            | 112493722 | 112507560 | 13839   | 16.77 | Y | C |        |        |                                                                              |
| 146 | 1 | 1p13.2            | 115300524 | 115346271 | 45748   | 0.36  | Y | L | 602162 |        |                                                                              |
| 147 | 1 | 1p13.2            | 115425384 | 115429753 | 4370    | 0.11  | Y | L |        |        |                                                                              |
| 148 | 1 | 1p13.2            | 115488789 | 115511737 | 22949   | 4.56  | Y | L |        |        |                                                                              |
| 149 | 1 | 1p12              | 117803369 | 117868829 | 65461   | 1.79  | Y | L | 604345 |        |                                                                              |
| 150 | 1 | 1p12              | 118778611 | 118886605 | 107995  | 0.67  | N | C |        |        |                                                                              |
| 151 | 1 | 1p12              | 119130070 | 119150231 | 20162   | 0.14  | Y | L |        |        |                                                                              |
| 152 | 1 | 1p12              | 119900163 | 119946728 | 46566   | 0.08  | Y | C |        |        |                                                                              |
| 153 | 1 | 1p12              | 119982800 | 119996565 | 13766   | 0.17  | Y | G |        |        |                                                                              |
| 154 | 1 | 1p11.2-<br>1p11.1 | 121023839 | 121184502 | 160664  | 0.75  | Y | L |        |        |                                                                              |
| 155 | 1 | 1q21.1            | 144078052 | 144090384 | 12333   | 0.06  | Y | L |        |        |                                                                              |
| 156 | 1 | 1q21.1            | 144374023 | 144481996 | 107974  | 0.08  | Y | L | 604463 |        |                                                                              |
| 157 | 1 | 1q21.1            | 145347239 | 145390602 | 43364   | 0.64  | Y | L |        |        |                                                                              |
| 158 | 1 | 1q21.1            | 145705110 | 145713527 | 8418    | 0.06  | Y | L |        |        |                                                                              |
| 159 | 1 | 1q21.1            | 146793112 | 147962942 | 1169831 | 17.66 | Y | C | 610414 |        |                                                                              |
| 160 | 1 | 1q21.2-<br>1q21.3 | 149596424 | 149607806 | 11383   | 0.08  | Y | C | 604188 |        |                                                                              |
| 161 | 1 | 1q21.3            | 150558938 | 150579221 | 20284   | 0.11  | N | L | 605803 |        |                                                                              |
| 162 | 1 | 1q21.3            | 150794218 | 150857189 | 62972   | 46.23 | Y | C | 612617 |        |                                                                              |
| 163 | 1 | 1q21.3            | 150863585 | 150872645 | 9061    | 0.06  | Y | L |        |        |                                                                              |
| 164 | 1 | 1q21.3            | 151026398 | 151035065 | 8668    | 0.73  | Y | L | 612607 |        |                                                                              |
| 165 | 1 | 1q21.3            | 152553093 | 152560366 | 7274    | 0.06  | N | G | 606578 |        |                                                                              |
| 166 | 1 | 1q23.1            | 155908062 | 155938928 | 30867   | 0.22  | N | L | 606510 |        |                                                                              |
| 167 | 1 | 1q23.1            | 156706936 | 156728187 | 21252   | 0.22  | N | L |        |        |                                                                              |
| 168 | 1 | 1q23.1            | 156940959 | 156979251 | 38293   | 0.75  | N | L |        |        |                                                                              |
| 169 | 1 | 1q23.3            | 159234848 | 159267088 | 32241   | 0.06  | N | L | 605721 |        |                                                                              |
| 170 | 1 | 1q23.3            | 159763513 | 159905182 | 141670  | 0.36  | Y | C | 146740 | 146740 | Neutropenia,<br>alloimmune<br>neonatal (3)                                   |
| 171 | 1 | 1q23.3            | 160102111 | 160118977 | 16867   | 0.08  | Y | L | 605537 |        |                                                                              |
| 172 | 1 | 1q23.3            | 160897582 | 160912777 | 15196   | 0.06  | Y | L | 191311 | 191311 | Spondylometaphiph<br>yseal dysplasia,<br>short limb-hand<br>type, 271665 (3) |
| 173 | 1 | 1q23.3            | 161069239 | 161086621 | 17383   | 0.06  | Y | L |        |        |                                                                              |
| 174 | 1 | 1q23.3            | 161325080 | 161360006 | 34927   | 2.24  | N | L |        |        |                                                                              |
| 175 | 1 | 1q23.3            | 162009464 | 162082267 | 72804   | 6.74  | N | L |        |        |                                                                              |
| 176 | 1 | 1q23.3            | 162408299 | 162426127 | 17829   | 0.06  | N | L |        |        |                                                                              |
| 177 | 1 | 1q23.3            | 162531148 | 162544447 | 13300   | 0.06  | Y | L |        |        |                                                                              |
| 178 | 1 | 1q24.1            | 164806611 | 164878837 | 72227   | 0.50  | Y | L |        |        |                                                                              |
| 179 | 1 | 1q24.1            | 164923228 | 164946865 | 23638   | 0.17  | N | L |        |        |                                                                              |
| 180 | 1 | 1q24.2            | 167179224 | 167209840 | 30617   | 0.20  | N | L |        |        |                                                                              |
| 181 | 1 | 1q24.2            | 167500647 | 167521791 | 21145   | 1.87  | Y | L |        |        |                                                                              |
| 182 | 1 | 1q24.2            | 167796379 | 167815516 | 19138   | 0.11  | N | L | 612309 | 612309 | Factor V deficiency,<br>227400 (3)                                           |
| 183 | 1 | 1q24.2            | 168674923 | 168719770 | 44848   | 0.06  | Y | L |        |        |                                                                              |
| 184 | 1 | 1q24.3            | 169142151 | 169153462 | 11312   | 0.14  | N | L |        |        |                                                                              |
| 185 | 1 | 1q24.3            | 169185580 | 169232991 | 47412   | 0.11  | N | L |        |        |                                                                              |
| 186 | 1 | 1q24.3            | 169349798 | 169383384 | 33587   | 0.20  | N | L | 602079 |        |                                                                              |
| 187 | 1 | 1q24.3            | 170056994 | 170069162 | 12169   | 1.45  | N | L |        |        |                                                                              |
| 188 | 1 | 1q24.3            | 170135865 | 170151609 | 15745   | 0.06  | N | L | 611445 |        |                                                                              |
| 189 | 1 | 1q24.3            | 170351854 | 170518144 | 166291  | 3.80  | N | L | 611445 |        |                                                                              |
| 190 | 1 | 1q24.3            | 170590455 | 170621755 | 31301   | 0.28  | N | L | 611445 |        |                                                                              |

|     |   |        |           |           |        |      |   |   |        |        |                                                                      |
|-----|---|--------|-----------|-----------|--------|------|---|---|--------|--------|----------------------------------------------------------------------|
| 191 | 1 | 1q24.3 | 170995569 | 171015451 | 19883  | 0.06 | N | L |        |        |                                                                      |
| 192 | 1 | 1q25.1 | 173294436 | 173310578 | 16143  | 0.06 | N | G |        |        |                                                                      |
| 193 | 1 | 1q25.1 | 173310590 | 173336401 | 25812  | 0.06 | Y | L |        |        |                                                                      |
| 194 | 1 | 1q25.1 | 173859549 | 173876093 | 16545  | 0.06 | Y | L | 601995 |        |                                                                      |
| 195 | 1 | 1q25.2 | 174885893 | 174918309 | 32417  | 0.06 | N | L |        |        |                                                                      |
| 196 | 1 | 1q25.2 | 175709889 | 175828218 | 118330 | 1.70 | N | L |        |        |                                                                      |
| 197 | 1 | 1q25.3 | 180709667 | 180878229 | 168563 | 0.56 | N | L | 611012 |        |                                                                      |
| 198 | 1 | 1q25.3 | 183906810 | 183928029 | 21220  | 0.08 | N | L |        |        |                                                                      |
| 199 | 1 | 1q31.1 | 184262936 | 184328667 | 65732  | 0.14 | N | L | 608548 | 608548 | {Macular degeneration, age-related, 1}, 603075 (3)                   |
| 200 | 1 | 1q31.1 | 184463975 | 184468206 | 4232   | 0.11 | N | G |        |        |                                                                      |
| 201 | 1 | 1q31.1 | 184470643 | 184472490 | 1848   | 0.59 | N | L |        |        |                                                                      |
| 202 | 1 | 1q31.1 | 185422992 | 185486027 | 63036  | 0.06 | Y | L |        |        |                                                                      |
| 203 | 1 | 1q31.1 | 185696376 | 185759476 | 63101  | 0.31 | Y | L |        |        |                                                                      |
| 204 | 1 | 1q31.1 | 186119332 | 186142994 | 23663  | 0.11 | Y | L |        |        |                                                                      |
| 205 | 1 | 1q31.1 | 186395739 | 186537270 | 141532 | 0.59 | N | L |        |        |                                                                      |
| 206 | 1 | 1q31.1 | 186632905 | 186649670 | 16766  | 0.17 | N | L |        |        |                                                                      |
| 207 | 1 | 1q31.1 | 186822910 | 186898643 | 75734  | 0.39 | Y | L |        |        |                                                                      |
| 208 | 1 | 1q31.1 | 186939204 | 186968610 | 29407  | 0.08 | N | L |        |        |                                                                      |
| 209 | 1 | 1q31.1 | 187172961 | 187994978 | 822018 | 4.08 | Y | L |        |        |                                                                      |
| 210 | 1 | 1q31.1 | 188089235 | 188103729 | 14495  | 0.20 | Y | L |        |        |                                                                      |
| 211 | 1 | 1q31.1 | 188137434 | 188261835 | 124402 | 0.22 | Y | C |        |        |                                                                      |
| 212 | 1 | 1q31.1 | 188276324 | 188292503 | 16180  | 0.08 | Y | L |        |        |                                                                      |
| 213 | 1 | 1q31.1 | 188408514 | 188454699 | 46186  | 0.84 | N | L |        |        |                                                                      |
| 214 | 1 | 1q31.1 | 188505096 | 188602913 | 97818  | 1.20 | N | L |        |        |                                                                      |
| 215 | 1 | 1q31.1 | 188950952 | 188982449 | 31498  | 0.14 | Y | L |        |        |                                                                      |
| 216 | 1 | 1q31.2 | 189137898 | 189155617 | 17720  | 0.11 | N | L |        |        |                                                                      |
| 217 | 1 | 1q31.2 | 189272340 | 189325007 | 52668  | 5.76 | N | L |        |        |                                                                      |
| 218 | 1 | 1q31.2 | 189338095 | 189398559 | 60465  | 0.50 | N | L |        |        |                                                                      |
| 219 | 1 | 1q31.2 | 189632233 | 189667983 | 35751  | 0.22 | Y | L |        |        |                                                                      |
| 220 | 1 | 1q31.2 | 190050798 | 190089569 | 38772  | 0.08 | Y | L |        |        |                                                                      |
| 221 | 1 | 1q31.2 | 190303355 | 190326009 | 22655  | 0.95 | N | L |        |        |                                                                      |
| 222 | 1 | 1q31.2 | 190412300 | 190432623 | 20324  | 0.31 | N | L | 607192 |        |                                                                      |
| 223 | 1 | 1q31.2 | 190593918 | 190620563 | 26646  | 0.11 | N | L | 612407 |        |                                                                      |
| 224 | 1 | 1q31.2 | 190629297 | 190656662 | 27366  | 0.25 | N | L |        |        |                                                                      |
| 225 | 1 | 1q31.2 | 191684778 | 191693617 | 8840   | 0.08 | N | L |        |        |                                                                      |
| 226 | 1 | 1q31.2 | 191906260 | 191939281 | 33022  | 0.67 | Y | L |        |        |                                                                      |
| 227 | 1 | 1q31.3 | 192288485 | 192293566 | 5082   | 0.08 | N | L |        |        |                                                                      |
| 228 | 1 | 1q31.3 | 192333142 | 192351528 | 18387  | 0.14 | N | L |        |        |                                                                      |
| 229 | 1 | 1q31.3 | 192686859 | 192743596 | 56738  | 5.90 | Y | L |        |        |                                                                      |
| 230 | 1 | 1q31.3 | 193269460 | 193295393 | 25934  | 1.65 | Y | L |        |        |                                                                      |
| 231 | 1 | 1q31.3 | 193307526 | 193321156 | 13631  | 0.67 | N | L |        |        |                                                                      |
| 232 | 1 | 1q31.3 | 193608350 | 193645138 | 36789  | 0.06 | Y | L |        |        |                                                                      |
| 233 | 1 | 1q31.3 | 193720366 | 193990354 | 269989 | 0.08 | Y | L |        |        |                                                                      |
| 234 | 1 | 1q31.3 | 194119587 | 194141413 | 21827  | 0.11 | Y | L |        |        |                                                                      |
| 235 | 1 | 1q31.3 | 194204325 | 194230549 | 26225  | 0.45 | Y | L |        |        |                                                                      |
| 236 | 1 | 1q31.3 | 194266867 | 194298985 | 32119  | 0.17 | Y | L |        |        |                                                                      |
| 237 | 1 | 1q31.3 | 194320058 | 194341398 | 21341  | 0.06 | Y | L |        |        |                                                                      |
| 238 | 1 | 1q31.3 | 194431895 | 194504541 | 72647  | 0.11 | Y | L | 610044 |        |                                                                      |
| 239 | 1 | 1q31.3 | 194545876 | 194592052 | 46177  | 0.70 | Y | L | 610044 |        |                                                                      |
| 240 | 1 | 1q31.3 | 194622041 | 194698746 | 76706  | 1.79 | Y | L | 610044 |        |                                                                      |
| 241 | 1 | 1q31.3 | 194994474 | 195182368 | 187895 | 6.32 | Y | L | 605336 | 605336 | {Hemolytic uremic syndrome, atypical, susceptibility to}, 235400 (3) |
| 242 | 1 | 1q31.3 | 195512483 | 195535287 | 22805  | 0.22 | N | L | 604210 | 604210 | Leber congenital amaurosis 8 (3)                                     |
| 243 | 1 | 1q31.3 | 195741188 | 195761859 | 20672  | 0.42 | Y | L |        |        |                                                                      |
| 244 | 1 | 1q31.3 | 195822483 | 195871990 | 49508  | 1.70 | N | L |        |        |                                                                      |
| 245 | 1 | 1q31.3 | 196529301 | 196558860 | 29560  | 0.48 | N | L | 606848 |        |                                                                      |
| 246 | 1 | 1q31.3 | 196571159 | 196578583 | 7425   | 0.06 | Y | L |        |        |                                                                      |
| 247 | 1 | 1q31.3 | 196587607 | 196683645 | 96039  | 1.59 | N | C |        |        |                                                                      |
| 248 | 1 | 1q31.3 | 196746566 | 196788716 | 42151  | 0.14 | Y | L |        |        |                                                                      |
| 249 | 1 | 1q31.3 | 196958987 | 197018385 | 59399  | 2.93 | N | L | 608971 |        |                                                                      |
| 250 | 1 | 1q31.3 | 197117147 | 197170876 | 53730  | 1.82 | N | L |        |        |                                                                      |
| 251 | 1 | 1q31.3 | 197378049 | 197387429 | 9381   | 0.08 | Y | L |        |        |                                                                      |
| 252 | 1 | 1q32.1 | 197584242 | 197685522 | 101281 | 0.81 | N | L |        |        |                                                                      |
| 253 | 1 | 1q32.1 | 198418378 | 198432507 | 14130  | 0.22 | N | L |        |        |                                                                      |
| 254 | 1 | 1q32.1 | 198882140 | 199015544 | 133405 | 0.08 | Y | G |        |        |                                                                      |
| 255 | 1 | 1q32.1 | 203035583 | 203058789 | 23207  | 0.31 | N | L |        |        |                                                                      |
| 256 | 1 | 1q32.1 | 204393397 | 204457852 | 64456  | 0.06 | Y | L | 600264 |        |                                                                      |
| 257 | 1 | 1q32.2 | 206656528 | 206692354 | 35827  | 0.14 | N | L |        |        |                                                                      |

|     |   |               |           |           |        |       |   |   |        |        |                                     |
|-----|---|---------------|-----------|-----------|--------|-------|---|---|--------|--------|-------------------------------------|
| 258 | 1 | 1q32.2        | 206929276 | 206949984 | 20709  | 0.06  | N | L |        |        |                                     |
| 259 | 1 | 1q32.2        | 207688384 | 207703719 | 15336  | 0.14  | N | L |        |        |                                     |
| 260 | 1 | 1q32.2        | 207710809 | 207733336 | 22528  | 0.08  | N | L |        |        |                                     |
| 261 | 1 | 1q32.2        | 208148409 | 208175096 | 26688  | 0.08  | Y | C |        |        |                                     |
| 262 | 1 | 1q32.2        | 208784710 | 208798948 | 14239  | 0.14  | Y | L | 605743 |        |                                     |
| 263 | 1 | 1q41          | 212175264 | 212202620 | 27357  | 0.20  | N | L |        |        |                                     |
| 264 | 1 | 1q41          | 213025381 | 213036702 | 11322  | 0.06  | N | L |        |        |                                     |
| 265 | 1 | 1q41          | 213332299 | 213350866 | 18568  | 0.08  | N | L | 603219 |        |                                     |
| 266 | 1 | 1q41          | 213385781 | 213405760 | 19980  | 0.08  | N | L | 603219 |        |                                     |
| 267 | 1 | 1q41          | 213559984 | 213612425 | 52442  | 2.88  | Y | L |        |        |                                     |
| 268 | 1 | 1q41          | 214136154 | 214181449 | 45296  | 0.17  | Y | L | 608400 | 608400 | Retinitis pigmentosa-39, 268000 (3) |
| 269 | 1 | 1q41          | 214653108 | 214671076 | 17969  | 0.06  | N | L | 608400 | 608400 | Retinitis pigmentosa-39, 268000 (3) |
| 270 | 1 | 1q41          | 214763283 | 214812222 | 48940  | 1.23  | N | L | 602969 |        |                                     |
| 271 | 1 | 1q41          | 214883412 | 214902674 | 19263  | 0.08  | N | L | 602969 |        |                                     |
| 272 | 1 | 1q41          | 214992595 | 215062302 | 69708  | 1.29  | N | L |        |        |                                     |
| 273 | 1 | 1q41          | 215434974 | 215473481 | 38508  | 0.56  | N | C |        |        |                                     |
| 274 | 1 | 1q41          | 216305118 | 216319935 | 14818  | 1.96  | Y | L |        |        |                                     |
| 275 | 1 | 1q41          | 216432673 | 216441249 | 8577   | 0.06  | N | L |        |        |                                     |
| 276 | 1 | 1q41          | 217203759 | 217211502 | 7744   | 0.06  | N | L |        |        |                                     |
| 277 | 1 | 1q41          | 217255929 | 217309902 | 53974  | 0.06  | N | L |        |        |                                     |
| 278 | 1 | 1q41          | 217359999 | 217381439 | 21441  | 0.06  | N | L |        |        |                                     |
| 279 | 1 | 1q41          | 217905980 | 217933848 | 27869  | 0.17  | N | L |        |        |                                     |
| 280 | 1 | 1q41          | 217947571 | 217962963 | 15393  | 0.08  | N | C |        |        |                                     |
| 281 | 1 | 1q41          | 218023857 | 218034929 | 11073  | 0.14  | N | L |        |        |                                     |
| 282 | 1 | 1q41          | 219879789 | 219900230 | 20442  | 0.53  | N | L |        |        |                                     |
| 283 | 1 | 1q41          | 220045990 | 220069575 | 23586  | 0.22  | N | L |        |        |                                     |
| 284 | 1 | 1q41          | 220609152 | 220628642 | 19491  | 0.11  | N | L |        |        |                                     |
| 285 | 1 | 1q42.13       | 226454246 | 226477064 | 22819  | 0.06  | Y | L | 608616 |        |                                     |
| 286 | 1 | 1q42.2        | 230877527 | 230894167 | 16641  | 0.06  | Y | L |        |        |                                     |
| 287 | 1 | 1q42.2        | 231491411 | 231514154 | 22744  | 0.06  | N | L |        |        |                                     |
| 288 | 1 | 1q42.2        | 231973481 | 232013832 | 40352  | 0.06  | N | L |        |        |                                     |
| 289 | 1 | 1q42.2        | 232123846 | 232150331 | 26486  | 0.78  | N | L |        |        |                                     |
| 290 | 1 | 1q43          | 234889503 | 234903981 | 14479  | 0.59  | N | L |        |        |                                     |
| 291 | 1 | 1q43          | 236817557 | 236829721 | 12165  | 0.34  | Y | L |        |        |                                     |
| 292 | 1 | 1q43          | 236916554 | 236922748 | 6195   | 0.11  | Y | L |        |        |                                     |
| 293 | 1 | 1q43          | 237258221 | 237282397 | 24177  | 0.11  | N | C |        |        |                                     |
| 294 | 1 | 1q43          | 237943889 | 237964287 | 20399  | 0.08  | Y | L | 118494 |        |                                     |
| 295 | 1 | 1q44          | 244445588 | 244460943 | 15356  | 0.14  | Y | L | 608783 |        |                                     |
| 296 | 1 | 1q44          | 245406391 | 245424184 | 17794  | 0.08  | Y | L |        |        |                                     |
| 297 | 1 | 1q44          | 245872542 | 245942038 | 69497  | 0.06  | Y | L | 611677 |        |                                     |
| 298 | 1 | 1q44          | 246521546 | 246533715 | 12170  | 0.06  | Y | L |        |        |                                     |
| 299 | 1 | 1q44          | 246636579 | 246652923 | 16345  | 0.06  | Y | L |        |        |                                     |
| 300 | 1 | 1q44          | 246750023 | 246911641 | 161619 | 12.86 | Y | C |        |        |                                     |
| 301 | 2 | 2p25.3        | 3801840   | 3815802   | 13963  | 0.06  | N | G |        |        |                                     |
| 302 | 2 | 2p25.3-2p25.2 | 4050678   | 4786597   | 735920 | 0.20  | Y | L |        |        |                                     |
| 303 | 2 | 2p25.2        | 6606200   | 6679082   | 72883  | 1.84  | N | L |        |        |                                     |
| 304 | 2 | 2p25.1        | 7993072   | 8064864   | 71793  | 0.14  | Y | L |        |        |                                     |
| 305 | 2 | 2p25.1        | 10036135  | 10056672  | 20538  | 1.70  | N | L | 609786 |        |                                     |
| 306 | 2 | 2p25.1        | 11490266  | 11509898  | 19633  | 0.56  | N | L | 602944 |        |                                     |
| 307 | 2 | 2p25.1        | 12746424  | 12758896  | 12473  | 0.06  | N | L |        |        |                                     |
| 308 | 2 | 2p24.3        | 13516344  | 13719179  | 202836 | 0.64  | Y | C |        |        |                                     |
| 309 | 2 | 2p24.3        | 13828162  | 13905981  | 77820  | 0.08  | N | G |        |        |                                     |
| 310 | 2 | 2p24.3        | 13906645  | 13982773  | 76129  | 0.08  | N | G |        |        |                                     |
| 311 | 2 | 2p24.3        | 13986227  | 14012242  | 26016  | 0.06  | N | G |        |        |                                     |
| 312 | 2 | 2p24.3        | 14119079  | 14250354  | 131276 | 0.98  | Y | C |        |        |                                     |
| 313 | 2 | 2p24.3        | 14277550  | 14286419  | 8870   | 0.08  | Y | L |        |        |                                     |
| 314 | 2 | 2p24.3        | 14706578  | 14800433  | 93856  | 1.79  | N | L | 611234 |        |                                     |
| 315 | 2 | 2p24.3        | 15076389  | 15135603  | 59215  | 0.64  | Y | L |        |        |                                     |
| 316 | 2 | 2p24.3        | 16583928  | 16611247  | 27320  | 0.89  | Y | L |        |        |                                     |
| 317 | 2 | 2p24.3        | 16854412  | 16885255  | 30844  | 0.45  | N | L |        |        |                                     |
| 318 | 2 | 2p24.3        | 16977626  | 16980665  | 3040   | 0.28  | N | L |        |        |                                     |
| 319 | 2 | 2p24.2        | 17309594  | 17327205  | 17612  | 0.14  | N | L |        |        |                                     |
| 320 | 2 | 2p24.2        | 18048653  | 18069894  | 21242  | 0.17  | Y | C |        |        |                                     |
| 321 | 2 | 2p24.2        | 18334240  | 18361324  | 27085  | 0.67  | Y | L |        |        |                                     |
| 322 | 2 | 2p24.2        | 19005317  | 19030246  | 24930  | 0.14  | N | L |        |        |                                     |
| 323 | 2 | 2p24.1        | 19550305  | 19595627  | 45323  | 0.70  | N | L |        |        |                                     |
| 324 | 2 | 2p24.1        | 21771632  | 21914913  | 143282 | 2.26  | Y | L |        |        |                                     |
| 325 | 2 | 2p24.1        | 21995761  | 22051447  | 55687  | 0.22  | N | L |        |        |                                     |
| 326 | 2 | 2p24.1        | 22109130  | 22150508  | 41379  | 0.22  | Y | L |        |        |                                     |

|     |   |        |          |          |        |       |   |   |        |        |                                                      |  |
|-----|---|--------|----------|----------|--------|-------|---|---|--------|--------|------------------------------------------------------|--|
| 327 | 2 | 2p24.1 | 22309026 | 22331521 | 22496  | 0.31  | Y | L |        |        |                                                      |  |
| 328 | 2 | 2p24.1 | 22548918 | 22611396 | 62479  | 2.74  | Y | C |        |        |                                                      |  |
| 329 | 2 | 2p23.2 | 29498982 | 29507992 | 9011   | 0.08  | Y | G | 105590 | 105590 | {Neuroblastoma, susceptibility to, 3}, 613014 (3)    |  |
| 330 | 2 | 2p23.2 | 29715125 | 29757864 | 42740  | 0.34  | Y | L | 105590 | 105590 | {Neuroblastoma, susceptibility to, 3}, 613014 (3)    |  |
| 331 | 2 | 2p23.1 | 31603921 | 31632908 | 28988  | 0.14  | N | L | 607306 | 607306 | Pseudovaginal perineoscrotal hypospadias, 264600 (3) |  |
| 332 | 2 | 2p22.3 | 32738988 | 32767111 | 28124  | 0.08  | Y | L |        |        |                                                      |  |
| 333 | 2 | 2p22.3 | 33913608 | 34155784 | 242177 | 0.11  | Y | C |        |        |                                                      |  |
| 334 | 2 | 2p22.3 | 34172598 | 34182081 | 9484   | 0.06  | N | L |        |        |                                                      |  |
| 335 | 2 | 2p22.3 | 34683268 | 34755957 | 72690  | 0.25  | Y | L |        |        |                                                      |  |
| 336 | 2 | 2p22.3 | 35101551 | 35216543 | 114993 | 0.20  | Y | L |        |        |                                                      |  |
| 337 | 2 | 2p22.3 | 35300712 | 35365687 | 64976  | 0.48  | Y | L |        |        |                                                      |  |
| 338 | 2 | 2p22.3 | 35726368 | 35733769 | 7402   | 1.12  | Y | L |        |        |                                                      |  |
| 339 | 2 | 2p22.3 | 35810401 | 35850977 | 40577  | 15.32 | Y | C |        |        |                                                      |  |
| 340 | 2 | 2p22.3 | 36120314 | 36153638 | 33325  | 0.08  | Y | L |        |        |                                                      |  |
| 341 | 2 | 2p22.3 | 36326536 | 36373854 | 47319  | 0.11  | Y | L |        |        |                                                      |  |
| 342 | 2 | 2p22.2 | 36656306 | 36665068 | 8763   | 0.06  | N | L | 604826 |        |                                                      |  |
| 343 | 2 | 2p22.1 | 39995114 | 40124038 | 128925 | 0.20  | Y | L |        |        |                                                      |  |
| 344 | 2 | 2p22.1 | 40277948 | 40288974 | 11027  | 0.06  | Y | L | 182305 |        |                                                      |  |
| 345 | 2 | 2p22.1 | 40437099 | 40468157 | 31059  | 0.50  | Y | L | 182305 |        |                                                      |  |
| 346 | 2 | 2p22.1 | 40603414 | 40617519 | 14106  | 0.14  | N | L |        |        |                                                      |  |
| 347 | 2 | 2p22.1 | 40679466 | 40709765 | 30300  | 0.34  | Y | L |        |        |                                                      |  |
| 348 | 2 | 2p22.1 | 40756436 | 40802450 | 46015  | 1.15  | Y | L |        |        |                                                      |  |
| 349 | 2 | 2p22.1 | 40843820 | 40864207 | 20388  | 0.06  | Y | L |        |        |                                                      |  |
| 350 | 2 | 2p22.1 | 40962039 | 40976823 | 14785  | 0.06  | N | L |        |        |                                                      |  |
| 351 | 2 | 2p22.1 | 40983535 | 41069269 | 85735  | 1.34  | N | L |        |        |                                                      |  |
| 352 | 2 | 2p22.1 | 41091709 | 41099222 | 7514   | 0.28  | Y | L |        |        |                                                      |  |
| 353 | 2 | 2p22.1 | 41144991 | 41187295 | 42305  | 1.09  | Y | L |        |        |                                                      |  |
| 354 | 2 | 2p22.1 | 41205539 | 41220908 | 15370  | 0.08  | N | L |        |        |                                                      |  |
| 355 | 2 | 2p22.1 | 41254280 | 41329372 | 75093  | 3.52  | N | L |        |        |                                                      |  |
| 356 | 2 | 2p22.1 | 41372334 | 41419320 | 46987  | 0.08  | N | L |        |        |                                                      |  |
| 357 | 2 | 2p22.1 | 41468994 | 41487209 | 18216  | 0.14  | N | L |        |        |                                                      |  |
| 358 | 2 | 2p21   | 41667678 | 41702339 | 34662  | 0.56  | N | L |        |        |                                                      |  |
| 359 | 2 | 2p21   | 41879416 | 41910115 | 30700  | 0.17  | Y | L |        |        |                                                      |  |
| 360 | 2 | 2p21   | 42858497 | 42876472 | 17976  | 0.06  | N | G | 604521 |        |                                                      |  |
| 361 | 2 | 2p21   | 44085388 | 44086909 | 1522   | 0.06  | Y | L |        |        |                                                      |  |
| 362 | 2 | 2p21   | 46547996 | 46552965 | 4970   | 0.42  | Y | L |        |        |                                                      |  |
| 363 | 2 | 2p16.3 | 47713120 | 47728217 | 15098  | 0.08  | N | L |        |        |                                                      |  |
| 364 | 2 | 2p16.3 | 48455320 | 48495333 | 40014  | 0.06  | N | L | 143089 |        |                                                      |  |
| 365 | 2 | 2p16.3 | 49076076 | 49096169 | 20094  | 0.06  | Y | L | 136435 | 136435 | Ovarian dysgenesis 1, 233300 (3)                     |  |
| 366 | 2 | 2p16.3 | 49160796 | 49185371 | 24576  | 0.11  | N | L | 136435 | 136435 | Ovarian dysgenesis 1, 233300 (3)                     |  |
| 367 | 2 | 2p16.3 | 49340073 | 49402854 | 62782  | 0.48  | Y | L |        |        |                                                      |  |
| 368 | 2 | 2p16.3 | 49492625 | 49607203 | 114579 | 0.06  | N | L |        |        |                                                      |  |
| 369 | 2 | 2p16.3 | 50181566 | 50187687 | 6122   | 0.11  | N | L | 600565 | 600565 | {?Autism, susceptibility to}, 209850 (3)             |  |
| 370 | 2 | 2p16.3 | 50227491 | 50237717 | 10227  | 0.11  | N | L | 600565 | 600565 | {?Autism, susceptibility to}, 209850 (3)             |  |
| 371 | 2 | 2p16.3 | 50293470 | 50353625 | 60156  | 1.90  | N | L | 600565 | 600565 | {?Autism, susceptibility to}, 209850 (3)             |  |
| 372 | 2 | 2p16.3 | 50539750 | 50558602 | 18853  | 0.53  | N | L | 600565 | 600565 | {?Autism, susceptibility to}, 209850 (3)             |  |
| 373 | 2 | 2p16.3 | 50724097 | 50881131 | 157035 | 0.84  | Y | L | 600565 | 600565 | {?Autism, susceptibility to}, 209850 (3)             |  |
| 374 | 2 | 2p16.3 | 50942075 | 51020480 | 78406  | 0.45  | Y | L | 600565 | 600565 | {?Autism, susceptibility to}, 209850 (3)             |  |
| 375 | 2 | 2p16.3 | 51052533 | 51103271 | 50739  | 1.98  | Y | L | 600565 | 600565 | {?Autism, susceptibility to}, 209850 (3)             |  |
| 376 | 2 | 2p16.3 | 51177841 | 51344213 | 166373 | 0.31  | Y | L |        |        |                                                      |  |
| 377 | 2 | 2p16.3 | 51368139 | 51379799 | 11661  | 0.06  | Y | L |        |        |                                                      |  |

|     |   |        |          |          |         |       |   |   |        |
|-----|---|--------|----------|----------|---------|-------|---|---|--------|
| 378 | 2 | 2p16.3 | 51508849 | 51524684 | 15836   | 0.06  | Y | L |        |
| 379 | 2 | 2p16.3 | 51718273 | 51787850 | 69578   | 0.31  | Y | L |        |
| 380 | 2 | 2p16.3 | 52276259 | 52298457 | 22199   | 0.08  | N | L |        |
| 381 | 2 | 2p16.3 | 52372892 | 52392909 | 20018   | 0.08  | N | L |        |
| 382 | 2 | 2p16.3 | 52574819 | 52646441 | 71623   | 35.91 | Y | C |        |
| 383 | 2 | 2p16.3 | 52658082 | 52682654 | 24573   | 0.36  | Y | L |        |
| 384 | 2 | 2p16.2 | 52772178 | 52792804 | 20627   | 0.11  | N | L |        |
| 385 | 2 | 2p16.2 | 52984694 | 53023323 | 38630   | 0.75  | Y | L |        |
| 386 | 2 | 2p16.2 | 53211065 | 53314443 | 103379  | 2.01  | Y | L |        |
| 387 | 2 | 2p16.2 | 53447737 | 53470764 | 23028   | 0.06  | N | L |        |
| 388 | 2 | 2p16.2 | 54407613 | 54436921 | 29309   | 0.14  | Y | L |        |
| 389 | 2 | 2p16.1 | 56307204 | 56334651 | 27448   | 0.14  | Y | L |        |
| 390 | 2 | 2p16.1 | 56455844 | 56497459 | 41616   | 1.17  | Y | L |        |
| 391 | 2 | 2p16.1 | 56581628 | 56669112 | 87485   | 3.47  | Y | L |        |
| 392 | 2 | 2p16.1 | 56762695 | 56788547 | 25853   | 0.08  | N | L |        |
| 393 | 2 | 2p16.1 | 56814645 | 56855641 | 40997   | 1.54  | N | L |        |
| 394 | 2 | 2p16.1 | 56870996 | 56883018 | 12023   | 0.08  | N | L |        |
| 395 | 2 | 2p16.1 | 57001806 | 57067543 | 65738   | 3.07  | Y | L |        |
| 396 | 2 | 2p16.1 | 57255829 | 57308976 | 53148   | 0.39  | Y | C |        |
| 397 | 2 | 2p16.1 | 57369552 | 57510115 | 140564  | 0.17  | Y | L |        |
| 398 | 2 | 2p16.1 | 57608300 | 57654947 | 46648   | 0.42  | N | L |        |
| 399 | 2 | 2p16.1 | 58692206 | 58786514 | 94309   | 2.99  | Y | L |        |
| 400 | 2 | 2p16.1 | 58880499 | 58994370 | 113872  | 2.32  | Y | L |        |
| 401 | 2 | 2p16.1 | 59305666 | 59466421 | 160756  | 0.31  | Y | L |        |
| 402 | 2 | 2p16.1 | 59702231 | 59749285 | 47055   | 0.31  | Y | L |        |
| 403 | 2 | 2p16.1 | 59790353 | 59802999 | 12647   | 0.06  | Y | L |        |
| 404 | 2 | 2p16.1 | 59897669 | 59909952 | 12284   | 0.08  | Y | L |        |
| 405 | 2 | 2p16.1 | 60008824 | 60039406 | 30583   | 0.50  | Y | L |        |
| 406 | 2 | 2p16.1 | 60177631 | 60217634 | 40004   | 0.14  | Y | L |        |
| 407 | 2 | 2p16.1 | 60343826 | 60353919 | 10094   | 0.25  | Y | L |        |
| 408 | 2 | 2p15   | 61406171 | 61432419 | 26249   | 0.11  | N | L |        |
| 409 | 2 | 2p14   | 64575974 | 64597092 | 21119   | 0.11  | N | L |        |
| 410 | 2 | 2p14   | 66062989 | 66092345 | 29357   | 0.42  | N | C |        |
| 411 | 2 | 2p14   | 66951054 | 67046325 | 95272   | 0.14  | N | L |        |
| 412 | 2 | 2p14   | 67145445 | 67184277 | 38833   | 0.20  | Y | L |        |
| 413 | 2 | 2p14   | 67242641 | 67285967 | 43327   | 0.61  | Y | L |        |
| 414 | 2 | 2p14   | 68032602 | 68067560 | 34959   | 0.59  | N | L |        |
| 415 | 2 | 2p14   | 69062338 | 69074842 | 12505   | 1.17  | N | L |        |
| 416 | 2 | 2p14   | 69789389 | 69878961 | 89573   | 0.06  | Y | L | 106491 |
| 417 | 2 | 2p13.3 | 72103481 | 72133488 | 30008   | 0.06  | N | L |        |
| 418 | 2 | 2p13.2 | 73722704 | 73743684 | 20981   | 0.17  | Y | C | 606716 |
| 419 | 2 | 2p12   | 76325842 | 76375971 | 50130   | 0.48  | N | L |        |
| 420 | 2 | 2p12   | 76401304 | 76420715 | 19412   | 0.06  | Y | L |        |
| 421 | 2 | 2p12   | 76575813 | 76594135 | 18323   | 0.11  | N | L |        |
| 422 | 2 | 2p12   | 76615993 | 76627501 | 11509   | 0.06  | N | L |        |
| 423 | 2 | 2p12   | 77027862 | 77089031 | 61170   | 2.12  | Y | L |        |
| 424 | 2 | 2p12   | 77839489 | 77849626 | 10138   | 0.61  | Y | G |        |
| 425 | 2 | 2p12   | 78249775 | 78350650 | 100876  | 0.22  | Y | C |        |
| 426 | 2 | 2p12   | 78416850 | 78487956 | 71107   | 0.17  | Y | L |        |
| 427 | 2 | 2p12   | 78493754 | 78510888 | 17135   | 0.06  | Y | L |        |
| 428 | 2 | 2p12   | 78531422 | 78568340 | 36919   | 0.08  | Y | L |        |
| 429 | 2 | 2p12   | 79091126 | 79105815 | 14690   | 0.22  | N | L |        |
| 430 | 2 | 2p12   | 79415156 | 79450237 | 35082   | 0.08  | N | L |        |
| 431 | 2 | 2p12   | 80679222 | 80709976 | 30755   | 0.06  | Y | L | 114025 |
| 432 | 2 | 2p12   | 81023301 | 81184059 | 160759  | 2.15  | Y | C |        |
| 433 | 2 | 2p12   | 81331645 | 81400551 | 68907   | 0.11  | Y | L |        |
| 434 | 2 | 2p12   | 81500509 | 81542599 | 42091   | 2.82  | N | L |        |
| 435 | 2 | 2p12   | 81721260 | 81750968 | 29709   | 0.17  | Y | L |        |
| 436 | 2 | 2p12   | 81880768 | 81890603 | 9836    | 0.34  | N | L |        |
| 437 | 2 | 2p12   | 81944457 | 81964036 | 19580   | 0.14  | N | L |        |
| 438 | 2 | 2p12   | 82122218 | 82171367 | 49150   | 0.06  | Y | L |        |
| 439 | 2 | 2p12   | 82276609 | 82281731 | 5123    | 0.06  | Y | L |        |
| 440 | 2 | 2p12   | 83011747 | 83038495 | 26749   | 0.14  | Y | G |        |
| 441 | 2 | 2p11.2 | 83722624 | 83753125 | 30502   | 0.48  | Y | L |        |
| 442 | 2 | 2p11.2 | 84144100 | 84169036 | 24937   | 0.31  | Y | L |        |
| 443 | 2 | 2p11.2 | 84196901 | 84268999 | 72099   | 0.39  | N | L |        |
| 444 | 2 | 2p11.2 | 85111251 | 85165784 | 54534   | 0.06  | N | L |        |
| 445 | 2 | 2p11.2 | 86496877 | 87334858 | 837982  | 0.20  | Y | C | 611512 |
| 446 | 2 | 2p11.2 | 87339668 | 87915879 | 576212  | 0.25  | Y | L | 173340 |
| 447 | 2 | 2p11.2 | 88914533 | 89270861 | 356329  | 0.53  | Y | L |        |
| 448 | 2 | 2p11.2 | 89328978 | 90981183 | 1652206 | 7.18  | Y | C |        |
| 449 | 2 | 2q11.2 | 95889678 | 95975419 | 85742   | 6.12  | Y | L |        |
| 450 | 2 | 2q11.2 | 97122680 | 97520685 | 398006  | 2.29  | Y | L |        |
| 451 | 2 | 2q11.2 | 98242563 | 98244513 | 1951    | 0.22  | Y | L |        |

|     |   |                   |           |           |         |      |   |   |        |
|-----|---|-------------------|-----------|-----------|---------|------|---|---|--------|
| 452 | 2 | 2q11.2            | 98638489  | 98664315  | 25827   | 0.06 | N | L | 604623 |
| 453 | 2 | 2q11.2            | 101027972 | 101072421 | 44450   | 0.06 | Y | L |        |
| 454 | 2 | 2q11.2            | 101128008 | 101148429 | 20422   | 0.06 | Y | L |        |
| 455 | 2 | 2q12.1            | 102190633 | 102206187 | 15555   | 1.15 | N | L | 604512 |
| 456 | 2 | 2q12.1            | 102501084 | 102511858 | 10775   | 0.11 | N | L | 600531 |
| 457 | 2 | 2q12.1            | 102518294 | 102549077 | 30784   | 0.06 | N | L |        |
| 458 | 2 | 2q12.1            | 102910816 | 102925726 | 14911   | 0.08 | N | L |        |
| 459 | 2 | 2q12.1            | 104064864 | 104073178 | 8315    | 0.08 | Y | L |        |
| 460 | 2 | 2q12.3            | 107670162 | 107703998 | 33837   | 0.81 | N | L |        |
| 461 | 2 | 2q12.3            | 107926309 | 107969417 | 43109   | 0.56 | Y | C |        |
| 462 | 2 | 2q13              | 110214178 | 111135186 | 921009  | 0.31 | Y | C | 602022 |
| 463 | 2 | 2q14.1            | 114468860 | 114815331 | 346472  | 0.11 | N | C |        |
| 464 | 2 | 2q14.1            | 115143670 | 115173543 | 29874   | 0.50 | N | L |        |
| 465 | 2 | 2q14.1            | 115901805 | 115984798 | 82994   | 1.26 | N | L | 608209 |
| 466 | 2 | 2q14.1            | 116790077 | 116878992 | 88916   | 1.57 | N | L |        |
| 467 | 2 | 2q14.1            | 116896360 | 116920016 | 23657   | 0.08 | N | L |        |
| 468 | 2 | 2q14.1            | 117305016 | 117337603 | 32588   | 0.08 | Y | L |        |
| 469 | 2 | 2q14.1            | 117348918 | 117461061 | 112144  | 3.52 | Y | L |        |
| 470 | 2 | 2q14.1            | 117870020 | 117909241 | 39222   | 1.68 | Y | L |        |
| 471 | 2 | 2q14.1            | 118031702 | 118051097 | 19396   | 0.08 | Y | L |        |
| 472 | 2 | 2q14.2            | 121602318 | 121614327 | 12010   | 0.06 | N | L |        |
| 473 | 2 | 2q14.3            | 123200238 | 123272644 | 72407   | 2.21 | N | L |        |
| 474 | 2 | 2q14.3            | 123370982 | 123449409 | 78428   | 4.00 | N | L |        |
| 475 | 2 | 2q14.3            | 123613915 | 123665940 | 52026   | 0.70 | N | L |        |
| 476 | 2 | 2q14.3            | 123772494 | 123814303 | 41810   | 2.18 | N | L |        |
| 477 | 2 | 2q14.3            | 123886065 | 123892895 | 6831    | 0.28 | N | L |        |
| 478 | 2 | 2q14.3            | 124004886 | 124083255 | 78370   | 0.48 | N | L |        |
| 479 | 2 | 2q14.3            | 124708010 | 124768512 | 60503   | 0.48 | N | L | 610519 |
| 480 | 2 | 2q14.3            | 125152857 | 125241169 | 88313   | 0.14 | N | L | 610519 |
| 481 | 2 | 2q14.3            | 125365158 | 125410611 | 45454   | 0.36 | Y | L | 610519 |
| 482 | 2 | 2q14.3            | 125636477 | 125726348 | 89872   | 1.26 | N | L |        |
| 483 | 2 | 2q14.3            | 126304778 | 126498269 | 193492  | 0.59 | N | L |        |
| 484 | 2 | 2q14.3            | 126588175 | 126624299 | 36125   | 0.48 | N | L |        |
| 485 | 2 | 2q14.3            | 129355298 | 129368883 | 13586   | 0.06 | Y | L |        |
| 486 | 2 | 2q21.1            | 130928357 | 130960690 | 32334   | 0.06 | Y | L |        |
| 487 | 2 | 2q21.1            | 131882678 | 131901446 | 18769   | 0.06 | Y | G |        |
| 488 | 2 | 2q21.1            | 131904283 | 131925407 | 21125   | 0.06 | Y | G |        |
| 489 | 2 | 2q21.2-<br>2q21.3 | 134759960 | 134827792 | 67833   | 0.56 | N | L | 601774 |
| 490 | 2 | 2q21.3-<br>2q22.1 | 136247722 | 137716696 | 1468975 | 2.46 | Y | C | 611216 |
| 491 | 2 | 2q22.1            | 137769483 | 137781646 | 12164   | 0.06 | N | L |        |
| 492 | 2 | 2q22.1            | 138168911 | 138175914 | 7004    | 0.06 | N | L |        |
| 493 | 2 | 2q22.1            | 138328698 | 138351436 | 22739   | 0.48 | N | L |        |
| 494 | 2 | 2q22.1            | 138607419 | 138647819 | 40401   | 0.25 | Y | L |        |
| 495 | 2 | 2q22.1            | 139506646 | 139592535 | 85890   | 5.84 | Y | L |        |
| 496 | 2 | 2q22.1            | 139658383 | 139679356 | 20974   | 0.22 | N | L |        |
| 497 | 2 | 2q22.1            | 139920877 | 140003719 | 82843   | 0.50 | Y | L |        |
| 498 | 2 | 2q22.1            | 140030736 | 140120823 | 90088   | 2.54 | N | L |        |
| 499 | 2 | 2q22.1            | 140283396 | 140299602 | 16207   | 0.08 | N | L |        |
| 500 | 2 | 2q22.1            | 140652118 | 140854714 | 202597  | 6.99 | N | L | 608766 |
| 501 | 2 | 2q22.1            | 141003754 | 141028685 | 24932   | 0.17 | N | L | 608766 |
| 502 | 2 | 2q22.1            | 141455758 | 141542402 | 86645   | 3.77 | N | L | 608766 |
| 503 | 2 | 2q22.1            | 141599179 | 141607916 | 8738    | 0.59 | N | L | 608766 |
| 504 | 2 | 2q22.1            | 141658289 | 141675929 | 17641   | 0.61 | N | L | 608766 |
| 505 | 2 | 2q22.1            | 141794405 | 141824989 | 30585   | 0.17 | Y | L | 608766 |
| 506 | 2 | 2q22.1            | 141991276 | 142031697 | 40422   | 0.28 | N | L | 608766 |
| 507 | 2 | 2q22.1            | 142148346 | 142192694 | 44349   | 1.68 | N | L | 608766 |
| 508 | 2 | 2q22.1            | 142323206 | 142353360 | 30155   | 0.08 | N | L | 608766 |
| 509 | 2 | 2q22.2            | 142419855 | 142440112 | 20258   | 0.28 | N | L | 608766 |
| 510 | 2 | 2q22.2            | 142503756 | 142540221 | 36466   | 0.20 | N | L | 608766 |
| 511 | 2 | 2q22.2            | 142642092 | 142832259 | 190168  | 1.23 | Y | L |        |
| 512 | 2 | 2q22.2            | 142858888 | 142902674 | 43787   | 0.06 | Y | L |        |
| 513 | 2 | 2q22.2            | 143042974 | 143077265 | 34292   | 1.12 | Y | L |        |
| 514 | 2 | 2q22.2            | 143612970 | 143646387 | 33418   | 0.31 | N | L | 610578 |
| 515 | 2 | 2q22.2            | 143840318 | 143914329 | 74012   | 0.08 | N | L | 610578 |
| 516 | 2 | 2q22.2            | 144080129 | 144121590 | 41462   | 0.06 | N | L | 610578 |
| 517 | 2 | 2q22.2            | 144304041 | 144317675 | 13635   | 0.06 | N | L |        |
| 518 | 2 | 2q22.3            | 145229126 | 145323561 | 94436   | 0.81 | N | L |        |
| 519 | 2 | 2q22.3            | 145498016 | 145636667 | 138652  | 1.43 | N | L |        |
| 520 | 2 | 2q22.3            | 145718180 | 145821752 | 103573  | 2.74 | N | L |        |
| 521 | 2 | 2q22.3            | 146216102 | 146262268 | 46167   | 2.35 | N | L |        |
| 522 | 2 | 2q22.3            | 146574802 | 146596803 | 22002   | 3.44 | Y | C |        |
| 523 | 2 | 2q22.3            | 146769285 | 146842343 | 73059   | 0.64 | N | L |        |



|     |   |                   |           |           |        |      |   |   |        |        |  |                                                               |
|-----|---|-------------------|-----------|-----------|--------|------|---|---|--------|--------|--|---------------------------------------------------------------|
| 524 | 2 | 2q22.3            | 146972543 | 146987888 | 15346  | 0.06 | N | L |        |        |  |                                                               |
| 525 | 2 | 2q22.3            | 147079551 | 147124217 | 44667  | 0.08 | N | L |        |        |  |                                                               |
| 526 | 2 | 2q22.3            | 147557087 | 147585253 | 28167  | 0.22 | N | L |        |        |  |                                                               |
| 527 | 2 | 2q22.3            | 147651266 | 147682349 | 31084  | 0.14 | Y | L |        |        |  |                                                               |
| 528 | 2 | 2q22.3            | 147876031 | 147910385 | 34355  | 0.17 | N | L |        |        |  |                                                               |
| 529 | 2 | 2q22.3            | 147926228 | 147956460 | 30233  | 0.36 | N | L |        |        |  |                                                               |
| 530 | 2 | 2q23.1            | 148519048 | 148639560 | 120513 | 0.11 | N | L |        |        |  |                                                               |
| 531 | 2 | 2q23.2-<br>2q23.3 | 150217578 | 150312235 | 94658  | 0.78 | N | L |        |        |  |                                                               |
| 532 | 2 | 2q23.3            | 150422768 | 150442181 | 19414  | 0.08 | Y | L |        |        |  |                                                               |
| 533 | 2 | 2q23.3            | 150558551 | 150593688 | 35138  | 0.20 | N | L |        |        |  |                                                               |
| 534 | 2 | 2q23.3            | 152178790 | 152186194 | 7405   | 0.06 | Y | L | 161650 | 161650 |  | Nemaline myopathy<br>2, autosomal<br>recessive, 256030<br>(3) |
| 535 | 2 | 2q23.3            | 153379429 | 153507078 | 127650 | 1.20 | Y | L |        |        |  |                                                               |
| 536 | 2 | 2q23.3            | 153837754 | 153857383 | 19630  | 0.08 | Y | L |        |        |  |                                                               |
| 537 | 2 | 2q23.3            | 154161257 | 154203761 | 42505  | 0.42 | Y | L |        |        |  |                                                               |
| 538 | 2 | 2q23.3-<br>2q24.1 | 154597766 | 154676939 | 79174  | 0.89 | Y | L | 608369 |        |  |                                                               |
| 539 | 2 | 2q24.1            | 154889396 | 154908046 | 18651  | 0.25 | N | L | 608369 |        |  |                                                               |
| 540 | 2 | 2q24.1            | 155015863 | 155044141 | 28279  | 0.28 | N | L | 608369 |        |  |                                                               |
| 541 | 2 | 2q24.1            | 155546288 | 155597982 | 51695  | 0.25 | N | L |        |        |  |                                                               |
| 542 | 2 | 2q24.1            | 155724238 | 155758663 | 34426  | 0.06 | N | L |        |        |  |                                                               |
| 543 | 2 | 2q24.1            | 155837347 | 155882821 | 45475  | 0.06 | N | L |        |        |  |                                                               |
| 544 | 2 | 2q24.1            | 156000172 | 156056983 | 56812  | 0.31 | Y | L |        |        |  |                                                               |
| 545 | 2 | 2q24.1            | 156075664 | 156117232 | 41569  | 0.78 | Y | L |        |        |  |                                                               |
| 546 | 2 | 2q24.1            | 156718462 | 156749019 | 30558  | 0.14 | N | L |        |        |  |                                                               |
| 547 | 2 | 2q24.1            | 157431162 | 157504179 | 73018  | 1.79 | N | L |        |        |  |                                                               |
| 548 | 2 | 2q24.1            | 158721486 | 158756164 | 34679  | 0.14 | N | L |        |        |  |                                                               |
| 549 | 2 | 2q24.1            | 159421787 | 159440103 | 18317  | 0.14 | Y | C |        |        |  |                                                               |
| 550 | 2 | 2q24.2            | 159656347 | 159672442 | 16096  | 7.49 | Y | L | 611397 |        |  |                                                               |
| 551 | 2 | 2q24.2            | 159783891 | 159791136 | 7246   | 0.08 | N | G | 611397 |        |  |                                                               |
| 552 | 2 | 2q24.2            | 161604026 | 161651372 | 47347  | 0.08 | N | L |        |        |  |                                                               |
| 553 | 2 | 2q24.2            | 161941279 | 161960667 | 19389  | 0.11 | Y | L | 607173 |        |  |                                                               |
| 554 | 2 | 2q24.2            | 162161359 | 162213700 | 52342  | 1.54 | N | L | 605556 |        |  |                                                               |
| 555 | 2 | 2q24.2            | 162907534 | 162985278 | 77745  | 0.89 | N | L | 607030 |        |  |                                                               |
| 556 | 2 | 2q24.2            | 163060831 | 163175525 | 114695 | 4.28 | N | L | 608169 |        |  |                                                               |
| 557 | 2 | 2q24.2            | 163187206 | 163243409 | 56204  | 0.20 | N | L | 608169 |        |  |                                                               |
| 558 | 2 | 2q24.2            | 163250005 | 163271395 | 21391  | 0.17 | N | L | 608169 |        |  |                                                               |
| 559 | 2 | 2q24.3            | 163528171 | 163556820 | 28650  | 0.50 | N | L |        |        |  |                                                               |
| 560 | 2 | 2q24.3            | 163676415 | 163705773 | 29359  | 0.11 | N | L |        |        |  |                                                               |
| 561 | 2 | 2q24.3            | 163958002 | 163990297 | 32296  | 0.92 | N | L |        |        |  |                                                               |
| 562 | 2 | 2q24.3            | 165722473 | 165732166 | 9694   | 0.06 | Y | L | 182391 |        |  |                                                               |
| 563 | 2 | 2q24.3            | 166609463 | 166629033 | 19571  | 0.34 | N | L | 182389 | 182389 |  | Antiepileptic drugs,<br>response to (3)                       |
| 564 | 2 | 2q24.3            | 166813204 | 166838279 | 25076  | 0.17 | N | L | 603415 | 603415 |  | Erythralgia,<br>primary, 133020 (3)                           |
| 565 | 2 | 2q24.3            | 167229368 | 167249433 | 20066  | 0.06 | N | L |        |        |  |                                                               |
| 566 | 2 | 2q24.3            | 167315288 | 167394490 | 79203  | 0.53 | N | L |        |        |  |                                                               |
| 567 | 2 | 2q24.3            | 167516499 | 167529987 | 13489  | 0.06 | N | L | 609778 |        |  |                                                               |
| 568 | 2 | 2q31.1            | 169507071 | 169538761 | 31691  | 1.43 | N | L | 605479 |        |  |                                                               |
| 569 | 2 | 2q31.1            | 171768444 | 171781432 | 12989  | 0.11 | N | L |        |        |  |                                                               |
| 570 | 2 | 2q31.1            | 171806527 | 171835251 | 28725  | 0.14 | N | L |        |        |  |                                                               |
| 571 | 2 | 2q31.1            | 172898071 | 172910469 | 12399  | 0.06 | Y | G |        |        |  |                                                               |
| 572 | 2 | 2q31.2            | 178508768 | 178602031 | 93264  | 0.14 | Y | L | 610475 |        |  |                                                               |
| 573 | 2 | 2q31.2            | 179107443 | 179235373 | 127931 | 7.21 | Y | L | 188840 | 188840 |  | Cardiomyopathy,<br>dilated, 1G, 604145<br>(3)                 |
| 574 | 2 | 2q31.2            | 179284646 | 179323197 | 38552  | 0.17 | Y | L | 188840 | 188840 |  | Cardiomyopathy,<br>dilated, 1G, 604145<br>(3)                 |
| 575 | 2 | 2q31.2            | 180200691 | 180208197 | 7507   | 0.08 | N | L | 612344 |        |  |                                                               |
| 576 | 2 | 2q31.3            | 180852310 | 180919325 | 67016  | 0.61 | N | L |        |        |  |                                                               |
| 577 | 2 | 2q31.3            | 181047440 | 181070557 | 23118  | 0.06 | N | L |        |        |  |                                                               |
| 578 | 2 | 2q31.3            | 181175434 | 181210592 | 35159  | 0.39 | N | L |        |        |  |                                                               |
| 579 | 2 | 2q31.3            | 181502981 | 181531471 | 28491  | 0.50 | N | L |        |        |  |                                                               |
| 580 | 2 | 2q31.3            | 181616979 | 181650188 | 33210  | 0.81 | N | L | 604151 |        |  |                                                               |
| 581 | 2 | 2q31.3            | 181852499 | 181875047 | 22549  | 0.08 | N | L |        |        |  |                                                               |
| 582 | 2 | 2q31.3            | 182076035 | 182090612 | 14578  | 0.08 | N | L | 192975 |        |  |                                                               |
| 583 | 2 | 2q31.3            | 182163022 | 182181883 | 18862  | 0.06 | N | L | 608381 | 608381 |  | Retinitis<br>pigmentosa-26,<br>608380 (3)                     |
| 584 | 2 | 2q31.3            | 182363251 | 182439149 | 75899  | 0.87 | N | L |        |        |  |                                                               |

|     |   |                 |           |           |        |      |   |   |        |        |                                                                  |
|-----|---|-----------------|-----------|-----------|--------|------|---|---|--------|--------|------------------------------------------------------------------|
| 585 | 2 | 2q32.1          | 183004181 | 183021452 | 17272  | 0.50 | N | L | 171890 |        |                                                                  |
| 586 | 2 | 2q32.1          | 183044713 | 183062173 | 17461  | 0.08 | N | L | 171890 |        |                                                                  |
| 587 | 2 | 2q32.1          | 183851960 | 183891220 | 39261  | 0.08 | N | L |        |        |                                                                  |
| 588 | 2 | 2q32.1          | 184063554 | 184101101 | 37548  | 0.20 | Y | L |        |        |                                                                  |
| 589 | 2 | 2q32.1          | 184233703 | 184279800 | 46098  | 0.20 | Y | L |        |        |                                                                  |
| 590 | 2 | 2q32.1          | 184519723 | 184545252 | 25530  | 0.06 | N | L |        |        |                                                                  |
| 591 | 2 | 2q32.1          | 184556872 | 184590546 | 33675  | 0.11 | N | L |        |        |                                                                  |
| 592 | 2 | 2q32.1          | 184820368 | 184884512 | 64145  | 6.34 | Y | L |        |        |                                                                  |
| 593 | 2 | 2q32.1          | 184915418 | 184951874 | 36457  | 0.36 | Y | L |        |        |                                                                  |
| 594 | 2 | 2q32.1          | 185059344 | 185083608 | 24265  | 0.48 | Y | L |        |        |                                                                  |
| 595 | 2 | 2q32.1          | 185443844 | 185486507 | 42664  | 0.25 | Y | C | 612282 |        |                                                                  |
| 596 | 2 | 2q32.1          | 185509211 | 185588329 | 79119  | 2.74 | Y | L | 612282 |        |                                                                  |
| 597 | 2 | 2q32.1          | 186076267 | 186414085 | 337819 | 3.63 | Y | L |        |        |                                                                  |
| 598 | 2 | 2q32.1          | 186556096 | 186581793 | 25698  | 0.06 | N | L |        |        |                                                                  |
| 599 | 2 | 2q32.1          | 186709321 | 186723467 | 14147  | 0.14 | N | L |        |        |                                                                  |
| 600 | 2 | 2q32.1          | 186763306 | 186787854 | 24549  | 0.50 | N | L |        |        |                                                                  |
| 601 | 2 | 2q32.1          | 186962120 | 187004075 | 41956  | 0.08 | N | L |        |        |                                                                  |
| 602 | 2 | 2q32.1          | 187674407 | 187723525 | 49119  | 0.78 | Y | L |        |        |                                                                  |
| 603 | 2 | 2q32.2          | 189213126 | 189256127 | 43002  | 0.42 | N | L |        |        |                                                                  |
| 604 | 2 | 2q32.2          | 189528798 | 189575487 | 46690  | 0.25 | N | L | 130050 |        |                                                                  |
| 605 | 2 | 2q32.3          | 192192223 | 192214008 | 21786  | 0.06 | N | L |        |        |                                                                  |
| 606 | 2 | 2q32.3          | 192356494 | 192379273 | 22780  | 0.20 | N | L |        |        |                                                                  |
| 607 | 2 | 2q32.3          | 192740157 | 192755244 | 15088  | 0.06 | N | L | 605734 |        |                                                                  |
| 608 | 2 | 2q32.3          | 192925555 | 192954254 | 28700  | 0.39 | N | L |        |        |                                                                  |
| 609 | 2 | 2q32.3          | 193237081 | 193449506 | 212426 | 1.43 | Y | L | 605443 |        |                                                                  |
| 610 | 2 | 2q32.3          | 193673297 | 193708236 | 34940  | 0.14 | Y | L |        |        |                                                                  |
| 611 | 2 | 2q32.3          | 193853616 | 193890693 | 37078  | 0.11 | N | L |        |        |                                                                  |
| 612 | 2 | 2q32.3          | 193947659 | 193991154 | 43496  | 0.17 | N | L |        |        |                                                                  |
| 613 | 2 | 2q32.3          | 194047543 | 194085774 | 38232  | 0.06 | N | L |        |        |                                                                  |
| 614 | 2 | 2q32.3          | 194248950 | 194307657 | 58708  | 0.11 | Y | L |        |        |                                                                  |
| 615 | 2 | 2q32.3          | 194384153 | 194410578 | 26426  | 0.11 | Y | G |        |        |                                                                  |
| 616 | 2 | 2q32.3          | 194751398 | 194761726 | 10329  | 0.08 | N | G |        |        |                                                                  |
| 617 | 2 | 2q32.3          | 195260088 | 195280471 | 20384  | 0.20 | N | L |        |        |                                                                  |
| 618 | 2 | 2q32.3          | 195559336 | 195634079 | 74744  | 4.72 | Y | L |        |        |                                                                  |
| 619 | 2 | 2q32.3          | 195700763 | 195772644 | 71882  | 1.73 | Y | L |        |        |                                                                  |
| 620 | 2 | 2q32.3          | 196033459 | 196038467 | 5009   | 0.08 | N | L |        |        |                                                                  |
| 621 | 2 | 2q33.1          | 198260282 | 198281857 | 21576  | 0.06 | N | L | 609728 |        |                                                                  |
| 622 | 2 | 2q33.1          | 198614726 | 198663019 | 48294  | 0.06 | N | L | 600597 |        |                                                                  |
| 623 | 2 | 2q33.1          | 198690456 | 198736717 | 46262  | 0.59 | N | L | 600597 |        |                                                                  |
| 624 | 2 | 2q33.1          | 199519694 | 199561433 | 41740  | 0.11 | N | L |        |        |                                                                  |
| 625 | 2 | 2q33.1          | 201276213 | 201283809 | 7597   | 0.20 | N | G |        |        |                                                                  |
| 626 | 2 | 2q33.3          | 205607335 | 205632522 | 25188  | 0.14 | Y | L |        |        |                                                                  |
| 627 | 2 | 2q33.3-<br>2q34 | 209084350 | 209117837 | 33488  | 0.06 | N | L |        |        |                                                                  |
| 628 | 2 | 2q34            | 209211507 | 209241176 | 29670  | 0.28 | Y | L |        |        |                                                                  |
| 629 | 2 | 2q34            | 209431292 | 209466043 | 34752  | 0.06 | N | L |        |        |                                                                  |
| 630 | 2 | 2q34            | 210082297 | 210124918 | 42622  | 0.08 | N | L |        |        |                                                                  |
| 631 | 2 | 2q34            | 211084615 | 211097828 | 13214  | 0.14 | N | L |        |        |                                                                  |
| 632 | 2 | 2q34            | 211146641 | 211196915 | 50275  | 2.88 | N | L | 608307 | 608307 | Carbamoylphosphat<br>e synthetase I<br>deficiency, 237300<br>(3) |
| 633 | 2 | 2q34            | 211258558 | 211282569 | 24012  | 0.06 | Y | L |        |        |                                                                  |
| 634 | 2 | 2q34            | 211474777 | 211499066 | 24290  | 0.06 | Y | L |        |        |                                                                  |
| 635 | 2 | 2q34            | 211534241 | 211622428 | 88188  | 0.39 | N | L |        |        |                                                                  |
| 636 | 2 | 2q34            | 211688897 | 211703330 | 14434  | 0.06 | N | L |        |        |                                                                  |
| 637 | 2 | 2q34            | 211842796 | 211872799 | 30004  | 0.48 | N | L |        |        |                                                                  |
| 638 | 2 | 2q34            | 212070597 | 212124162 | 53566  | 0.31 | N | L | 600543 |        |                                                                  |
| 639 | 2 | 2q34            | 212286118 | 212328746 | 42629  | 0.06 | Y | L | 600543 |        |                                                                  |
| 640 | 2 | 2q34            | 212390629 | 212517463 | 126835 | 0.08 | Y | L | 600543 |        |                                                                  |
| 641 | 2 | 2q34            | 212784533 | 212796258 | 11726  | 0.08 | N | L | 600543 |        |                                                                  |
| 642 | 2 | 2q34            | 212838082 | 212918035 | 79954  | 4.16 | Y | L | 600543 |        |                                                                  |
| 643 | 2 | 2q34            | 213900951 | 214045089 | 144139 | 0.08 | Y | L | 612173 |        |                                                                  |
| 644 | 2 | 2q34            | 214690342 | 214770092 | 79751  | 1.37 | N | L | 612173 |        |                                                                  |
| 645 | 2 | 2q35            | 216288816 | 216305265 | 16450  | 0.48 | Y | L |        |        |                                                                  |
| 646 | 2 | 2q35            | 216738821 | 216763416 | 24596  | 0.06 | N | L | 194364 |        |                                                                  |
| 647 | 2 | 2q35            | 221199421 | 221224485 | 25065  | 0.11 | Y | C |        |        |                                                                  |
| 648 | 2 | 2q36.1          | 221803100 | 221826748 | 23649  | 0.08 | N | L |        |        |                                                                  |
| 649 | 2 | 2q36.1          | 221836956 | 221851731 | 14776  | 0.08 | N | L |        |        |                                                                  |
| 650 | 2 | 2q36.1          | 223729292 | 223744567 | 15276  | 0.20 | N | L |        |        |                                                                  |
| 651 | 2 | 2q36.1          | 223911359 | 223975329 | 63971  | 0.53 | Y | L |        |        |                                                                  |
| 652 | 2 | 2q36.3          | 225913970 | 225986606 | 72637  | 1.29 | N | L |        |        |                                                                  |
| 653 | 2 | 2q36.3          | 226212730 | 226218537 | 5808   | 0.06 | N | L |        |        |                                                                  |
| 654 | 2 | 2q36.3          | 226254929 | 226290994 | 36066  | 0.06 | N | L |        |        |                                                                  |

|     |   |        |           |           |         |      |   |   |        |
|-----|---|--------|-----------|-----------|---------|------|---|---|--------|
| 655 | 2 | 2q36.3 | 226345133 | 226388157 | 43025   | 0.06 | N | L |        |
| 656 | 2 | 2q36.3 | 226441711 | 226499217 | 57507   | 0.39 | N | L |        |
| 657 | 2 | 2q36.3 | 226821984 | 226897948 | 75965   | 0.95 | Y | L |        |
| 658 | 2 | 2q36.3 | 228679286 | 228698087 | 18802   | 0.08 | N | L | 611646 |
| 659 | 2 | 2q36.3 | 229481594 | 229536702 | 55109   | 0.14 | N | L |        |
| 660 | 2 | 2q37.1 | 230945207 | 230966694 | 21488   | 0.06 | Y | L |        |
| 661 | 2 | 2q37.1 | 232922535 | 232960636 | 38102   | 0.14 | Y | C | 171800 |
| 662 | 2 | 2q37.1 | 232977957 | 232989066 | 11110   | 0.08 | Y | L | 171810 |
| 663 | 2 | 2q37.1 | 234319086 | 234327102 | 8017    | 0.08 | Y | L | 606785 |
| 664 | 2 | 2q37.1 | 234432673 | 234457298 | 24626   | 0.06 | N | L |        |
| 665 | 2 | 2q37.1 | 234656389 | 234672627 | 16239   | 0.39 | Y | L |        |
| 666 | 2 | 2q37.3 | 242689365 | 242717061 | 27697   | 0.08 | Y | C |        |
| 667 | 3 | 3p26.3 | 62187     | 1437721   | 1375535 | 2.32 | Y | C | 607416 |
| 668 | 3 | 3p26.3 | 1562151   | 1575254   | 13104   | 0.20 | Y | L |        |
| 669 | 3 | 3p26.3 | 1631405   | 1802967   | 171563  | 0.31 | Y | C |        |
| 670 | 3 | 3p26.3 | 1866111   | 2032749   | 166639  | 0.36 | Y | L |        |
| 671 | 3 | 3p26.3 | 2542238   | 2556603   | 14366   | 0.53 | Y | L | 607280 |
| 672 | 3 | 3p26.3 | 2713520   | 2718571   | 5052    | 0.98 | Y | L | 607280 |
| 673 | 3 | 3p26.3 | 3103195   | 3136883   | 33689   | 0.06 | Y | L | 147851 |
| 674 | 3 | 3p26.3 | 3299174   | 3321910   | 22737   | 0.34 | Y | L |        |
| 675 | 3 | 3p26.2 | 3922216   | 4315153   | 392938  | 3.66 | Y | L |        |
| 676 | 3 | 3p26.1 | 5663419   | 5815437   | 152019  | 0.59 | N | L |        |
| 677 | 3 | 3p26.1 | 5925548   | 5940594   | 15047   | 0.08 | N | L |        |
| 678 | 3 | 3p26.1 | 6115671   | 6183082   | 67412   | 0.81 | Y | L |        |
| 679 | 3 | 3p26.1 | 6220005   | 6297086   | 77082   | 0.06 | Y | L |        |
| 680 | 3 | 3p26.1 | 6310275   | 6332198   | 21924   | 0.56 | N | L |        |
| 681 | 3 | 3p26.1 | 6429866   | 6456324   | 26459   | 0.08 | N | L |        |
| 682 | 3 | 3p26.1 | 7103565   | 7128652   | 25088   | 0.06 | Y | L | 604101 |
| 683 | 3 | 3p26.1 | 7234313   | 7473917   | 239605  | 1.48 | Y | L | 604101 |
| 684 | 3 | 3p26.1 | 7537364   | 7558071   | 20708   | 6.90 | Y | L | 604101 |
| 685 | 3 | 3p26.1 | 7774831   | 7783040   | 8210    | 0.08 | N | L |        |
| 686 | 3 | 3p26.1 | 7814460   | 7837152   | 22693   | 0.11 | N | L |        |
| 687 | 3 | 3p26.1 | 8088187   | 8113801   | 25615   | 0.06 | N | L |        |
| 688 | 3 | 3p25.2 | 11928640  | 11936858  | 8219    | 0.06 | Y | L |        |
| 689 | 3 | 3p24.3 | 16208246  | 16216183  | 7938    | 0.11 | Y | L |        |
| 690 | 3 | 3p24.3 | 17045586  | 17052240  | 6655    | 0.08 | N | L |        |
| 691 | 3 | 3p24.3 | 18580627  | 18605226  | 24600   | 0.17 | N | L |        |
| 692 | 3 | 3p24.3 | 18640141  | 18698687  | 58547   | 0.50 | N | L |        |
| 693 | 3 | 3p24.3 | 18747774  | 18822715  | 74942   | 2.24 | Y | L |        |
| 694 | 3 | 3p24.3 | 19018732  | 19039998  | 21267   | 0.14 | N | L |        |
| 695 | 3 | 3p24.3 | 19281169  | 19288605  | 7437    | 0.20 | N | L | 608260 |
| 696 | 3 | 3p24.3 | 19358348  | 19375395  | 17048   | 0.17 | N | L | 608260 |
| 697 | 3 | 3p24.3 | 19603993  | 19648347  | 44355   | 0.22 | Y | L |        |
| 698 | 3 | 3p24.3 | 19660487  | 19700069  | 39583   | 0.06 | Y | L |        |
| 699 | 3 | 3p24.3 | 19724089  | 19765007  | 40919   | 0.08 | Y | C |        |
| 700 | 3 | 3p24.3 | 20897304  | 20932239  | 34936   | 0.11 | N | L |        |
| 701 | 3 | 3p24.3 | 20982802  | 21052379  | 69578   | 0.84 | Y | L |        |
| 702 | 3 | 3p24.3 | 21651556  | 21665280  | 13725   | 0.06 | N | L |        |
| 703 | 3 | 3p24.3 | 21783688  | 21802163  | 18476   | 0.42 | Y | L |        |
| 704 | 3 | 3p24.3 | 21857134  | 21896901  | 39768   | 1.70 | Y | L |        |
| 705 | 3 | 3p24.3 | 21960384  | 21982871  | 22488   | 1.12 | Y | L |        |
| 706 | 3 | 3p24.3 | 22104505  | 22135166  | 30662   | 0.17 | Y | L |        |
| 707 | 3 | 3p24.3 | 22230482  | 22526227  | 295746  | 2.91 | Y | C |        |
| 708 | 3 | 3p24.3 | 22535105  | 22541550  | 6446    | 0.06 | Y | L |        |
| 709 | 3 | 3p24.3 | 22634190  | 22668148  | 33959   | 0.06 | N | L |        |
| 710 | 3 | 3p24.3 | 22695632  | 22699154  | 3523    | 0.06 | N | L |        |
| 711 | 3 | 3p24.3 | 23200750  | 23236338  | 35589   | 0.22 | N | L | 602163 |
| 712 | 3 | 3p24.2 | 24363248  | 24448859  | 85612   | 5.09 | N | L | 274300 |
| 713 | 3 | 3p24.2 | 24721324  | 24788964  | 67641   | 0.42 | Y | C |        |
| 714 | 3 | 3p24.2 | 24902923  | 24956705  | 53783   | 0.06 | Y | G |        |
| 715 | 3 | 3p24.2 | 25984780  | 26004152  | 19373   | 0.06 | N | L |        |
| 716 | 3 | 3p24.1 | 26426057  | 26468018  | 41962   | 1.34 | Y | L |        |
| 717 | 3 | 3p24.1 | 26586501  | 26622586  | 36086   | 0.42 | N | L |        |
| 718 | 3 | 3p24.1 | 26685649  | 26710087  | 24439   | 0.06 | N | L |        |
| 719 | 3 | 3p24.1 | 26726151  | 26768409  | 42259   | 0.17 | N | L |        |
| 720 | 3 | 3p24.1 | 26812874  | 26847922  | 35049   | 0.22 | N | L |        |
| 721 | 3 | 3p24.1 | 26904158  | 26933673  | 29516   | 2.12 | N | L |        |
| 722 | 3 | 3p24.1 | 26999792  | 27006023  | 6232    | 0.06 | N | L |        |
| 723 | 3 | 3p24.1 | 27178916  | 27210399  | 31484   | 0.17 | N | L |        |
| 724 | 3 | 3p24.1 | 27974330  | 28008115  | 33786   | 0.06 | N | L |        |
| 725 | 3 | 3p24.1 | 28330390  | 28397049  | 66660   | 0.42 | Y | L | 609916 |
| 726 | 3 | 3p24.1 | 29276920  | 29332144  | 55225   | 2.40 | Y | L | 605786 |
| 727 | 3 | 3p24.1 | 29647848  | 29656862  | 9015    | 0.64 | Y | L | 605786 |
| 728 | 3 | 3p24.1 | 29903731  | 29919991  | 16261   | 0.11 | N | L | 605786 |

|     |   |         |          |          |        |       |   |   |        |
|-----|---|---------|----------|----------|--------|-------|---|---|--------|
| 729 | 3 | 3p24.1  | 30250885 | 30504816 | 253932 | 3.02  | N | L |        |
| 730 | 3 | 3p23    | 30844770 | 30890909 | 46140  | 1.62  | Y | L |        |
| 731 | 3 | 3p23    | 31146441 | 31157664 | 11224  | 0.14  | N | L |        |
| 732 | 3 | 3p23    | 31403429 | 31421891 | 18463  | 0.75  | N | L |        |
| 733 | 3 | 3p23    | 31446105 | 31485678 | 39574  | 0.06  | N | L |        |
| 734 | 3 | 3p22.3  | 34262487 | 34343309 | 80823  | 0.87  | N | L |        |
| 735 | 3 | 3p22.3  | 34508516 | 34709028 | 200513 | 2.40  | N | L |        |
| 736 | 3 | 3p22.3  | 34815557 | 34855035 | 39479  | 0.70  | N | L |        |
| 737 | 3 | 3p22.3  | 35322337 | 35374865 | 52529  | 2.29  | N | L |        |
| 738 | 3 | 3p22.3  | 35572393 | 35614888 | 42496  | 0.22  | N | L |        |
| 739 | 3 | 3p22.3  | 35621228 | 35641939 | 20712  | 0.06  | N | L |        |
| 740 | 3 | 3p22.3  | 35688763 | 35718986 | 30224  | 0.81  | N | L | 605488 |
| 741 | 3 | 3p22.3  | 35854363 | 35889765 | 35403  | 0.22  | Y | L |        |
| 742 | 3 | 3p22.3  | 36108237 | 36174827 | 66591  | 5.45  | Y | L |        |
| 743 | 3 | 3p22.3  | 36186347 | 36272694 | 86348  | 0.89  | Y | L |        |
| 744 | 3 | 3p22.3  | 36276720 | 36290671 | 13952  | 0.45  | Y | L |        |
| 745 | 3 | 3p22.2  | 36551680 | 36638250 | 86571  | 0.73  | N | L | 602317 |
| 746 | 3 | 3p22.2  | 37952421 | 37961811 | 9391   | 0.75  | Y | L | 608592 |
| 747 | 3 | 3p22.1  | 39959540 | 39983638 | 24099  | 0.08  | N | L | 611790 |
| 748 | 3 | 3p22.1  | 41381332 | 41482456 | 101125 | 0.36  | Y | L |        |
| 749 | 3 | 3p22.1  | 41563168 | 41614872 | 51705  | 0.06  | Y | L |        |
| 750 | 3 | 3p21.31 | 46773036 | 46817203 | 44168  | 0.08  | Y | C |        |
| 751 | 3 | 3p21.31 | 47793923 | 47799183 | 5261   | 0.14  | Y | L | 601732 |
| 752 | 3 | 3p21.31 | 50895700 | 50938124 | 42425  | 0.17  | N | L | 603123 |
| 753 | 3 | 3p21.1  | 52997907 | 53016539 | 18633  | 0.50  | Y | L | 607319 |
| 754 | 3 | 3p14.3  | 56047474 | 56068747 | 21274  | 0.08  | N | L |        |
| 755 | 3 | 3p14.3  | 56566007 | 56584937 | 18931  | 0.17  | Y | L |        |
| 756 | 3 | 3p14.2  | 59484647 | 59504815 | 20169  | 0.17  | N | L |        |
| 757 | 3 | 3p14.2  | 59686057 | 59711624 | 25568  | 0.14  | N | L | 601153 |
| 758 | 3 | 3p14.2  | 59940124 | 59967364 | 27241  | 0.45  | N | L | 601153 |
| 759 | 3 | 3p14.2  | 60287554 | 60461930 | 174377 | 0.39  | Y | L | 601153 |
| 760 | 3 | 3p14.2  | 60521284 | 60555753 | 34470  | 0.31  | N | L | 601153 |
| 761 | 3 | 3p14.2  | 60563667 | 60611101 | 47435  | 0.08  | N | G | 601153 |
| 762 | 3 | 3p14.2  | 60755919 | 60769257 | 13339  | 0.06  | Y | L | 601153 |
| 763 | 3 | 3p14.2  | 60970567 | 60976902 | 6336   | 0.34  | Y | L | 601153 |
| 764 | 3 | 3p14.2  | 61334714 | 61378703 | 43990  | 0.06  | N | L |        |
| 765 | 3 | 3p14.2  | 61952758 | 61982347 | 29590  | 0.11  | N | L | 176886 |
| 766 | 3 | 3p14.2  | 62007624 | 62012539 | 4916   | 0.06  | N | L | 176886 |
| 767 | 3 | 3p14.2  | 62584075 | 62591908 | 7834   | 0.14  | Y | L | 604667 |
| 768 | 3 | 3p14.2  | 62637893 | 62666910 | 29018  | 0.11  | Y | L | 604667 |
| 769 | 3 | 3p14.2  | 63007166 | 63053519 | 46354  | 0.70  | N | L |        |
| 770 | 3 | 3p14.2  | 63188660 | 63375121 | 186462 | 1.03  | N | C |        |
| 771 | 3 | 3p14.2  | 63402045 | 63490274 | 88230  | 0.08  | Y | L |        |
| 772 | 3 | 3p14.1  | 64399444 | 64412194 | 12751  | 0.06  | N | L |        |
| 773 | 3 | 3p14.1  | 64584274 | 64591622 | 7349   | 0.34  | N | L | 605421 |
| 774 | 3 | 3p14.1  | 64769004 | 64826664 | 57661  | 0.14  | N | L |        |
| 775 | 3 | 3p14.1  | 65026802 | 65046846 | 20045  | 0.11  | N | L |        |
| 776 | 3 | 3p14.1  | 65164865 | 65197934 | 33070  | 0.08  | Y | C |        |
| 777 | 3 | 3p14.1  | 65340763 | 65356485 | 15723  | 0.06  | N | L | 602625 |
| 778 | 3 | 3p14.1  | 67744860 | 67748136 | 3277   | 0.08  | N | L | 603922 |
| 779 | 3 | 3p14.1  | 68315727 | 68344336 | 28610  | 0.73  | Y | L |        |
| 780 | 3 | 3p14.1  | 68706600 | 68725339 | 18740  | 0.06  | Y | G |        |
| 781 | 3 | 3p14.1  | 68814714 | 68832771 | 18058  | 15.68 | Y | C |        |
| 782 | 3 | 3p14.1  | 69053524 | 69067060 | 13537  | 0.06  | N | L |        |
| 783 | 3 | 3p14.1  | 69300034 | 69308278 | 8245   | 0.06  | N | L |        |
| 784 | 3 | 3p14.1  | 70623164 | 70660914 | 37751  | 2.43  | N | L |        |
| 785 | 3 | 3p14.1  | 70896232 | 70992184 | 95953  | 0.95  | N | L |        |
| 786 | 3 | 3p13    | 72398646 | 72444156 | 45511  | 5.28  | N | L |        |
| 787 | 3 | 3p13    | 73458703 | 73471412 | 12710  | 0.06  | N | L |        |
| 788 | 3 | 3p12.3  | 74210792 | 74246999 | 36208  | 0.17  | Y | L |        |
| 789 | 3 | 3p12.3  | 74653740 | 74667295 | 13556  | 0.20  | N | L |        |
| 790 | 3 | 3p12.3  | 75490407 | 75506171 | 15765  | 0.11  | Y | C |        |
| 791 | 3 | 3p12.3  | 75630749 | 75669422 | 38674  | 0.17  | Y | L |        |
| 792 | 3 | 3p12.3  | 76071296 | 76117079 | 45784  | 2.35  | Y | L |        |
| 793 | 3 | 3p12.3  | 76180492 | 76190375 | 9884   | 0.06  | Y | L |        |
| 794 | 3 | 3p12.3  | 76280542 | 76329720 | 49179  | 0.11  | Y | L |        |
| 795 | 3 | 3p12.3  | 76486509 | 76503888 | 17380  | 0.06  | Y | L |        |
| 796 | 3 | 3p12.3  | 76872906 | 76922705 | 49800  | 5.90  | Y | L |        |
| 797 | 3 | 3p12.3  | 77638060 | 77707677 | 69618  | 0.36  | Y | L | 610878 |
| 798 | 3 | 3p12.3  | 78523614 | 78564839 | 41226  | 1.82  | Y | L |        |
| 799 | 3 | 3p12.3  | 79716163 | 79748065 | 31903  | 0.17  | Y | L | 602430 |
| 800 | 3 | 3p12.3  | 79779372 | 79827613 | 48242  | 0.64  | Y | L |        |
| 801 | 3 | 3p12.3  | 79976736 | 80032352 | 55617  | 0.45  | Y | L |        |
| 802 | 3 | 3p12.3  | 80577860 | 80638182 | 60323  | 0.11  | Y | C |        |

|     |   |               |           |           |        |      |   |   |        |        |                                         |
|-----|---|---------------|-----------|-----------|--------|------|---|---|--------|--------|-----------------------------------------|
| 803 | 3 | 3p12.3        | 81642190  | 81698416  | 56227  | 0.17 | N | L | 607839 | 607839 | Glycogen storage disease IV, 232500 (3) |
| 804 | 3 | 3p12.3-3p12.2 | 81799731  | 82227877  | 428147 | 0.53 | Y | L | 607839 | 607839 | Glycogen storage disease IV, 232500 (3) |
| 805 | 3 | 3p12.2        | 82473190  | 82504954  | 31765  | 0.70 | N | L |        |        |                                         |
| 806 | 3 | 3p12.2        | 82881651  | 82897332  | 15682  | 0.06 | N | L |        |        |                                         |
| 807 | 3 | 3p12.2        | 83114143  | 83182109  | 67967  | 1.87 | N | L |        |        |                                         |
| 808 | 3 | 3p12.2        | 83217377  | 83307669  | 90293  | 2.29 | Y | L |        |        |                                         |
| 809 | 3 | 3p12.1        | 83791652  | 83862311  | 70660  | 1.26 | Y | L |        |        |                                         |
| 810 | 3 | 3p12.1        | 84188136  | 84229622  | 41487  | 0.11 | Y | L |        |        |                                         |
| 811 | 3 | 3p12.1        | 84527485  | 84565252  | 37768  | 0.17 | N | L |        |        |                                         |
| 812 | 3 | 3p12.1        | 84794251  | 84838653  | 44403  | 1.43 | N | C |        |        |                                         |
| 813 | 3 | 3p12.1        | 85169093  | 85470068  | 300976 | 0.25 | N | L |        |        |                                         |
| 814 | 3 | 3p12.1        | 85603747  | 85620801  | 17055  | 0.06 | N | L |        |        |                                         |
| 815 | 3 | 3p12.1        | 85941042  | 85972538  | 31497  | 0.45 | N | L | 609938 |        |                                         |
| 816 | 3 | 3p12.1        | 86071079  | 86115617  | 44539  | 1.59 | Y | L | 609938 |        |                                         |
| 817 | 3 | 3p12.1        | 86267166  | 86354380  | 87215  | 0.14 | N | L |        |        |                                         |
| 818 | 3 | 3p12.1        | 86434591  | 86498976  | 64386  | 0.28 | N | L |        |        |                                         |
| 819 | 3 | 3p12.1        | 86568961  | 86620324  | 51364  | 0.14 | Y | L |        |        |                                         |
| 820 | 3 | 3p12.1        | 86748218  | 86832990  | 84773  | 4.86 | Y | L |        |        |                                         |
| 821 | 3 | 3p11.2        | 88615106  | 88624466  | 9361   | 0.20 | N | L |        |        |                                         |
| 822 | 3 | 3p11.2        | 88834372  | 88859735  | 25364  | 0.11 | N | L |        |        |                                         |
| 823 | 3 | 3p11.2        | 88932726  | 88967619  | 34894  | 0.84 | N | L |        |        |                                         |
| 824 | 3 | 3p11.1        | 89477416  | 89508883  | 31468  | 1.01 | Y | L | 179611 |        |                                         |
| 825 | 3 | 3p11.1        | 89601022  | 89627465  | 26444  | 0.22 | Y | L | 179611 |        |                                         |
| 826 | 3 | 3p11.1        | 89705467  | 89787083  | 81617  | 1.62 | Y | L |        |        |                                         |
| 827 | 3 | 3p11.1        | 90425249  | 90585521  | 160273 | 0.67 | Y | L |        |        |                                         |
| 828 | 3 | 3q11.2        | 95493508  | 95513359  | 19852  | 0.11 | N | L |        |        |                                         |
| 829 | 3 | 3q11.2        | 95970125  | 96024041  | 53917  | 0.45 | N | L |        |        |                                         |
| 830 | 3 | 3q11.2        | 96586271  | 96659102  | 72832  | 0.17 | Y | L |        |        |                                         |
| 831 | 3 | 3q11.2        | 96667180  | 96708452  | 41273  | 0.08 | Y | L |        |        |                                         |
| 832 | 3 | 3q11.2        | 96754710  | 96769496  | 14787  | 0.08 | Y | L |        |        |                                         |
| 833 | 3 | 3q11.2        | 96926755  | 96960281  | 33527  | 2.32 | N | L |        |        |                                         |
| 834 | 3 | 3q11.2        | 98034621  | 98076362  | 41742  | 0.17 | N | L | 600066 |        |                                         |
| 835 | 3 | 3q11.2        | 98282700  | 98339317  | 56618  | 0.22 | N | L | 600066 |        |                                         |
| 836 | 3 | 3q11.2        | 98915273  | 98971266  | 55994  | 0.14 | N | L | 600066 |        |                                         |
| 837 | 3 | 3q11.2        | 99122000  | 99142796  | 20797  | 0.45 | N | L |        |        |                                         |
| 838 | 3 | 3q11.2        | 99261527  | 99274000  | 12474  | 0.17 | N | L |        |        |                                         |
| 839 | 3 | 3q11.2        | 99345928  | 99424432  | 78505  | 2.07 | Y | L |        |        |                                         |
| 840 | 3 | 3q12.1        | 100278842 | 100337759 | 58918  | 1.98 | N | L |        |        |                                         |
| 841 | 3 | 3q12.1        | 100383565 | 100444176 | 60612  | 0.64 | Y | C |        |        |                                         |
| 842 | 3 | 3q12.1        | 100542280 | 100561401 | 19122  | 0.06 | N | L |        |        |                                         |
| 843 | 3 | 3q12.1        | 100566127 | 100595918 | 29792  | 0.08 | N | L |        |        |                                         |
| 844 | 3 | 3q12.1        | 101097316 | 101195742 | 98427  | 0.14 | N | L | 612993 |        |                                         |
| 845 | 3 | 3q12.2        | 102001340 | 102024705 | 23366  | 0.06 | Y | L | 606279 |        |                                         |
| 846 | 3 | 3q12.2        | 102321608 | 102351719 | 30112  | 0.95 | N | L |        |        |                                         |
| 847 | 3 | 3q12.3        | 102514446 | 102552542 | 38097  | 0.11 | N | L | 607056 |        |                                         |
| 848 | 3 | 3q12.3        | 103127475 | 103143770 | 16296  | 0.08 | N | L |        |        |                                         |
| 849 | 3 | 3q12.3        | 103502964 | 103548851 | 45888  | 1.45 | N | L |        |        |                                         |
| 850 | 3 | 3q12.3        | 103597698 | 103640730 | 43033  | 0.06 | N | L |        |        |                                         |
| 851 | 3 | 3q12.3        | 103816364 | 103853845 | 37482  | 1.20 | N | L |        |        |                                         |
| 852 | 3 | 3q12.3        | 103966547 | 104005919 | 39373  | 0.28 | Y | L |        |        |                                         |
| 853 | 3 | 3q12.3        | 104064650 | 104083649 | 19000  | 0.08 | N | L |        |        |                                         |
| 854 | 3 | 3q12.3        | 104176673 | 104204085 | 27413  | 0.08 | N | L |        |        |                                         |
| 855 | 3 | 3q13.11       | 104562118 | 104601097 | 38980  | 0.08 | N | L |        |        |                                         |
| 856 | 3 | 3q13.11       | 104815755 | 104908550 | 92796  | 4.47 | Y | L |        |        |                                         |
| 857 | 3 | 3q13.11       | 105084468 | 105118459 | 33992  | 0.11 | N | L |        |        |                                         |
| 858 | 3 | 3q13.11       | 105444917 | 105499284 | 54368  | 0.50 | Y | L |        |        |                                         |
| 859 | 3 | 3q13.11       | 105859715 | 105863195 | 3481   | 0.06 | Y | L |        |        |                                         |
| 860 | 3 | 3q13.11       | 106440630 | 106487543 | 46914  | 2.10 | N | L |        |        |                                         |
| 861 | 3 | 3q13.11       | 106737399 | 106759163 | 21765  | 0.98 | Y | L | 601662 |        |                                         |
| 862 | 3 | 3q13.12       | 108522151 | 108541672 | 19522  | 0.22 | Y | C |        |        |                                         |
| 863 | 3 | 3q13.12       | 109183134 | 109249291 | 66158  | 0.39 | Y | C | 601028 |        |                                         |
| 864 | 3 | 3q13.12       | 109367743 | 109403478 | 35736  | 0.70 | N | L | 606621 |        |                                         |
| 865 | 3 | 3q13.12       | 109482493 | 109496385 | 13893  | 0.08 | N | L |        |        |                                         |
| 866 | 3 | 3q13.13       | 111044877 | 111101036 | 56160  | 0.36 | N | L |        |        |                                         |
| 867 | 3 | 3q13.13       | 111135261 | 111179332 | 44072  | 0.08 | Y | C |        |        |                                         |
| 868 | 3 | 3q13.13       | 111669301 | 111685098 | 15798  | 0.25 | N | L |        |        |                                         |
| 869 | 3 | 3q13.13       | 111746069 | 111759041 | 12973  | 0.11 | Y | L |        |        |                                         |
| 870 | 3 | 3q13.13       | 112054669 | 112078092 | 23424  | 0.08 | N | L |        |        |                                         |
| 871 | 3 | 3q13.13       | 112568433 | 112619699 | 51267  | 0.48 | N | L |        |        |                                         |
| 872 | 3 | 3q13.13       | 112717227 | 112737449 | 20223  | 0.64 | Y | L |        |        |                                         |

|     |   |         |           |           |        |       |   |   |        |        |                                              |
|-----|---|---------|-----------|-----------|--------|-------|---|---|--------|--------|----------------------------------------------|
| 873 | 3 | 3q13.2  | 113443059 | 113454180 | 11122  | 0.81  | Y | L | 612738 |        |                                              |
| 874 | 3 | 3q13.2  | 113461350 | 113474906 | 13557  | 0.61  | Y | L | 612738 |        |                                              |
| 875 | 3 | 3q13.31 | 115596785 | 115633024 | 36240  | 0.17  | N | L | 606025 |        |                                              |
| 876 | 3 | 3q13.31 | 116184747 | 116243746 | 59000  | 3.07  | N | L | 606025 |        |                                              |
| 877 | 3 | 3q13.31 | 116555378 | 116574629 | 19252  | 0.22  | N | L |        |        |                                              |
| 878 | 3 | 3q13.31 | 116627185 | 116640412 | 13228  | 0.06  | N | L |        |        |                                              |
| 879 | 3 | 3q13.31 | 116668619 | 116710731 | 42113  | 0.14  | N | L |        |        |                                              |
| 880 | 3 | 3q13.31 | 117065052 | 117102887 | 37836  | 0.20  | N | C | 603241 |        |                                              |
| 881 | 3 | 3q13.31 | 117157841 | 117189253 | 31413  | 0.11  | N | L | 603241 |        |                                              |
| 882 | 3 | 3q13.31 | 117383722 | 117385591 | 1870   | 0.11  | Y | L | 603241 |        |                                              |
| 883 | 3 | 3q13.31 | 117923129 | 117928301 | 5173   | 0.20  | Y | L |        |        |                                              |
| 884 | 3 | 3q13.31 | 117978012 | 118231546 | 253535 | 0.95  | Y | L |        |        |                                              |
| 885 | 3 | 3q13.31 | 118324548 | 118341685 | 17138  | 0.11  | N | L |        |        |                                              |
| 886 | 3 | 3q13.32 | 118921173 | 118955361 | 34189  | 0.20  | N | L |        |        |                                              |
| 887 | 3 | 3q13.32 | 119292396 | 119322195 | 29800  | 0.06  | N | L |        |        |                                              |
| 888 | 3 | 3q13.32 | 119635780 | 119682587 | 46808  | 0.84  | N | L |        |        |                                              |
| 889 | 3 | 3q13.33 | 120896377 | 120908997 | 12621  | 0.11  | N | L | 609910 |        |                                              |
| 890 | 3 | 3q13.33 | 122006895 | 122025639 | 18745  | 0.08  | N | L |        |        |                                              |
| 891 | 3 | 3q13.33 | 123119868 | 123127716 | 7849   | 0.06  | Y | G | 602339 |        |                                              |
| 892 | 3 | 3q21.2  | 125461164 | 125482366 | 21203  | 0.22  | N | L | 604605 |        |                                              |
| 893 | 3 | 3q21.2  | 126947906 | 126955676 | 7771   | 1.17  | N | L |        |        |                                              |
| 894 | 3 | 3q21.3  | 130112421 | 130159788 | 47368  | 2.35  | N | L | 611126 |        |                                              |
| 895 | 3 | 3q21.3  | 131242188 | 131288997 | 46810  | 3.16  | Y | L |        |        |                                              |
| 896 | 3 | 3q22.1  | 131617266 | 131671990 | 54725  | 0.78  | Y | L | 611916 |        |                                              |
| 897 | 3 | 3q22.1  | 132968592 | 132987956 | 19365  | 0.06  | Y | L | 604208 |        |                                              |
| 898 | 3 | 3q22.1  | 133190681 | 133206721 | 16041  | 0.08  | Y | L | 604208 |        |                                              |
| 899 | 3 | 3q22.1  | 134125561 | 134155358 | 29798  | 0.31  | N | L |        |        |                                              |
| 900 | 3 | 3q22.3  | 138325045 | 138359539 | 34495  | 0.59  | N | L |        |        |                                              |
| 901 | 3 | 3q22.3  | 138525925 | 138571989 | 46065  | 0.34  | Y | L |        |        |                                              |
| 902 | 3 | 3q22.3  | 138638963 | 138641869 | 2907   | 0.11  | N | C |        |        |                                              |
| 903 | 3 | 3q23    | 141091188 | 141134564 | 43377  | 0.08  | Y | L |        |        |                                              |
| 904 | 3 | 3q23    | 141960197 | 141976117 | 15921  | 0.78  | Y | L |        |        |                                              |
| 905 | 3 | 3q23    | 142018984 | 142029169 | 10186  | 0.08  | Y | L |        |        |                                              |
| 906 | 3 | 3q23    | 143089754 | 143115385 | 25632  | 0.08  | N | L | 601867 |        |                                              |
| 907 | 3 | 3q23    | 143336409 | 143353625 | 17217  | 0.06  | Y | L |        |        |                                              |
| 908 | 3 | 3q24    | 145132682 | 145163334 | 30653  | 0.34  | N | L |        |        |                                              |
| 909 | 3 | 3q24    | 145253342 | 145342599 | 89258  | 0.08  | N | L |        |        |                                              |
| 910 | 3 | 3q24    | 145414533 | 145523082 | 108550 | 3.52  | N | L |        |        |                                              |
| 911 | 3 | 3q24    | 145723851 | 145742111 | 18261  | 0.06  | Y | L |        |        |                                              |
| 912 | 3 | 3q24    | 146264012 | 146418161 | 154150 | 0.06  | Y | L |        |        |                                              |
| 913 | 3 | 3q24    | 146493435 | 147070256 | 576822 | 0.20  | Y | L |        |        |                                              |
| 914 | 3 | 3q24    | 147108904 | 147204177 | 95274  | 0.08  | Y | L |        |        |                                              |
| 915 | 3 | 3q24    | 147423652 | 147445424 | 21773  | 0.06  | N | L | 607612 |        |                                              |
| 916 | 3 | 3q24    | 148250076 | 148323405 | 73330  | 0.73  | N | L |        |        |                                              |
| 917 | 3 | 3q24    | 148844081 | 148983039 | 138959 | 1.70  | N | L |        |        |                                              |
| 918 | 3 | 3q24    | 149228235 | 149242934 | 14700  | 0.11  | N | L |        |        |                                              |
| 919 | 3 | 3q24    | 149312152 | 149336866 | 24715  | 0.64  | N | L |        |        |                                              |
| 920 | 3 | 3q24    | 149379516 | 149460926 | 81411  | 0.81  | N | L |        |        |                                              |
| 921 | 3 | 3q24    | 149536972 | 149579681 | 42710  | 0.08  | N | L |        |        |                                              |
| 922 | 3 | 3q24    | 149740788 | 149775001 | 34214  | 0.08  | Y | L |        |        |                                              |
| 923 | 3 | 3q25.1  | 150446085 | 150456991 | 10907  | 2.10  | Y | L |        |        |                                              |
| 924 | 3 | 3q25.1  | 152673171 | 152696437 | 23267  | 0.06  | Y | L |        |        |                                              |
| 925 | 3 | 3q25.2  | 154798356 | 154826908 | 28553  | 0.11  | N | L |        |        |                                              |
| 926 | 3 | 3q25.2  | 155212927 | 155225859 | 12933  | 0.06  | N | L |        |        |                                              |
| 927 | 3 | 3q25.2  | 155738803 | 155771307 | 32505  | 0.08  | Y | L |        |        |                                              |
| 928 | 3 | 3q25.31 | 156345084 | 156384950 | 39867  | 0.34  | N | L | 120520 | 120520 | Membranous glomerulonephritis, antenatal (1) |
| 929 | 3 | 3q25.31 | 156549458 | 156575330 | 25873  | 0.06  | N | L |        |        |                                              |
| 930 | 3 | 3q25.32 | 159608976 | 159652271 | 43296  | 0.36  | N | L |        |        |                                              |
| 931 | 3 | 3q25.33 | 160260786 | 160263803 | 3018   | 0.06  | Y | C |        |        |                                              |
| 932 | 3 | 3q25.33 | 160800081 | 160828965 | 28885  | 0.06  | N | L | 611622 |        |                                              |
| 933 | 3 | 3q26.1  | 161835262 | 161841503 | 6242   | 0.34  | Y | L |        |        |                                              |
| 934 | 3 | 3q26.1  | 162932835 | 162972574 | 39740  | 0.14  | Y | L |        |        |                                              |
| 935 | 3 | 3q26.1  | 163023862 | 163041832 | 17971  | 0.25  | Y | L |        |        |                                              |
| 936 | 3 | 3q26.1  | 163191630 | 163252813 | 61184  | 3.33  | Y | L |        |        |                                              |
| 937 | 3 | 3q26.1  | 163283763 | 163302313 | 18551  | 0.28  | Y | L |        |        |                                              |
| 938 | 3 | 3q26.1  | 163333205 | 163354213 | 21009  | 0.89  | Y | L |        |        |                                              |
| 939 | 3 | 3q26.1  | 163690967 | 163719822 | 28856  | 5.14  | Y | L |        |        |                                              |
| 940 | 3 | 3q26.1  | 163972160 | 163978315 | 6156   | 0.84  | Y | L |        |        |                                              |
| 941 | 3 | 3q26.1  | 163995380 | 164135788 | 140409 | 30.86 | Y | C |        |        |                                              |
| 942 | 3 | 3q26.1  | 164226314 | 164240379 | 14066  | 0.67  | Y | L |        |        |                                              |
| 943 | 3 | 3q26.1  | 164340331 | 164428528 | 88198  | 0.87  | Y | L |        |        |                                              |
| 944 | 3 | 3q26.1  | 164925713 | 164936182 | 10470  | 0.08  | Y | G |        |        |                                              |

|      |   |         |           |           |        |       |   |   |        |        |                                |
|------|---|---------|-----------|-----------|--------|-------|---|---|--------|--------|--------------------------------|
| 945  | 3 | 3q26.1  | 165177674 | 165197907 | 20234  | 0.14  | Y | L |        |        |                                |
| 946  | 3 | 3q26.1  | 165220448 | 165299346 | 78899  | 2.77  | Y | L |        |        |                                |
| 947  | 3 | 3q26.1  | 165318087 | 165319506 | 1420   | 0.08  | Y | L |        |        |                                |
| 948  | 3 | 3q26.1  | 165730724 | 165757755 | 27032  | 0.11  | Y | L |        |        |                                |
| 949  | 3 | 3q26.1  | 165949371 | 165998004 | 48634  | 0.25  | N | L |        |        |                                |
| 950  | 3 | 3q26.1  | 167345255 | 167387049 | 41795  | 0.34  | Y | L |        |        |                                |
| 951  | 3 | 3q26.1  | 167413486 | 167953154 | 539669 | 0.56  | Y | L |        |        |                                |
| 952  | 3 | 3q26.1  | 169085611 | 169180273 | 94663  | 0.75  | Y | L |        |        |                                |
| 953  | 3 | 3q26.2  | 170128654 | 170154427 | 25774  | 0.06  | N | G |        |        |                                |
| 954  | 3 | 3q26.2  | 170156026 | 170221398 | 65373  | 1.87  | N | L |        |        |                                |
| 955  | 3 | 3q26.2  | 170554380 | 170586989 | 32610  | 0.17  | N | L |        |        |                                |
| 956  | 3 | 3q26.2  | 170821852 | 170835519 | 13668  | 0.28  | N | C |        |        |                                |
| 957  | 3 | 3q26.31 | 174924370 | 174970869 | 46500  | 0.31  | Y | L | 600568 |        |                                |
| 958  | 3 | 3q26.31 | 175472945 | 175495059 | 22115  | 0.17  | N | L | 600568 |        |                                |
| 959  | 3 | 3q26.31 | 175515979 | 175545686 | 29708  | 0.28  | N | L |        |        |                                |
| 960  | 3 | 3q26.31 | 176202099 | 176253358 | 51260  | 0.81  | Y | L | 608806 |        |                                |
| 961  | 3 | 3q26.31 | 176309049 | 176345025 | 35977  | 0.17  | Y | L | 608806 |        |                                |
| 962  | 3 | 3q26.31 | 177146513 | 177182764 | 36252  | 0.17  | Y | L |        |        |                                |
| 963  | 3 | 3q26.31 | 177204250 | 177271328 | 67079  | 0.25  | N | L |        |        |                                |
| 964  | 3 | 3q26.32 | 177445450 | 177469973 | 24524  | 0.06  | Y | L |        |        |                                |
| 965  | 3 | 3q26.32 | 177489605 | 177519564 | 29960  | 0.11  | Y | L |        |        |                                |
| 966  | 3 | 3q26.32 | 179413464 | 179472620 | 59157  | 0.81  | N | L |        |        |                                |
| 967  | 3 | 3q26.32 | 180006762 | 180036564 | 29803  | 5.17  | Y | L | 605214 |        |                                |
| 968  | 3 | 3q26.33 | 181548506 | 181604126 | 55621  | 0.14  | N | L |        |        |                                |
| 969  | 3 | 3q27.1  | 184835028 | 184861214 | 26187  | 0.25  | N | L | 611295 |        |                                |
| 970  | 3 | 3q27.2  | 187168878 | 187190085 | 21208  | 0.36  | N | C |        |        |                                |
| 971  | 3 | 3q27.3  | 189069534 | 189089575 | 20042  | 0.11  | Y | G |        |        |                                |
| 972  | 3 | 3q28    | 190836794 | 190859084 | 22291  | 0.06  | Y | L | 605289 |        |                                |
| 973  | 3 | 3q28    | 191556515 | 191579247 | 22733  | 0.20  | N | L |        |        |                                |
| 974  | 3 | 3q28    | 191883457 | 191920066 | 36610  | 0.17  | Y | L |        |        |                                |
| 975  | 3 | 3q28    | 193174688 | 193182291 | 7604   | 0.06  | N | L |        |        |                                |
| 976  | 3 | 3q28    | 193422711 | 193470593 | 47883  | 0.25  | Y | L | 601513 |        |                                |
| 977  | 3 | 3q29    | 194358875 | 194365571 | 6697   | 19.42 | Y | G |        |        |                                |
| 978  | 3 | 3q29    | 194629750 | 194635606 | 5857   | 0.14  | Y | C | 609556 |        |                                |
| 979  | 3 | 3q29    | 194772910 | 194821274 | 48365  | 0.06  | Y | L | 605290 | 605290 | Optic atrophy 1,<br>165500 (3) |
| 980  | 3 | 3q29    | 195170731 | 195206318 | 35588  | 0.06  | N | L |        |        |                                |
| 981  | 3 | 3q29    | 195861808 | 195862969 | 1162   | 0.08  | N | G | 610780 |        |                                |
| 982  | 3 | 3q29    | 196001316 | 196263683 | 262368 | 0.17  | Y | L |        |        |                                |
| 983  | 3 | 3q29    | 196654879 | 196961756 | 306878 | 2.07  | Y | C | 601792 |        |                                |
| 984  | 3 | 3q29    | 197163235 | 197203162 | 39928  | 0.14  | Y | L |        |        |                                |
| 985  | 3 | 3q29    | 197540547 | 197599890 | 59344  | 0.31  | Y | G |        |        |                                |
| 986  | 3 | 3q29    | 199272331 | 199305841 | 33511  | 0.06  | Y | G |        |        |                                |
| 987  | 4 | 4p16.3  | 344812    | 384586    | 39775  | 0.08  | Y | L | 194648 |        |                                |
| 988  | 4 | 4p16.3  | 2593432   | 2595295   | 1864   | 0.06  | N | C |        |        |                                |
| 989  | 4 | 4p16.2  | 4146350   | 4205636   | 59287  | 1.82  | Y | C |        |        |                                |
| 990  | 4 | 4p16.2  | 4210964   | 4218034   | 7071   | 0.06  | Y | L |        |        |                                |
| 991  | 4 | 4p16.1  | 5253703   | 5352394   | 98692  | 0.06  | Y | L |        |        |                                |
| 992  | 4 | 4p16.1  | 9067853   | 9088717   | 20865  | 0.20  | Y | L |        |        |                                |
| 993  | 4 | 4p16.1  | 9808071   | 9960046   | 151976 | 47.32 | Y | C |        |        |                                |
| 994  | 4 | 4p16.1  | 9990005   | 10016632  | 26628  | 2.04  | Y | L |        |        |                                |
| 995  | 4 | 4p16.1  | 10630344  | 10671295  | 40952  | 0.61  | Y | L |        |        |                                |
| 996  | 4 | 4p15.33 | 11450407  | 11451540  | 1134   | 0.11  | N | L |        |        |                                |
| 997  | 4 | 4p15.33 | 11694925  | 11797395  | 102471 | 0.25  | Y | L |        |        |                                |
| 998  | 4 | 4p15.33 | 12267772  | 12334594  | 66823  | 0.14  | Y | L |        |        |                                |
| 999  | 4 | 4p15.33 | 13499962  | 13532685  | 32724  | 0.31  | N | L |        |        |                                |
| 1000 | 4 | 4p15.33 | 13701451  | 13714161  | 12711  | 0.06  | Y | L |        |        |                                |
| 1001 | 4 | 4p15.33 | 13982575  | 14007425  | 24851  | 0.39  | N | L |        |        |                                |
| 1002 | 4 | 4p15.33 | 14391155  | 14412778  | 21624  | 0.48  | N | L |        |        |                                |
| 1003 | 4 | 4p15.33 | 14476780  | 14483474  | 6695   | 0.08  | N | L |        |        |                                |
| 1004 | 4 | 4p15.32 | 17153735  | 17176611  | 22877  | 0.22  | Y | L |        |        |                                |
| 1005 | 4 | 4p15.32 | 17975564  | 18003629  | 28066  | 0.08  | N | L |        |        |                                |
| 1006 | 4 | 4p15.32 | 18097287  | 18134040  | 36754  | 0.11  | N | L |        |        |                                |
| 1007 | 4 | 4p15.32 | 18345647  | 18389690  | 44044  | 0.11  | N | L |        |        |                                |
| 1008 | 4 | 4p15.31 | 18529722  | 18532164  | 2443   | 0.20  | N | L |        |        |                                |
| 1009 | 4 | 4p15.31 | 18709227  | 18767905  | 58679  | 1.03  | Y | L |        |        |                                |
| 1010 | 4 | 4p15.31 | 18784520  | 18796009  | 11490  | 0.06  | Y | L |        |        |                                |
| 1011 | 4 | 4p15.31 | 19117006  | 19216491  | 99486  | 0.11  | N | L |        |        |                                |
| 1012 | 4 | 4p15.31 | 20459771  | 20482377  | 22607  | 0.14  | N | L | 608182 |        |                                |
| 1013 | 4 | 4p15.31 | 21119134  | 21175276  | 56143  | 0.42  | N | L | 608182 |        |                                |
| 1014 | 4 | 4p15.31 | 21183737  | 21209783  | 26047  | 0.06  | Y | L | 608182 |        |                                |
| 1015 | 4 | 4p15.31 | 21661042  | 21677771  | 16730  | 0.06  | Y | L |        |        |                                |
| 1016 | 4 | 4p15.31 | 22313071  | 22379973  | 66903  | 0.75  | Y | L | 606619 |        |                                |
| 1017 | 4 | 4p15.31 | 22890292  | 23098910  | 208619 | 1.23  | Y | L |        |        |                                |

|      |   |           |          |          |        |       |   |   |        |        |                                                   |  |  |
|------|---|-----------|----------|----------|--------|-------|---|---|--------|--------|---------------------------------------------------|--|--|
| 1018 | 4 | 4p15.2    | 25323324 | 25339644 | 16321  | 0.06  | Y | L |        |        |                                                   |  |  |
| 1019 | 4 | 4p15.2    | 26506156 | 26697283 | 191128 | 0.06  | Y | L | 610841 |        |                                                   |  |  |
| 1020 | 4 | 4p15.2    | 26811534 | 26947947 | 136414 | 1.54  | Y | L |        |        |                                                   |  |  |
| 1021 | 4 | 4p15.2    | 27018601 | 27086820 | 68220  | 0.73  | N | L |        |        |                                                   |  |  |
| 1022 | 4 | 4p15.2    | 27518511 | 27533957 | 15447  | 0.08  | N | L |        |        |                                                   |  |  |
| 1023 | 4 | 4p15.1    | 28257578 | 28331926 | 74349  | 0.84  | Y | L |        |        |                                                   |  |  |
| 1024 | 4 | 4p15.1    | 28743601 | 28760368 | 16768  | 0.14  | Y | L |        |        |                                                   |  |  |
| 1025 | 4 | 4p15.1    | 28883558 | 28948610 | 65053  | 1.03  | Y | L |        |        |                                                   |  |  |
| 1026 | 4 | 4p15.1    | 29167012 | 29195980 | 28969  | 1.03  | Y | L |        |        |                                                   |  |  |
| 1027 | 4 | 4p15.1    | 30182062 | 30208160 | 26099  | 0.20  | N | L |        |        |                                                   |  |  |
| 1028 | 4 | 4p15.1    | 31056586 | 31065050 | 8465   | 0.22  | N | L |        |        |                                                   |  |  |
| 1029 | 4 | 4p15.1    | 31387689 | 31417089 | 29401  | 0.08  | Y | L |        |        |                                                   |  |  |
| 1030 | 4 | 4p15.1    | 31885121 | 31903334 | 18214  | 0.39  | N | L |        |        |                                                   |  |  |
| 1031 | 4 | 4p15.1    | 31977637 | 32005941 | 28305  | 0.17  | N | L |        |        |                                                   |  |  |
| 1032 | 4 | 4p15.1    | 32149995 | 32199713 | 49719  | 0.20  | Y | L |        |        |                                                   |  |  |
| 1033 | 4 | 4p15.1    | 32657157 | 32673178 | 16022  | 0.06  | N | L |        |        |                                                   |  |  |
| 1034 | 4 | 4p15.1    | 33012498 | 33030479 | 17982  | 0.11  | Y | L |        |        |                                                   |  |  |
| 1035 | 4 | 4p15.1    | 33448781 | 33482019 | 33239  | 0.53  | N | L |        |        |                                                   |  |  |
| 1036 | 4 | 4p15.1    | 33576900 | 33612316 | 35417  | 0.89  | N | L |        |        |                                                   |  |  |
| 1037 | 4 | 4p15.1    | 34089261 | 34165385 | 76125  | 1.48  | Y | L |        |        |                                                   |  |  |
| 1038 | 4 | 4p15.1    | 34231727 | 34278777 | 47051  | 0.20  | N | L |        |        |                                                   |  |  |
| 1039 | 4 | 4p15.1    | 34463472 | 34508226 | 44755  | 6.82  | Y | L |        |        |                                                   |  |  |
| 1040 | 4 | 4p15.1    | 34687139 | 34718895 | 31757  | 0.08  | Y | L |        |        |                                                   |  |  |
| 1041 | 4 | 4p15.1    | 35092137 | 35120083 | 27947  | 0.14  | N | L |        |        |                                                   |  |  |
| 1042 | 4 | 4p15.1    | 35148264 | 35170540 | 22277  | 0.25  | Y | L |        |        |                                                   |  |  |
| 1043 | 4 | 4p15.1    | 35180860 | 35201105 | 20246  | 0.11  | Y | L |        |        |                                                   |  |  |
| 1044 | 4 | 4p15.1    | 35266235 | 35315380 | 49146  | 0.64  | N | L |        |        |                                                   |  |  |
| 1045 | 4 | 4p14      | 35591182 | 35607954 | 16773  | 0.20  | N | L |        |        |                                                   |  |  |
| 1046 | 4 | 4p14      | 35768528 | 35816468 | 47941  | 3.83  | Y | L | 606645 |        |                                                   |  |  |
| 1047 | 4 | 4p14      | 36196127 | 36264337 | 68211  | 0.14  | N | L |        |        |                                                   |  |  |
| 1048 | 4 | 4p14      | 38479458 | 38500147 | 20690  | 0.22  | N | L | 601194 | 601194 | {Leprosy,<br>protection against},<br>246300 (3)   |  |  |
| 1049 | 4 | 4p14      | 38573790 | 38828131 | 254342 | 0.08  | N | G | 608064 |        |                                                   |  |  |
| 1050 | 4 | 4p13      | 42439045 | 42446089 | 7045   | 0.08  | N | L |        |        |                                                   |  |  |
| 1051 | 4 | 4p13      | 42590472 | 42629877 | 39406  | 0.50  | Y | C |        |        |                                                   |  |  |
| 1052 | 4 | 4p13      | 42855653 | 42911451 | 55799  | 3.66  | Y | C |        |        |                                                   |  |  |
| 1053 | 4 | 4p13      | 43818244 | 43853575 | 35332  | 0.11  | N | L |        |        |                                                   |  |  |
| 1054 | 4 | 4p13      | 44437470 | 44451741 | 14272  | 0.08  | N | L |        |        |                                                   |  |  |
| 1055 | 4 | 4p13      | 44612797 | 44654817 | 42021  | 3.02  | Y | L |        |        |                                                   |  |  |
| 1056 | 4 | 4p12      | 45769102 | 45830834 | 61733  | 1.82  | N | L | 137166 |        |                                                   |  |  |
| 1057 | 4 | 4p12      | 45886253 | 45969347 | 83095  | 6.60  | Y | L | 137140 | 137140 | {Alcoholism,<br>susceptibility to},<br>103780 (3) |  |  |
| 1058 | 4 | 4p12      | 45991255 | 46039740 | 48486  | 0.06  | N | L | 137140 | 137140 | {Alcoholism,<br>susceptibility to},<br>103780 (3) |  |  |
| 1059 | 4 | 4p12      | 46188878 | 46253062 | 64185  | 0.11  | Y | L |        |        |                                                   |  |  |
| 1060 | 4 | 4p12      | 46631656 | 46675714 | 44059  | 0.73  | N | L | 137141 |        |                                                   |  |  |
| 1061 | 4 | 4p12      | 46839864 | 46874970 | 35107  | 0.48  | N | L | 137190 |        |                                                   |  |  |
| 1062 | 4 | 4p12-4p11 | 48682412 | 48864434 | 182023 | 15.87 | Y | C |        |        |                                                   |  |  |
| 1063 | 4 | 4p11      | 48964534 | 49010674 | 46141  | 1.98  | Y | C |        |        |                                                   |  |  |
| 1064 | 4 | 4p11      | 49214258 | 49353353 | 139096 | 0.17  | Y | L |        |        |                                                   |  |  |
| 1065 | 4 | 4q12      | 52806789 | 52863238 | 56450  | 0.61  | N | L |        |        |                                                   |  |  |
| 1066 | 4 | 4q12      | 53769138 | 53786240 | 17103  | 0.06  | Y | L |        |        |                                                   |  |  |
| 1067 | 4 | 4q12      | 57916405 | 57952406 | 36002  | 0.06  | Y | L |        |        |                                                   |  |  |
| 1068 | 4 | 4q12      | 58334018 | 58444913 | 110896 | 5.39  | Y | C |        |        |                                                   |  |  |
| 1069 | 4 | 4q13.1    | 59249164 | 59261597 | 12434  | 0.06  | N | L |        |        |                                                   |  |  |
| 1070 | 4 | 4q13.1    | 59502436 | 59509699 | 7264   | 0.06  | N | L |        |        |                                                   |  |  |
| 1071 | 4 | 4q13.1    | 59552659 | 59575119 | 22461  | 0.14  | N | L |        |        |                                                   |  |  |
| 1072 | 4 | 4q13.1    | 59645591 | 59704516 | 58926  | 1.87  | Y | L |        |        |                                                   |  |  |
| 1073 | 4 | 4q13.1    | 59723267 | 59725151 | 1885   | 0.06  | N | L |        |        |                                                   |  |  |
| 1074 | 4 | 4q13.1    | 59810334 | 59845362 | 35029  | 0.06  | N | L |        |        |                                                   |  |  |
| 1075 | 4 | 4q13.1    | 59952108 | 59992736 | 40629  | 0.22  | N | L |        |        |                                                   |  |  |
| 1076 | 4 | 4q13.1    | 60074380 | 60118888 | 44509  | 0.06  | N | L |        |        |                                                   |  |  |
| 1077 | 4 | 4q13.1    | 60247461 | 60278315 | 30855  | 0.06  | N | L |        |        |                                                   |  |  |
| 1078 | 4 | 4q13.1    | 60376241 | 60390306 | 14066  | 0.22  | N | L |        |        |                                                   |  |  |
| 1079 | 4 | 4q13.1    | 60693783 | 60724394 | 30612  | 0.06  | N | L |        |        |                                                   |  |  |
| 1080 | 4 | 4q13.1    | 61078573 | 61119445 | 40873  | 6.99  | N | C |        |        |                                                   |  |  |
| 1081 | 4 | 4q13.1    | 61612651 | 61649441 | 36791  | 0.31  | Y | L |        |        |                                                   |  |  |
| 1082 | 4 | 4q13.1    | 62765773 | 62787508 | 21736  | 0.22  | N | L |        |        |                                                   |  |  |
| 1083 | 4 | 4q13.1    | 63349753 | 63355937 | 6185   | 0.08  | Y | L |        |        |                                                   |  |  |
| 1084 | 4 | 4q13.1    | 63420217 | 63898361 | 478145 | 0.81  | Y | L |        |        |                                                   |  |  |
| 1085 | 4 | 4q13.1    | 63973283 | 64045574 | 72292  | 0.64  | N | L |        |        |                                                   |  |  |



|      |   |         |           |           |        |       |   |   |        |
|------|---|---------|-----------|-----------|--------|-------|---|---|--------|
| 1086 | 4 | 4q13.1  | 64195128  | 64220825  | 25698  | 0.11  | N | L |        |
| 1087 | 4 | 4q13.1  | 64374654  | 64400622  | 25969  | 2.15  | Y | C |        |
| 1088 | 4 | 4q13.1  | 64490032  | 64506707  | 16676  | 0.06  | N | L |        |
| 1089 | 4 | 4q13.1  | 64935223  | 64941447  | 6225   | 0.06  | N | L |        |
| 1090 | 4 | 4q13.1  | 65450725  | 65569422  | 118698 | 2.77  | Y | C |        |
| 1091 | 4 | 4q13.1  | 65584859  | 65620837  | 35979  | 0.06  | N | L |        |
| 1092 | 4 | 4q13.1  | 65640807  | 65687797  | 46991  | 1.43  | N | L |        |
| 1093 | 4 | 4q13.1  | 65850663  | 65908176  | 57514  | 0.87  | Y | L | 600004 |
| 1094 | 4 | 4q13.2  | 66503325  | 66519643  | 16319  | 0.06  | N | L |        |
| 1095 | 4 | 4q13.2  | 67172589  | 67194966  | 22378  | 1.06  | N | L |        |
| 1096 | 4 | 4q13.2  | 67653052  | 67667683  | 14632  | 0.06  | N | L |        |
| 1097 | 4 | 4q13.2  | 68064029  | 68081358  | 17330  | 0.17  | Y | L | 117141 |
| 1098 | 4 | 4q13.2  | 68942668  | 69633471  | 690804 | 31.27 | Y | C | 610399 |
| 1099 | 4 | 4q13.2  | 69656277  | 69774577  | 118301 | 0.59  | Y | L | 600070 |
| 1100 | 4 | 4q13.2  | 69817484  | 69931751  | 114268 | 4.70  | Y | L |        |
| 1101 | 4 | 4q13.2  | 70046910  | 70322446  | 275537 | 9.73  | Y | L | 603064 |
| 1102 | 4 | 4q13.2  | 70353187  | 70372914  | 19728  | 0.22  | Y | L |        |
| 1103 | 4 | 4q13.3  | 70429927  | 70436520  | 6594   | 0.45  | Y | L |        |
| 1104 | 4 | 4q13.3  | 71069746  | 71128036  | 58291  | 0.50  | Y | L | 607241 |
| 1105 | 4 | 4q13.3  | 71214520  | 71238447  | 23928  | 0.06  | N | L |        |
| 1106 | 4 | 4q13.3  | 71261271  | 71287190  | 25920  | 1.43  | Y | L | 611593 |
| 1107 | 4 | 4q13.3  | 72541637  | 72665062  | 123426 | 2.93  | N | L | 604278 |
| 1108 | 4 | 4q13.3  | 73134798  | 73154786  | 19989  | 0.06  | N | L | 607449 |
| 1109 | 4 | 4q13.3  | 73507979  | 73553195  | 45217  | 2.82  | N | L | 605011 |
| 1110 | 4 | 4q13.3  | 73748936  | 73783441  | 34506  | 0.08  | N | L |        |
| 1111 | 4 | 4q13.3  | 73880361  | 73920356  | 39996  | 1.48  | Y | L |        |
| 1112 | 4 | 4q13.3  | 73920664  | 73975913  | 55250  | 0.11  | Y | C |        |
| 1113 | 4 | 4q13.3  | 74972386  | 74981247  | 8862   | 0.14  | N | L |        |
| 1114 | 4 | 4q21.1  | 77250448  | 77281326  | 30879  | 0.06  | N | L | 603086 |
| 1115 | 4 | 4q21.1  | 78373548  | 78433110  | 59563  | 3.52  | N | L |        |
| 1116 | 4 | 4q21.1  | 78474212  | 78484723  | 10512  | 0.06  | Y | L |        |
| 1117 | 4 | 4q21.21 | 80578442  | 80599044  | 20603  | 0.06  | Y | L |        |
| 1118 | 4 | 4q21.21 | 80719444  | 80771827  | 52384  | 0.92  | N | L |        |
| 1119 | 4 | 4q21.21 | 80992348  | 81035374  | 43027  | 0.22  | N | L | 609717 |
| 1120 | 4 | 4q21.21 | 81718322  | 81901649  | 183328 | 0.08  | N | L |        |
| 1121 | 4 | 4q21.21 | 82122415  | 82144591  | 22177  | 0.06  | N | L |        |
| 1122 | 4 | 4q21.22 | 82926959  | 82954498  | 27540  | 0.11  | N | L |        |
| 1123 | 4 | 4q21.22 | 83802212  | 83816306  | 14095  | 0.08  | N | L | 608370 |
| 1124 | 4 | 4q21.23 | 84448921  | 84459871  | 10951  | 0.06  | N | L | 604724 |
| 1125 | 4 | 4q21.23 | 85140882  | 85207626  | 66745  | 2.21  | N | L |        |
| 1126 | 4 | 4q21.23 | 85502742  | 85570888  | 68147  | 0.45  | N | L |        |
| 1127 | 4 | 4q21.23 | 86320606  | 86343612  | 23007  | 0.22  | Y | L |        |
| 1128 | 4 | 4q22.1  | 90124495  | 90156207  | 31713  | 0.08  | Y | L |        |
| 1129 | 4 | 4q22.1  | 90510753  | 90560214  | 49462  | 0.08  | Y | L |        |
| 1130 | 4 | 4q22.1  | 91014304  | 91089363  | 75060  | 0.28  | Y | L | 601456 |
| 1131 | 4 | 4q22.1  | 91230712  | 91254818  | 24107  | 0.06  | Y | L |        |
| 1132 | 4 | 4q22.1  | 91412821  | 91432705  | 19885  | 0.11  | Y | L |        |
| 1133 | 4 | 4q22.1  | 92117961  | 92130071  | 12111  | 0.17  | Y | L |        |
| 1134 | 4 | 4q22.1  | 92430599  | 92463323  | 32725  | 1.17  | N | L |        |
| 1135 | 4 | 4q22.1  | 92671375  | 92723941  | 52567  | 0.17  | Y | L |        |
| 1136 | 4 | 4q22.1  | 93058480  | 93273674  | 215195 | 0.08  | Y | L |        |
| 1137 | 4 | 4q22.1  | 93747063  | 93847225  | 100163 | 0.31  | Y | L | 602368 |
| 1138 | 4 | 4q22.1  | 93926067  | 93970324  | 44258  | 0.42  | N | L | 602368 |
| 1139 | 4 | 4q22.2  | 94042075  | 94216391  | 174317 | 0.31  | Y | L | 602368 |
| 1140 | 4 | 4q22.2  | 94618886  | 94645560  | 26675  | 0.06  | N | L | 602368 |
| 1141 | 4 | 4q22.3  | 96040074  | 96050767  | 10694  | 0.14  | N | L | 609441 |
| 1142 | 4 | 4q22.3  | 96601069  | 96641612  | 40544  | 1.34  | N | L | 603610 |
| 1143 | 4 | 4q22.3  | 96799987  | 96818239  | 18253  | 0.11  | N | L |        |
| 1144 | 4 | 4q22.3  | 96848371  | 96854906  | 6536   | 0.06  | N | L |        |
| 1145 | 4 | 4q22.3  | 96953603  | 96954389  | 787    | 0.11  | N | L |        |
| 1146 | 4 | 4q22.3  | 97008998  | 97019707  | 10710  | 0.22  | Y | L |        |
| 1147 | 4 | 4q22.3  | 97154375  | 97184669  | 30295  | 0.36  | N | L |        |
| 1148 | 4 | 4q22.3  | 97387126  | 97400324  | 13199  | 0.06  | N | L |        |
| 1149 | 4 | 4q22.3  | 97917093  | 97940309  | 23217  | 0.08  | Y | L |        |
| 1150 | 4 | 4q22.3  | 98149278  | 98180317  | 31040  | 0.31  | N | L |        |
| 1151 | 4 | 4q22.3  | 98385644  | 98410500  | 24857  | 0.28  | Y | L |        |
| 1152 | 4 | 4q22.3  | 98420362  | 98447739  | 27378  | 0.06  | N | L |        |
| 1153 | 4 | 4q22.3  | 98503018  | 98544850  | 41833  | 0.34  | N | L |        |
| 1154 | 4 | 4q22.3  | 98628480  | 98665698  | 37219  | 0.64  | N | L |        |
| 1155 | 4 | 4q23    | 99125471  | 99143866  | 18396  | 0.14  | N | L |        |
| 1156 | 4 | 4q23    | 99178747  | 99198345  | 19599  | 0.11  | N | L |        |
| 1157 | 4 | 4q23    | 99256702  | 99279567  | 22866  | 0.11  | N | L |        |
| 1158 | 4 | 4q23    | 101382480 | 101416347 | 33868  | 0.06  | N | L |        |
| 1159 | 4 | 4q23    | 101656702 | 101681677 | 24976  | 0.28  | Y | L | 608350 |

|      |   |        |           |           |        |      |   |   |        |        |                                                             |  |
|------|---|--------|-----------|-----------|--------|------|---|---|--------|--------|-------------------------------------------------------------|--|
| 1160 | 4 | 4q23   | 102354963 | 102381029 | 26067  | 0.22 | N | L | 114105 |        |                                                             |  |
| 1161 | 4 | 4q24   | 103050308 | 103092559 | 42252  | 0.59 | Y | L | 610292 | 610292 | {Systemic lupus erythmatosus, association with}, 152700 (3) |  |
| 1162 | 4 | 4q24   | 103393455 | 103409509 | 16055  | 0.06 | N | L | 608732 |        |                                                             |  |
| 1163 | 4 | 4q24   | 103669197 | 103700596 | 31400  | 0.31 | N | L | 164011 |        |                                                             |  |
| 1164 | 4 | 4q24   | 105172424 | 105248940 | 76517  | 1.23 | N | L |        |        |                                                             |  |
| 1165 | 4 | 4q24   | 105523146 | 105575250 | 52105  | 0.08 | N | L |        |        |                                                             |  |
| 1166 | 4 | 4q24   | 105644478 | 105701695 | 57218  | 0.34 | N | L |        |        |                                                             |  |
| 1167 | 4 | 4q24   | 105962847 | 105978874 | 16028  | 0.31 | N | L |        |        |                                                             |  |
| 1168 | 4 | 4q24   | 107502105 | 107507485 | 5381   | 0.06 | Y | L |        |        |                                                             |  |
| 1169 | 4 | 4q25   | 107925031 | 107956947 | 31917  | 0.25 | Y | L |        |        |                                                             |  |
| 1170 | 4 | 4q25   | 108665139 | 108707307 | 42169  | 1.37 | Y | L |        |        |                                                             |  |
| 1171 | 4 | 4q25   | 110157527 | 110254949 | 97423  | 0.08 | N | L | 610004 |        |                                                             |  |
| 1172 | 4 | 4q25   | 112166181 | 112180033 | 13853  | 0.06 | N | L |        |        |                                                             |  |
| 1173 | 4 | 4q25   | 112537688 | 112644914 | 107227 | 4.36 | N | L |        |        |                                                             |  |
| 1174 | 4 | 4q26   | 115059888 | 115104989 | 45102  | 2.43 | N | L | 610010 |        |                                                             |  |
| 1175 | 4 | 4q26   | 115124927 | 115141272 | 16346  | 0.08 | N | L |        |        |                                                             |  |
| 1176 | 4 | 4q26   | 115386550 | 115420597 | 34048  | 4.53 | Y | C |        |        |                                                             |  |
| 1177 | 4 | 4q26   | 115623133 | 115648988 | 25856  | 0.25 | Y | L |        |        |                                                             |  |
| 1178 | 4 | 4q26   | 115941634 | 116002754 | 61121  | 0.08 | N | L |        |        |                                                             |  |
| 1179 | 4 | 4q26   | 116147641 | 116253769 | 106129 | 0.78 | Y | L |        |        |                                                             |  |
| 1180 | 4 | 4q26   | 116441466 | 116548004 | 106539 | 0.17 | Y | L |        |        |                                                             |  |
| 1181 | 4 | 4q26   | 116612698 | 116764414 | 151717 | 1.15 | Y | L |        |        |                                                             |  |
| 1182 | 4 | 4q26   | 117087575 | 117168468 | 80894  | 0.06 | Y | L |        |        |                                                             |  |
| 1183 | 4 | 4q26   | 117782208 | 117797646 | 15439  | 0.06 | Y | L |        |        |                                                             |  |
| 1184 | 4 | 4q26   | 117866567 | 117881936 | 15370  | 0.11 | Y | L |        |        |                                                             |  |
| 1185 | 4 | 4q26   | 118070795 | 118112513 | 41719  | 3.94 | Y | L |        |        |                                                             |  |
| 1186 | 4 | 4q26   | 118328555 | 118357066 | 28512  | 0.17 | N | L |        |        |                                                             |  |
| 1187 | 4 | 4q26   | 118477603 | 118833289 | 355687 | 0.67 | Y | L |        |        |                                                             |  |
| 1188 | 4 | 4q26   | 118882468 | 118895542 | 13075  | 0.11 | Y | L |        |        |                                                             |  |
| 1189 | 4 | 4q26   | 119229200 | 119242091 | 12892  | 0.06 | Y | L | 603950 |        |                                                             |  |
| 1190 | 4 | 4q26   | 120301317 | 120327925 | 26609  | 0.22 | N | L | 605602 |        |                                                             |  |
| 1191 | 4 | 4q26   | 120457516 | 120477655 | 20140  | 0.61 | N | L | 134640 |        |                                                             |  |
| 1192 | 4 | 4q27   | 120612321 | 120636470 | 24150  | 0.78 | N | L | 603310 |        |                                                             |  |
| 1193 | 4 | 4q27   | 121561900 | 121614619 | 52720  | 0.34 | N | L |        |        |                                                             |  |
| 1194 | 4 | 4q27   | 121701153 | 121706661 | 5509   | 0.06 | N | L |        |        |                                                             |  |
| 1195 | 4 | 4q27   | 122062017 | 122081149 | 19133  | 0.36 | N | L |        |        |                                                             |  |
| 1196 | 4 | 4q27   | 122417354 | 122446405 | 29052  | 0.06 | N | L |        |        |                                                             |  |
| 1197 | 4 | 4q27   | 122503398 | 122516387 | 12990  | 0.14 | Y | L | 606925 |        |                                                             |  |
| 1198 | 4 | 4q28.1 | 124240867 | 124250758 | 9892   | 0.06 | N | L |        |        |                                                             |  |
| 1199 | 4 | 4q28.1 | 125111781 | 125157952 | 46172  | 0.28 | Y | L |        |        |                                                             |  |
| 1200 | 4 | 4q28.1 | 125230058 | 125240475 | 10418  | 0.08 | Y | L |        |        |                                                             |  |
| 1201 | 4 | 4q28.1 | 125540876 | 125566164 | 25289  | 0.08 | Y | L |        |        |                                                             |  |
| 1202 | 4 | 4q28.1 | 126246805 | 126280219 | 33415  | 0.39 | N | L |        |        |                                                             |  |
| 1203 | 4 | 4q28.1 | 127044010 | 127084429 | 40420  | 0.17 | N | L |        |        |                                                             |  |
| 1204 | 4 | 4q28.1 | 127678695 | 127701785 | 23091  | 0.25 | N | L |        |        |                                                             |  |
| 1205 | 4 | 4q28.1 | 127920660 | 128057416 | 136757 | 0.36 | Y | C |        |        |                                                             |  |
| 1206 | 4 | 4q28.1 | 128239550 | 128358582 | 119033 | 2.91 | N | L |        |        |                                                             |  |
| 1207 | 4 | 4q28.2 | 130730048 | 130761084 | 31037  | 1.45 | Y | L |        |        |                                                             |  |
| 1208 | 4 | 4q28.2 | 130945112 | 130986341 | 41230  | 0.73 | N | L |        |        |                                                             |  |
| 1209 | 4 | 4q28.3 | 131347083 | 131402471 | 55389  | 0.56 | Y | L |        |        |                                                             |  |
| 1210 | 4 | 4q28.3 | 132234835 | 132250683 | 15849  | 0.11 | Y | L |        |        |                                                             |  |
| 1211 | 4 | 4q28.3 | 132599433 | 132620605 | 21173  | 0.25 | Y | L |        |        |                                                             |  |
| 1212 | 4 | 4q28.3 | 132867825 | 132883406 | 15582  | 0.06 | Y | L |        |        |                                                             |  |
| 1213 | 4 | 4q28.3 | 133604595 | 133642993 | 38399  | 0.45 | Y | L |        |        |                                                             |  |
| 1214 | 4 | 4q28.3 | 134022241 | 134045935 | 23695  | 0.06 | N | L |        |        |                                                             |  |
| 1215 | 4 | 4q28.3 | 134656601 | 134670035 | 13435  | 0.06 | N | L |        |        |                                                             |  |
| 1216 | 4 | 4q28.3 | 134896681 | 135369354 | 472674 | 0.25 | Y | L |        |        |                                                             |  |
| 1217 | 4 | 4q28.3 | 135539372 | 135557762 | 18391  | 0.28 | N | L |        |        |                                                             |  |
| 1218 | 4 | 4q28.3 | 135700084 | 135737590 | 37507  | 0.28 | Y | L |        |        |                                                             |  |
| 1219 | 4 | 4q28.3 | 135985219 | 136007282 | 22064  | 0.06 | Y | L |        |        |                                                             |  |
| 1220 | 4 | 4q28.3 | 136344567 | 136377690 | 33124  | 0.59 | N | L |        |        |                                                             |  |
| 1221 | 4 | 4q28.3 | 136768345 | 136825720 | 57376  | 0.06 | N | L |        |        |                                                             |  |
| 1222 | 4 | 4q28.3 | 136858700 | 136871469 | 12770  | 0.08 | N | L |        |        |                                                             |  |
| 1223 | 4 | 4q28.3 | 136917676 | 136938241 | 20566  | 0.17 | N | L |        |        |                                                             |  |
| 1224 | 4 | 4q28.3 | 136947955 | 136985582 | 37628  | 0.06 | N | L |        |        |                                                             |  |
| 1225 | 4 | 4q28.3 | 137262214 | 137272669 | 10456  | 0.11 | N | L |        |        |                                                             |  |
| 1226 | 4 | 4q28.3 | 137410390 | 137731533 | 321144 | 0.20 | Y | L |        |        |                                                             |  |
| 1227 | 4 | 4q28.3 | 138155017 | 138157815 | 2799   | 0.45 | N | L |        |        |                                                             |  |
| 1228 | 4 | 4q28.3 | 138308520 | 138314490 | 5971   | 0.11 | Y | L |        |        |                                                             |  |
| 1229 | 4 | 4q28.3 | 138341334 | 138394283 | 52950  | 0.06 | Y | L |        |        |                                                             |  |
| 1230 | 4 | 4q28.3 | 139294298 | 139352156 | 57859  | 0.36 | N | C | 607933 |        |                                                             |  |

|      |   |                 |           |           |        |      |   |   |        |        |                          |
|------|---|-----------------|-----------|-----------|--------|------|---|---|--------|--------|--------------------------|
| 1231 | 4 | 4q31.1          | 139566825 | 139584488 | 17664  | 0.06 | N | L |        |        |                          |
| 1232 | 4 | 4q31.21         | 142962623 | 142970176 | 7554   | 0.11 | Y | L |        |        |                          |
| 1233 | 4 | 4q31.21         | 143592527 | 143624532 | 32006  | 0.06 | N | L | 607494 |        |                          |
| 1234 | 4 | 4q31.21         | 144868189 | 144889903 | 21715  | 0.22 | Y | L |        |        |                          |
| 1235 | 4 | 4q31.22         | 145207013 | 145278555 | 71543  | 0.28 | Y | L | 111740 | 111740 | [Blood group, Ss]<br>(3) |
| 1236 | 4 | 4q31.22         | 145406892 | 145423848 | 16957  | 0.61 | N | L |        |        |                          |
| 1237 | 4 | 4q31.22         | 145487084 | 145523141 | 36058  | 0.17 | N | L |        |        |                          |
| 1238 | 4 | 4q31.22         | 145651670 | 145699790 | 48121  | 0.22 | N | L |        |        |                          |
| 1239 | 4 | 4q31.23         | 147978353 | 148044314 | 65962  | 0.06 | N | L |        |        |                          |
| 1240 | 4 | 4q31.23         | 148562786 | 148605757 | 42972  | 0.06 | N | L |        |        |                          |
| 1241 | 4 | 4q31.23         | 150078825 | 150168776 | 89952  | 1.26 | N | L |        |        |                          |
| 1242 | 4 | 4q31.23         | 150303874 | 150444728 | 140855 | 2.29 | N | L |        |        |                          |
| 1243 | 4 | 4q31.23         | 150525467 | 150536521 | 11055  | 0.08 | N | L |        |        |                          |
| 1244 | 4 | 4q31.23         | 150568639 | 150587587 | 18949  | 0.06 | N | L |        |        |                          |
| 1245 | 4 | 4q31.23         | 150706788 | 150727991 | 21204  | 0.28 | N | L |        |        |                          |
| 1246 | 4 | 4q31.23         | 150823237 | 150852115 | 28879  | 0.11 | N | L |        |        |                          |
| 1247 | 4 | 4q31.3          | 151390829 | 151400050 | 9222   | 0.06 | Y | C |        |        |                          |
| 1248 | 4 | 4q31.3          | 152640452 | 152674468 | 34017  | 0.11 | N | L |        |        |                          |
| 1249 | 4 | 4q31.3          | 153010983 | 153014150 | 3168   | 0.31 | Y | L |        |        |                          |
| 1250 | 4 | 4q31.3          | 155026774 | 155057884 | 31111  | 0.08 | N | L |        |        |                          |
| 1251 | 4 | 4q32.1          | 156364443 | 156463836 | 99394  | 1.37 | Y | L |        |        |                          |
| 1252 | 4 | 4q32.1          | 156858624 | 156889343 | 30720  | 0.17 | N | L | 139396 |        |                          |
| 1253 | 4 | 4q32.1          | 157079841 | 157090269 | 10429  | 0.06 | Y | L | 600550 |        |                          |
| 1254 | 4 | 4q32.1          | 157754977 | 157776466 | 21490  | 0.28 | N | L |        |        |                          |
| 1255 | 4 | 4q32.1          | 158382267 | 158430048 | 47782  | 0.08 | Y | L | 138247 |        |                          |
| 1256 | 4 | 4q32.1          | 158564742 | 158598317 | 33576  | 0.17 | Y | L |        |        |                          |
| 1257 | 4 | 4q32.1          | 158685003 | 158704154 | 19152  | 0.06 | N | L |        |        |                          |
| 1258 | 4 | 4q32.1          | 158787122 | 158812898 | 25777  | 0.53 | Y | L |        |        |                          |
| 1259 | 4 | 4q32.1          | 158877529 | 158938763 | 61235  | 0.06 | N | L |        |        |                          |
| 1260 | 4 | 4q32.1          | 160598857 | 160601565 | 2709   | 0.14 | N | L |        |        |                          |
| 1261 | 4 | 4q32.2          | 161663954 | 161799173 | 135220 | 1.17 | Y | C |        |        |                          |
| 1262 | 4 | 4q32.2          | 161829241 | 161849882 | 20642  | 0.08 | N | L |        |        |                          |
| 1263 | 4 | 4q32.2          | 162084190 | 162147951 | 63762  | 3.86 | Y | G |        |        |                          |
| 1264 | 4 | 4q32.2          | 162172344 | 162184642 | 12299  | 0.11 | Y | L |        |        |                          |
| 1265 | 4 | 4q32.2          | 162365113 | 162378929 | 13817  | 0.11 | Y | L |        |        |                          |
| 1266 | 4 | 4q32.2          | 163033125 | 163098344 | 65220  | 0.06 | Y | L |        |        |                          |
| 1267 | 4 | 4q32.2          | 163543337 | 163554990 | 11654  | 0.06 | N | L |        |        |                          |
| 1268 | 4 | 4q32.2          | 164031702 | 164046298 | 14597  | 0.67 | N | C |        |        |                          |
| 1269 | 4 | 4q32.3          | 164507988 | 164517724 | 9737   | 0.11 | N | L |        |        |                          |
| 1270 | 4 | 4q32.3          | 164790031 | 164807723 | 17693  | 0.06 | N | L |        |        |                          |
| 1271 | 4 | 4q32.3          | 164958251 | 165006843 | 48593  | 0.25 | N | G |        |        |                          |
| 1272 | 4 | 4q32.3          | 165299826 | 165326026 | 26201  | 0.25 | N | L |        |        |                          |
| 1273 | 4 | 4q32.3          | 165420859 | 165437927 | 17069  | 0.11 | Y | L |        |        |                          |
| 1274 | 4 | 4q32.3          | 166554082 | 166568983 | 14902  | 1.31 | Y | L | 114855 |        |                          |
| 1275 | 4 | 4q32.3          | 167124262 | 167158521 | 34260  | 0.17 | Y | L | 606742 |        |                          |
| 1276 | 4 | 4q32.3          | 167200417 | 167269079 | 68663  | 0.50 | Y | L | 606742 |        |                          |
| 1277 | 4 | 4q32.3          | 167501504 | 167549390 | 47887  | 0.06 | N | L |        |        |                          |
| 1278 | 4 | 4q32.3          | 168218069 | 168247068 | 29000  | 0.17 | Y | L | 607989 |        |                          |
| 1279 | 4 | 4q32.3          | 168902950 | 168937283 | 34334  | 0.64 | N | L |        |        |                          |
| 1280 | 4 | 4q33            | 171821698 | 171842063 | 20366  | 0.25 | N | L |        |        |                          |
| 1281 | 4 | 4q33-<br>4q34.1 | 171852404 | 172368927 | 516524 | 0.34 | N | L |        |        |                          |
| 1282 | 4 | 4q34.1          | 172396528 | 172443390 | 46863  | 0.73 | N | L |        |        |                          |
| 1283 | 4 | 4q34.1          | 172894449 | 173121936 | 227488 | 0.14 | Y | L |        |        |                          |
| 1284 | 4 | 4q34.1          | 173163780 | 173238621 | 74842  | 0.70 | Y | L |        |        |                          |
| 1285 | 4 | 4q34.1          | 175296912 | 175311101 | 14190  | 1.06 | N | L |        |        |                          |
| 1286 | 4 | 4q34.1          | 175684538 | 175711470 | 26933  | 0.25 | N | L |        |        |                          |
| 1287 | 4 | 4q34.3          | 179106364 | 179159737 | 53374  | 0.81 | Y | L |        |        |                          |
| 1288 | 4 | 4q34.3          | 179475712 | 179492224 | 16513  | 0.17 | Y | L |        |        |                          |
| 1289 | 4 | 4q34.3          | 179511731 | 179544179 | 32449  | 0.08 | N | L |        |        |                          |
| 1290 | 4 | 4q34.3          | 179655282 | 179695663 | 40382  | 0.56 | N | L |        |        |                          |
| 1291 | 4 | 4q34.3          | 179896347 | 179943933 | 47587  | 0.06 | Y | L |        |        |                          |
| 1292 | 4 | 4q34.3          | 180199353 | 180223722 | 24370  | 1.76 | N | L |        |        |                          |
| 1293 | 4 | 4q34.3          | 180579960 | 180598820 | 18861  | 0.06 | N | L |        |        |                          |
| 1294 | 4 | 4q34.3          | 181452649 | 181468744 | 16096  | 0.08 | N | L |        |        |                          |
| 1295 | 4 | 4q34.3          | 181578657 | 181584384 | 5728   | 0.08 | N | L |        |        |                          |
| 1296 | 4 | 4q34.3          | 181762576 | 181800001 | 37426  | 0.95 | N | L |        |        |                          |
| 1297 | 4 | 4q34.3          | 182376938 | 182392569 | 15632  | 0.06 | Y | L |        |        |                          |
| 1298 | 4 | 4q35.1          | 182775963 | 182785014 | 9052   | 0.20 | N | L |        |        |                          |
| 1299 | 4 | 4q35.1          | 183297980 | 183318865 | 20886  | 0.08 | N | L |        |        |                          |
| 1300 | 4 | 4q35.1          | 185078105 | 185106486 | 28382  | 0.06 | N | L |        |        |                          |
| 1301 | 4 | 4q35.1          | 186670019 | 186684564 | 14546  | 4.64 | Y | G | 605889 |        |                          |
| 1302 | 4 | 4q35.1          | 187036233 | 187059135 | 22903  | 0.06 | N | L |        |        |                          |

|      |   |         |           |           |         |      |   |   |        |        |                                                        |
|------|---|---------|-----------|-----------|---------|------|---|---|--------|--------|--------------------------------------------------------|
| 1303 | 4 | 4q35.2  | 187324096 | 187346860 | 22765   | 0.45 | Y | L |        |        |                                                        |
| 1304 | 4 | 4q35.2  | 188134982 | 188141831 | 6850    | 0.22 | Y | L |        |        |                                                        |
| 1305 | 4 | 4q35.2  | 188170396 | 189181045 | 1010650 | 0.14 | Y | L |        |        |                                                        |
| 1306 | 4 | 4q35.2  | 189400592 | 189460285 | 59694   | 0.08 | Y | L |        |        |                                                        |
| 1307 | 4 | 4q35.2  | 189581200 | 189928073 | 346874  | 0.25 | Y | L |        |        |                                                        |
| 1308 | 4 | 4q35.2  | 189936342 | 190006927 | 70586   | 2.24 | Y | C |        |        |                                                        |
| 1309 | 4 | 4q35.2  | 190179853 | 190238605 | 58753   | 0.56 | Y | L |        |        |                                                        |
| 1310 | 5 | 5p15.33 | 688709    | 712605    | 23897   | 0.17 | Y | L |        |        |                                                        |
| 1311 | 5 | 5p15.33 | 738504    | 878573    | 140070  | 4.47 | Y | C | 608773 |        |                                                        |
| 1312 | 5 | 5p15.33 | 1907650   | 1933588   | 25939   | 0.20 | N | L | 606199 |        |                                                        |
| 1313 | 5 | 5p15.33 | 3179669   | 3183197   | 3529    | 0.06 | Y | L |        |        |                                                        |
| 1314 | 5 | 5p15.33 | 3207650   | 3212357   | 4708    | 0.06 | Y | L |        |        |                                                        |
| 1315 | 5 | 5p15.31 | 6657952   | 6665243   | 7292    | 0.08 | N | L | 610916 |        |                                                        |
| 1316 | 5 | 5p15.31 | 6773916   | 6790134   | 16219   | 0.06 | N | L | 605198 |        |                                                        |
| 1317 | 5 | 5p15.2  | 8708476   | 8715681   | 7206    | 0.06 | N | L |        |        |                                                        |
| 1318 | 5 | 5p15.2  | 9013917   | 9030698   | 16782   | 0.31 | N | L |        |        |                                                        |
| 1319 | 5 | 5p15.2  | 11649731  | 11652392  | 2662    | 0.59 | N | G | 604275 | 604275 | Mental retardation in cri-du-chat syndrome, 123450 (2) |
| 1320 | 5 | 5p15.2  | 12155650  | 12171310  | 15661   | 0.25 | Y | L |        |        |                                                        |
| 1321 | 5 | 5p15.2  | 12321678  | 12371483  | 49806   | 0.89 | N | L |        |        |                                                        |
| 1322 | 5 | 5p15.2  | 12417919  | 12460471  | 42553   | 0.06 | N | L |        |        |                                                        |
| 1323 | 5 | 5p15.2  | 12838262  | 12941815  | 103554  | 0.06 | Y | L |        |        |                                                        |
| 1324 | 5 | 5p15.2  | 13651086  | 13662659  | 11574   | 0.06 | N | L |        |        |                                                        |
| 1325 | 5 | 5p15.1  | 15772222  | 15776346  | 4125    | 0.73 | Y | L | 605656 |        |                                                        |
| 1326 | 5 | 5p15.1  | 16181642  | 16222094  | 40453   | 0.06 | N | L |        |        |                                                        |
| 1327 | 5 | 5p15.1  | 16695107  | 16708525  | 13419   | 0.17 | Y | L |        |        |                                                        |
| 1328 | 5 | 5p15.1  | 17494627  | 17531540  | 36914   | 0.08 | Y | L |        |        |                                                        |
| 1329 | 5 | 5p15.1  | 17553576  | 17829272  | 275697  | 0.78 | Y | L |        |        |                                                        |
| 1330 | 5 | 5p15.1  | 18265771  | 18317784  | 52014   | 0.08 | Y | L |        |        |                                                        |
| 1331 | 5 | 5p15.1  | 18337522  | 18355033  | 17512   | 0.08 | Y | L |        |        |                                                        |
| 1332 | 5 | 5p15.1  | 18455597  | 18489767  | 34171   | 0.06 | N | L |        |        |                                                        |
| 1333 | 5 | 5p14.3  | 18639961  | 18658338  | 18378   | 0.08 | Y | L |        |        |                                                        |
| 1334 | 5 | 5p14.3  | 18736309  | 18770511  | 34203   | 0.11 | Y | L |        |        |                                                        |
| 1335 | 5 | 5p14.3  | 18791245  | 18847574  | 56330   | 0.08 | Y | L |        |        |                                                        |
| 1336 | 5 | 5p14.3  | 19033767  | 19084878  | 51112   | 0.08 | Y | L |        |        |                                                        |
| 1337 | 5 | 5p14.3  | 19143167  | 19498734  | 355568  | 0.73 | Y | L |        |        |                                                        |
| 1338 | 5 | 5p14.3  | 19717522  | 19730591  | 13070   | 0.06 | Y | L | 603019 |        |                                                        |
| 1339 | 5 | 5p14.3  | 20069343  | 20087839  | 18497   | 0.08 | N | L |        |        |                                                        |
| 1340 | 5 | 5p14.3  | 22261169  | 22279743  | 18575   | 0.14 | N | L | 600562 |        |                                                        |
| 1341 | 5 | 5p14.3  | 22428864  | 22514538  | 85675   | 0.06 | Y | L | 600562 |        |                                                        |
| 1342 | 5 | 5p14.2  | 23764882  | 23790731  | 25850   | 0.20 | N | L |        |        |                                                        |
| 1343 | 5 | 5p14.2  | 24032647  | 24292445  | 259799  | 0.36 | Y | L |        |        |                                                        |
| 1344 | 5 | 5p14.1  | 25203980  | 25359299  | 155320  | 0.11 | N | L |        |        |                                                        |
| 1345 | 5 | 5p14.1  | 25838471  | 25857442  | 18972   | 0.50 | N | L |        |        |                                                        |
| 1346 | 5 | 5p14.1  | 25980135  | 26028304  | 48170   | 0.17 | Y | L |        |        |                                                        |
| 1347 | 5 | 5p14.1  | 26307746  | 26357418  | 49673   | 1.06 | Y | L |        |        |                                                        |
| 1348 | 5 | 5p14.1  | 26773446  | 26802183  | 28738   | 0.08 | Y | L |        |        |                                                        |
| 1349 | 5 | 5p14.1  | 27392133  | 27417384  | 25252   | 0.06 | N | L |        |        |                                                        |
| 1350 | 5 | 5p14.1  | 27636366  | 27660426  | 24061   | 0.06 | N | L |        |        |                                                        |
| 1351 | 5 | 5p14.1  | 28497941  | 28501233  | 3293    | 0.06 | N | L |        |        |                                                        |
| 1352 | 5 | 5p14.1  | 28536433  | 28581819  | 45387   | 0.25 | N | L |        |        |                                                        |
| 1353 | 5 | 5p14.1  | 29064307  | 29083225  | 18919   | 1.29 | N | G |        |        |                                                        |
| 1354 | 5 | 5p13.3  | 30244188  | 30333046  | 88859   | 0.06 | N | L |        |        |                                                        |
| 1355 | 5 | 5p13.3  | 30519035  | 30587061  | 68027   | 0.92 | Y | L |        |        |                                                        |
| 1356 | 5 | 5p13.3  | 30628122  | 30666320  | 38199   | 0.17 | N | L |        |        |                                                        |
| 1357 | 5 | 5p13.3  | 30748146  | 30810003  | 61858   | 1.40 | N | L |        |        |                                                        |
| 1358 | 5 | 5p13.3  | 30865434  | 30870665  | 5232    | 0.14 | N | L |        |        |                                                        |
| 1359 | 5 | 5p13.3  | 31131278  | 31154741  | 23464   | 0.28 | N | L |        |        |                                                        |
| 1360 | 5 | 5p13.3  | 32145485  | 32194228  | 48744   | 0.11 | Y | G | 610697 |        |                                                        |
| 1361 | 5 | 5p13.2  | 35456708  | 35495406  | 38699   | 0.22 | N | L |        |        |                                                        |
| 1362 | 5 | 5p13.2  | 37806593  | 37824246  | 17654   | 0.06 | N | L |        |        |                                                        |
| 1363 | 5 | 5p13.1  | 39664592  | 39699737  | 35146   | 0.17 | N | L |        |        |                                                        |
| 1364 | 5 | 5p13.1  | 40310215  | 40322254  | 12040   | 0.06 | N | L |        |        |                                                        |
| 1365 | 5 | 5p13.1  | 40412624  | 40442499  | 29876   | 0.06 | N | L |        |        |                                                        |
| 1366 | 5 | 5p13.1  | 40911636  | 41036428  | 124793  | 0.31 | Y | L | 610102 |        |                                                        |
| 1367 | 5 | 5p13.1  | 41140423  | 41260297  | 119875  | 0.06 | Y | L | 612446 |        |                                                        |
| 1368 | 5 | 5p13.1  | 41607066  | 41636164  | 29099   | 0.64 | Y | L |        |        |                                                        |
| 1369 | 5 | 5p12    | 43900737  | 43967590  | 66854   | 1.20 | N | L |        |        |                                                        |
| 1370 | 5 | 5p12    | 44383842  | 44411214  | 27373   | 1.06 | N | L | 602115 | 602115 | Aplasia of lacrimal and salivary glands, 180920 (3)    |
| 1371 | 5 | 5p12    | 44450407  | 44476919  | 26513   | 0.08 | N | L |        |        |                                                        |

|      |   |        |          |          |        |       |   |   |        |        |                                    |
|------|---|--------|----------|----------|--------|-------|---|---|--------|--------|------------------------------------|
| 1372 | 5 | 5p12   | 44722918 | 44810434 | 87517  | 1.40  | N | L |        |        |                                    |
| 1373 | 5 | 5p12   | 44880167 | 44925813 | 45647  | 0.06  | N | L |        |        |                                    |
| 1374 | 5 | 5p11   | 45957045 | 46421178 | 464134 | 20.46 | Y | C |        |        |                                    |
| 1375 | 5 | 5q11.1 | 50354901 | 50380231 | 25331  | 0.06  | Y | L |        |        |                                    |
| 1376 | 5 | 5q11.2 | 50838014 | 50898889 | 60876  | 6.09  | N | L |        |        |                                    |
| 1377 | 5 | 5q11.2 | 51251187 | 51270692 | 19506  | 6.79  | Y | C |        |        |                                    |
| 1378 | 5 | 5q11.2 | 51337944 | 51362301 | 24358  | 0.36  | Y | L |        |        |                                    |
| 1379 | 5 | 5q11.2 | 51404742 | 51437971 | 33230  | 0.11  | Y | C |        |        |                                    |
| 1380 | 5 | 5q11.2 | 51546168 | 51684246 | 138079 | 2.88  | N | L |        |        |                                    |
| 1381 | 5 | 5q11.2 | 51864208 | 51893636 | 29429  | 0.14  | Y | L |        |        |                                    |
| 1382 | 5 | 5q11.2 | 52030772 | 52085030 | 54259  | 0.81  | Y | L |        |        |                                    |
| 1383 | 5 | 5q11.2 | 52373540 | 52406189 | 32650  | 0.17  | N | L | 192974 | 192974 | Glycoprotein Ia deficiency (1) (?) |
| 1384 | 5 | 5q11.2 | 52629360 | 52696270 | 66911  | 2.88  | N | L |        |        |                                    |
| 1385 | 5 | 5q11.2 | 56985279 | 57036474 | 51196  | 0.11  | N | L |        |        |                                    |
| 1386 | 5 | 5q11.2 | 57067695 | 57100618 | 32924  | 0.08  | N | L |        |        |                                    |
| 1387 | 5 | 5q11.2 | 57276524 | 57290654 | 14131  | 0.06  | N | L |        |        |                                    |
| 1388 | 5 | 5q11.2 | 57354826 | 57377909 | 23084  | 29.71 | Y | G |        |        |                                    |
| 1389 | 5 | 5q11.2 | 57832603 | 57843924 | 11322  | 0.06  | N | L |        |        |                                    |
| 1390 | 5 | 5q11.2 | 58573606 | 58651254 | 77649  | 0.98  | N | L | 606799 |        |                                    |
| 1391 | 5 | 5q12.1 | 59158961 | 59186227 | 27267  | 0.14  | Y | L | 606799 |        |                                    |
| 1392 | 5 | 5q12.1 | 59550653 | 59589465 | 38813  | 0.50  | N | L |        |        |                                    |
| 1393 | 5 | 5q12.1 | 62595470 | 62634209 | 38740  | 0.95  | N | C |        |        |                                    |
| 1394 | 5 | 5q12.1 | 62764937 | 62862382 | 97446  | 0.84  | N | L |        |        |                                    |
| 1395 | 5 | 5q12.1 | 62965204 | 62990640 | 25437  | 0.75  | N | L |        |        |                                    |
| 1396 | 5 | 5q12.3 | 63940824 | 63964703 | 23880  | 0.11  | N | L | 610890 |        |                                    |
| 1397 | 5 | 5q13.2 | 68865078 | 69595446 | 730369 | 0.08  | Y | C | 602876 |        |                                    |
| 1398 | 5 | 5q13.2 | 72394245 | 72412426 | 18182  | 0.06  | N | L |        |        |                                    |
| 1399 | 5 | 5q13.3 | 73628984 | 73653551 | 24568  | 0.28  | N | L |        |        |                                    |
| 1400 | 5 | 5q14.1 | 77879577 | 77895402 | 15826  | 0.70  | N | L | 609718 |        |                                    |
| 1401 | 5 | 5q14.1 | 79425323 | 79434429 | 9107   | 0.06  | Y | L |        |        |                                    |
| 1402 | 5 | 5q14.2 | 82465004 | 82475451 | 10448  | 0.14  | N | L | 194363 |        |                                    |
| 1403 | 5 | 5q14.2 | 82735230 | 82750148 | 14919  | 0.06  | N | L |        |        |                                    |
| 1404 | 5 | 5q14.3 | 83231974 | 83364766 | 132793 | 3.58  | Y | L | 606018 |        |                                    |
| 1405 | 5 | 5q14.3 | 84040357 | 84135472 | 95116  | 2.18  | Y | L |        |        |                                    |
| 1406 | 5 | 5q14.3 | 84156628 | 84172528 | 15901  | 0.06  | N | L |        |        |                                    |
| 1407 | 5 | 5q14.3 | 84386119 | 84433985 | 47867  | 0.06  | N | L |        |        |                                    |
| 1408 | 5 | 5q14.3 | 84467447 | 84485862 | 18416  | 0.06  | Y | L |        |        |                                    |
| 1409 | 5 | 5q14.3 | 84544706 | 84551997 | 7292   | 0.06  | N | L |        |        |                                    |
| 1410 | 5 | 5q14.3 | 84809352 | 84864669 | 55318  | 0.89  | N | L |        |        |                                    |
| 1411 | 5 | 5q14.3 | 84901437 | 84910042 | 8606   | 0.08  | N | L |        |        |                                    |
| 1412 | 5 | 5q14.3 | 85685428 | 85730767 | 45340  | 0.48  | N | L |        |        |                                    |
| 1413 | 5 | 5q14.3 | 86036636 | 86047296 | 10661  | 0.14  | Y | L |        |        |                                    |
| 1414 | 5 | 5q14.3 | 86172721 | 86190869 | 18149  | 0.22  | Y | L |        |        |                                    |
| 1415 | 5 | 5q14.3 | 86967159 | 86996417 | 29259  | 0.20  | N | L |        |        |                                    |
| 1416 | 5 | 5q14.3 | 87867490 | 87901544 | 34055  | 0.17  | N | L |        |        |                                    |
| 1417 | 5 | 5q14.3 | 88571227 | 88593084 | 21858  | 0.11  | N | L |        |        |                                    |
| 1418 | 5 | 5q14.3 | 88981865 | 89021045 | 39181  | 0.31  | N | L |        |        |                                    |
| 1419 | 5 | 5q14.3 | 89047168 | 89072859 | 25692  | 0.53  | N | L |        |        |                                    |
| 1420 | 5 | 5q14.3 | 89233437 | 89297026 | 63590  | 5.48  | N | L |        |        |                                    |
| 1421 | 5 | 5q14.3 | 89587666 | 89614530 | 26865  | 0.67  | N | L |        |        |                                    |
| 1422 | 5 | 5q14.3 | 89698957 | 89716688 | 17732  | 0.08  | N | L |        |        |                                    |
| 1423 | 5 | 5q14.3 | 90295371 | 90308554 | 13184  | 0.06  | N | L | 605472 |        |                                    |
| 1424 | 5 | 5q14.3 | 90903382 | 90978244 | 74863  | 4.25  | N | L |        |        |                                    |
| 1425 | 5 | 5q14.3 | 91309635 | 91338803 | 29169  | 0.11  | N | L |        |        |                                    |
| 1426 | 5 | 5q14.3 | 91462495 | 91496911 | 34417  | 0.70  | N | L |        |        |                                    |
| 1427 | 5 | 5q14.3 | 91617192 | 91662139 | 44948  | 0.06  | N | L |        |        |                                    |
| 1428 | 5 | 5q14.3 | 91836902 | 91865909 | 29008  | 0.14  | N | L |        |        |                                    |
| 1429 | 5 | 5q15   | 92003630 | 92028053 | 24424  | 0.11  | N | L |        |        |                                    |
| 1430 | 5 | 5q15   | 92070024 | 92107329 | 37306  | 0.31  | N | L |        |        |                                    |
| 1431 | 5 | 5q15   | 92250618 | 92302191 | 51574  | 2.18  | N | L |        |        |                                    |
| 1432 | 5 | 5q15   | 92438999 | 92471800 | 32802  | 0.06  | N | L |        |        |                                    |
| 1433 | 5 | 5q15   | 93242287 | 93276364 | 34078  | 0.06  | N | L |        |        |                                    |
| 1434 | 5 | 5q15   | 94016419 | 94040774 | 24356  | 0.06  | Y | L |        |        |                                    |
| 1435 | 5 | 5q15   | 94221220 | 94245130 | 23911  | 0.17  | N | L |        |        |                                    |
| 1436 | 5 | 5q15   | 94330013 | 94332512 | 2500   | 0.06  | N | L |        |        |                                    |
| 1437 | 5 | 5q15   | 96453454 | 96653737 | 200284 | 0.06  | Y | L | 610466 |        |                                    |
| 1438 | 5 | 5q15   | 96682722 | 96697549 | 14828  | 0.06  | N | L |        |        |                                    |
| 1439 | 5 | 5q15   | 96920179 | 96960756 | 40578  | 0.28  | Y | L |        |        |                                    |
| 1440 | 5 | 5q21.1 | 97399118 | 97508411 | 109294 | 0.11  | Y | L |        |        |                                    |
| 1441 | 5 | 5q21.1 | 98530741 | 98552712 | 21972  | 0.31  | N | L |        |        |                                    |
| 1442 | 5 | 5q21.1 | 98906086 | 98920789 | 14704  | 0.08  | Y | L |        |        |                                    |
| 1443 | 5 | 5q21.1 | 99240210 | 99250136 | 9927   | 0.06  | Y | L |        |        |                                    |
| 1444 | 5 | 5q21.1 | 99466795 | 99614617 | 147823 | 0.50  | Y | L |        |        |                                    |

|      |   |                   |           |           |        |       |   |   |        |        |                                                     |
|------|---|-------------------|-----------|-----------|--------|-------|---|---|--------|--------|-----------------------------------------------------|
| 1445 | 5 | 5q21.1            | 99631839  | 99732452  | 100614 | 0.92  | Y | L |        |        |                                                     |
| 1446 | 5 | 5q21.1            | 99800724  | 99821543  | 20820  | 0.06  | Y | L |        |        |                                                     |
| 1447 | 5 | 5q21.1            | 100579903 | 100651650 | 71748  | 1.03  | Y | L |        |        |                                                     |
| 1448 | 5 | 5q21.1            | 100653331 | 100669189 | 15859  | 0.36  | Y | L |        |        |                                                     |
| 1449 | 5 | 5q21.1            | 100730210 | 100794735 | 64526  | 10.23 | Y | L |        |        |                                                     |
| 1450 | 5 | 5q21.1            | 101576421 | 101594878 | 18458  | 0.08  | N | G |        |        |                                                     |
| 1451 | 5 | 5q21.1            | 102254262 | 102279281 | 25020  | 0.48  | Y | L | 170270 |        |                                                     |
| 1452 | 5 | 5q21.2            | 102818453 | 102840006 | 21554  | 0.08  | N | L |        |        |                                                     |
| 1453 | 5 | 5q21.2            | 102868503 | 102891658 | 23156  | 0.50  | N | L |        |        |                                                     |
| 1454 | 5 | 5q21.2            | 103375002 | 103386921 | 11920  | 0.17  | N | L |        |        |                                                     |
| 1455 | 5 | 5q21.2            | 103508373 | 103553415 | 45043  | 0.11  | Y | L |        |        |                                                     |
| 1456 | 5 | 5q21.2            | 103617420 | 103733769 | 116350 | 2.21  | Y | L |        |        |                                                     |
| 1457 | 5 | 5q21.2            | 103856489 | 103901448 | 44960  | 0.34  | Y | L |        |        |                                                     |
| 1458 | 5 | 5q21.2            | 103967906 | 103999354 | 31449  | 0.08  | Y | L |        |        |                                                     |
| 1459 | 5 | 5q21.2-<br>5q21.3 | 104137518 | 104720858 | 583341 | 2.63  | Y | L |        |        |                                                     |
| 1460 | 5 | 5q21.3            | 105883683 | 105937755 | 54073  | 0.28  | Y | L |        |        |                                                     |
| 1461 | 5 | 5q21.3            | 106157394 | 106195658 | 38265  | 0.34  | Y | L |        |        |                                                     |
| 1462 | 5 | 5q21.3            | 106257775 | 106260967 | 3193   | 0.17  | Y | L |        |        |                                                     |
| 1463 | 5 | 5q21.3            | 106365700 | 106421959 | 56260  | 0.11  | N | L |        |        |                                                     |
| 1464 | 5 | 5q21.3            | 106563033 | 106600350 | 37318  | 0.48  | Y | L |        |        |                                                     |
| 1465 | 5 | 5q21.3            | 106672303 | 106694011 | 21709  | 1.23  | Y | L |        |        |                                                     |
| 1466 | 5 | 5q21.3            | 107258950 | 107291495 | 32546  | 0.06  | N | L |        |        |                                                     |
| 1467 | 5 | 5q21.3            | 108196415 | 108266914 | 70500  | 0.08  | N | L | 176942 |        |                                                     |
| 1468 | 5 | 5q21.3            | 108362716 | 108387069 | 24354  | 0.08  | N | L | 176942 |        |                                                     |
| 1469 | 5 | 5q22.1            | 109664263 | 109686928 | 22666  | 0.73  | Y | L |        |        |                                                     |
| 1470 | 5 | 5q22.1            | 110459059 | 110484162 | 25104  | 0.08  | Y | L | 609887 |        |                                                     |
| 1471 | 5 | 5q22.1            | 110682996 | 110767782 | 84787  | 1.62  | N | L | 114080 |        |                                                     |
| 1472 | 5 | 5q22.1            | 110925219 | 110938411 | 13193  | 0.06  | Y | L |        |        |                                                     |
| 1473 | 5 | 5q22.1            | 111115706 | 111131642 | 15937  | 0.17  | Y | L | 607332 |        |                                                     |
| 1474 | 5 | 5q22.1            | 111269711 | 111317810 | 48100  | 0.25  | N | L |        |        |                                                     |
| 1475 | 5 | 5q22.2            | 111889803 | 111943779 | 53977  | 0.22  | N | L |        |        |                                                     |
| 1476 | 5 | 5q22.2            | 112919768 | 112944752 | 24985  | 0.06  | Y | L |        |        |                                                     |
| 1477 | 5 | 5q22.3            | 113933753 | 114010130 | 76378  | 1.90  | N | L |        |        |                                                     |
| 1478 | 5 | 5q22.3            | 114043072 | 114055740 | 12669  | 0.08  | Y | L |        |        |                                                     |
| 1479 | 5 | 5q22.3            | 114730430 | 114750865 | 20436  | 1.12  | Y | L |        |        |                                                     |
| 1480 | 5 | 5q22.3            | 114847740 | 114855405 | 7666   | 0.22  | N | C |        |        |                                                     |
| 1481 | 5 | 5q23.1            | 115429402 | 115562481 | 133080 | 1.01  | Y | L |        |        |                                                     |
| 1482 | 5 | 5q23.1            | 115599134 | 115687863 | 88730  | 1.12  | Y | L |        |        |                                                     |
| 1483 | 5 | 5q23.1            | 116159656 | 116181118 | 21463  | 0.28  | N | L |        |        |                                                     |
| 1484 | 5 | 5q23.1            | 116193431 | 116338241 | 144811 | 0.06  | Y | L |        |        |                                                     |
| 1485 | 5 | 5q23.1            | 117071127 | 117103205 | 32079  | 0.22  | Y | L |        |        |                                                     |
| 1486 | 5 | 5q23.1            | 117160803 | 117182157 | 21355  | 0.11  | N | L |        |        |                                                     |
| 1487 | 5 | 5q23.1            | 117365652 | 117384460 | 18809  | 0.08  | Y | L |        |        |                                                     |
| 1488 | 5 | 5q23.1            | 117457144 | 117560047 | 102904 | 0.20  | Y | L |        |        |                                                     |
| 1489 | 5 | 5q23.1            | 117874543 | 117967149 | 92607  | 1.51  | Y | L |        |        |                                                     |
| 1490 | 5 | 5q23.1            | 118486955 | 118502139 | 15185  | 0.34  | Y | C | 605671 |        |                                                     |
| 1491 | 5 | 5q23.1            | 118812955 | 119017271 | 204317 | 0.06  | N | L | 601860 | 601860 | D-bifunctional<br>protein deficiency,<br>261515 (3) |
| 1492 | 5 | 5q23.1            | 119406410 | 119447678 | 41269  | 0.67  | Y | L |        |        |                                                     |
| 1493 | 5 | 5q23.1            | 119550833 | 119659386 | 108554 | 1.12  | N | L |        |        |                                                     |
| 1494 | 5 | 5q23.1            | 119908466 | 119920111 | 11646  | 0.06  | N | L |        |        |                                                     |
| 1495 | 5 | 5q23.1            | 120000896 | 120023438 | 22543  | 0.17  | Y | L |        |        |                                                     |
| 1496 | 5 | 5q23.1            | 120217367 | 120260066 | 42700  | 0.17  | Y | L |        |        |                                                     |
| 1497 | 5 | 5q23.1            | 120417072 | 120565090 | 148019 | 2.82  | Y | L |        |        |                                                     |
| 1498 | 5 | 5q23.1            | 120733279 | 120762965 | 29687  | 0.17  | Y | L |        |        |                                                     |
| 1499 | 5 | 5q23.1            | 120848326 | 120864296 | 15971  | 0.06  | Y | L |        |        |                                                     |
| 1500 | 5 | 5q23.1            | 121056219 | 121073696 | 17478  | 0.06  | Y | L |        |        |                                                     |
| 1501 | 5 | 5q23.1            | 121109958 | 121185696 | 75739  | 1.68  | Y | L |        |        |                                                     |
| 1502 | 5 | 5q23.2            | 121596366 | 121626505 | 30140  | 0.11  | Y | L |        |        |                                                     |
| 1503 | 5 | 5q23.2            | 121912644 | 121954298 | 41655  | 1.12  | N | L |        |        |                                                     |
| 1504 | 5 | 5q23.2            | 122510080 | 122515303 | 5224   | 0.06  | N | L |        |        |                                                     |
| 1505 | 5 | 5q23.2            | 122724781 | 122751855 | 27075  | 1.23  | Y | L |        |        |                                                     |
| 1506 | 5 | 5q23.2            | 123021865 | 123027443 | 5579   | 0.06  | Y | C |        |        |                                                     |
| 1507 | 5 | 5q23.2            | 123083668 | 123151917 | 68250  | 0.08  | N | L |        |        |                                                     |
| 1508 | 5 | 5q23.2            | 123165440 | 123174963 | 9524   | 0.06  | N | L |        |        |                                                     |
| 1509 | 5 | 5q23.2            | 123448411 | 123464703 | 16293  | 0.08  | N | L |        |        |                                                     |
| 1510 | 5 | 5q23.2            | 123472519 | 123552292 | 79774  | 1.20  | Y | L |        |        |                                                     |
| 1511 | 5 | 5q23.2            | 123818130 | 123836442 | 18313  | 0.06  | N | L |        |        |                                                     |
| 1512 | 5 | 5q23.2            | 124619741 | 124679310 | 59570  | 0.75  | N | C |        |        |                                                     |
| 1513 | 5 | 5q23.2            | 124689513 | 124701914 | 12402  | 0.06  | N | L |        |        |                                                     |
| 1514 | 5 | 5q23.2            | 124857012 | 124899526 | 42515  | 0.61  | N | L |        |        |                                                     |
| 1515 | 5 | 5q23.2            | 125134958 | 125150396 | 15439  | 0.06  | Y | L |        |        |                                                     |

|      |   |        |           |           |        |       |   |   |        |        |                                                       |  |
|------|---|--------|-----------|-----------|--------|-------|---|---|--------|--------|-------------------------------------------------------|--|
| 1516 | 5 | 5q23.2 | 125290241 | 125340175 | 49935  | 4.61  | Y | L |        |        |                                                       |  |
| 1517 | 5 | 5q23.2 | 125421412 | 125456633 | 35222  | 0.08  | Y | C |        |        |                                                       |  |
| 1518 | 5 | 5q23.2 | 126738855 | 126774333 | 35479  | 0.06  | N | L | 612453 |        |                                                       |  |
| 1519 | 5 | 5q23.3 | 128293561 | 128447221 | 153661 | 0.61  | Y | L | 604196 |        |                                                       |  |
| 1520 | 5 | 5q23.3 | 128616716 | 128642950 | 26235  | 0.06  | Y | L |        |        |                                                       |  |
| 1521 | 5 | 5q23.3 | 128901830 | 128924511 | 22682  | 0.06  | Y | L | 607513 |        |                                                       |  |
| 1522 | 5 | 5q23.3 | 129147288 | 129243465 | 96178  | 3.10  | N | L |        |        |                                                       |  |
| 1523 | 5 | 5q31.1 | 131699082 | 131706917 | 7836   | 0.06  | N | L | 604190 | 604190 | {Rheumatoid arthritis, susceptibility to}, 180300 (3) |  |
| 1524 | 5 | 5q31.1 | 135339424 | 135360470 | 21047  | 0.28  | Y | L |        |        |                                                       |  |
| 1525 | 5 | 5q31.2 | 135880049 | 135970423 | 90375  | 0.08  | N | L |        |        |                                                       |  |
| 1526 | 5 | 5q31.2 | 136210845 | 136252256 | 41412  | 0.73  | N | L |        |        |                                                       |  |
| 1527 | 5 | 5q31.3 | 140172884 | 140222663 | 49780  | 0.08  | Y | C |        |        |                                                       |  |
| 1528 | 5 | 5q31.3 | 140524926 | 140533575 | 8650   | 0.06  | Y | C | 606333 |        |                                                       |  |
| 1529 | 5 | 5q31.3 | 140554571 | 140598163 | 43593  | 0.22  | Y | C | 606336 |        |                                                       |  |
| 1530 | 5 | 5q32   | 143151434 | 143171057 | 19624  | 0.11  | N | L |        |        |                                                       |  |
| 1531 | 5 | 5q32   | 143462323 | 143472814 | 10492  | 0.17  | N | L |        |        |                                                       |  |
| 1532 | 5 | 5q32   | 144063953 | 144098477 | 34525  | 0.08  | N | L |        |        |                                                       |  |
| 1533 | 5 | 5q32   | 144106454 | 144116274 | 9821   | 0.14  | N | L |        |        |                                                       |  |
| 1534 | 5 | 5q32   | 144187012 | 144264971 | 77960  | 2.82  | Y | L |        |        |                                                       |  |
| 1535 | 5 | 5q32   | 144296195 | 144363201 | 67007  | 1.09  | Y | L |        |        |                                                       |  |
| 1536 | 5 | 5q32   | 144458915 | 144490324 | 31410  | 0.17  | Y | L |        |        |                                                       |  |
| 1537 | 5 | 5q32   | 144612064 | 144641323 | 29260  | 0.06  | N | L |        |        |                                                       |  |
| 1538 | 5 | 5q32   | 145444661 | 145484619 | 39959  | 0.17  | N | L | 151350 |        |                                                       |  |
| 1539 | 5 | 5q32   | 146260896 | 146271461 | 10566  | 0.08  | N | L | 604326 |        |                                                       |  |
| 1540 | 5 | 5q33.1 | 147428553 | 147459108 | 30556  | 0.08  | N | L | 605010 | 605010 | Atopy, 147050 (3)                                     |  |
| 1541 | 5 | 5q33.1 | 147700833 | 147727781 | 26949  | 0.56  | N | L |        |        |                                                       |  |
| 1542 | 5 | 5q33.1 | 148027909 | 148055222 | 27314  | 0.08  | N | L |        |        |                                                       |  |
| 1543 | 5 | 5q33.1 | 150156694 | 150213408 | 56715  | 16.77 | Y | C | 608212 |        |                                                       |  |
| 1544 | 5 | 5q33.1 | 151773302 | 151794689 | 21388  | 0.08  | N | L |        |        |                                                       |  |
| 1545 | 5 | 5q33.2 | 152289792 | 152335603 | 45812  | 1.29  | Y | L |        |        |                                                       |  |
| 1546 | 5 | 5q33.2 | 152404913 | 152429873 | 24961  | 0.08  | N | L |        |        |                                                       |  |
| 1547 | 5 | 5q33.2 | 152543683 | 152592515 | 48833  | 0.42  | N | L |        |        |                                                       |  |
| 1548 | 5 | 5q33.2 | 152920107 | 152928885 | 8779   | 0.06  | N | L | 138248 |        |                                                       |  |
| 1549 | 5 | 5q33.2 | 153231012 | 153251269 | 20258  | 0.14  | Y | L |        |        |                                                       |  |
| 1550 | 5 | 5q33.2 | 154761413 | 154775892 | 14480  | 0.11  | N | L |        |        |                                                       |  |
| 1551 | 5 | 5q33.2 | 154808153 | 154869196 | 61044  | 4.72  | N | L |        |        |                                                       |  |
| 1552 | 5 | 5q33.2 | 155004092 | 155052244 | 48153  | 0.25  | N | L |        |        |                                                       |  |
| 1553 | 5 | 5q33.2 | 155320639 | 155340456 | 19818  | 0.08  | Y | L |        |        |                                                       |  |
| 1554 | 5 | 5q33.2 | 155398183 | 155404166 | 5984   | 0.20  | Y | L |        |        |                                                       |  |
| 1555 | 5 | 5q33.2 | 155538630 | 155594321 | 55692  | 0.06  | Y | L |        |        |                                                       |  |
| 1556 | 5 | 5q33.3 | 155793156 | 155829395 | 36240  | 0.39  | N | L | 601411 | 601411 | Cardiomyopathy, dilated, 1L, 606685 (3)               |  |
| 1557 | 5 | 5q33.3 | 158125627 | 158174816 | 49190  | 0.17  | N | L | 164343 |        |                                                       |  |
| 1558 | 5 | 5q33.3 | 158917423 | 158973404 | 55982  | 0.06  | Y | L |        |        |                                                       |  |
| 1559 | 5 | 5q33.3 | 159056982 | 159108544 | 51563  | 0.11  | Y | L |        |        |                                                       |  |
| 1560 | 5 | 5q34   | 160830906 | 160887927 | 57022  | 0.17  | Y | L | 600232 |        |                                                       |  |
| 1561 | 5 | 5q34   | 161123799 | 161153666 | 29868  | 0.08  | Y | L |        |        |                                                       |  |
| 1562 | 5 | 5q34   | 161508231 | 161571851 | 63621  | 0.42  | N | L | 611277 |        |                                                       |  |
| 1563 | 5 | 5q34   | 162137343 | 162156143 | 18801  | 0.06  | N | L |        |        |                                                       |  |
| 1564 | 5 | 5q34   | 162199982 | 162222775 | 22794  | 0.14  | N | L |        |        |                                                       |  |
| 1565 | 5 | 5q34   | 163186871 | 163243192 | 56322  | 1.57  | N | L |        |        |                                                       |  |
| 1566 | 5 | 5q34   | 163311229 | 163341026 | 29798  | 0.08  | N | L |        |        |                                                       |  |
| 1567 | 5 | 5q34   | 163547672 | 163578400 | 30729  | 0.17  | N | L |        |        |                                                       |  |
| 1568 | 5 | 5q34   | 163671857 | 163700479 | 28623  | 0.11  | N | L |        |        |                                                       |  |
| 1569 | 5 | 5q34   | 165940868 | 165997849 | 56982  | 1.15  | Y | L |        |        |                                                       |  |
| 1570 | 5 | 5q34   | 166742585 | 166772443 | 29859  | 0.42  | N | L | 610119 |        |                                                       |  |
| 1571 | 5 | 5q35.1 | 167854709 | 167868376 | 13668  | 0.11  | N | L | 107820 |        |                                                       |  |
| 1572 | 5 | 5q35.1 | 169482842 | 169495945 | 13104  | 0.39  | N | L |        |        |                                                       |  |
| 1573 | 5 | 5q35.1 | 171670344 | 171694403 | 24060  | 0.06  | N | L |        |        |                                                       |  |
| 1574 | 5 | 5q35.2 | 174836105 | 174854037 | 17933  | 0.08  | N | L |        |        |                                                       |  |
| 1575 | 5 | 5q35.2 | 175486148 | 175570975 | 84828  | 0.17  | Y | L |        |        |                                                       |  |
| 1576 | 5 | 5q35.3 | 177944164 | 177952530 | 8367   | 0.06  | Y | L | 610043 |        |                                                       |  |
| 1577 | 5 | 5q35.3 | 178662372 | 178863916 | 201545 | 0.34  | Y | G | 604539 | 604539 | Ehlers-Danlos syndrome, type VIIC, 225410 (3)         |  |
| 1578 | 5 | 5q35.3 | 179021402 | 179041276 | 19875  | 0.36  | Y | C |        |        |                                                       |  |
| 1579 | 5 | 5q35.3 | 180247694 | 180378839 | 131146 | 6.06  | Y | L | 606192 |        |                                                       |  |
| 1580 | 6 | 6p25.3 | 202346    | 326099    | 123754 | 1.57  | Y | C |        |        |                                                       |  |
| 1581 | 6 | 6p25.3 | 793633    | 803970    | 10338  | 0.06  | Y | L |        |        |                                                       |  |
| 1582 | 6 | 6p25.2 | 2675993   | 2686797   | 10805  | 0.28  | N | L |        |        |                                                       |  |

|      |   |                     |          |          |        |       |   |   |  |        |        |  |  |  |  |  |  |  |                                                                                   |
|------|---|---------------------|----------|----------|--------|-------|---|---|--|--------|--------|--|--|--|--|--|--|--|-----------------------------------------------------------------------------------|
| 1583 | 6 | 6p25.2              | 3411021  | 3432929  | 21909  | 0.08  | N | L |  |        |        |  |  |  |  |  |  |  |                                                                                   |
| 1584 | 6 | 6p25.1              | 5217670  | 5403146  | 185477 | 0.06  | N | L |  | 611592 |        |  |  |  |  |  |  |  |                                                                                   |
| 1585 | 6 | 6p24.3              | 8524117  | 8575438  | 51322  | 0.08  | N | L |  |        |        |  |  |  |  |  |  |  |                                                                                   |
| 1586 | 6 | 6p24.3              | 9032983  | 9050061  | 17079  | 0.06  | N | L |  |        |        |  |  |  |  |  |  |  |                                                                                   |
| 1587 | 6 | 6p24.3              | 9471935  | 9483919  | 11985  | 0.06  | N | L |  |        |        |  |  |  |  |  |  |  |                                                                                   |
| 1588 | 6 | 6p24.2              | 11141150 | 11151573 | 10424  | 0.08  | N | L |  | 611814 |        |  |  |  |  |  |  |  |                                                                                   |
| 1589 | 6 | 6p24.2              | 11168715 | 11193430 | 24716  | 0.11  | Y | L |  |        |        |  |  |  |  |  |  |  |                                                                                   |
| 1590 | 6 | 6p24.1              | 11999623 | 12010265 | 10643  | 0.25  | N | L |  |        |        |  |  |  |  |  |  |  |                                                                                   |
| 1591 | 6 | 6p22.3              | 16062488 | 16073490 | 11003  | 0.06  | N | L |  |        |        |  |  |  |  |  |  |  |                                                                                   |
| 1592 | 6 | 6p22.3              | 18807196 | 18823162 | 15967  | 0.14  | N | L |  |        |        |  |  |  |  |  |  |  |                                                                                   |
| 1593 | 6 | 6p22.3              | 18899770 | 18923987 | 24218  | 0.11  | N | L |  |        |        |  |  |  |  |  |  |  |                                                                                   |
| 1594 | 6 | 6p22.3              | 18994815 | 19057111 | 62297  | 2.26  | N | L |  |        |        |  |  |  |  |  |  |  |                                                                                   |
| 1595 | 6 | 6p22.3              | 19148921 | 19195657 | 46737  | 0.14  | Y | L |  |        |        |  |  |  |  |  |  |  |                                                                                   |
| 1596 | 6 | 6p22.3              | 22689017 | 22705819 | 16803  | 0.11  | N | L |  |        |        |  |  |  |  |  |  |  |                                                                                   |
| 1597 | 6 | 6p22.3              | 22840801 | 22904732 | 63932  | 0.81  | Y | L |  |        |        |  |  |  |  |  |  |  |                                                                                   |
| 1598 | 6 | 6p22.3              | 23053338 | 23079718 | 26381  | 0.08  | N | L |  |        |        |  |  |  |  |  |  |  |                                                                                   |
| 1599 | 6 | 6p22.3-<br>6p22.2   | 23129250 | 23542007 | 412758 | 0.14  | Y | L |  |        |        |  |  |  |  |  |  |  |                                                                                   |
| 1600 | 6 | 6p22.2              | 23910978 | 23956758 | 45781  | 0.06  | N | L |  |        |        |  |  |  |  |  |  |  |                                                                                   |
| 1601 | 6 | 6p22.2              | 24089744 | 24111433 | 21690  | 0.14  | N | L |  |        |        |  |  |  |  |  |  |  |                                                                                   |
| 1602 | 6 | 6p22.2              | 25838006 | 25852857 | 14852  | 0.20  | N | L |  |        |        |  |  |  |  |  |  |  |                                                                                   |
| 1603 | 6 | 6p22.1              | 26813071 | 26870570 | 57500  | 16.55 | Y | C |  |        |        |  |  |  |  |  |  |  |                                                                                   |
| 1604 | 6 | 6p22.1              | 27458360 | 27463857 | 5498   | 0.06  | N | L |  |        |        |  |  |  |  |  |  |  |                                                                                   |
| 1605 | 6 | 6p22.1              | 29199583 | 29261115 | 61533  | 1.31  | Y | L |  |        |        |  |  |  |  |  |  |  |                                                                                   |
| 1606 | 6 | 6p22.1              | 29394649 | 29442144 | 47496  | 0.06  | N | G |  |        |        |  |  |  |  |  |  |  |                                                                                   |
| 1607 | 6 | 6p22.1-<br>6p21.33  | 29895838 | 29916011 | 20174  | 0.06  | Y | L |  | 142871 | 142871 |  |  |  |  |  |  |  | { Asthma,<br>susceptibility to},<br>600807 (2)                                    |
| 1608 | 6 | 6p21.33             | 29945121 | 29958867 | 13747  | 0.45  | Y | C |  |        |        |  |  |  |  |  |  |  |                                                                                   |
| 1609 | 6 | 6p21.33             | 29965918 | 30023972 | 58055  | 5.34  | Y | L |  | 142800 | 142800 |  |  |  |  |  |  |  | { Abacavir<br>hypersensitivity,<br>susceptibility to}<br>(3)                      |
| 1610 | 6 | 6p21.33             | 30393934 | 30417084 | 23151  | 0.20  | N | L |  | 612524 |        |  |  |  |  |  |  |  |                                                                                   |
| 1611 | 6 | 6p21.33             | 30529415 | 30541671 | 12257  | 0.06  | N | C |  |        |        |  |  |  |  |  |  |  |                                                                                   |
| 1612 | 6 | 6p21.33             | 30874744 | 30895572 | 20829  | 0.17  | Y | L |  |        |        |  |  |  |  |  |  |  |                                                                                   |
| 1613 | 6 | 6p21.33             | 30965521 | 30986898 | 21378  | 0.08  | N | L |  | 600408 |        |  |  |  |  |  |  |  |                                                                                   |
| 1614 | 6 | 6p21.33             | 31377287 | 31385827 | 8541   | 0.45  | Y | L |  |        |        |  |  |  |  |  |  |  |                                                                                   |
| 1615 | 6 | 6p21.33             | 31388768 | 31435702 | 46935  | 1.90  | Y | L |  |        |        |  |  |  |  |  |  |  |                                                                                   |
| 1616 | 6 | 6p21.33             | 31446823 | 31452469 | 5647   | 2.49  | Y | L |  |        |        |  |  |  |  |  |  |  |                                                                                   |
| 1617 | 6 | 6p21.33             | 31468074 | 31563813 | 95740  | 4.97  | Y | C |  | 600169 |        |  |  |  |  |  |  |  |                                                                                   |
| 1618 | 6 | 6p21.33-<br>6p21.32 | 31891281 | 31903457 | 12177  | 0.06  | N | C |  | 140550 |        |  |  |  |  |  |  |  |                                                                                   |
| 1619 | 6 | 6p21.32             | 32043039 | 32113271 | 70233  | 0.17  | Y | L |  | 600478 |        |  |  |  |  |  |  |  |                                                                                   |
| 1620 | 6 | 6p21.32             | 32115305 | 32132059 | 16755  | 0.14  | Y | C |  | 201910 | 201910 |  |  |  |  |  |  |  | Adrenal<br>hyperplasia,<br>congenital, due to<br>21-hydroxylase<br>deficiency (3) |
| 1621 | 6 | 6p21.32             | 32499966 | 32509704 | 9739   | 0.67  | Y | L |  |        |        |  |  |  |  |  |  |  |                                                                                   |
| 1622 | 6 | 6p21.32             | 32537697 | 32538953 | 1257   | 0.11  | Y | L |  |        |        |  |  |  |  |  |  |  |                                                                                   |
| 1623 | 6 | 6p21.32             | 32556076 | 32766288 | 210213 | 66.46 | Y | C |  | 604776 |        |  |  |  |  |  |  |  |                                                                                   |
| 1624 | 6 | 6p21.32             | 32778222 | 32808662 | 30441  | 28.34 | Y | C |  |        |        |  |  |  |  |  |  |  |                                                                                   |
| 1625 | 6 | 6p21.32             | 32827782 | 32840188 | 12407  | 2.38  | Y | G |  |        |        |  |  |  |  |  |  |  |                                                                                   |
| 1626 | 6 | 6p21.32             | 32849846 | 32862898 | 13053  | 0.20  | N | L |  |        |        |  |  |  |  |  |  |  |                                                                                   |
| 1627 | 6 | 6p21.2              | 40118584 | 40163112 | 44529  | 0.08  | Y | L |  |        |        |  |  |  |  |  |  |  |                                                                                   |
| 1628 | 6 | 6p21.2              | 40311415 | 40320698 | 9284   | 0.08  | N | L |  |        |        |  |  |  |  |  |  |  |                                                                                   |
| 1629 | 6 | 6p21.1              | 40798602 | 40811922 | 13321  | 0.08  | N | L |  |        |        |  |  |  |  |  |  |  |                                                                                   |
| 1630 | 6 | 6p21.1              | 43147395 | 43177678 | 30284  | 0.06  | N | C |  | 601890 |        |  |  |  |  |  |  |  |                                                                                   |
| 1631 | 6 | 6p12.3              | 46212161 | 46224408 | 12248  | 0.48  | N | L |  |        |        |  |  |  |  |  |  |  |                                                                                   |
| 1632 | 6 | 6p12.3              | 47929963 | 47955553 | 25591  | 0.17  | N | L |  |        |        |  |  |  |  |  |  |  |                                                                                   |
| 1633 | 6 | 6p12.3              | 48558959 | 48621016 | 62058  | 1.17  | Y | L |  |        |        |  |  |  |  |  |  |  |                                                                                   |
| 1634 | 6 | 6p12.3              | 48703780 | 48761558 | 57779  | 3.49  | Y | L |  |        |        |  |  |  |  |  |  |  |                                                                                   |
| 1635 | 6 | 6p12.3              | 49025242 | 49060749 | 35508  | 2.29  | Y | L |  |        |        |  |  |  |  |  |  |  |                                                                                   |
| 1636 | 6 | 6p12.3              | 49109754 | 49129840 | 20087  | 0.11  | N | L |  |        |        |  |  |  |  |  |  |  |                                                                                   |
| 1637 | 6 | 6p12.3              | 49386530 | 49410241 | 23712  | 0.08  | N | L |  |        |        |  |  |  |  |  |  |  |                                                                                   |
| 1638 | 6 | 6p12.3              | 49830625 | 49845639 | 15015  | 0.06  | N | L |  |        |        |  |  |  |  |  |  |  |                                                                                   |
| 1639 | 6 | 6p12.3              | 50028354 | 50056854 | 28501  | 0.42  | N | L |  |        |        |  |  |  |  |  |  |  |                                                                                   |
| 1640 | 6 | 6p12.3              | 50132518 | 50146579 | 14062  | 0.06  | N | L |  |        |        |  |  |  |  |  |  |  |                                                                                   |
| 1641 | 6 | 6p12.2              | 51268084 | 51363392 | 95309  | 2.91  | Y | L |  |        |        |  |  |  |  |  |  |  |                                                                                   |
| 1642 | 6 | 6p12.2              | 51734419 | 51759641 | 25223  | 0.06  | N | L |  | 606702 | 606702 |  |  |  |  |  |  |  | Polycystic kidney<br>and hepatic disease,<br>263200 (3)                           |
| 1643 | 6 | 6p12.1              | 52794394 | 52799179 | 4786   | 0.11  | Y | G |  |        |        |  |  |  |  |  |  |  |                                                                                   |



|      |   |                   |          |          |        |       |   |   |        |        |                                     |
|------|---|-------------------|----------|----------|--------|-------|---|---|--------|--------|-------------------------------------|
| 1644 | 6 | 6p12.1            | 54115779 | 54147086 | 31308  | 0.08  | N | L |        |        |                                     |
| 1645 | 6 | 6p12.1            | 54321935 | 54387714 | 65780  | 0.75  | N | L | 606749 |        |                                     |
| 1646 | 6 | 6p12.1            | 54466961 | 54491014 | 24054  | 0.17  | N | L |        |        |                                     |
| 1647 | 6 | 6p12.1            | 54604445 | 54618456 | 14012  | 0.08  | N | L |        |        |                                     |
| 1648 | 6 | 6p12.1            | 55088188 | 55126419 | 38232  | 0.06  | N | L |        |        |                                     |
| 1649 | 6 | 6p12.1            | 55322941 | 55346477 | 23537  | 0.06  | N | L |        |        |                                     |
| 1650 | 6 | 6p12.1            | 55418859 | 55486592 | 67734  | 1.43  | Y | L |        |        |                                     |
| 1651 | 6 | 6p12.1            | 55606657 | 55631717 | 25061  | 0.14  | N | L |        |        |                                     |
| 1652 | 6 | 6p12.1            | 56024530 | 56058333 | 33804  | 0.14  | Y | L | 610002 |        |                                     |
| 1653 | 6 | 6p12.1            | 56161153 | 56185876 | 24724  | 0.22  | N | G | 610002 |        |                                     |
| 1654 | 6 | 6p11.2-<br>6p11.1 | 58363593 | 58708819 | 345227 | 0.11  | Y | G |        |        |                                     |
| 1655 | 6 | 6p11.1            | 58724642 | 58788678 | 64037  | 0.06  | Y | C |        |        |                                     |
| 1656 | 6 | 6q11.1            | 61945260 | 62042612 | 97353  | 0.59  | Y | L |        |        |                                     |
| 1657 | 6 | 6q11.1            | 62264452 | 62310836 | 46385  | 0.08  | Y | L |        |        |                                     |
| 1658 | 6 | 6q11.1            | 62383842 | 62424300 | 40459  | 0.28  | Y | L |        |        |                                     |
| 1659 | 6 | 6q11.1            | 62681805 | 62719597 | 37793  | 0.08  | N | L | 610487 |        |                                     |
| 1660 | 6 | 6q11.1            | 62796909 | 62853498 | 56590  | 4.70  | N | L | 610487 |        |                                     |
| 1661 | 6 | 6q11.1            | 63196151 | 63217764 | 21614  | 0.06  | N | L |        |        |                                     |
| 1662 | 6 | 6q11.1            | 63251914 | 63283361 | 31448  | 0.06  | N | C |        |        |                                     |
| 1663 | 6 | 6q11.1            | 63349574 | 63386122 | 36549  | 0.06  | N | L |        |        |                                     |
| 1664 | 6 | 6q11.2            | 63468516 | 63492370 | 23855  | 0.11  | N | L |        |        |                                     |
| 1665 | 6 | 6q12              | 63583511 | 63715562 | 132052 | 0.87  | Y | L |        |        |                                     |
| 1666 | 6 | 6q12              | 63767918 | 63797714 | 29797  | 0.06  | Y | L |        |        |                                     |
| 1667 | 6 | 6q12              | 63861788 | 63900003 | 38216  | 0.08  | Y | L |        |        |                                     |
| 1668 | 6 | 6q12              | 64743804 | 64764819 | 21016  | 0.36  | N | L |        |        |                                     |
| 1669 | 6 | 6q12              | 65099534 | 65136152 | 36619  | 0.98  | Y | L |        |        |                                     |
| 1670 | 6 | 6q12              | 65236981 | 65256457 | 19477  | 0.20  | N | L |        |        |                                     |
| 1671 | 6 | 6q12              | 65404355 | 65423001 | 18647  | 0.25  | Y | L |        |        |                                     |
| 1672 | 6 | 6q12              | 65557673 | 65636006 | 78334  | 0.70  | N | L |        |        |                                     |
| 1673 | 6 | 6q12              | 65893268 | 65962900 | 69633  | 3.27  | Y | L |        |        |                                     |
| 1674 | 6 | 6q12              | 65973056 | 65977073 | 4018   | 0.08  | N | L |        |        |                                     |
| 1675 | 6 | 6q12              | 66116893 | 66155811 | 38919  | 0.25  | Y | L | 612424 | 612424 | Retinitis pigmentosa-25, 602772 (3) |
| 1676 | 6 | 6q12              | 66455575 | 66473373 | 17799  | 7.57  | Y | L |        |        |                                     |
| 1677 | 6 | 6q12              | 66574418 | 66601071 | 26654  | 0.08  | N | L |        |        |                                     |
| 1678 | 6 | 6q12              | 66622157 | 66640377 | 18221  | 0.06  | Y | L |        |        |                                     |
| 1679 | 6 | 6q12              | 66665338 | 66686008 | 20671  | 0.06  | Y | L |        |        |                                     |
| 1680 | 6 | 6q12              | 67180065 | 67211139 | 31075  | 0.95  | N | L |        |        |                                     |
| 1681 | 6 | 6q12              | 67504953 | 67544342 | 39390  | 0.08  | N | L |        |        |                                     |
| 1682 | 6 | 6q12              | 67569490 | 67635043 | 65554  | 2.93  | Y | L |        |        |                                     |
| 1683 | 6 | 6q12              | 67728137 | 67746247 | 18111  | 0.31  | Y | L |        |        |                                     |
| 1684 | 6 | 6q12              | 67832565 | 67861137 | 28573  | 0.28  | Y | L |        |        |                                     |
| 1685 | 6 | 6q12              | 67914221 | 67925287 | 11067  | 0.06  | N | L |        |        |                                     |
| 1686 | 6 | 6q12              | 68141608 | 68168916 | 27309  | 1.37  | Y | L |        |        |                                     |
| 1687 | 6 | 6q12              | 68688786 | 68733165 | 44380  | 0.17  | Y | L |        |        |                                     |
| 1688 | 6 | 6q12              | 69084649 | 69099269 | 14621  | 0.14  | Y | L |        |        |                                     |
| 1689 | 6 | 6q12              | 69233497 | 69267214 | 33718  | 0.06  | Y | L |        |        |                                     |
| 1690 | 6 | 6q12              | 69482532 | 69507523 | 24992  | 0.42  | N | L | 602684 |        |                                     |
| 1691 | 6 | 6q13              | 70042690 | 70087338 | 44649  | 0.34  | Y | L | 602684 |        |                                     |
| 1692 | 6 | 6q13              | 72237836 | 72257757 | 19922  | 0.08  | N | L |        |        |                                     |
| 1693 | 6 | 6q13              | 72919055 | 72925280 | 6226   | 0.75  | Y | L | 606629 | 606629 | Cone-rod dystrophy 7, 603649 (3)    |
| 1694 | 6 | 6q13              | 73093086 | 73113269 | 20184  | 0.14  | N | L | 606629 | 606629 | Cone-rod dystrophy 7, 603649 (3)    |
| 1695 | 6 | 6q13              | 74547065 | 74560752 | 13688  | 0.22  | N | L | 608859 |        |                                     |
| 1696 | 6 | 6q13              | 74647041 | 74663166 | 16126  | 13.78 | Y | C |        |        |                                     |
| 1697 | 6 | 6q13              | 75117667 | 75134039 | 16373  | 0.14  | Y | L |        |        |                                     |
| 1698 | 6 | 6q13              | 75150633 | 75213398 | 62766  | 1.84  | Y | L |        |        |                                     |
| 1699 | 6 | 6q13              | 75441770 | 75506104 | 64335  | 0.53  | N | L |        |        |                                     |
| 1700 | 6 | 6q13              | 75699002 | 75732974 | 33973  | 0.17  | N | L |        |        |                                     |
| 1701 | 6 | 6q14.1            | 76941679 | 76974389 | 32711  | 0.64  | N | L |        |        |                                     |
| 1702 | 6 | 6q14.1            | 76989490 | 76993550 | 4061   | 0.06  | N | L |        |        |                                     |
| 1703 | 6 | 6q14.1            | 77054990 | 77090562 | 35573  | 3.86  | Y | L |        |        |                                     |
| 1704 | 6 | 6q14.1            | 77128094 | 77191820 | 63727  | 0.14  | Y | L |        |        |                                     |
| 1705 | 6 | 6q14.1            | 77336575 | 77359219 | 22645  | 0.17  | Y | L |        |        |                                     |
| 1706 | 6 | 6q14.1            | 77485918 | 77517630 | 31713  | 0.25  | Y | L |        |        |                                     |
| 1707 | 6 | 6q14.1            | 77526970 | 77556894 | 29925  | 0.61  | Y | L |        |        |                                     |
| 1708 | 6 | 6q14.1            | 77970945 | 77991964 | 21020  | 0.06  | N | L |        |        |                                     |
| 1709 | 6 | 6q14.1            | 78255483 | 78325492 | 70010  | 2.07  | Y | L |        |        |                                     |
| 1710 | 6 | 6q14.1            | 78672950 | 78714009 | 41060  | 0.31  | Y | L |        |        |                                     |
| 1711 | 6 | 6q14.1            | 78827708 | 78832918 | 5211   | 0.06  | N | L |        |        |                                     |
| 1712 | 6 | 6q14.1            | 78895378 | 78923188 | 27811  | 0.14  | Y | L |        |        |                                     |

|      |   |        |           |           |        |       |   |   |        |
|------|---|--------|-----------|-----------|--------|-------|---|---|--------|
| 1713 | 6 | 6q14.1 | 79026420  | 79091904  | 65485  | 5.31  | Y | L |        |
| 1714 | 6 | 6q14.1 | 79879643  | 79924156  | 44514  | 0.39  | N | L |        |
| 1715 | 6 | 6q14.1 | 81328339  | 81351118  | 22780  | 1.54  | Y | L |        |
| 1716 | 6 | 6q14.1 | 81499820  | 81532830  | 33011  | 0.17  | N | L |        |
| 1717 | 6 | 6q14.1 | 81599877  | 81658993  | 59117  | 0.28  | Y | L |        |
| 1718 | 6 | 6q14.1 | 81706363  | 81748226  | 41864  | 1.03  | N | L |        |
| 1719 | 6 | 6q14.1 | 81759548  | 81820172  | 60625  | 0.22  | N | L |        |
| 1720 | 6 | 6q14.1 | 82045674  | 82081937  | 36264  | 0.73  | N | L |        |
| 1721 | 6 | 6q14.1 | 82125126  | 82135159  | 10034  | 0.25  | N | L |        |
| 1722 | 6 | 6q14.1 | 82210424  | 82254120  | 43697  | 0.28  | Y | L |        |
| 1723 | 6 | 6q14.1 | 82258775  | 82323908  | 65134  | 0.20  | N | L |        |
| 1724 | 6 | 6q14.1 | 82447568  | 82498741  | 51174  | 3.58  | N | L |        |
| 1725 | 6 | 6q14.1 | 82551071  | 82592516  | 41446  | 0.89  | N | L |        |
| 1726 | 6 | 6q14.1 | 82672802  | 82709539  | 36738  | 0.22  | N | L |        |
| 1727 | 6 | 6q14.1 | 82781887  | 82811186  | 29300  | 2.46  | N | L |        |
| 1728 | 6 | 6q14.1 | 83721539  | 83767006  | 45468  | 0.20  | Y | L | 612495 |
| 1729 | 6 | 6q14.2 | 84178013  | 84191026  | 13014  | 0.06  | N | L | 154250 |
| 1730 | 6 | 6q14.3 | 85215743  | 85268111  | 52369  | 0.92  | N | L |        |
| 1731 | 6 | 6q14.3 | 85372323  | 85391621  | 19299  | 0.06  | Y | L |        |
| 1732 | 6 | 6q14.3 | 85681102  | 85709421  | 28320  | 0.22  | N | L |        |
| 1733 | 6 | 6q14.3 | 85983105  | 86027382  | 44278  | 2.60  | N | L |        |
| 1734 | 6 | 6q14.3 | 86923176  | 86950571  | 27396  | 0.11  | N | L |        |
| 1735 | 6 | 6q14.3 | 87080699  | 87142841  | 62143  | 0.34  | Y | L |        |
| 1736 | 6 | 6q14.3 | 87395345  | 87425313  | 29969  | 0.08  | N | L |        |
| 1737 | 6 | 6q15   | 90842072  | 90864165  | 22094  | 0.14  | N | L | 605394 |
| 1738 | 6 | 6q15   | 91474240  | 91491984  | 17745  | 0.17  | Y | L |        |
| 1739 | 6 | 6q15   | 91522913  | 91598746  | 75834  | 1.09  | Y | L |        |
| 1740 | 6 | 6q15   | 91939306  | 91983148  | 43843  | 0.17  | Y | L |        |
| 1741 | 6 | 6q16.1 | 92110631  | 92179404  | 68774  | 0.11  | Y | L |        |
| 1742 | 6 | 6q16.1 | 92340265  | 92418830  | 78566  | 4.36  | N | L |        |
| 1743 | 6 | 6q16.1 | 92743498  | 92772644  | 29147  | 0.22  | N | L |        |
| 1744 | 6 | 6q16.1 | 92913726  | 92934595  | 20870  | 0.06  | N | L |        |
| 1745 | 6 | 6q16.1 | 93052660  | 93059415  | 6756   | 0.11  | Y | L |        |
| 1746 | 6 | 6q16.1 | 93882684  | 93905664  | 22981  | 0.64  | N | L |        |
| 1747 | 6 | 6q16.1 | 94026078  | 94052181  | 26104  | 0.28  | N | L | 602190 |
| 1748 | 6 | 6q16.1 | 94084753  | 94119659  | 34907  | 0.11  | N | L | 602190 |
| 1749 | 6 | 6q16.1 | 94197566  | 94225728  | 28163  | 0.36  | N | L |        |
| 1750 | 6 | 6q16.1 | 94296022  | 94322634  | 26613  | 0.73  | N | L |        |
| 1751 | 6 | 6q16.1 | 94579027  | 94586660  | 7634   | 0.06  | N | L |        |
| 1752 | 6 | 6q16.1 | 94823810  | 94906512  | 82703  | 0.87  | N | L |        |
| 1753 | 6 | 6q16.1 | 94947495  | 95040458  | 92964  | 0.06  | Y | L |        |
| 1754 | 6 | 6q16.1 | 95380792  | 95426046  | 45255  | 0.42  | Y | L |        |
| 1755 | 6 | 6q16.1 | 95530420  | 95690872  | 160453 | 0.61  | Y | L |        |
| 1756 | 6 | 6q16.1 | 96197844  | 96218793  | 20950  | 0.06  | Y | L |        |
| 1757 | 6 | 6q16.1 | 96499552  | 96528054  | 28503  | 0.31  | Y | L |        |
| 1758 | 6 | 6q16.1 | 97092680  | 97105810  | 13131  | 0.25  | N | L |        |
| 1759 | 6 | 6q16.1 | 97864503  | 97893873  | 29371  | 0.11  | N | L |        |
| 1760 | 6 | 6q16.1 | 98410420  | 98439580  | 29161  | 0.06  | N | L |        |
| 1761 | 6 | 6q16.1 | 98537162  | 98568902  | 31741  | 0.11  | N | L |        |
| 1762 | 6 | 6q16.2 | 98861359  | 99047523  | 186165 | 2.52  | N | L |        |
| 1763 | 6 | 6q16.2 | 99281107  | 99313999  | 32893  | 0.22  | N | L |        |
| 1764 | 6 | 6q16.2 | 99589749  | 99629530  | 39782  | 0.08  | N | L |        |
| 1765 | 6 | 6q16.3 | 100627612 | 100645204 | 17593  | 0.28  | Y | L |        |
| 1766 | 6 | 6q16.3 | 100861748 | 100928992 | 67245  | 0.73  | N | L |        |
| 1767 | 6 | 6q16.3 | 101203890 | 101226230 | 22341  | 0.08  | N | L |        |
| 1768 | 6 | 6q16.3 | 101350449 | 101401010 | 50562  | 0.42  | N | L |        |
| 1769 | 6 | 6q16.3 | 102123628 | 102271961 | 148334 | 1.65  | N | L | 611092 |
| 1770 | 6 | 6q16.3 | 102449324 | 102480079 | 30756  | 0.08  | N | L | 611092 |
| 1771 | 6 | 6q16.3 | 102526006 | 102556787 | 30782  | 0.61  | N | L | 611092 |
| 1772 | 6 | 6q16.3 | 102570833 | 102599720 | 28888  | 0.48  | N | L | 611092 |
| 1773 | 6 | 6q16.3 | 102675462 | 102702720 | 27259  | 0.06  | N | L |        |
| 1774 | 6 | 6q16.3 | 103064825 | 103086815 | 21991  | 0.25  | N | L |        |
| 1775 | 6 | 6q16.3 | 103614467 | 103640724 | 26258  | 0.06  | Y | L |        |
| 1776 | 6 | 6q16.3 | 103652255 | 103669201 | 16947  | 0.11  | Y | L |        |
| 1777 | 6 | 6q16.3 | 103819643 | 103875376 | 55734  | 27.98 | Y | C |        |
| 1778 | 6 | 6q16.3 | 103976702 | 103991496 | 14795  | 0.78  | Y | L |        |
| 1779 | 6 | 6q16.3 | 104164073 | 104169168 | 5096   | 0.08  | Y | L |        |
| 1780 | 6 | 6q16.3 | 104304327 | 104388324 | 83998  | 0.75  | Y | L |        |
| 1781 | 6 | 6q16.3 | 104587381 | 104622398 | 35018  | 0.11  | Y | L |        |
| 1782 | 6 | 6q21   | 104810667 | 104817449 | 6783   | 0.06  | N | L |        |
| 1783 | 6 | 6q21   | 105156937 | 105186139 | 29203  | 0.06  | N | L |        |
| 1784 | 6 | 6q21   | 107282722 | 107285235 | 2514   | 0.06  | N | L |        |
| 1785 | 6 | 6q21   | 110146433 | 110163912 | 17480  | 0.06  | N | L | 612577 |
| 1786 | 6 | 6q21   | 110169244 | 110175479 | 6236   | 0.06  | N | L | 612577 |

|      |   |         |           |           |         |      |   |   |        |        |                                                              |
|------|---|---------|-----------|-----------|---------|------|---|---|--------|--------|--------------------------------------------------------------|
| 1787 | 6 | 6q21    | 112865920 | 112908811 | 42892   | 0.53 | N | L |        |        |                                                              |
| 1788 | 6 | 6q21    | 113712158 | 113739059 | 26902   | 0.17 | N | L |        |        |                                                              |
| 1789 | 6 | 6q21    | 113865146 | 113884441 | 19296   | 0.14 | N | L |        |        |                                                              |
| 1790 | 6 | 6q22.1  | 114025343 | 114045455 | 20113   | 0.06 | N | L |        |        |                                                              |
| 1791 | 6 | 6q22.1  | 114621707 | 114677067 | 55361   | 0.06 | Y | L |        |        |                                                              |
| 1792 | 6 | 6q22.1  | 114833677 | 116062450 | 1228774 | 1.12 | Y | L |        |        |                                                              |
| 1793 | 6 | 6q22.1  | 116584101 | 116650787 | 66687   | 0.22 | N | L |        |        |                                                              |
| 1794 | 6 | 6q22.31 | 119752622 | 119797654 | 45033   | 0.08 | N | L |        |        |                                                              |
| 1795 | 6 | 6q22.31 | 119838599 | 120299557 | 460959  | 0.39 | Y | L |        |        |                                                              |
| 1796 | 6 | 6q22.31 | 120316160 | 120339033 | 22874   | 0.06 | N | L |        |        |                                                              |
| 1797 | 6 | 6q22.31 | 120501367 | 120551533 | 50167   | 1.26 | N | L |        |        |                                                              |
| 1798 | 6 | 6q22.31 | 120714956 | 120777312 | 62357   | 0.08 | Y | L |        |        |                                                              |
| 1799 | 6 | 6q22.31 | 121334610 | 121350334 | 15725   | 0.08 | N | L |        |        |                                                              |
| 1800 | 6 | 6q22.31 | 122177516 | 122215387 | 37872   | 0.28 | N | L |        |        |                                                              |
| 1801 | 6 | 6q22.31 | 122261243 | 122286903 | 25661   | 0.06 | N | L |        |        |                                                              |
| 1802 | 6 | 6q22.31 | 122654276 | 122715322 | 61047   | 1.12 | N | L |        |        |                                                              |
| 1803 | 6 | 6q22.31 | 123616163 | 123678764 | 62602   | 0.08 | N | L |        |        | 603283                                                       |
| 1804 | 6 | 6q22.31 | 123961659 | 124041002 | 79344   | 1.79 | N | L |        |        | 603283                                                       |
| 1805 | 6 | 6q22.31 | 124392192 | 124442486 | 50295   | 0.22 | Y | L |        |        | 609758                                                       |
| 1806 | 6 | 6q22.31 | 124515180 | 124571941 | 56762   | 0.17 | Y | L |        |        | 609758                                                       |
| 1807 | 6 | 6q22.31 | 124793430 | 124829106 | 35677   | 0.84 | N | L |        |        | 609758                                                       |
| 1808 | 6 | 6q22.31 | 124946388 | 124957354 | 10967   | 0.22 | N | L |        |        | 609758                                                       |
| 1809 | 6 | 6q22.31 | 126037166 | 126053777 | 16612   | 0.17 | N | L |        |        |                                                              |
| 1810 | 6 | 6q22.32 | 126470699 | 126510457 | 39759   | 0.70 | N | L |        |        |                                                              |
| 1811 | 6 | 6q22.32 | 126796730 | 126830935 | 34206   | 0.34 | N | L |        |        |                                                              |
| 1812 | 6 | 6q22.32 | 127121034 | 127155862 | 34829   | 2.49 | N | L |        |        |                                                              |
| 1813 | 6 | 6q22.32 | 127269546 | 127294945 | 25400   | 0.06 | N | L |        |        |                                                              |
| 1814 | 6 | 6q22.33 | 127517504 | 127546523 | 29020   | 0.14 | N | L |        |        | 610574                                                       |
| 1815 | 6 | 6q22.33 | 127642323 | 127650844 | 8522    | 0.11 | N | L |        |        | 612137                                                       |
| 1816 | 6 | 6q22.33 | 127962618 | 128002956 | 40339   | 0.11 | N | L |        |        |                                                              |
| 1817 | 6 | 6q22.33 | 128251778 | 128260571 | 8794    | 0.06 | Y | L |        |        |                                                              |
| 1818 | 6 | 6q22.33 | 128353175 | 128381533 | 28359   | 0.08 | Y | L |        |        | 602545                                                       |
| 1819 | 6 | 6q22.33 | 128505518 | 128545649 | 40132   | 0.36 | N | L |        |        | 602545                                                       |
| 1820 | 6 | 6q22.33 | 128587236 | 128602695 | 15460   | 0.20 | N | L |        |        | 602545                                                       |
| 1821 | 6 | 6q22.33 | 129824496 | 129840123 | 15628   | 0.20 | Y | L | 156225 | 156225 | Muscular dystrophy, congenital merosin-deficient, 607855 (3) |
| 1822 | 6 | 6q22.33 | 129898817 | 129931105 | 32289   | 0.08 | N | L |        |        |                                                              |
| 1823 | 6 | 6q23.1  | 130648296 | 130667329 | 19034   | 0.06 | N | L |        |        |                                                              |
| 1824 | 6 | 6q23.1  | 130928745 | 130954491 | 25747   | 0.06 | N | L |        |        |                                                              |
| 1825 | 6 | 6q23.2  | 132362245 | 132392186 | 29942   | 0.06 | N | L |        |        |                                                              |
| 1826 | 6 | 6q23.2  | 132457707 | 132499611 | 41905   | 0.14 | N | L |        |        |                                                              |
| 1827 | 6 | 6q23.2  | 133056684 | 133063932 | 7249    | 0.28 | N | L | 603570 | 603570 | [High density lipoprotein cholesterol level QTL 8] (3)       |
| 1828 | 6 | 6q23.3  | 135383642 | 135401739 | 18098   | 0.14 | N | L |        |        | 612450                                                       |
| 1829 | 6 | 6q23.3  | 136158866 | 136457909 | 299044  | 0.14 | Y | L |        |        | 604645                                                       |
| 1830 | 6 | 6q24.1  | 139323101 | 139354397 | 31297   | 0.08 | N | L |        |        |                                                              |
| 1831 | 6 | 6q24.1  | 140664639 | 140720837 | 56199   | 0.50 | N | L |        |        |                                                              |
| 1832 | 6 | 6q24.1  | 140734031 | 140788674 | 54644   | 0.11 | N | L |        |        |                                                              |
| 1833 | 6 | 6q24.1  | 140812161 | 140879797 | 67637   | 0.17 | N | L |        |        |                                                              |
| 1834 | 6 | 6q24.1  | 140891395 | 140941614 | 50220   | 0.08 | N | L |        |        |                                                              |
| 1835 | 6 | 6q24.1  | 141337889 | 141368712 | 30824   | 0.98 | N | L |        |        |                                                              |
| 1836 | 6 | 6q24.1  | 141662069 | 141764651 | 102583  | 3.35 | N | C |        |        |                                                              |
| 1837 | 6 | 6q24.1  | 142204235 | 142347759 | 143525  | 0.06 | N | L |        |        |                                                              |
| 1838 | 6 | 6q24.1  | 142516139 | 142571150 | 55012   | 0.56 | N | L |        |        | 610902                                                       |
| 1839 | 6 | 6q24.2  | 143749166 | 143755398 | 6233    | 0.06 | N | L |        |        |                                                              |
| 1840 | 6 | 6q24.2  | 143890008 | 143902101 | 12094   | 0.08 | N | L |        |        |                                                              |
| 1841 | 6 | 6q24.2  | 145285032 | 145352783 | 67752   | 0.67 | N | L |        |        |                                                              |
| 1842 | 6 | 6q24.3  | 146243534 | 146296969 | 53436   | 0.53 | Y | L |        |        | 608048                                                       |
| 1843 | 6 | 6q24.3  | 147022940 | 147055013 | 32074   | 0.22 | N | L |        |        |                                                              |
| 1844 | 6 | 6q25.1  | 149512832 | 149522683 | 9852    | 0.06 | N | L |        |        |                                                              |
| 1845 | 6 | 6q25.1  | 149914638 | 149941450 | 26813   | 0.08 | N | C |        |        |                                                              |
| 1846 | 6 | 6q25.2  | 153882667 | 154113304 | 230638  | 0.17 | Y | C |        |        |                                                              |
| 1847 | 6 | 6q25.2  | 154163673 | 154169889 | 6217    | 1.17 | Y | L |        |        |                                                              |
| 1848 | 6 | 6q25.3  | 156110388 | 156144938 | 34551   | 0.22 | N | L |        |        |                                                              |
| 1849 | 6 | 6q25.3  | 160827431 | 160859217 | 31787   | 0.06 | Y | L |        |        | 611682                                                       |
| 1850 | 6 | 6q26    | 162482477 | 163268995 | 786519  | 1.15 | Y | C | 602544 | 602544 | Adenocarcinoma of lung, somatic, 211980 (3)                  |
| 1851 | 6 | 6q26    | 164363861 | 164371118 | 7258    | 0.06 | N | L |        |        |                                                              |

|      |   |               |           |           |         |      |   |   |        |        |                                     |
|------|---|---------------|-----------|-----------|---------|------|---|---|--------|--------|-------------------------------------|
| 1852 | 6 | 6q27          | 164460315 | 164476909 | 16595   | 0.36 | Y | L |        |        |                                     |
| 1853 | 6 | 6q27          | 164858591 | 164868292 | 9702    | 0.11 | N | L |        |        |                                     |
| 1854 | 6 | 6q27          | 165289117 | 165315933 | 26817   | 0.06 | N | L |        |        |                                     |
| 1855 | 6 | 6q27          | 165634114 | 165659019 | 24906   | 0.17 | Y | L |        |        |                                     |
| 1856 | 6 | 6q27          | 168427249 | 168443008 | 15760   | 0.06 | Y | G |        |        |                                     |
| 1857 | 6 | 6q27          | 169236122 | 169260029 | 23908   | 0.87 | Y | L |        |        |                                     |
| 1858 | 6 | 6q27          | 169940866 | 169974163 | 33298   | 0.06 | N | L |        |        |                                     |
| 1859 | 7 | 7p22.3        | 155737    | 163399    | 7663    | 0.06 | Y | L |        |        |                                     |
| 1860 | 7 | 7p22.2        | 2169895   | 2195181   | 25287   | 0.06 | N | L | 602686 | 602686 | Lymphoma, somatic (3)               |
| 1861 | 7 | 7p22.2        | 3360666   | 3376314   | 15649   | 0.06 | Y | C |        | 607216 |                                     |
| 1862 | 7 | 7p22.2        | 3422220   | 3455665   | 33446   | 0.06 | Y | L |        | 607216 |                                     |
| 1863 | 7 | 7p22.2        | 3715403   | 3832848   | 117446  | 0.08 | Y | L |        | 607216 |                                     |
| 1864 | 7 | 7p22.2        | 4342226   | 4499073   | 156848  | 0.17 | Y | C |        |        |                                     |
| 1865 | 7 | 7p22.1        | 4565064   | 4580496   | 15433   | 0.08 | Y | L |        |        |                                     |
| 1866 | 7 | 7p21.3        | 7221014   | 7355444   | 134431  | 0.17 | Y | L |        | 610555 |                                     |
| 1867 | 7 | 7p21.3        | 7420688   | 7458927   | 38240   | 0.06 | Y | L |        | 609996 |                                     |
| 1868 | 7 | 7p21.3        | 7919535   | 7945130   | 25596   | 0.14 | Y | L |        |        |                                     |
| 1869 | 7 | 7p21.3        | 8476409   | 8496156   | 19748   | 0.06 | N | L |        | 604639 |                                     |
| 1870 | 7 | 7p21.3        | 8499044   | 8580986   | 81943   | 3.66 | N | L |        | 604639 |                                     |
| 1871 | 7 | 7p21.3        | 8763057   | 8814530   | 51474   | 4.28 | Y | L |        |        |                                     |
| 1872 | 7 | 7p21.3        | 8908157   | 8917389   | 9233    | 0.08 | N | L |        |        |                                     |
| 1873 | 7 | 7p21.3        | 8958535   | 8960443   | 1909    | 0.08 | N | L |        |        |                                     |
| 1874 | 7 | 7p21.3        | 9067697   | 9146209   | 78513   | 0.17 | Y | L |        |        |                                     |
| 1875 | 7 | 7p21.3        | 9212088   | 9231973   | 19886   | 0.14 | Y | L |        |        |                                     |
| 1876 | 7 | 7p21.3        | 9372408   | 9538623   | 166216  | 0.39 | Y | L |        |        |                                     |
| 1877 | 7 | 7p21.3        | 9744380   | 9778239   | 33860   | 1.12 | Y | L |        |        |                                     |
| 1878 | 7 | 7p21.3        | 9882419   | 9894647   | 12229   | 0.06 | Y | L |        |        |                                     |
| 1879 | 7 | 7p21.3        | 10020897  | 10059910  | 39014   | 0.70 | Y | L |        |        |                                     |
| 1880 | 7 | 7p21.3        | 10434192  | 10461512  | 27321   | 0.39 | N | L |        |        |                                     |
| 1881 | 7 | 7p21.3        | 10523252  | 10561625  | 38374   | 1.09 | Y | L |        |        |                                     |
| 1882 | 7 | 7p21.3        | 10648934  | 10680330  | 31397   | 0.06 | N | L |        |        |                                     |
| 1883 | 7 | 7p21.3        | 11252702  | 11314157  | 61456   | 2.63 | Y | L |        |        |                                     |
| 1884 | 7 | 7p21.3        | 11437948  | 11481586  | 43639   | 0.17 | N | L | 612249 |        |                                     |
| 1885 | 7 | 7p21.3        | 11648289  | 11768235  | 119947  | 9.03 | N | L | 612249 |        |                                     |
| 1886 | 7 | 7p21.3        | 12221464  | 12270135  | 48672   | 0.08 | N | L |        |        |                                     |
| 1887 | 7 | 7p21.3        | 12858694  | 13217916  | 359223  | 0.17 | Y | L |        |        |                                     |
| 1888 | 7 | 7p21.3        | 13248772  | 13274540  | 25769   | 0.11 | N | L |        |        |                                     |
| 1889 | 7 | 7p21.2        | 13435802  | 13446558  | 10757   | 0.06 | Y | L |        |        |                                     |
| 1890 | 7 | 7p21.2        | 14244684  | 14247073  | 2390    | 0.36 | Y | L | 604070 |        |                                     |
| 1891 | 7 | 7p21.2        | 14934688  | 14965457  | 30770   | 0.06 | Y | L |        |        |                                     |
| 1892 | 7 | 7p21.2        | 14967768  | 15154059  | 186292  | 1.76 | Y | L |        |        |                                     |
| 1893 | 7 | 7p21.1        | 15452619  | 15476063  | 23445   | 1.98 | Y | L |        |        |                                     |
| 1894 | 7 | 7p21.1        | 15633793  | 15641355  | 7563    | 0.06 | N | L | 600535 |        |                                     |
| 1895 | 7 | 7p21.1        | 15982388  | 16010825  | 28438   | 0.08 | Y | L |        |        |                                     |
| 1896 | 7 | 7p21.1        | 16027533  | 16253636  | 226104  | 0.17 | Y | L |        |        |                                     |
| 1897 | 7 | 7p21.1        | 16315662  | 16368799  | 53138   | 1.73 | Y | L |        |        |                                     |
| 1898 | 7 | 7p21.1        | 17384282  | 17499830  | 115549  | 0.06 | Y | C |        |        |                                     |
| 1899 | 7 | 7p21.1        | 17615577  | 17641965  | 26389   | 0.31 | N | L |        |        |                                     |
| 1900 | 7 | 7p21.1        | 18630204  | 18707755  | 77552   | 0.92 | Y | L | 606543 |        |                                     |
| 1901 | 7 | 7p21.1        | 18778429  | 18810333  | 31905   | 0.50 | Y | L | 606543 |        |                                     |
| 1902 | 7 | 7p21.1        | 19475527  | 19482088  | 6562    | 0.08 | Y | L |        |        |                                     |
| 1903 | 7 | 7p15.3        | 19577987  | 19615885  | 37899   | 0.28 | Y | L |        |        |                                     |
| 1904 | 7 | 7p15.3        | 19852020  | 19906337  | 54318   | 0.06 | N | L |        |        |                                     |
| 1905 | 7 | 7p15.3        | 20046060  | 20095872  | 49813   | 0.08 | N | L |        |        |                                     |
| 1906 | 7 | 7p15.3        | 20267770  | 20298291  | 30522   | 0.39 | N | L |        |        |                                     |
| 1907 | 7 | 7p15.3        | 23071682  | 23087567  | 15886   | 0.17 | N | L |        |        |                                     |
| 1908 | 7 | 7p15.3        | 23815690  | 23858447  | 42758   | 0.45 | Y | L | 605790 |        |                                     |
| 1909 | 7 | 7p15.3        | 23870481  | 23882268  | 11788   | 0.06 | N | L |        |        |                                     |
| 1910 | 7 | 7p15.2        | 25095313  | 25123406  | 28094   | 0.06 | N | C |        |        |                                     |
| 1911 | 7 | 7p15.2        | 25628501  | 25666811  | 38311   | 0.11 | N | L |        |        |                                     |
| 1912 | 7 | 7p15.2        | 26578494  | 26590653  | 12160   | 0.08 | Y | L |        |        |                                     |
| 1913 | 7 | 7p15.2        | 27955464  | 27971475  | 16012   | 0.28 | N | L | 606246 | 606246 | Endometrial stromal tumors (2)      |
| 1914 | 7 | 7p15.1        | 28635027  | 28644247  | 9221    | 0.06 | N | L |        |        |                                     |
| 1915 | 7 | 7p15.1        | 31439426  | 31459977  | 20552   | 0.39 | N | L |        |        |                                     |
| 1916 | 7 | 7p15.1-7p14.3 | 31794059  | 31849453  | 55395   | 0.56 | N | L | 602987 |        |                                     |
| 1917 | 7 | 7p14.3        | 32028491  | 32036165  | 7675    | 0.08 | N | L | 602987 |        |                                     |
| 1918 | 7 | 7p14.3        | 32327864  | 32335673  | 7810    | 0.08 | Y | L |        |        |                                     |
| 1919 | 7 | 7p14.3        | 32349712  | 32365499  | 15788   | 0.11 | Y | L |        |        |                                     |
| 1920 | 7 | 7p14.3        | 33130258  | 34899477  | 1769220 | 0.42 | Y | L | 607968 | 607968 | Bardet-Biedl syndrome 9, 209900 (3) |

|      |   |                    |          |          |        |       |   |   |        |
|------|---|--------------------|----------|----------|--------|-------|---|---|--------|
| 1921 | 7 | 7p14.3             | 35094878 | 35171075 | 76198  | 0.22  | N | L |        |
| 1922 | 7 | 7p14.1             | 37871945 | 37900192 | 28248  | 0.06  | Y | L | 610852 |
| 1923 | 7 | 7p14.1             | 38252982 | 38282253 | 29272  | 3.83  | Y | C | 609642 |
| 1924 | 7 | 7p14.1             | 38323855 | 38335261 | 11407  | 0.06  | Y | C |        |
| 1925 | 7 | 7p14.1             | 38356207 | 38367412 | 11206  | 3.94  | Y | L |        |
| 1926 | 7 | 7p14.1             | 40094292 | 40116812 | 22521  | 0.11  | Y | L | 603309 |
| 1927 | 7 | 7p13               | 46494970 | 46542016 | 47047  | 0.14  | N | L |        |
| 1928 | 7 | 7p12.3             | 48531606 | 48576570 | 44965  | 0.17  | Y | L | 607807 |
| 1929 | 7 | 7p12.3             | 49056940 | 49073056 | 16117  | 0.08  | N | L |        |
| 1930 | 7 | 7p12.3             | 49085886 | 49102243 | 16358  | 0.06  | N | L |        |
| 1931 | 7 | 7p12.3             | 49183816 | 49209681 | 25866  | 0.45  | N | L |        |
| 1932 | 7 | 7p12.3             | 49427357 | 49454381 | 27025  | 0.08  | Y | L |        |
| 1933 | 7 | 7p12.1             | 51553691 | 51596701 | 43011  | 0.08  | Y | L |        |
| 1934 | 7 | 7p12.1             | 51746344 | 51768731 | 22388  | 0.11  | Y | L |        |
| 1935 | 7 | 7p12.1             | 52607806 | 52619364 | 11559  | 0.08  | Y | L |        |
| 1936 | 7 | 7p12.1             | 53216221 | 53602768 | 386548 | 0.31  | Y | L |        |
| 1937 | 7 | 7p12.1-<br>7p11.2  | 53780777 | 53937015 | 156239 | 0.06  | Y | L |        |
| 1938 | 7 | 7p11.2             | 54095333 | 54105342 | 10010  | 0.17  | Y | L |        |
| 1939 | 7 | 7p11.2             | 54195111 | 54228774 | 33664  | 0.45  | N | L |        |
| 1940 | 7 | 7p11.2             | 54383961 | 54401034 | 17074  | 0.06  | N | L |        |
| 1941 | 7 | 7p11.2             | 56661298 | 56702622 | 41325  | 0.08  | Y | L |        |
| 1942 | 7 | 7p11.2             | 56821754 | 56859910 | 38157  | 0.06  | Y | C |        |
| 1943 | 7 | 7p11.2             | 57249220 | 57256623 | 7404   | 0.08  | Y | C |        |
| 1944 | 7 | 7p11.1             | 57923922 | 58019068 | 95147  | 0.08  | Y | L |        |
| 1945 | 7 | 7q11.1-<br>7q11.21 | 61070223 | 61375522 | 305300 | 2.43  | Y | C |        |
| 1946 | 7 | 7q11.21            | 61477798 | 62103603 | 625806 | 7.15  | Y | L |        |
| 1947 | 7 | 7q11.21            | 63213067 | 63299591 | 86525  | 0.14  | Y | C |        |
| 1948 | 7 | 7q11.21            | 63387952 | 63490141 | 102190 | 0.06  | Y | C |        |
| 1949 | 7 | 7q11.21            | 64232364 | 64627797 | 395434 | 0.75  | Y | C | 603974 |
| 1950 | 7 | 7q11.21            | 65927527 | 65934791 | 7265   | 0.08  | N | C |        |
| 1951 | 7 | 7q11.22            | 71285932 | 71293938 | 8007   | 0.22  | N | L | 607176 |
| 1952 | 7 | 7q11.23            | 71872678 | 71939072 | 66395  | 0.06  | Y | L |        |
| 1953 | 7 | 7q11.23            | 75891531 | 76054557 | 163027 | 26.24 | Y | C | 182889 |
| 1954 | 7 | 7q11.23            | 76128663 | 76255687 | 127025 | 0.20  | Y | L |        |
| 1955 | 7 | 7q11.23            | 76284258 | 76412137 | 127880 | 0.45  | Y | C |        |
| 1956 | 7 | 7q21.11            | 77541016 | 77551842 | 10827  | 0.11  | N | L | 606382 |
| 1957 | 7 | 7q21.11            | 77707944 | 77774603 | 66660  | 0.22  | N | L | 606382 |
| 1958 | 7 | 7q21.11            | 77805387 | 77823800 | 18414  | 0.22  | N | C | 606382 |
| 1959 | 7 | 7q21.11            | 77944029 | 77962360 | 18332  | 0.42  | N | L | 606382 |
| 1960 | 7 | 7q21.11            | 78392487 | 78479845 | 87359  | 2.10  | Y | L | 606382 |
| 1961 | 7 | 7q21.11            | 78621037 | 78664729 | 43693  | 0.87  | Y | L | 606382 |
| 1962 | 7 | 7q21.11            | 79076650 | 79235872 | 159223 | 0.06  | Y | C |        |
| 1963 | 7 | 7q21.11            | 79239729 | 79307725 | 67997  | 0.70  | Y | L |        |
| 1964 | 7 | 7q21.11            | 79662050 | 79674262 | 12213  | 0.06  | N | L | 139310 |
| 1965 | 7 | 7q21.11            | 80141761 | 80187045 | 45285  | 0.08  | N | L |        |
| 1966 | 7 | 7q21.11            | 81099833 | 81152424 | 52592  | 0.31  | N | L |        |
| 1967 | 7 | 7q21.11            | 82324763 | 82386862 | 62100  | 0.42  | Y | L | 604918 |
| 1968 | 7 | 7q21.11            | 82452185 | 82473177 | 20993  | 0.06  | N | L | 604918 |
| 1969 | 7 | 7q21.11            | 83564904 | 83573829 | 8926   | 0.31  | N | L | 603961 |
| 1970 | 7 | 7q21.11            | 83740349 | 83765052 | 24704  | 0.22  | N | L |        |
| 1971 | 7 | 7q21.11            | 83956942 | 83996116 | 39175  | 0.36  | N | L |        |
| 1972 | 7 | 7q21.11            | 84020960 | 84118379 | 97420  | 2.54  | Y | L |        |
| 1973 | 7 | 7q21.11            | 84277591 | 84295197 | 17607  | 0.45  | Y | L |        |
| 1974 | 7 | 7q21.11            | 84477429 | 84506381 | 28953  | 0.45  | N | L | 609907 |
| 1975 | 7 | 7q21.11            | 84670833 | 84714227 | 43395  | 0.06  | N | L |        |
| 1976 | 7 | 7q21.11            | 84908672 | 84977604 | 68933  | 4.28  | N | L |        |
| 1977 | 7 | 7q21.11            | 85012769 | 85028971 | 16203  | 0.56  | Y | L |        |
| 1978 | 7 | 7q21.11            | 85037284 | 85057531 | 20248  | 0.17  | Y | L |        |
| 1979 | 7 | 7q21.11            | 85446098 | 85467288 | 21191  | 0.06  | N | L |        |
| 1980 | 7 | 7q21.11            | 85494392 | 85579164 | 84773  | 0.42  | N | L |        |
| 1981 | 7 | 7q21.11            | 85867181 | 85896225 | 29045  | 0.28  | N | L |        |
| 1982 | 7 | 7q21.12            | 86212877 | 86244019 | 31143  | 0.20  | N | L | 601115 |
| 1983 | 7 | 7q21.12            | 87923303 | 87938396 | 15094  | 0.06  | Y | L |        |
| 1984 | 7 | 7q21.13            | 88039177 | 88053511 | 14335  | 0.11  | Y | L |        |
| 1985 | 7 | 7q21.13            | 88382093 | 88470240 | 88148  | 6.76  | Y | L |        |
| 1986 | 7 | 7q21.13            | 88517727 | 88552838 | 35112  | 0.06  | Y | L |        |
| 1987 | 7 | 7q21.13            | 88800975 | 88806175 | 5201   | 0.06  | Y | L |        |
| 1988 | 7 | 7q21.13            | 88974375 | 89002161 | 27787  | 0.20  | Y | L |        |
| 1989 | 7 | 7q21.13            | 89053814 | 89169690 | 115877 | 1.01  | Y | L |        |
| 1990 | 7 | 7q21.13            | 89474953 | 89553609 | 78657  | 7.27  | Y | L |        |
| 1991 | 7 | 7q21.13            | 89942560 | 89973493 | 30934  | 0.06  | Y | L |        |
| 1992 | 7 | 7q21.13            | 90866961 | 90893594 | 26634  | 6.90  | Y | L |        |

|      |   |               |           |           |        |      |   |   |        |        |                                                            |  |
|------|---|---------------|-----------|-----------|--------|------|---|---|--------|--------|------------------------------------------------------------|--|
| 1993 | 7 | 7q21.2        | 91002836  | 91029600  | 26765  | 0.06 | Y | L |        |        |                                                            |  |
| 1994 | 7 | 7q21.2        | 91134605  | 91154481  | 19877  | 0.06 | N | L |        |        |                                                            |  |
| 1995 | 7 | 7q21.3        | 92605438  | 92685958  | 80521  | 1.09 | N | L | 611170 |        |                                                            |  |
| 1996 | 7 | 7q21.3        | 92910385  | 93006702  | 96318  | 5.25 | N | L | 114131 | 114131 | {Osteoporosis, postmenopausal, susceptibility}, 166710 (3) |  |
| 1997 | 7 | 7q21.3        | 93018961  | 93067476  | 48516  | 0.14 | Y | C | 114131 | 114131 | {Osteoporosis, postmenopausal, susceptibility}, 166710 (3) |  |
| 1998 | 7 | 7q21.3        | 93079576  | 93106687  | 27112  | 0.59 | N | L |        |        |                                                            |  |
| 1999 | 7 | 7q21.3        | 93197967  | 93231445  | 33479  | 0.11 | N | L |        |        |                                                            |  |
| 2000 | 7 | 7q21.3        | 93267250  | 93294931  | 27682  | 0.45 | Y | L |        |        |                                                            |  |
| 2001 | 7 | 7q21.3        | 93410121  | 93449846  | 39726  | 0.84 | N | L |        |        |                                                            |  |
| 2002 | 7 | 7q21.3        | 93595650  | 93650522  | 54873  | 0.17 | Y | L |        |        |                                                            |  |
| 2003 | 7 | 7q21.3        | 94670766  | 94721750  | 50985  | 0.20 | N | L | 602468 |        |                                                            |  |
| 2004 | 7 | 7q21.3        | 95936192  | 96010990  | 74799  | 0.92 | N | L |        |        |                                                            |  |
| 2005 | 7 | 7q21.3        | 97229156  | 97277353  | 48198  | 0.20 | Y | L |        |        |                                                            |  |
| 2006 | 7 | 7q22.1        | 100414772 | 100456577 | 41806  | 0.34 | Y | C | 608424 |        |                                                            |  |
| 2007 | 7 | 7q22.1        | 100462709 | 100468192 | 5484   | 0.06 | Y | C | 608424 |        |                                                            |  |
| 2008 | 7 | 7q22.1        | 102594352 | 102631742 | 37391  | 0.08 | Y | L |        |        |                                                            |  |
| 2009 | 7 | 7q22.1        | 103276965 | 103337002 | 60038  | 0.45 | N | L | 600514 | 600514 | Lissencephaly syndrome, Norman-Roberts type, 257320 (3)    |  |
| 2010 | 7 | 7q22.1        | 103825808 | 103835014 | 9207   | 0.08 | N | L | 609719 |        |                                                            |  |
| 2011 | 7 | 7q22.1        | 104255975 | 104258936 | 2962   | 0.06 | Y | G | 609719 |        |                                                            |  |
| 2012 | 7 | 7q22.2        | 105401783 | 105412800 | 11018  | 0.06 | Y | L |        |        |                                                            |  |
| 2013 | 7 | 7q22.2-7q22.3 | 105870293 | 105916912 | 46620  | 0.31 | N | L |        |        |                                                            |  |
| 2014 | 7 | 7q22.3        | 106025298 | 106076986 | 51689  | 0.06 | N | L |        |        |                                                            |  |
| 2015 | 7 | 7q31.1        | 107238281 | 107258041 | 19761  | 0.25 | Y | L |        |        |                                                            |  |
| 2016 | 7 | 7q31.1        | 108382881 | 108474112 | 91232  | 0.22 | Y | C |        |        |                                                            |  |
| 2017 | 7 | 7q31.1        | 108743546 | 108802317 | 58772  | 0.11 | Y | L |        |        |                                                            |  |
| 2018 | 7 | 7q31.1        | 109217349 | 109245414 | 28066  | 1.03 | Y | L |        |        |                                                            |  |
| 2019 | 7 | 7q31.1        | 110186603 | 110333349 | 146747 | 3.35 | Y | L | 605977 |        |                                                            |  |
| 2020 | 7 | 7q31.1        | 110613474 | 111111892 | 498419 | 0.73 | Y | C | 605977 |        |                                                            |  |
| 2021 | 7 | 7q31.1        | 112706516 | 112779851 | 73336  | 0.08 | Y | L |        |        |                                                            |  |
| 2022 | 7 | 7q31.1        | 113316559 | 113341935 | 25377  | 0.06 | N | L | 600917 | 600917 | Insulin resistance, severe, digenic, 604367 (3)            |  |
| 2023 | 7 | 7q31.1        | 114207109 | 114239333 | 32225  | 0.73 | N | L |        |        |                                                            |  |
| 2024 | 7 | 7q31.2        | 114559859 | 114583126 | 23268  | 0.36 | N | L |        |        |                                                            |  |
| 2025 | 7 | 7q31.2        | 114625761 | 114715935 | 90175  | 0.67 | N | L |        |        |                                                            |  |
| 2026 | 7 | 7q31.2        | 114748260 | 114788352 | 40093  | 0.45 | N | L |        |        |                                                            |  |
| 2027 | 7 | 7q31.2        | 114961243 | 114977131 | 15889  | 0.08 | N | L |        |        |                                                            |  |
| 2028 | 7 | 7q31.2        | 115033446 | 115069436 | 35991  | 0.11 | N | L |        |        |                                                            |  |
| 2029 | 7 | 7q31.2        | 115099106 | 115131588 | 32483  | 0.28 | N | L |        |        |                                                            |  |
| 2030 | 7 | 7q31.2        | 115315878 | 115350783 | 34906  | 0.22 | Y | L |        |        |                                                            |  |
| 2031 | 7 | 7q31.2        | 115371804 | 115412360 | 40557  | 0.11 | Y | L | 604732 |        |                                                            |  |
| 2032 | 7 | 7q31.2        | 115892480 | 115942019 | 49540  | 0.64 | N | L | 601048 |        |                                                            |  |
| 2033 | 7 | 7q31.2        | 116315476 | 116372909 | 57434  | 0.14 | Y | L | 601571 |        |                                                            |  |
| 2034 | 7 | 7q31.2        | 116744048 | 116814236 | 70189  | 0.11 | N | L | 147870 |        |                                                            |  |
| 2035 | 7 | 7q31.31       | 117325663 | 117367724 | 42062  | 0.14 | N | L |        |        |                                                            |  |
| 2036 | 7 | 7q31.31       | 117427231 | 117467505 | 40275  | 0.45 | N | L |        |        |                                                            |  |
| 2037 | 7 | 7q31.31       | 117857460 | 117973796 | 116337 | 1.90 | Y | L |        |        |                                                            |  |
| 2038 | 7 | 7q31.31       | 118153042 | 118170401 | 17360  | 0.78 | Y | L |        |        |                                                            |  |
| 2039 | 7 | 7q31.31       | 118437668 | 118453195 | 15528  | 0.20 | N | L |        |        |                                                            |  |
| 2040 | 7 | 7q31.31       | 118505822 | 118570597 | 64776  | 0.42 | Y | L |        |        |                                                            |  |
| 2041 | 7 | 7q31.31       | 119064373 | 119111242 | 46870  | 0.22 | N | L |        |        |                                                            |  |
| 2042 | 7 | 7q31.31       | 119181267 | 119239431 | 58165  | 1.93 | N | L |        |        |                                                            |  |
| 2043 | 7 | 7q31.31       | 119778993 | 119841692 | 62700  | 1.15 | N | L | 605410 |        |                                                            |  |
| 2044 | 7 | 7q31.31       | 120613056 | 120655239 | 42184  | 0.31 | N | L |        |        |                                                            |  |
| 2045 | 7 | 7q31.31       | 120688589 | 120709104 | 20516  | 0.08 | Y | L |        |        |                                                            |  |
| 2046 | 7 | 7q31.31       | 120847107 | 120868937 | 21831  | 0.20 | Y | L |        |        |                                                            |  |
| 2047 | 7 | 7q31.32       | 120910182 | 120982699 | 72518  | 0.06 | Y | L |        |        |                                                            |  |
| 2048 | 7 | 7q31.32       | 121916764 | 122032256 | 115493 | 1.23 | N | L | 609978 |        |                                                            |  |
| 2049 | 7 | 7q31.32       | 122129139 | 122153642 | 24504  | 0.08 | N | L | 609978 |        |                                                            |  |
| 2050 | 7 | 7q31.32       | 122167960 | 122181385 | 13426  | 0.06 | N | L | 609978 |        |                                                            |  |
| 2051 | 7 | 7q31.32       | 122403878 | 122451593 | 47716  | 1.23 | N | L | 604867 |        |                                                            |  |
| 2052 | 7 | 7q31.32       | 122676936 | 122679969 | 3034   | 0.08 | N | L |        |        |                                                            |  |
| 2053 | 7 | 7q31.32       | 123372712 | 123401123 | 28412  | 0.64 | N | L | 600930 |        |                                                            |  |
| 2054 | 7 | 7q31.32-      | 123570261 | 123679755 | 109495 | 0.45 | N | C |        |        |                                                            |  |

|      |   |         |           |           |         |       |   |   |        |        |  |  |                                                              |
|------|---|---------|-----------|-----------|---------|-------|---|---|--------|--------|--|--|--------------------------------------------------------------|
|      |   | 7q31.33 |           |           |         |       |   |   |        |        |  |  |                                                              |
| 2055 | 7 | 7q31.33 | 123715566 | 123737524 | 21959   | 0.25  | N | L |        |        |  |  |                                                              |
| 2056 | 7 | 7q31.33 | 124182689 | 124320916 | 138228  | 0.25  | N | L | 602583 |        |  |  |                                                              |
| 2057 | 7 | 7q31.33 | 124558916 | 124641052 | 82137   | 0.08  | Y | L |        |        |  |  |                                                              |
| 2058 | 7 | 7q31.33 | 124696968 | 124717869 | 20902   | 0.06  | Y | L |        |        |  |  |                                                              |
| 2059 | 7 | 7q31.33 | 124943289 | 124960420 | 17132   | 0.06  | Y | L |        |        |  |  |                                                              |
| 2060 | 7 | 7q31.33 | 125187870 | 125361282 | 173413  | 0.34  | Y | L |        |        |  |  |                                                              |
| 2061 | 7 | 7q31.33 | 125748279 | 125787689 | 39411   | 0.17  | N | L |        |        |  |  |                                                              |
| 2062 | 7 | 7q31.33 | 125853978 | 125940844 | 86867   | 2.77  | Y | L | 601116 |        |  |  |                                                              |
| 2063 | 7 | 7q31.33 | 126025340 | 126064268 | 38929   | 11.38 | Y | L | 601116 |        |  |  |                                                              |
| 2064 | 7 | 7q31.33 | 126268781 | 126304897 | 36117   | 0.06  | Y | L | 601116 |        |  |  |                                                              |
| 2065 | 7 | 7q31.33 | 126428891 | 126444823 | 15933   | 0.06  | Y | L | 601116 |        |  |  |                                                              |
| 2066 | 7 | 7q32.1  | 127301429 | 127344729 | 43301   | 0.34  | N | L | 602181 |        |  |  |                                                              |
| 2067 | 7 | 7q33    | 133421147 | 133465931 | 44785   | 5.51  | Y | C |        |        |  |  |                                                              |
| 2068 | 7 | 7q33    | 133960652 | 133975845 | 15194   | 0.06  | Y | L |        |        |  |  |                                                              |
| 2069 | 7 | 7q33    | 135704394 | 135715222 | 10829   | 0.11  | N | L |        |        |  |  |                                                              |
| 2070 | 7 | 7q33    | 135796403 | 135821740 | 25338   | 0.11  | N | L |        |        |  |  |                                                              |
| 2071 | 7 | 7q33    | 136339921 | 136416112 | 76192   | 2.85  | N | L | 608516 |        |  |  |                                                              |
| 2072 | 7 | 7q33    | 136438328 | 136451373 | 13046   | 0.64  | N | L |        |        |  |  |                                                              |
| 2073 | 7 | 7q33    | 136540537 | 136575086 | 34550   | 0.89  | Y | L | 162095 |        |  |  |                                                              |
| 2074 | 7 | 7q34    | 141401976 | 141444073 | 42098   | 5.62  | Y | C | 154360 |        |  |  |                                                              |
| 2075 | 7 | 7q34    | 141592698 | 141599096 | 6399    | 0.11  | Y | L |        |        |  |  |                                                              |
| 2076 | 7 | 7q34    | 141691433 | 141722029 | 30597   | 48.32 | Y | C |        |        |  |  |                                                              |
| 2077 | 7 | 7q34    | 141890413 | 141909357 | 18945   | 2.07  | Y | C |        |        |  |  |                                                              |
| 2078 | 7 | 7q34    | 141947585 | 141970907 | 23323   | 0.06  | Y | G |        |        |  |  |                                                              |
| 2079 | 7 | 7q34    | 142155613 | 142176424 | 20812   | 50.08 | Y | C |        |        |  |  |                                                              |
| 2080 | 7 | 7q35    | 143364646 | 143370870 | 6225    | 0.53  | Y | L |        |        |  |  |                                                              |
| 2081 | 7 | 7q35    | 145082634 | 145111022 | 28389   | 0.11  | N | L |        |        |  |  |                                                              |
| 2082 | 7 | 7q35    | 145796019 | 146078397 | 282379  | 0.11  | Y | L | 612100 |        |  |  |                                                              |
| 2083 | 7 | 7q35    | 146704296 | 146715414 | 11119   | 0.42  | N | L | 612100 |        |  |  |                                                              |
| 2084 | 7 | 7q36.1  | 149285763 | 149340182 | 54420   | 0.06  | Y | G |        |        |  |  |                                                              |
| 2085 | 7 | 7q36.1  | 149931851 | 149943582 | 11732   | 0.14  | Y | L |        |        |  |  |                                                              |
| 2086 | 7 | 7q36.2  | 152298891 | 152314343 | 15453   | 0.08  | N | L |        |        |  |  |                                                              |
| 2087 | 7 | 7q36.2  | 152787514 | 152798313 | 10800   | 0.06  | Y | C |        |        |  |  |                                                              |
| 2088 | 7 | 7q36.2  | 152949394 | 152973402 | 24009   | 0.11  | N | L |        |        |  |  |                                                              |
| 2089 | 7 | 7q36.2  | 153155811 | 153288413 | 132603  | 0.08  | Y | C |        |        |  |  |                                                              |
| 2090 | 7 | 7q36.2  | 154020828 | 154034857 | 14030   | 10.96 | Y | C | 126141 | 126141 |  |  | Ventricular fibrillation, paroxysmal familial, 2, 612956 (3) |
| 2091 | 7 | 7q36.3  | 158390045 | 158412114 | 22070   | 0.14  | Y | C |        |        |  |  |                                                              |
| 2092 | 8 | 8p23.3  | 1285546   | 1304736   | 19191   | 0.11  | N | G |        |        |  |  |                                                              |
| 2093 | 8 | 8p23.3  | 1575284   | 1600639   | 25356   | 0.20  | Y | L | 605438 |        |  |  |                                                              |
| 2094 | 8 | 8p23.3  | 1970178   | 2168002   | 197825  | 0.45  | Y | C | 603509 |        |  |  |                                                              |
| 2095 | 8 | 8p23.2  | 2241847   | 2258274   | 16428   | 0.08  | Y | L |        |        |  |  |                                                              |
| 2096 | 8 | 8p23.2  | 2277246   | 2284698   | 7453    | 0.06  | Y | L |        |        |  |  |                                                              |
| 2097 | 8 | 8p23.2  | 2310084   | 2417414   | 107331  | 0.31  | Y | C |        |        |  |  |                                                              |
| 2098 | 8 | 8p23.2  | 3023076   | 3213612   | 190537  | 0.08  | Y | L | 608397 |        |  |  |                                                              |
| 2099 | 8 | 8p23.2  | 3247306   | 3259949   | 12644   | 0.08  | N | L | 608397 |        |  |  |                                                              |
| 2100 | 8 | 8p23.2  | 3674807   | 5938893   | 2264087 | 11.35 | Y | C |        |        |  |  |                                                              |
| 2101 | 8 | 8p23.2  | 6047363   | 6187711   | 140349  | 0.45  | Y | C |        |        |  |  |                                                              |
| 2102 | 8 | 8p23.1  | 6803783   | 6844453   | 40671   | 2.07  | Y | L | 125220 |        |  |  |                                                              |
| 2103 | 8 | 8p23.1  | 6986630   | 8106541   | 1119912 | 9.70  | Y | C | 606611 |        |  |  |                                                              |
| 2104 | 8 | 8p23.1  | 8355227   | 8453220   | 97994   | 0.06  | Y | L |        |        |  |  |                                                              |
| 2105 | 8 | 8p23.1  | 8494490   | 8543911   | 49422   | 0.06  | N | L |        |        |  |  |                                                              |
| 2106 | 8 | 8p23.1  | 8890266   | 8912382   | 22117   | 0.34  | N | L | 608739 |        |  |  |                                                              |
| 2107 | 8 | 8p23.1  | 9343409   | 9351023   | 7615    | 0.06  | N | L |        |        |  |  |                                                              |
| 2108 | 8 | 8p23.1  | 9446656   | 9462981   | 16326   | 0.06  | N | L | 603303 |        |  |  |                                                              |
| 2109 | 8 | 8p23.1  | 9769752   | 9783208   | 13457   | 0.06  | N | L |        |        |  |  |                                                              |
| 2110 | 8 | 8p23.1  | 12023655  | 12526350  | 502696  | 19.62 | Y | C | 610186 |        |  |  |                                                              |
| 2111 | 8 | 8p23.1  | 12590409  | 12607443  | 17035   | 0.59  | Y | C |        |        |  |  |                                                              |
| 2112 | 8 | 8p23.1  | 12677322  | 12693532  | 16211   | 0.08  | Y | L |        |        |  |  |                                                              |
| 2113 | 8 | 8p22    | 13442070  | 13454798  | 12729   | 0.17  | Y | G |        |        |  |  |                                                              |
| 2114 | 8 | 8p22    | 13791052  | 13877219  | 86168   | 3.24  | Y | L |        |        |  |  |                                                              |
| 2115 | 8 | 8p22    | 13910499  | 13962387  | 51889   | 0.08  | Y | L |        |        |  |  |                                                              |
| 2116 | 8 | 8p22    | 14129768  | 14145881  | 16114   | 0.08  | N | L | 608113 |        |  |  |                                                              |
| 2117 | 8 | 8p22    | 14391173  | 14431172  | 40000   | 1.01  | Y | C | 608113 |        |  |  |                                                              |
| 2118 | 8 | 8p22    | 14505683  | 14517871  | 12189   | 0.06  | N | L | 608113 |        |  |  |                                                              |
| 2119 | 8 | 8p22    | 14594527  | 14677944  | 83418   | 0.78  | Y | C | 608113 |        |  |  |                                                              |
| 2120 | 8 | 8p22    | 14698345  | 14733048  | 34704   | 0.08  | Y | L | 608113 |        |  |  |                                                              |
| 2121 | 8 | 8p22    | 15439042  | 15478111  | 39070   | 0.11  | Y | L | 611093 | 611093 |  |  | Mental retardation, autosomal recessive, 7 (2)               |

|      |   |                 |          |          |        |       |   |   |        |        |                                                 |
|------|---|-----------------|----------|----------|--------|-------|---|---|--------|--------|-------------------------------------------------|
| 2122 | 8 | 8p22            | 15719840 | 15749265 | 29426  | 0.20  | Y | L |        |        |                                                 |
| 2123 | 8 | 8p22            | 16177784 | 16318358 | 140575 | 2.52  | Y | L |        |        |                                                 |
| 2124 | 8 | 8p22            | 16349619 | 16407868 | 58250  | 0.06  | Y | L |        |        |                                                 |
| 2125 | 8 | 8p22            | 16501132 | 16615309 | 114178 | 0.20  | Y | L |        |        |                                                 |
| 2126 | 8 | 8p22            | 17486464 | 17498577 | 12114  | 0.53  | Y | L | 604584 | 604584 | Colorectal cancer, 114500 (3)                   |
| 2127 | 8 | 8p22            | 17827148 | 17845176 | 18029  | 2.46  | N | L | 600299 | 600299 | Thyroid carcinoma, papillary, 188550 (3)        |
| 2128 | 8 | 8p21.3          | 20057085 | 20064287 | 7203   | 0.06  | Y | C | 193002 |        |                                                 |
| 2129 | 8 | 8p21.3          | 20137423 | 20154089 | 16667  | 0.06  | Y | L | 606551 | 606551 | Esophageal squamous cell carcinoma, 133239 (3)  |
| 2130 | 8 | 8p21.3          | 20609078 | 20610705 | 1628   | 0.22  | Y | L |        |        |                                                 |
| 2131 | 8 | 8p21.3          | 21242912 | 21396318 | 153407 | 0.14  | Y | L |        |        |                                                 |
| 2132 | 8 | 8p21.2          | 23453060 | 23463756 | 10697  | 0.11  | Y | L | 610387 |        |                                                 |
| 2133 | 8 | 8p21.2          | 23968662 | 24022581 | 53920  | 0.17  | Y | L |        |        |                                                 |
| 2134 | 8 | 8p21.2          | 24443891 | 24455250 | 11360  | 0.14  | N | L |        |        |                                                 |
| 2135 | 8 | 8p21.2          | 24606364 | 24627438 | 21075  | 0.06  | N | L |        |        |                                                 |
| 2136 | 8 | 8p21.2          | 25030427 | 25049622 | 19196  | 5.67  | Y | L |        |        |                                                 |
| 2137 | 8 | 8p12            | 30210752 | 30242778 | 32027  | 0.06  | N | L |        |        |                                                 |
| 2138 | 8 | 8p12            | 30973921 | 31006424 | 32504  | 0.06  | N | L |        |        |                                                 |
| 2139 | 8 | 8p12            | 31505306 | 31535186 | 29881  | 0.06  | N | L |        |        |                                                 |
| 2140 | 8 | 8p12            | 31953192 | 31989478 | 36287  | 0.06  | N | L |        |        |                                                 |
| 2141 | 8 | 8p12            | 32096379 | 32111579 | 15201  | 0.08  | N | L |        |        |                                                 |
| 2142 | 8 | 8p12            | 32549006 | 32563808 | 14803  | 2.24  | N | L | 142445 | 142445 | {?Schizophrenia, susceptibility to}, 603013 (1) |
| 2143 | 8 | 8p12            | 33015478 | 33088072 | 72595  | 0.06  | N | L |        |        |                                                 |
| 2144 | 8 | 8p12            | 33236644 | 33258816 | 22173  | 0.28  | N | L |        |        |                                                 |
| 2145 | 8 | 8p12            | 34104342 | 34122108 | 17767  | 0.06  | N | L |        |        |                                                 |
| 2146 | 8 | 8p12            | 34403675 | 34407114 | 3440   | 0.08  | N | L |        |        |                                                 |
| 2147 | 8 | 8p12            | 34487723 | 34508529 | 20807  | 0.11  | N | L |        |        |                                                 |
| 2148 | 8 | 8p12            | 36497008 | 36529806 | 32799  | 0.67  | N | L |        |        |                                                 |
| 2149 | 8 | 8p12            | 36811988 | 36879558 | 67571  | 0.17  | N | L |        |        |                                                 |
| 2150 | 8 | 8p11.23-8p11.22 | 39090101 | 39842991 | 752891 | 16.24 | Y | C | 601533 |        |                                                 |
| 2151 | 8 | 8p11.21         | 40513382 | 40560110 | 46729  | 0.89  | N | L |        |        |                                                 |
| 2152 | 8 | 8p11.1          | 43540975 | 43905865 | 364891 | 13.86 | Y | L |        |        |                                                 |
| 2153 | 8 | 8q11.1          | 47341926 | 47577263 | 235338 | 0.78  | Y | L |        |        |                                                 |
| 2154 | 8 | 8q11.1          | 47725049 | 47825322 | 100274 | 0.39  | Y | L |        |        |                                                 |
| 2155 | 8 | 8q11.1          | 47835788 | 47854975 | 19188  | 0.06  | Y | L |        |        |                                                 |
| 2156 | 8 | 8q11.21-8q11.22 | 50387904 | 50407497 | 19594  | 0.08  | N | L |        |        |                                                 |
| 2157 | 8 | 8q11.22         | 50594566 | 50701922 | 107357 | 0.36  | Y | G |        |        |                                                 |
| 2158 | 8 | 8q11.22         | 51190682 | 51199275 | 8594   | 0.06  | Y | L | 608714 |        |                                                 |
| 2159 | 8 | 8q11.22         | 51542530 | 51563239 | 20710  | 0.06  | Y | G | 608714 |        |                                                 |
| 2160 | 8 | 8q11.22         | 51810256 | 51849555 | 39300  | 0.39  | N | L | 608714 |        |                                                 |
| 2161 | 8 | 8q11.22         | 52050479 | 52093777 | 43299  | 0.14  | N | L |        |        |                                                 |
| 2162 | 8 | 8q11.22         | 52671073 | 52704582 | 33510  | 0.06  | Y | L |        |        |                                                 |
| 2163 | 8 | 8q11.23         | 53056737 | 53075753 | 19017  | 0.06  | N | L |        |        |                                                 |
| 2164 | 8 | 8q11.23         | 54117190 | 54133777 | 16588  | 0.08  | Y | C |        |        |                                                 |
| 2165 | 8 | 8q11.23         | 54219899 | 54221900 | 2002   | 1.68  | N | L |        |        |                                                 |
| 2166 | 8 | 8q11.23         | 54506653 | 54528605 | 21953  | 0.14  | N | L |        |        |                                                 |
| 2167 | 8 | 8q11.23         | 55529278 | 55534177 | 4900   | 0.06  | Y | G | 610928 |        |                                                 |
| 2168 | 8 | 8q12.1          | 57762359 | 57815582 | 53224  | 0.06  | Y | L |        |        |                                                 |
| 2169 | 8 | 8q12.1          | 58279344 | 58295352 | 16009  | 0.11  | Y | L |        |        |                                                 |
| 2170 | 8 | 8q12.1          | 60360528 | 60401833 | 41306  | 0.14  | Y | L |        |        |                                                 |
| 2171 | 8 | 8q12.1          | 60813156 | 60831373 | 18218  | 0.11  | N | L |        |        |                                                 |
| 2172 | 8 | 8q12.1          | 61109303 | 61162272 | 52970  | 1.06  | Y | L |        |        |                                                 |
| 2173 | 8 | 8q12.3          | 63002053 | 63034891 | 32839  | 0.28  | N | L |        |        |                                                 |
| 2174 | 8 | 8q12.3          | 63155334 | 63184308 | 28975  | 0.50  | N | L |        |        |                                                 |
| 2175 | 8 | 8q12.3          | 63289560 | 63309295 | 19736  | 0.06  | N | L |        |        |                                                 |
| 2176 | 8 | 8q12.3          | 63515054 | 63566429 | 51376  | 0.36  | N | L | 612872 |        |                                                 |
| 2177 | 8 | 8q12.3          | 63574831 | 63731966 | 157136 | 1.31  | N | L | 612872 |        |                                                 |
| 2178 | 8 | 8q12.3          | 63821557 | 63844490 | 22934  | 0.11  | N | L | 612872 |        |                                                 |
| 2179 | 8 | 8q12.3          | 63882398 | 63899895 | 17498  | 0.11  | N | L | 612872 |        |                                                 |
| 2180 | 8 | 8q12.3          | 64690518 | 64721520 | 31003  | 0.22  | N | L |        |        |                                                 |
| 2181 | 8 | 8q12.3          | 64790995 | 64803567 | 12573  | 0.11  | N | L |        |        |                                                 |
| 2182 | 8 | 8q12.3          | 64817168 | 64848387 | 31220  | 0.08  | Y | L |        |        |                                                 |
| 2183 | 8 | 8q12.3          | 64919211 | 64948302 | 29092  | 0.06  | N | L |        |        |                                                 |
| 2184 | 8 | 8q12.3          | 65336932 | 65391007 | 54076  | 3.16  | N | L |        |        |                                                 |
| 2185 | 8 | 8q13.2          | 68847578 | 68858195 | 10618  | 0.14  | Y | L |        |        |                                                 |



|      |   |          |           |           |         |      |   |   |  |  |        |        |  |  |  |                                    |
|------|---|----------|-----------|-----------|---------|------|---|---|--|--|--------|--------|--|--|--|------------------------------------|
| 2186 | 8 | 8q13.2   | 69645379  | 69686682  | 41304   | 0.53 | N | L |  |  |        |        |  |  |  |                                    |
| 2187 | 8 | 8q13.2   | 69892123  | 69906035  | 13913   | 0.06 | N | L |  |  |        |        |  |  |  |                                    |
| 2188 | 8 | 8q13.2   | 70255391  | 70280548  | 25158   | 0.08 | N | L |  |  |        |        |  |  |  |                                    |
| 2189 | 8 | 8q21.11  | 74555744  | 74572707  | 16964   | 0.75 | N | L |  |  |        |        |  |  |  |                                    |
| 2190 | 8 | 8q21.11  | 75576263  | 75606410  | 30148   | 0.14 | N | L |  |  |        |        |  |  |  |                                    |
| 2191 | 8 | 8q21.11  | 76193236  | 76224437  | 31202   | 0.20 | Y | L |  |  |        |        |  |  |  |                                    |
| 2192 | 8 | 8q21.11  | 76328141  | 77541200  | 1213060 | 1.90 | Y | L |  |  | 605966 |        |  |  |  |                                    |
| 2193 | 8 | 8q21.11  | 78208864  | 78231997  | 23134   | 0.06 | N | L |  |  |        |        |  |  |  |                                    |
| 2194 | 8 | 8q21.11  | 78413678  | 78476377  | 62700   | 0.31 | Y | L |  |  |        |        |  |  |  |                                    |
| 2195 | 8 | 8q21.12  | 78570181  | 78643662  | 73482   | 6.65 | N | L |  |  |        |        |  |  |  |                                    |
| 2196 | 8 | 8q21.12  | 78668520  | 78687147  | 18628   | 0.14 | N | L |  |  |        |        |  |  |  |                                    |
| 2197 | 8 | 8q21.12  | 78709192  | 78757744  | 48553   | 0.20 | N | L |  |  |        |        |  |  |  |                                    |
| 2198 | 8 | 8q21.12  | 79207110  | 79291979  | 84870   | 1.70 | N | L |  |  |        |        |  |  |  |                                    |
| 2199 | 8 | 8q21.12  | 79799033  | 80008739  | 209707  | 2.66 | Y | L |  |  | 146660 |        |  |  |  |                                    |
| 2200 | 8 | 8q21.12  | 80159189  | 80206387  | 47199   | 0.67 | N | L |  |  |        |        |  |  |  |                                    |
| 2201 | 8 | 8q21.13  | 80304821  | 80321881  | 17061   | 0.08 | Y | L |  |  |        |        |  |  |  |                                    |
| 2202 | 8 | 8q21.13  | 80396651  | 80408224  | 11574   | 0.08 | Y | L |  |  |        |        |  |  |  |                                    |
| 2203 | 8 | 8q21.13  | 83140358  | 83176408  | 36051   | 0.06 | Y | L |  |  |        |        |  |  |  |                                    |
| 2204 | 8 | 8q21.13  | 83358226  | 83759995  | 401770  | 1.12 | Y | L |  |  |        |        |  |  |  |                                    |
| 2205 | 8 | 8q21.13  | 83778848  | 83793188  | 14341   | 0.08 | N | L |  |  |        |        |  |  |  |                                    |
| 2206 | 8 | 8q21.13  | 84134033  | 84147851  | 13819   | 0.06 | N | L |  |  |        |        |  |  |  |                                    |
| 2207 | 8 | 8q21.13  | 84479512  | 84659342  | 179831  | 0.48 | Y | L |  |  |        |        |  |  |  |                                    |
| 2208 | 8 | 8q21.13- |           |           |         |      |   |   |  |  |        |        |  |  |  |                                    |
|      |   | 8q21.2   | 84783287  | 84904491  | 121205  | 0.28 | N | L |  |  |        |        |  |  |  |                                    |
| 2209 | 8 | 8q21.2   | 85514536  | 85536991  | 22456   | 0.59 | Y | L |  |  |        |        |  |  |  |                                    |
| 2210 | 8 | 8q21.2   | 85747695  | 85828578  | 80884   | 0.11 | Y | L |  |  |        |        |  |  |  |                                    |
| 2211 | 8 | 8q21.2   | 85971613  | 85995409  | 23797   | 0.06 | Y | L |  |  |        |        |  |  |  |                                    |
| 2212 | 8 | 8q21.2   | 86910517  | 86989668  | 79152   | 0.06 | Y | L |  |  |        |        |  |  |  |                                    |
| 2213 | 8 | 8q21.3   | 87281809  | 87308682  | 26874   | 0.08 | Y | L |  |  |        |        |  |  |  |                                    |
| 2214 | 8 | 8q21.3   | 87851629  | 87858448  | 6820    | 0.06 | Y | L |  |  |        |        |  |  |  |                                    |
| 2215 | 8 | 8q21.3   | 87910484  | 87933005  | 22522   | 0.08 | Y | L |  |  |        |        |  |  |  |                                    |
| 2216 | 8 | 8q21.3   | 88715965  | 88786634  | 70670   | 1.96 | Y | L |  |  |        |        |  |  |  |                                    |
| 2217 | 8 | 8q21.3   | 89148139  | 89220641  | 72503   | 1.98 | Y | L |  |  | 602262 |        |  |  |  |                                    |
| 2218 | 8 | 8q21.3   | 89610825  | 89670250  | 59426   | 0.11 | Y | L |  |  |        |        |  |  |  |                                    |
| 2219 | 8 | 8q21.3   | 89994736  | 90124160  | 129425  | 0.92 | Y | L |  |  |        |        |  |  |  |                                    |
| 2220 | 8 | 8q21.3   | 90206705  | 90255559  | 48855   | 0.06 | N | L |  |  |        |        |  |  |  |                                    |
| 2221 | 8 | 8q21.3   | 90421880  | 90463543  | 41664   | 0.08 | N | L |  |  |        |        |  |  |  |                                    |
| 2222 | 8 | 8q21.3   | 90670216  | 90677749  | 7534    | 0.22 | N | L |  |  |        |        |  |  |  |                                    |
| 2223 | 8 | 8q21.3   | 91212227  | 91279648  | 67422   | 0.20 | Y | L |  |  |        |        |  |  |  |                                    |
| 2224 | 8 | 8q21.3   | 91377868  | 91406063  | 28196   | 0.17 | Y | L |  |  |        |        |  |  |  |                                    |
| 2225 | 8 | 8q21.3   | 91543044  | 91565235  | 22192   | 0.34 | N | L |  |  |        |        |  |  |  |                                    |
| 2226 | 8 | 8q21.3   | 91753185  | 91774516  | 21332   | 0.06 | N | L |  |  |        |        |  |  |  |                                    |
| 2227 | 8 | 8q21.3   | 92190034  | 92256189  | 66156   | 6.74 | Y | L |  |  |        |        |  |  |  |                                    |
| 2228 | 8 | 8q21.3   | 93336619  | 93367500  | 30882   | 0.25 | N | L |  |  |        |        |  |  |  |                                    |
| 2229 | 8 | 8q22.1   | 96656641  | 96669266  | 12626   | 0.06 | N | L |  |  |        |        |  |  |  |                                    |
| 2230 | 8 | 8q22.1   | 97002687  | 97021128  | 18442   | 0.06 | N | L |  |  |        |        |  |  |  |                                    |
| 2231 | 8 | 8q22.1   | 98145269  | 98190971  | 45703   | 0.28 | N | L |  |  |        |        |  |  |  |                                    |
| 2232 | 8 | 8q22.2   | 100226992 | 100262759 | 35768   | 0.06 | Y | L |  |  | 607817 | 607817 |  |  |  | Cohen syndrome, 216550 (3)         |
| 2233 | 8 | 8q22.2   | 100418659 | 100705091 | 286433  | 0.06 | Y | L |  |  | 607817 | 607817 |  |  |  | Cohen syndrome, 216550 (3)         |
| 2234 | 8 | 8q22.3   | 102824050 | 102846339 | 22290   | 0.22 | N | L |  |  | 606722 |        |  |  |  |                                    |
| 2235 | 8 | 8q22.3   | 105421174 | 105436961 | 15788   | 0.87 | N | L |  |  | 605933 |        |  |  |  |                                    |
| 2236 | 8 | 8q23.1   | 106386865 | 106424373 | 37509   | 0.28 | N | L |  |  | 603693 | 603693 |  |  |  | Diaphragmatic hernia 3, 610187 (3) |
| 2237 | 8 | 8q23.1   | 106794362 | 106859347 | 64986   | 3.10 | N | L |  |  | 603693 | 603693 |  |  |  | Diaphragmatic hernia 3, 610187 (3) |
| 2238 | 8 | 8q23.1   | 106893957 | 106915843 | 21887   | 0.14 | N | L |  |  |        |        |  |  |  |                                    |
| 2239 | 8 | 8q23.1   | 107223431 | 107271324 | 47894   | 0.11 | N | L |  |  |        |        |  |  |  |                                    |
| 2240 | 8 | 8q23.1   | 107491147 | 107564094 | 72948   | 1.23 | Y | L |  |  |        |        |  |  |  |                                    |
| 2241 | 8 | 8q23.1   | 107999809 | 108018001 | 18193   | 0.11 | N | L |  |  |        |        |  |  |  |                                    |
| 2242 | 8 | 8q23.1   | 108269300 | 108305179 | 35880   | 0.08 | N | L |  |  |        |        |  |  |  |                                    |
| 2243 | 8 | 8q23.1   | 109494368 | 109509440 | 15073   | 0.06 | N | L |  |  |        |        |  |  |  |                                    |
| 2244 | 8 | 8q23.1   | 109618859 | 109633341 | 14483   | 0.08 | N | L |  |  |        |        |  |  |  |                                    |
| 2245 | 8 | 8q23.1   | 109701189 | 109745629 | 44441   | 1.09 | N | L |  |  |        |        |  |  |  |                                    |
| 2246 | 8 | 8q23.1   | 109831480 | 109850116 | 18637   | 0.08 | Y | L |  |  |        |        |  |  |  |                                    |
| 2247 | 8 | 8q23.2   | 110883390 | 110921455 | 38066   | 0.73 | N | L |  |  |        |        |  |  |  |                                    |
| 2248 | 8 | 8q23.2   | 110952034 | 111005521 | 53488   | 1.01 | N | L |  |  |        |        |  |  |  |                                    |
| 2249 | 8 | 8q23.2   | 111206482 | 111256237 | 49756   | 0.45 | N | L |  |  |        |        |  |  |  |                                    |
| 2250 | 8 | 8q23.2   | 111515506 | 111557734 | 42229   | 0.28 | N | L |  |  |        |        |  |  |  |                                    |
| 2251 | 8 | 8q23.2   | 111782181 | 111803965 | 21785   | 0.17 | Y | L |  |  |        |        |  |  |  |                                    |
| 2252 | 8 | 8q23.2   | 111863463 | 111956253 | 92791   | 0.08 | N | L |  |  |        |        |  |  |  |                                    |

|      |   |                |           |           |        |       |   |   |        |        |                                                                          |  |
|------|---|----------------|-----------|-----------|--------|-------|---|---|--------|--------|--------------------------------------------------------------------------|--|
| 2253 | 8 | 8q23.2         | 112042565 | 112157498 | 114934 | 0.14  | Y | L |        |        |                                                                          |  |
| 2254 | 8 | 8q23.3         | 112996756 | 113087217 | 90462  | 0.87  | N | L |        |        |                                                                          |  |
| 2255 | 8 | 8q23.3         | 113441456 | 113449291 | 7836   | 0.14  | N | L | 608399 |        |                                                                          |  |
| 2256 | 8 | 8q23.3         | 113629925 | 113662861 | 32937  | 0.20  | N | L | 608399 |        |                                                                          |  |
| 2257 | 8 | 8q23.3         | 113876876 | 113899234 | 22359  | 0.06  | N | L | 608399 |        |                                                                          |  |
| 2258 | 8 | 8q23.3         | 113962909 | 114005299 | 42391  | 1.62  | N | C | 608399 |        |                                                                          |  |
| 2259 | 8 | 8q23.3         | 114039827 | 114104594 | 64768  | 0.08  | N | L | 608399 |        |                                                                          |  |
| 2260 | 8 | 8q23.3         | 114204874 | 114326128 | 121255 | 1.43  | N | L | 608399 |        |                                                                          |  |
| 2261 | 8 | 8q23.3         | 114634601 | 114682341 | 47741  | 0.08  | Y | L |        |        |                                                                          |  |
| 2262 | 8 | 8q23.3         | 114809491 | 114844757 | 35267  | 0.39  | Y | L |        |        |                                                                          |  |
| 2263 | 8 | 8q23.3         | 114892918 | 114907848 | 14931  | 0.11  | Y | L |        |        |                                                                          |  |
| 2264 | 8 | 8q23.3         | 114970155 | 115007501 | 37347  | 0.14  | Y | L |        |        |                                                                          |  |
| 2265 | 8 | 8q23.3         | 115419576 | 116292967 | 873392 | 3.52  | Y | L |        |        |                                                                          |  |
| 2266 | 8 | 8q23.3         | 116331186 | 116346347 | 15162  | 0.06  | N | L |        |        |                                                                          |  |
| 2267 | 8 | 8q23.3         | 116658393 | 116666873 | 8481   | 0.53  | N | L | 604386 | 604386 | Trichorhinophalangeal syndrome, type I, 190350 (3)                       |  |
| 2268 | 8 | 8q23.3         | 116768343 | 116789579 | 21237  | 0.28  | N | L |        |        |                                                                          |  |
| 2269 | 8 | 8q23.3         | 116876875 | 116888881 | 12007  | 0.34  | N | L |        |        |                                                                          |  |
| 2270 | 8 | 8q23.3         | 117006963 | 117058259 | 51297  | 0.31  | Y | L |        |        |                                                                          |  |
| 2271 | 8 | 8q23.3-8q24.11 | 117699864 | 117702438 | 2575   | 0.39  | Y | L |        |        |                                                                          |  |
| 2272 | 8 | 8q24.11        | 118090852 | 118107783 | 16932  | 0.34  | N | L |        |        |                                                                          |  |
| 2273 | 8 | 8q24.11        | 118192247 | 118221810 | 29564  | 1.62  | N | L | 611145 | 611145 | {Diabetes mellitus, noninsulin-dependent, susceptibility to}, 125853 (3) |  |
| 2274 | 8 | 8q24.11        | 119126601 | 119137854 | 11254  | 0.59  | Y | L | 608177 | 608177 | Chondrosarcoma, 215300 (3)                                               |  |
| 2275 | 8 | 8q24.12        | 119281773 | 119284165 | 2393   | 0.06  | Y | L |        |        |                                                                          |  |
| 2276 | 8 | 8q24.12        | 119305578 | 119357410 | 51833  | 1.93  | Y | L |        |        |                                                                          |  |
| 2277 | 8 | 8q24.12        | 120131135 | 120151783 | 20649  | 0.06  | Y | L | 607620 |        |                                                                          |  |
| 2278 | 8 | 8q24.12        | 120225179 | 120233623 | 8445   | 0.06  | Y | L |        |        |                                                                          |  |
| 2279 | 8 | 8q24.12        | 120425369 | 120434794 | 9426   | 0.14  | N | L |        |        |                                                                          |  |
| 2280 | 8 | 8q24.12        | 121174180 | 121188149 | 13970  | 0.06  | N | L |        |        |                                                                          |  |
| 2281 | 8 | 8q24.12        | 121545086 | 121567545 | 22460  | 0.06  | N | L | 605927 |        |                                                                          |  |
| 2282 | 8 | 8q24.12        | 122054217 | 122067122 | 12906  | 0.22  | N | L |        |        |                                                                          |  |
| 2283 | 8 | 8q24.12        | 122143589 | 122183054 | 39466  | 0.22  | N | L |        |        |                                                                          |  |
| 2284 | 8 | 8q24.12        | 122335651 | 122346050 | 10400  | 0.50  | N | L |        |        |                                                                          |  |
| 2285 | 8 | 8q24.13        | 122760879 | 122771991 | 11113  | 0.06  | N | G |        |        |                                                                          |  |
| 2286 | 8 | 8q24.13        | 123453680 | 123498651 | 44972  | 0.34  | N | L |        |        |                                                                          |  |
| 2287 | 8 | 8q24.13        | 127028456 | 127054152 | 25697  | 0.08  | N | L |        |        |                                                                          |  |
| 2288 | 8 | 8q24.13        | 127187643 | 127222338 | 34696  | 0.06  | N | L |        |        |                                                                          |  |
| 2289 | 8 | 8q24.21        | 128048873 | 128053732 | 4860   | 0.06  | N | L |        |        |                                                                          |  |
| 2290 | 8 | 8q24.21        | 128116770 | 128144376 | 27607  | 1.06  | N | L |        |        |                                                                          |  |
| 2291 | 8 | 8q24.21        | 129019540 | 129040083 | 20544  | 0.28  | N | L | 165140 |        |                                                                          |  |
| 2292 | 8 | 8q24.21        | 129555341 | 129601852 | 46512  | 0.08  | N | L |        |        |                                                                          |  |
| 2293 | 8 | 8q24.21        | 129810718 | 129832409 | 21692  | 0.06  | Y | L |        |        |                                                                          |  |
| 2294 | 8 | 8q24.21        | 130181350 | 130197300 | 15951  | 0.17  | N | L |        |        |                                                                          |  |
| 2295 | 8 | 8q24.21        | 130580250 | 130597259 | 17010  | 0.06  | N | L |        |        |                                                                          |  |
| 2296 | 8 | 8q24.21        | 130847309 | 130849642 | 2334   | 0.06  | Y | L | 608384 |        |                                                                          |  |
| 2297 | 8 | 8q24.22        | 132423461 | 132448566 | 25106  | 0.06  | N | C |        |        |                                                                          |  |
| 2298 | 8 | 8q24.22        | 132758919 | 132809704 | 50786  | 3.72  | N | L |        |        |                                                                          |  |
| 2299 | 8 | 8q24.22        | 133875071 | 133914560 | 39490  | 0.17  | N | L |        |        |                                                                          |  |
| 2300 | 8 | 8q24.22        | 135096077 | 135113492 | 17416  | 0.06  | N | L |        |        |                                                                          |  |
| 2301 | 8 | 8q24.22        | 135121970 | 135144459 | 22490  | 1.48  | Y | L |        |        |                                                                          |  |
| 2302 | 8 | 8q24.22        | 135400743 | 135492091 | 91349  | 0.28  | N | L |        |        |                                                                          |  |
| 2303 | 8 | 8q24.22        | 136442875 | 136457838 | 14964  | 0.06  | N | L |        |        |                                                                          |  |
| 2304 | 8 | 8q24.23        | 137215531 | 137233415 | 17885  | 0.78  | Y | L |        |        |                                                                          |  |
| 2305 | 8 | 8q24.23        | 137463288 | 137479637 | 16350  | 0.28  | N | L |        |        |                                                                          |  |
| 2306 | 8 | 8q24.23        | 138017796 | 138042407 | 24612  | 0.14  | Y | L |        |        |                                                                          |  |
| 2307 | 8 | 8q24.23        | 138533337 | 138574408 | 41072  | 0.59  | N | L |        |        |                                                                          |  |
| 2308 | 8 | 8q24.3         | 140161906 | 140222558 | 60653  | 0.31  | Y | L |        |        |                                                                          |  |
| 2309 | 8 | 8q24.3         | 140652984 | 140654708 | 1725   | 0.08  | N | L |        |        |                                                                          |  |
| 2310 | 8 | 8q24.3         | 144362297 | 144382077 | 19781  | 0.70  | Y | C | 612757 |        |                                                                          |  |
| 2311 | 8 | 8q24.3         | 144764358 | 144788152 | 23795  | 19.06 | Y | C | 137020 |        |                                                                          |  |
| 2312 | 8 | 8q24.3         | 146120280 | 146180179 | 59900  | 0.06  | Y | L | 601262 |        |                                                                          |  |
| 2313 | 9 | 9p24.3         | 1734771   | 1747468   | 12698  | 0.31  | Y | L |        |        |                                                                          |  |
| 2314 | 9 | 9p24.2         | 2439301   | 2462254   | 22954  | 0.20  | N | L |        |        |                                                                          |  |
| 2315 | 9 | 9p24.2         | 3103480   | 3122236   | 18757  | 0.39  | N | L |        |        |                                                                          |  |
| 2316 | 9 | 9p24.2         | 4025710   | 4036569   | 10860  | 0.39  | Y | L | 610192 | 610192 | Diabetes mellitus, neonatal, with congenital                             |  |

hypothyroidism,  
610199 (3)

|      |   |        |          |          |        |       |   |   |        |
|------|---|--------|----------|----------|--------|-------|---|---|--------|
| 2317 | 9 | 9p24.2 | 4390070  | 4434412  | 44343  | 0.06  | Y | L |        |
| 2318 | 9 | 9p24.1 | 4924982  | 4937510  | 12529  | 0.06  | N | L |        |
| 2319 | 9 | 9p24.1 | 5311969  | 5327714  | 15746  | 0.11  | Y | L | 179730 |
| 2320 | 9 | 9p24.1 | 5331043  | 5368216  | 37174  | 0.25  | Y | L |        |
| 2321 | 9 | 9p24.1 | 5737228  | 6124787  | 387560 | 0.14  | N | L | 610354 |
| 2322 | 9 | 9p24.1 | 6647109  | 6659352  | 12244  | 0.11  | Y | C |        |
| 2323 | 9 | 9p24.1 | 6905049  | 6930375  | 25327  | 0.28  | N | L | 605469 |
| 2324 | 9 | 9p24.1 | 6951871  | 6963510  | 11640  | 0.22  | N | L | 605469 |
| 2325 | 9 | 9p24.1 | 6992389  | 7035058  | 42670  | 0.31  | N | L | 605469 |
| 2326 | 9 | 9p24.1 | 7442476  | 7456166  | 13691  | 0.25  | Y | L |        |
| 2327 | 9 | 9p24.1 | 7717088  | 7754447  | 37360  | 0.45  | Y | L |        |
| 2328 | 9 | 9p24.1 | 7811244  | 7842300  | 31057  | 0.81  | N | L |        |
| 2329 | 9 | 9p24.1 | 8002418  | 8138244  | 135827 | 0.78  | Y | L |        |
| 2330 | 9 | 9p24.1 | 8270666  | 8289021  | 18356  | 0.06  | Y | L |        |
| 2331 | 9 | 9p24.1 | 8942346  | 8998559  | 56214  | 0.67  | Y | L | 601598 |
| 2332 | 9 | 9p23   | 9117537  | 9507393  | 389857 | 6.60  | Y | L | 601598 |
| 2333 | 9 | 9p23   | 9569104  | 9583722  | 14619  | 0.34  | Y | L | 601598 |
| 2334 | 9 | 9p23   | 9821068  | 9856177  | 35110  | 0.11  | Y | L | 601598 |
| 2335 | 9 | 9p23   | 9866564  | 9938303  | 71740  | 0.11  | Y | L | 601598 |
| 2336 | 9 | 9p23   | 9939431  | 10015975 | 76545  | 0.11  | Y | L | 601598 |
| 2337 | 9 | 9p23   | 10041794 | 10099266 | 57473  | 1.48  | N | L | 601598 |
| 2338 | 9 | 9p23   | 10114920 | 10204007 | 89088  | 0.14  | Y | L | 601598 |
| 2339 | 9 | 9p23   | 10214096 | 10239815 | 25720  | 0.36  | Y | L | 601598 |
| 2340 | 9 | 9p23   | 10252484 | 10280234 | 27751  | 0.06  | Y | L | 601598 |
| 2341 | 9 | 9p23   | 10296683 | 10322258 | 25576  | 0.31  | Y | L | 601598 |
| 2342 | 9 | 9p23   | 10361401 | 10434206 | 72806  | 13.75 | Y | C | 601598 |
| 2343 | 9 | 9p23   | 10492367 | 10535420 | 43054  | 0.20  | Y | C | 601598 |
| 2344 | 9 | 9p23   | 10830628 | 10853324 | 22697  | 0.08  | N | L |        |
| 2345 | 9 | 9p23   | 10908392 | 10927874 | 19483  | 0.06  | N | L |        |
| 2346 | 9 | 9p23   | 11207887 | 11286757 | 78871  | 1.29  | Y | C |        |
| 2347 | 9 | 9p23   | 11408394 | 11418042 | 9649   | 0.08  | Y | L |        |
| 2348 | 9 | 9p23   | 11464608 | 11517480 | 52873  | 0.06  | Y | L |        |
| 2349 | 9 | 9p23   | 11635592 | 11654000 | 18409  | 0.11  | Y | L |        |
| 2350 | 9 | 9p23   | 11709129 | 12198927 | 489799 | 6.09  | Y | C |        |
| 2351 | 9 | 9p23   | 12330230 | 12369477 | 39248  | 0.11  | Y | L |        |
| 2352 | 9 | 9p23   | 12511257 | 12512807 | 1551   | 0.06  | Y | L |        |
| 2353 | 9 | 9p23   | 13125698 | 13215508 | 89811  | 0.22  | N | L | 603785 |
| 2354 | 9 | 9p23   | 13746710 | 13774091 | 27382  | 0.14  | N | L |        |
| 2355 | 9 | 9p23   | 13794421 | 13807376 | 12956  | 0.06  | N | L |        |
| 2356 | 9 | 9p22.3 | 14634737 | 14642953 | 8217   | 0.08  | Y | L |        |
| 2357 | 9 | 9p22.3 | 15899692 | 15945666 | 45975  | 0.06  | N | L |        |
| 2358 | 9 | 9p22.2 | 17626245 | 17626674 | 430    | 0.61  | Y | L | 604465 |
| 2359 | 9 | 9p22.2 | 17697677 | 17726342 | 28666  | 1.06  | Y | C | 604465 |
| 2360 | 9 | 9p22.2 | 17978203 | 18012602 | 34400  | 0.89  | Y | L |        |
| 2361 | 9 | 9p22.2 | 18109147 | 18162393 | 53247  | 0.48  | Y | L |        |
| 2362 | 9 | 9p22.1 | 18614888 | 18626286 | 11399  | 0.06  | Y | L | 609198 |
| 2363 | 9 | 9p22.1 | 18906825 | 18942310 | 35486  | 0.06  | Y | L |        |
| 2364 | 9 | 9p21.3 | 19955455 | 19991595 | 36141  | 0.22  | Y | L |        |
| 2365 | 9 | 9p21.3 | 20304007 | 20313846 | 9840   | 0.22  | Y | L |        |
| 2366 | 9 | 9p21.3 | 20791991 | 20850416 | 58426  | 0.11  | Y | L |        |
| 2367 | 9 | 9p21.3 | 20872525 | 20902966 | 30442  | 0.14  | N | L |        |
| 2368 | 9 | 9p21.3 | 21181029 | 21189142 | 8114   | 6.48  | Y | C |        |
| 2369 | 9 | 9p21.3 | 21216228 | 21225442 | 9215   | 0.06  | N | L | 147583 |
| 2370 | 9 | 9p21.3 | 21737672 | 21775018 | 37347  | 0.42  | N | L |        |
| 2371 | 9 | 9p21.3 | 22629567 | 22723238 | 93672  | 1.70  | Y | L |        |
| 2372 | 9 | 9p21.3 | 22889764 | 22913249 | 23486  | 0.92  | N | L |        |
| 2373 | 9 | 9p21.3 | 23178081 | 23201016 | 22936  | 0.11  | N | L |        |
| 2374 | 9 | 9p21.3 | 23351805 | 23377117 | 25313  | 31.44 | Y | C |        |
| 2375 | 9 | 9p21.3 | 23573321 | 23624681 | 51361  | 0.50  | N | L |        |
| 2376 | 9 | 9p21.3 | 24017301 | 24089188 | 71888  | 2.68  | N | L |        |
| 2377 | 9 | 9p21.3 | 24102974 | 24236608 | 133635 | 0.20  | Y | L |        |
| 2378 | 9 | 9p21.3 | 24504898 | 24518103 | 13206  | 0.08  | Y | L |        |
| 2379 | 9 | 9p21.3 | 24599893 | 24624834 | 24942  | 0.11  | N | L |        |
| 2380 | 9 | 9p21.3 | 24762803 | 24814734 | 51932  | 1.03  | N | L |        |
| 2381 | 9 | 9p21.3 | 24825444 | 24840287 | 14844  | 0.06  | N | L |        |
| 2382 | 9 | 9p21.3 | 25025960 | 25099811 | 73852  | 0.70  | N | L |        |
| 2383 | 9 | 9p21.3 | 25291815 | 25337412 | 45598  | 0.17  | Y | L |        |
| 2384 | 9 | 9p21.3 | 25380689 | 25419510 | 38822  | 0.14  | Y | C |        |
| 2385 | 9 | 9p21.2 | 25740497 | 25771922 | 31426  | 0.06  | N | L |        |
| 2386 | 9 | 9p21.2 | 25997600 | 26058230 | 60631  | 3.66  | N | L |        |
| 2387 | 9 | 9p21.2 | 26425047 | 26450924 | 25878  | 0.34  | Y | L |        |
| 2388 | 9 | 9p21.2 | 26703335 | 26776735 | 73401  | 0.20  | Y | L |        |

|      |   |             |           |           |         |       |   |   |        |        |                                  |
|------|---|-------------|-----------|-----------|---------|-------|---|---|--------|--------|----------------------------------|
| 2389 | 9 | 9p21.2      | 27790081  | 27809540  | 19460   | 0.06  | N | L |        |        |                                  |
| 2390 | 9 | 9p21.2      | 27959440  | 27982871  | 23432   | 0.50  | N | L | 609793 |        |                                  |
| 2391 | 9 | 9p21.1      | 28246105  | 28257078  | 10974   | 0.08  | Y | L | 609793 |        |                                  |
| 2392 | 9 | 9p21.1      | 28491039  | 28845630  | 354592  | 0.67  | Y | L | 609793 |        |                                  |
| 2393 | 9 | 9p21.1      | 28853202  | 28875610  | 22409   | 0.06  | N | L |        |        |                                  |
| 2394 | 9 | 9p21.1      | 29390712  | 29425202  | 34491   | 2.46  | Y | L |        |        |                                  |
| 2395 | 9 | 9p21.1      | 29562456  | 29585826  | 23371   | 0.06  | Y | L |        |        |                                  |
| 2396 | 9 | 9p21.1      | 29743472  | 29803230  | 59759   | 0.39  | Y | L |        |        |                                  |
| 2397 | 9 | 9p21.1      | 29885024  | 29920998  | 35975   | 1.76  | Y | L |        |        |                                  |
| 2398 | 9 | 9p21.1      | 29934570  | 29947959  | 13390   | 0.06  | Y | C |        |        |                                  |
| 2399 | 9 | 9p21.1      | 29962177  | 29971474  | 9298    | 1.06  | Y | L |        |        |                                  |
| 2400 | 9 | 9p21.1      | 30105718  | 30148373  | 42656   | 0.08  | Y | L |        |        |                                  |
| 2401 | 9 | 9p21.1      | 30307124  | 30333405  | 26282   | 0.45  | Y | L |        |        |                                  |
| 2402 | 9 | 9p21.1      | 30352055  | 30435000  | 82946   | 0.06  | Y | L |        |        |                                  |
| 2403 | 9 | 9p21.1      | 30499036  | 30740444  | 241409  | 0.67  | Y | L |        |        |                                  |
| 2404 | 9 | 9p21.1      | 30887673  | 30925939  | 38267   | 1.15  | Y | L |        |        |                                  |
| 2405 | 9 | 9p21.1      | 30942534  | 30966510  | 23977   | 0.11  | Y | L |        |        |                                  |
| 2406 | 9 | 9p21.1      | 31053444  | 31198933  | 145490  | 3.05  | Y | C |        |        |                                  |
| 2407 | 9 | 9p21.1      | 31501018  | 31522075  | 21058   | 0.06  | N | L |        |        |                                  |
| 2408 | 9 | 9p21.1      | 31594727  | 31609571  | 14845   | 0.06  | N | L |        |        |                                  |
| 2409 | 9 | 9p21.1      | 31668559  | 31703980  | 35422   | 0.34  | N | L |        |        |                                  |
| 2410 | 9 | 9p21.1      | 31747648  | 31779618  | 31971   | 0.08  | N | L |        |        |                                  |
| 2411 | 9 | 9p21.1      | 31824128  | 31863011  | 38884   | 0.75  | Y | C |        |        |                                  |
| 2412 | 9 | 9p21.1      | 31902020  | 31963636  | 61617   | 0.20  | N | C |        |        |                                  |
| 2413 | 9 | 9p21.1      | 32085083  | 32104161  | 19079   | 0.08  | Y | L |        |        |                                  |
| 2414 | 9 | 9p13.1      | 38986103  | 39128121  | 142019  | 0.08  | Y | L | 610517 |        |                                  |
| 2415 | 9 | 9p12        | 40582906  | 41975187  | 1392282 | 0.48  | Y | L |        |        |                                  |
| 2416 | 9 | 9p12-9p11.2 | 42090431  | 44793638  | 2703208 | 12.44 | Y | C | 611085 |        |                                  |
| 2417 | 9 | 9p11.2      | 45028875  | 45621982  | 593108  | 1.26  | Y | C |        |        |                                  |
| 2418 | 9 | 9q12-9q13   | 68284022  | 70087131  | 1803110 | 0.67  | Y | L | 611085 |        |                                  |
| 2419 | 9 | 9q21.11     | 70930348  | 70937080  | 6733    | 0.73  | Y | L |        |        |                                  |
| 2420 | 9 | 9q21.11     | 71287967  | 71306626  | 18660   | 0.39  | Y | L | 602414 |        |                                  |
| 2421 | 9 | 9q21.11     | 72551154  | 72583473  | 32320   | 0.39  | N | L | 608961 |        |                                  |
| 2422 | 9 | 9q21.12     | 72886514  | 73061607  | 175094  | 0.08  | N | L | 608961 |        |                                  |
| 2423 | 9 | 9q21.13     | 75142079  | 75235648  | 93570   | 1.87  | Y | L |        |        |                                  |
| 2424 | 9 | 9q21.13     | 75302903  | 75346154  | 43252   | 0.14  | N | L |        |        |                                  |
| 2425 | 9 | 9q21.13     | 75497349  | 75610954  | 113606  | 1.82  | N | L |        |        |                                  |
| 2426 | 9 | 9q21.13     | 76118497  | 76135768  | 17272   | 0.20  | N | L |        |        |                                  |
| 2427 | 9 | 9q21.13     | 76212433  | 76227338  | 14906   | 0.11  | N | L |        |        |                                  |
| 2428 | 9 | 9q21.13     | 77300966  | 77307883  | 6918    | 0.08  | N | L |        |        |                                  |
| 2429 | 9 | 9q21.13     | 77379570  | 77420617  | 41048   | 0.59  | N | L |        |        |                                  |
| 2430 | 9 | 9q21.13     | 77464593  | 77500795  | 36203   | 0.28  | N | L |        |        |                                  |
| 2431 | 9 | 9q21.13     | 77526142  | 77530250  | 4109    | 0.08  | N | L |        |        |                                  |
| 2432 | 9 | 9q21.31     | 80462397  | 80480363  | 17967   | 0.11  | N | L |        |        |                                  |
| 2433 | 9 | 9q21.31     | 81168528  | 81176023  | 7496    | 0.11  | N | L |        |        |                                  |
| 2434 | 9 | 9q21.31     | 81728918  | 81757027  | 28110   | 0.36  | N | L |        |        |                                  |
| 2435 | 9 | 9q21.31     | 82346597  | 82469435  | 122839  | 1.20  | N | L |        |        |                                  |
| 2436 | 9 | 9q21.31     | 82742620  | 82777013  | 34394   | 0.06  | Y | L |        |        |                                  |
| 2437 | 9 | 9q21.32     | 83785689  | 83797082  | 11394   | 0.06  | Y | G |        |        |                                  |
| 2438 | 9 | 9q21.32     | 84307525  | 84356889  | 49365   | 0.14  | N | L |        |        |                                  |
| 2439 | 9 | 9q21.32     | 84599910  | 84637239  | 37330   | 0.22  | N | L |        |        |                                  |
| 2440 | 9 | 9q21.32     | 84851719  | 84873027  | 21309   | 0.08  | Y | L | 611344 |        |                                  |
| 2441 | 9 | 9q21.33     | 86368416  | 86384529  | 16114   | 0.28  | N | L |        |        |                                  |
| 2442 | 9 | 9q21.33     | 87105129  | 87113711  | 8583    | 0.14  | N | L |        |        |                                  |
| 2443 | 9 | 9q22.1      | 89907165  | 89946250  | 39086   | 0.31  | Y | L |        |        |                                  |
| 2444 | 9 | 9q22.2      | 92427384  | 92441915  | 14532   | 0.53  | N | L | 607863 |        |                                  |
| 2445 | 9 | 9q22.2      | 92792343  | 92794650  | 2308    | 0.06  | N | G |        |        |                                  |
| 2446 | 9 | 9q22.31     | 93230789  | 93268811  | 38023   | 0.06  | N | L |        |        |                                  |
| 2447 | 9 | 9q22.32     | 95902477  | 95934004  | 31528   | 0.06  | Y | L |        |        |                                  |
| 2448 | 9 | 9q31.1      | 102498995 | 102777603 | 278609  | 0.20  | Y | C |        |        |                                  |
| 2449 | 9 | 9q31.1      | 103029296 | 103051017 | 21722   | 1.17  | N | L |        |        |                                  |
| 2450 | 9 | 9q31.1      | 103213576 | 103226862 | 13287   | 1.45  | N | L | 612724 | 612724 | Fructose intolerance, 229600 (3) |
| 2451 | 9 | 9q31.1      | 103234513 | 103260869 | 26357   | 0.06  | Y | L | 612724 | 612724 | Fructose intolerance, 229600 (3) |
| 2452 | 9 | 9q31.1      | 103446756 | 103477281 | 30526   | 0.89  | N | L | 606650 |        |                                  |
| 2453 | 9 | 9q31.1      | 103756314 | 103922712 | 166399  | 1.03  | Y | L |        |        |                                  |
| 2454 | 9 | 9q31.1      | 104169701 | 104200348 | 30648   | 0.08  | N | L |        |        |                                  |
| 2455 | 9 | 9q31.1      | 104329019 | 104361506 | 32488   | 0.59  | N | L |        |        |                                  |
| 2456 | 9 | 9q31.1      | 104523625 | 104531352 | 7728    | 0.17  | N | L |        |        |                                  |
| 2457 | 9 | 9q31.1      | 104547141 | 104557644 | 10504   | 0.39  | N | L |        |        |                                  |

|      |    |               |           |           |        |      |   |   |        |        |                                                             |
|------|----|---------------|-----------|-----------|--------|------|---|---|--------|--------|-------------------------------------------------------------|
| 2458 | 9  | 9q31.1        | 104577718 | 104821534 | 243817 | 2.85 | Y | C | 604035 |        |                                                             |
| 2459 | 9  | 9q31.1        | 105212719 | 105257598 | 44880  | 0.06 | N | L |        |        |                                                             |
| 2460 | 9  | 9q31.1        | 105351528 | 105376419 | 24892  | 1.15 | N | L |        |        |                                                             |
| 2461 | 9  | 9q31.1        | 105387865 | 105434723 | 46859  | 0.06 | N | L |        |        |                                                             |
| 2462 | 9  | 9q31.1        | 105486317 | 105533346 | 47030  | 0.53 | N | L |        |        |                                                             |
| 2463 | 9  | 9q31.1        | 105704725 | 105799388 | 94664  | 4.89 | N | C |        |        |                                                             |
| 2464 | 9  | 9q31.1        | 106401531 | 106406358 | 4828   | 0.22 | Y | L |        |        |                                                             |
| 2465 | 9  | 9q31.1        | 106411551 | 106414171 | 2621   | 0.14 | Y | L |        |        |                                                             |
| 2466 | 9  | 9q31.1        | 106672017 | 106680632 | 8616   | 0.17 | Y | C | 600046 | 600046 | HDL deficiency, type 2, 604091 (3)                          |
| 2467 | 9  | 9q31.2        | 107534152 | 107559849 | 25698  | 0.14 | N | L | 611236 |        |                                                             |
| 2468 | 9  | 9q31.2        | 107654986 | 107667036 | 12051  | 0.64 | N | L |        |        |                                                             |
| 2469 | 9  | 9q31.2        | 107765388 | 107963278 | 197891 | 0.36 | N | L |        |        |                                                             |
| 2470 | 9  | 9q31.2        | 108096102 | 108146650 | 50549  | 0.48 | N | L |        |        |                                                             |
| 2471 | 9  | 9q31.2        | 108798922 | 108824820 | 25899  | 0.17 | N | L |        |        |                                                             |
| 2472 | 9  | 9q31.2        | 109183520 | 109187323 | 3804   | 0.11 | N | L |        |        |                                                             |
| 2473 | 9  | 9q31.3        | 110445049 | 110467686 | 22638  | 0.11 | N | L |        |        |                                                             |
| 2474 | 9  | 9q31.3        | 111092056 | 111098225 | 6170   | 0.06 | N | L | 610340 |        |                                                             |
| 2475 | 9  | 9q31.3        | 111545842 | 111558715 | 12874  | 0.11 | N | L |        |        |                                                             |
| 2476 | 9  | 9q31.3        | 112666342 | 112703132 | 36791  | 0.17 | N | L | 602282 |        |                                                             |
| 2477 | 9  | 9q32          | 114004153 | 114053952 | 49800  | 0.06 | N | L | 607527 |        |                                                             |
| 2478 | 9  | 9q32          | 116122603 | 116134695 | 12093  | 0.45 | Y | C | 138600 |        |                                                             |
| 2479 | 9  | 9q33.1        | 116967694 | 117036446 | 68753  | 0.36 | N | L | 604767 | 604767 | Esophageal squamous cell carcinoma, 133239 (1)              |
| 2480 | 9  | 9q33.1        | 117207260 | 117225903 | 18644  | 0.06 | N | L |        |        |                                                             |
| 2481 | 9  | 9q33.1        | 117319731 | 117351481 | 31751  | 0.11 | N | L |        |        |                                                             |
| 2482 | 9  | 9q33.1        | 117353746 | 117354199 | 454    | 0.06 | N | L |        |        |                                                             |
| 2483 | 9  | 9q33.1        | 117437734 | 117493135 | 55402  | 0.78 | N | L |        |        |                                                             |
| 2484 | 9  | 9q33.1        | 117536730 | 117579035 | 42306  | 0.61 | N | L |        |        |                                                             |
| 2485 | 9  | 9q33.1        | 117694252 | 117723553 | 29302  | 0.20 | N | L |        |        |                                                             |
| 2486 | 9  | 9q33.1        | 118404399 | 118450577 | 46179  | 0.06 | N | L | 612856 |        |                                                             |
| 2487 | 9  | 9q33.1        | 118801556 | 118840629 | 39074  | 0.89 | N | L | 612856 |        |                                                             |
| 2488 | 9  | 9q33.1        | 119108341 | 119192376 | 84036  | 0.42 | Y | L | 612856 |        |                                                             |
| 2489 | 9  | 9q33.1        | 119237731 | 119259634 | 21904  | 0.08 | N | L |        |        |                                                             |
| 2490 | 9  | 9q33.1        | 119570843 | 119619643 | 48801  | 1.03 | N | L |        |        |                                                             |
| 2491 | 9  | 9q33.1        | 119826846 | 119873450 | 46605  | 1.12 | Y | L |        |        |                                                             |
| 2492 | 9  | 9q33.1        | 119970121 | 120143293 | 173173 | 4.44 | N | L |        |        |                                                             |
| 2493 | 9  | 9q33.1        | 120351416 | 120452035 | 100620 | 1.51 | Y | L |        |        |                                                             |
| 2494 | 9  | 9q33.1        | 121205896 | 121341845 | 135950 | 0.45 | Y | L |        |        |                                                             |
| 2495 | 9  | 9q33.1        | 121701586 | 121742006 | 40421  | 0.06 | N | L |        |        |                                                             |
| 2496 | 9  | 9q33.2        | 125761347 | 125764150 | 2804   | 0.08 | N | L |        |        |                                                             |
| 2497 | 9  | 9q33.2-9q33.3 | 125795869 | 125807643 | 11775  | 0.20 | N | C |        |        |                                                             |
| 2498 | 9  | 9q33.3        | 128203716 | 128205955 | 2240   | 0.08 | N | L |        |        |                                                             |
| 2499 | 9  | 9q34.13       | 133250732 | 133262244 | 11513  | 0.06 | Y | L |        |        |                                                             |
| 2500 | 9  | 9q34.13       | 133306842 | 133315426 | 8585   | 0.06 | Y | L |        |        |                                                             |
| 2501 | 9  | 9q34.13       | 133395360 | 133434635 | 39276  | 0.08 | Y | C | 609328 |        |                                                             |
| 2502 | 9  | 9q34.2        | 134931314 | 134946501 | 15188  | 0.50 | Y | C | 114840 | 114840 | Maturity-onset diabetes of the young, type VIII, 609812 (3) |
| 2503 | 9  | 9q34.2        | 135066874 | 135085934 | 19061  | 0.08 | Y | L | 604606 |        |                                                             |
| 2504 | 9  | 9q34.3        | 137335216 | 137357618 | 22403  | 8.75 | Y | L |        |        |                                                             |
| 2505 | 9  | 9q34.3        | 139331340 | 139347455 | 16116  | 0.31 | Y | C |        |        |                                                             |
| 2506 | 10 | 10p15.3       | 1866813   | 1888756   | 21944  | 0.06 | Y | L |        |        |                                                             |
| 2507 | 10 | 10p15.3       | 2487637   | 2497522   | 9886   | 0.17 | N | L |        |        |                                                             |
| 2508 | 10 | 10p15.3       | 2753366   | 2762078   | 8713   | 1.37 | Y | L |        |        |                                                             |
| 2509 | 10 | 10p15.1       | 4274196   | 4290734   | 16539  | 0.08 | Y | G |        |        |                                                             |
| 2510 | 10 | 10p15.1       | 4927118   | 5003516   | 76399  | 0.25 | N | L |        |        |                                                             |
| 2511 | 10 | 10p14         | 6717526   | 6878948   | 161423 | 0.11 | Y | C |        |        |                                                             |
| 2512 | 10 | 10p14         | 8497835   | 8519692   | 21858  | 0.06 | N | L |        |        |                                                             |
| 2513 | 10 | 10p14         | 8616167   | 8729189   | 113023 | 1.03 | N | L |        |        |                                                             |
| 2514 | 10 | 10p14         | 8836854   | 8852835   | 15982  | 0.28 | N | L |        |        |                                                             |
| 2515 | 10 | 10p14         | 8864601   | 8896302   | 31702  | 0.14 | Y | L |        |        |                                                             |
| 2516 | 10 | 10p14         | 9437826   | 9446582   | 8757   | 0.06 | Y | G |        |        |                                                             |
| 2517 | 10 | 10p14         | 9565183   | 9590586   | 25404  | 0.25 | Y | L |        |        |                                                             |
| 2518 | 10 | 10p14         | 10308271  | 10314293  | 6023   | 0.06 | Y | C |        |        |                                                             |
| 2519 | 10 | 10p13         | 12584244  | 12594304  | 10061  | 0.06 | N | L | 607957 |        |                                                             |
| 2520 | 10 | 10p13         | 13145057  | 13170540  | 25484  | 0.11 | N | G |        |        |                                                             |
| 2521 | 10 | 10p13         | 14817591  | 14835794  | 18204  | 0.06 | Y | L |        |        |                                                             |
| 2522 | 10 | 10p13         | 15861784  | 15882323  | 20540  | 0.25 | Y | L | 611649 |        |                                                             |
| 2523 | 10 | 10p13         | 16528459  | 16559583  | 31125  | 0.06 | N | L | 604446 |        |                                                             |

|      |    |                       |          |          |        |      |   |   |        |        |                                         |
|------|----|-----------------------|----------|----------|--------|------|---|---|--------|--------|-----------------------------------------|
| 2524 | 10 | 10p12.33              | 18293357 | 18332627 | 39271  | 0.25 | N | L | 608734 |        |                                         |
| 2525 | 10 | 10p12.33              | 18543198 | 18551289 | 8092   | 0.06 | N | L | 611876 |        |                                         |
| 2526 | 10 | 10p12.33              | 19142862 | 19170444 | 27583  | 0.20 | N | L |        |        |                                         |
| 2527 | 10 | 10p12.33              | 19390457 | 19426596 | 36140  | 0.48 | N | L |        |        |                                         |
| 2528 | 10 | 10p12.33              | 19623995 | 19648338 | 24344  | 0.70 | Y | L |        |        |                                         |
| 2529 | 10 | 10p12.33              | 19657392 | 19685245 | 27854  | 0.11 | Y | L |        |        |                                         |
| 2530 | 10 | 10p12.32              | 19927326 | 19965107 | 37782  | 0.78 | Y | L |        |        |                                         |
| 2531 | 10 | 10p12.32-<br>10p12.31 | 20488108 | 20534771 | 46664  | 0.98 | Y | L | 606827 |        |                                         |
| 2532 | 10 | 10p12.31              | 20747068 | 20787524 | 40457  | 0.06 | Y | L |        |        |                                         |
| 2533 | 10 | 10p12.31              | 20813815 | 20867111 | 53297  | 0.36 | Y | L |        |        |                                         |
| 2534 | 10 | 10p12.31              | 20876432 | 20902433 | 26002  | 0.08 | Y | L |        |        |                                         |
| 2535 | 10 | 10p12.31              | 20966402 | 21070312 | 103911 | 0.22 | N | L |        |        |                                         |
| 2536 | 10 | 10p12.1               | 24192027 | 24248947 | 56921  | 3.35 | Y | C |        |        |                                         |
| 2537 | 10 | 10p12.1               | 25665327 | 25706511 | 41185  | 0.59 | N | L |        |        |                                         |
| 2538 | 10 | 10p12.1               | 25739199 | 25755874 | 16676  | 0.06 | N | L |        |        |                                         |
| 2539 | 10 | 10p12.1               | 26133887 | 26187066 | 53180  | 0.11 | N | L |        |        |                                         |
| 2540 | 10 | 10p12.1               | 27010665 | 27018864 | 8200   | 0.06 | N | L |        |        |                                         |
| 2541 | 10 | 10p12.1               | 27657907 | 27673110 | 15204  | 0.17 | Y | L |        |        |                                         |
| 2542 | 10 | 10p11.23              | 30870338 | 30914835 | 44498  | 0.06 | N | G |        |        |                                         |
| 2543 | 10 | 10p11.23              | 31194569 | 31200177 | 5609   | 0.06 | N | L |        |        |                                         |
| 2544 | 10 | 10p11.23              | 31208100 | 31256118 | 48019  | 0.06 | N | L |        |        |                                         |
| 2545 | 10 | 10p11.22              | 31806300 | 31856602 | 50303  | 0.20 | N | L | 609141 |        |                                         |
| 2546 | 10 | 10p11.22              | 32177238 | 32228325 | 51088  | 0.06 | N | L | 610577 |        |                                         |
| 2547 | 10 | 10p11.22              | 33990331 | 34006154 | 15824  | 0.06 | N | G |        |        |                                         |
| 2548 | 10 | 10p11.21              | 36450716 | 36461158 | 10443  | 0.08 | Y | L |        |        |                                         |
| 2549 | 10 | 10p11.21              | 37344126 | 37363792 | 19667  | 0.14 | Y | L |        |        |                                         |
| 2550 | 10 | 10p11.21              | 37545198 | 37559949 | 14752  | 0.17 | Y | L | 610856 |        |                                         |
| 2551 | 10 | 10q11.1               | 41763282 | 41843576 | 80295  | 1.84 | Y | L |        |        |                                         |
| 2552 | 10 | 10q11.1               | 41941094 | 41955523 | 14430  | 0.11 | Y | G |        |        |                                         |
| 2553 | 10 | 10q11.1-<br>10q11.21  | 41970130 | 42339207 | 369078 | 0.64 | Y | C |        |        |                                         |
| 2554 | 10 | 10q11.21              | 44069877 | 44072982 | 3106   | 0.84 | N | L |        |        |                                         |
| 2555 | 10 | 10q11.21              | 44214977 | 44231831 | 16855  | 0.06 | N | L |        |        |                                         |
| 2556 | 10 | 10q11.22              | 47005397 | 47169175 | 163779 | 0.70 | Y | C |        |        |                                         |
| 2557 | 10 | 10q11.22              | 49750317 | 49757007 | 6691   | 0.06 | N | L |        |        |                                         |
| 2558 | 10 | 10q11.23              | 52349873 | 52371891 | 22019  | 0.08 | N | L |        |        |                                         |
| 2559 | 10 | 10q11.23              | 52862928 | 52877640 | 14713  | 0.06 | Y | L | 176894 |        |                                         |
| 2560 | 10 | 10q11.23              | 52973403 | 53023313 | 49911  | 1.09 | Y | L | 176894 |        |                                         |
| 2561 | 10 | 10q11.23              | 53184998 | 53275104 | 90107  | 0.59 | Y | L | 176894 |        |                                         |
| 2562 | 10 | 10q21.1               | 53565456 | 53580014 | 14559  | 0.36 | Y | L | 176894 |        |                                         |
| 2563 | 10 | 10q21.1               | 53680643 | 53719352 | 38710  | 0.95 | Y | L | 176894 |        |                                         |
| 2564 | 10 | 10q21.1               | 54148013 | 54159146 | 11134  | 0.06 | N | L |        |        |                                         |
| 2565 | 10 | 10q21.1               | 54252943 | 54268909 | 15967  | 0.11 | N | L |        |        |                                         |
| 2566 | 10 | 10q21.1               | 54432539 | 54461657 | 29119  | 0.73 | Y | L |        |        |                                         |
| 2567 | 10 | 10q21.1               | 54500248 | 54611379 | 111132 | 3.88 | Y | L |        |        |                                         |
| 2568 | 10 | 10q21.1               | 54812071 | 54831811 | 19741  | 0.17 | Y | G |        |        |                                         |
| 2569 | 10 | 10q21.1               | 55463297 | 55475656 | 12360  | 0.06 | Y | L | 609533 |        |                                         |
| 2570 | 10 | 10q21.1               | 55697321 | 55768689 | 71369  | 0.17 | Y | L | 609533 |        |                                         |
| 2571 | 10 | 10q21.1               | 55866325 | 55874297 | 7973   | 0.06 | Y | L | 609533 |        |                                         |
| 2572 | 10 | 10q21.1               | 56575237 | 56602643 | 27407  | 0.06 | Y | L |        |        |                                         |
| 2573 | 10 | 10q21.1               | 56779323 | 56814582 | 35260  | 0.42 | Y | L |        |        |                                         |
| 2574 | 10 | 10q21.1               | 56829988 | 56853055 | 23068  | 0.08 | Y | L |        |        |                                         |
| 2575 | 10 | 10q21.1               | 56903392 | 57272445 | 369054 | 0.87 | Y | L |        |        |                                         |
| 2576 | 10 | 10q21.1               | 57420720 | 57462349 | 41630  | 2.63 | Y | L |        |        |                                         |
| 2577 | 10 | 10q21.1               | 57648567 | 57669723 | 21157  | 0.59 | Y | C |        |        |                                         |
| 2578 | 10 | 10q21.1               | 57941961 | 58000526 | 58566  | 0.39 | Y | L |        |        |                                         |
| 2579 | 10 | 10q21.1               | 58177406 | 58180737 | 3332   | 0.08 | Y | L |        |        |                                         |
| 2580 | 10 | 10q21.1               | 58316702 | 58811369 | 494668 | 2.35 | Y | L |        |        |                                         |
| 2581 | 10 | 10q21.1               | 58920429 | 58933746 | 13318  | 0.06 | N | L |        |        |                                         |
| 2582 | 10 | 10q21.1               | 59116227 | 59142811 | 26585  | 0.06 | N | L |        |        |                                         |
| 2583 | 10 | 10q21.1               | 59192071 | 59239095 | 47025  | 0.48 | Y | C |        |        |                                         |
| 2584 | 10 | 10q21.1               | 59242689 | 59441474 | 198786 | 0.89 | Y | L |        |        |                                         |
| 2585 | 10 | 10q21.1               | 59948146 | 59980486 | 32341  | 4.72 | Y | L |        |        |                                         |
| 2586 | 10 | 10q21.1               | 60747220 | 60771162 | 23943  | 0.06 | Y | L |        |        |                                         |
| 2587 | 10 | 10q21.1               | 60806221 | 60822741 | 16521  | 0.06 | N | L |        |        |                                         |
| 2588 | 10 | 10q21.1               | 60918797 | 60933418 | 14622  | 0.20 | N | L |        |        |                                         |
| 2589 | 10 | 10q21.1               | 61028069 | 61046734 | 18666  | 0.06 | Y | L |        |        |                                         |
| 2590 | 10 | 10q21.2               | 61277894 | 61302634 | 24741  | 0.14 | N | L | 601985 | 601985 | Thyroid papillary carcinoma, 188550 (1) |
| 2591 | 10 | 10q21.2               | 61931788 | 61968129 | 36342  | 0.56 | N | L |        |        |                                         |
| 2592 | 10 | 10q21.2               | 62510173 | 62538706 | 28534  | 0.08 | N | L |        |        |                                         |
| 2593 | 10 | 10q21.2               | 62552793 | 62583000 | 30208  | 0.84 | N | L |        |        |                                         |

|      |    |                     |           |           |        |      |   |   |        |
|------|----|---------------------|-----------|-----------|--------|------|---|---|--------|
| 2594 | 10 | 10q21.2             | 62626220  | 62651686  | 25467  | 0.22 | N | L |        |
| 2595 | 10 | 10q21.2             | 62747989  | 62787136  | 39148  | 0.14 | N | L |        |
| 2596 | 10 | 10q21.2             | 62963064  | 63051019  | 87956  | 2.24 | N | L |        |
| 2597 | 10 | 10q21.2-<br>10q21.3 | 64761165  | 64852714  | 91550  | 0.06 | Y | L | 604503 |
| 2598 | 10 | 10q21.3             | 65638340  | 65650085  | 11746  | 0.14 | Y | L |        |
| 2599 | 10 | 10q21.3             | 65716018  | 65783758  | 67741  | 1.20 | Y | L |        |
| 2600 | 10 | 10q21.3             | 66054965  | 66070513  | 15549  | 0.14 | Y | L |        |
| 2601 | 10 | 10q21.3             | 66364553  | 66400243  | 35691  | 0.20 | N | L |        |
| 2602 | 10 | 10q21.3             | 66486175  | 66526079  | 39905  | 0.48 | Y | L |        |
| 2603 | 10 | 10q21.3             | 66622862  | 66677954  | 55093  | 0.06 | Y | L |        |
| 2604 | 10 | 10q21.3             | 66726217  | 66782551  | 56335  | 5.11 | Y | L |        |
| 2605 | 10 | 10q21.3             | 66814396  | 66844459  | 30064  | 0.11 | N | L |        |
| 2606 | 10 | 10q21.3             | 66958252  | 66997173  | 38922  | 3.58 | Y | C |        |
| 2607 | 10 | 10q21.3             | 67472107  | 67543294  | 71188  | 0.08 | Y | L | 607667 |
| 2608 | 10 | 10q21.3             | 67620221  | 67630434  | 10214  | 0.20 | Y | L | 607667 |
| 2609 | 10 | 10q21.3             | 67694508  | 67755493  | 60986  | 0.06 | Y | L | 607667 |
| 2610 | 10 | 10q21.3             | 67809002  | 68296574  | 487573 | 1.59 | Y | L | 607667 |
| 2611 | 10 | 10q21.3             | 68406024  | 68420761  | 14738  | 0.06 | Y | L | 607667 |
| 2612 | 10 | 10q21.3             | 68516493  | 68539708  | 23216  | 0.14 | Y | L | 607667 |
| 2613 | 10 | 10q21.3             | 70947888  | 70961897  | 14010  | 7.52 | Y | C |        |
| 2614 | 10 | 10q22.1             | 73900499  | 73979953  | 79455  | 0.11 | N | L | 605084 |
| 2615 | 10 | 10q22.2             | 75597975  | 75669096  | 71122  | 0.50 | Y | L | 102750 |
| 2616 | 10 | 10q22.2             | 77358968  | 77378501  | 19534  | 0.11 | Y | L |        |
| 2617 | 10 | 10q22.3             | 77455961  | 77473753  | 17793  | 0.06 | N | L |        |
| 2618 | 10 | 10q22.3             | 77897695  | 77935135  | 37441  | 0.08 | Y | L |        |
| 2619 | 10 | 10q22.3             | 77983102  | 78130956  | 147855 | 0.11 | Y | L |        |
| 2620 | 10 | 10q22.3             | 81778812  | 81785822  | 7011   | 0.08 | Y | L |        |
| 2621 | 10 | 10q23.1             | 82786610  | 82810050  | 23441  | 0.08 | N | L |        |
| 2622 | 10 | 10q23.1             | 83128737  | 83173816  | 45080  | 0.39 | N | L |        |
| 2623 | 10 | 10q23.1             | 83657890  | 83789535  | 131646 | 1.98 | N | C | 605533 |
| 2624 | 10 | 10q23.1             | 84022802  | 84084032  | 61231  | 0.14 | Y | L | 605533 |
| 2625 | 10 | 10q23.1             | 84137669  | 84208644  | 70976  | 0.20 | N | L | 605533 |
| 2626 | 10 | 10q23.1             | 85138053  | 85192417  | 54365  | 1.65 | Y | L |        |
| 2627 | 10 | 10q23.1             | 85442761  | 85490003  | 47243  | 0.25 | N | L |        |
| 2628 | 10 | 10q23.1             | 86801875  | 86836354  | 34480  | 0.36 | N | L |        |
| 2629 | 10 | 10q23.1             | 87034940  | 87059703  | 24764  | 0.34 | N | L |        |
| 2630 | 10 | 10q23.1             | 87064004  | 87068583  | 4580   | 0.17 | N | G |        |
| 2631 | 10 | 10q23.1             | 87120989  | 87188772  | 67784  | 0.61 | N | L |        |
| 2632 | 10 | 10q23.1             | 87266608  | 87320736  | 54129  | 1.12 | N | L |        |
| 2633 | 10 | 10q23.1             | 87328642  | 87341129  | 12488  | 0.25 | N | L |        |
| 2634 | 10 | 10q23.2             | 89170217  | 89252967  | 82751  | 0.14 | Y | C |        |
| 2635 | 10 | 10q23.31            | 89947013  | 89964738  | 17726  | 0.06 | N | L |        |
| 2636 | 10 | 10q23.31            | 90066695  | 90112492  | 45798  | 0.06 | N | L | 609360 |
| 2637 | 10 | 10q23.31            | 90219214  | 90278961  | 59748  | 0.36 | N | L | 609360 |
| 2638 | 10 | 10q23.31            | 90339008  | 90347139  | 8132   | 0.14 | N | L |        |
| 2639 | 10 | 10q23.31            | 90496943  | 90557082  | 60140  | 1.57 | Y | L |        |
| 2640 | 10 | 10q23.31            | 90579096  | 90614326  | 35231  | 0.08 | Y | L |        |
| 2641 | 10 | 10q23.31            | 90658194  | 90703175  | 44982  | 0.06 | Y | L | 612352 |
| 2642 | 10 | 10q23.31            | 91516697  | 91524697  | 8001   | 0.11 | N | L | 605498 |
| 2643 | 10 | 10q23.31            | 91619218  | 91635506  | 16289  | 0.06 | N | L |        |
| 2644 | 10 | 10q23.31            | 91946336  | 91960668  | 14333  | 0.34 | Y | L |        |
| 2645 | 10 | 10q23.31            | 91973119  | 91995060  | 21942  | 0.56 | Y | L |        |
| 2646 | 10 | 10q23.31            | 92088911  | 92127615  | 38705  | 0.06 | Y | L |        |
| 2647 | 10 | 10q23.31            | 92312792  | 92364806  | 52015  | 0.25 | Y | L |        |
| 2648 | 10 | 10q23.31            | 92447226  | 92490499  | 43274  | 0.22 | Y | L |        |
| 2649 | 10 | 10q24.1             | 98048824  | 98051775  | 2952   | 0.06 | N | G |        |
| 2650 | 10 | 10q24.2             | 100610846 | 100638261 | 27416  | 0.36 | N | L |        |
| 2651 | 10 | 10q24.2             | 100949974 | 100972884 | 22911  | 0.06 | N | L |        |
| 2652 | 10 | 10q24.32            | 103926973 | 103957580 | 30608  | 0.06 | N | L |        |
| 2653 | 10 | 10q25.1             | 106709781 | 106810248 | 100468 | 0.11 | N | L | 606285 |
| 2654 | 10 | 10q25.1             | 106935916 | 106957260 | 21345  | 0.08 | N | L | 606285 |
| 2655 | 10 | 10q25.1             | 107196395 | 107221832 | 25438  | 0.31 | Y | L |        |
| 2656 | 10 | 10q25.1             | 107689216 | 107697771 | 8556   | 0.06 | Y | L |        |
| 2657 | 10 | 10q25.1             | 107776006 | 107789804 | 13799  | 0.17 | N | L |        |
| 2658 | 10 | 10q25.1             | 107889182 | 107914544 | 25363  | 0.36 | N | L |        |
| 2659 | 10 | 10q25.1             | 108225898 | 108234676 | 8779   | 0.06 | N | L |        |
| 2660 | 10 | 10q25.1             | 109111422 | 109139265 | 27844  | 3.41 | Y | L |        |
| 2661 | 10 | 10q25.1             | 109157704 | 109173838 | 16135  | 0.08 | N | L |        |
| 2662 | 10 | 10q25.1             | 109255202 | 109277575 | 22374  | 0.06 | N | L |        |
| 2663 | 10 | 10q25.1             | 109575699 | 109597336 | 21638  | 0.53 | N | L |        |
| 2664 | 10 | 10q25.1             | 109947021 | 110006535 | 59515  | 0.08 | N | L |        |
| 2665 | 10 | 10q25.1             | 110366455 | 110410835 | 44381  | 0.92 | N | L |        |
| 2666 | 10 | 10q25.1             | 110503949 | 110539980 | 36032  | 0.39 | Y | L |        |

|      |    |                     |           |           |        |       |   |   |        |        |                                                                                                     |
|------|----|---------------------|-----------|-----------|--------|-------|---|---|--------|--------|-----------------------------------------------------------------------------------------------------|
| 2667 | 10 | 10q25.1             | 110566569 | 110667761 | 101193 | 0.25  | Y | L |        |        |                                                                                                     |
| 2668 | 10 | 10q25.1             | 110670667 | 110696941 | 26275  | 0.36  | Y | L |        |        |                                                                                                     |
| 2669 | 10 | 10q25.2             | 113196208 | 113211492 | 15285  | 0.08  | N | L |        |        |                                                                                                     |
| 2670 | 10 | 10q25.2             | 113512001 | 113527642 | 15642  | 0.14  | Y | L |        |        |                                                                                                     |
| 2671 | 10 | 10q25.2             | 114249712 | 114271491 | 21780  | 0.06  | N | L |        |        |                                                                                                     |
| 2672 | 10 | 10q25.3             | 117213595 | 117234975 | 21381  | 0.11  | N | L | 612869 |        |                                                                                                     |
| 2673 | 10 | 10q25.3             | 117301088 | 117360540 | 59453  | 0.28  | N | L | 612869 |        |                                                                                                     |
| 2674 | 10 | 10q25.3             | 117417474 | 117458618 | 41145  | 0.11  | Y | L | 612869 |        |                                                                                                     |
| 2675 | 10 | 10q25.3             | 117701924 | 117717708 | 15785  | 0.06  | N | L |        |        |                                                                                                     |
| 2676 | 10 | 10q26.11            | 121229086 | 121261911 | 32826  | 0.11  | N | L | 602856 |        |                                                                                                     |
| 2677 | 10 | 10q26.12            | 122878545 | 122890613 | 12069  | 0.36  | Y | L |        |        |                                                                                                     |
| 2678 | 10 | 10q26.12            | 122909069 | 122917744 | 8676   | 0.06  | N | L |        |        |                                                                                                     |
| 2679 | 10 | 10q26.13            | 124295769 | 124374585 | 78817  | 4.53  | Y | C | 601969 | 601969 | Glioblastoma<br>multiforme,<br>somatic, 137800 (3)                                                  |
| 2680 | 10 | 10q26.13            | 124720495 | 124730611 | 10117  | 0.06  | Y | L | 611310 |        |                                                                                                     |
| 2681 | 10 | 10q26.2             | 127648027 | 127661193 | 13167  | 0.17  | Y | L | 611640 |        |                                                                                                     |
| 2682 | 10 | 10q26.3             | 130636360 | 130643846 | 7487   | 0.39  | N | L |        |        |                                                                                                     |
| 2683 | 10 | 10q26.3             | 132121586 | 132140656 | 19071  | 0.14  | Y | C |        |        |                                                                                                     |
| 2684 | 10 | 10q26.3             | 132497389 | 132511174 | 13786  | 0.06  | Y | L |        |        |                                                                                                     |
| 2685 | 10 | 10q26.3             | 134246296 | 134265793 | 19498  | 0.06  | Y | L | 600106 |        |                                                                                                     |
| 2686 | 10 | 10q26.3             | 135102985 | 135250240 | 147256 | 0.78  | Y | C | 124040 |        |                                                                                                     |
| 2687 | 11 | 11p15.5             | 1005383   | 1011155   | 5773   | 0.08  | Y | C | 158374 |        |                                                                                                     |
| 2688 | 11 | 11p15.5             | 1058040   | 1078527   | 20488  | 0.45  | Y | C | 158370 |        |                                                                                                     |
| 2689 | 11 | 11p15.5             | 1856122   | 1933250   | 77129  | 1.68  | Y | C | 153432 |        |                                                                                                     |
| 2690 | 11 | 11p15.4             | 3894921   | 3929659   | 34739  | 0.06  | N | L | 605921 | 605921 | Immune<br>dysfunction, with T-<br>cell inactivation due<br>to calcium entry<br>defect 2, 612783 (3) |
| 2691 | 11 | 11p15.4             | 4195220   | 4327444   | 132225 | 2.43  | Y | C |        |        |                                                                                                     |
| 2692 | 11 | 11p15.4             | 4466861   | 4518966   | 52106  | 0.08  | Y | L |        |        |                                                                                                     |
| 2693 | 11 | 11p15.4             | 4911183   | 4920782   | 9600   | 0.11  | Y | L |        |        |                                                                                                     |
| 2694 | 11 | 11p15.4             | 4923827   | 4935772   | 11946  | 19.54 | Y | C |        |        |                                                                                                     |
| 2695 | 11 | 11p15.4             | 5083047   | 5109837   | 26791  | 0.08  | Y | L |        |        |                                                                                                     |
| 2696 | 11 | 11p15.4             | 5368648   | 5381414   | 12767  | 0.11  | Y | L |        |        |                                                                                                     |
| 2697 | 11 | 11p15.4             | 5739501   | 5769082   | 29582  | 9.00  | Y | L |        |        |                                                                                                     |
| 2698 | 11 | 11p15.4             | 5834709   | 5890620   | 55912  | 0.56  | Y | C |        |        |                                                                                                     |
| 2699 | 11 | 11p15.3             | 11832474  | 11875274  | 42801  | 0.06  | N | L |        |        |                                                                                                     |
| 2700 | 11 | 11p15.2             | 14637090  | 14818475  | 181386 | 0.06  | N | L | 602047 |        |                                                                                                     |
| 2701 | 11 | 11p15.2             | 15234339  | 15256698  | 22360  | 0.22  | N | L |        |        |                                                                                                     |
| 2702 | 11 | 11p15.2             | 15387984  | 15445577  | 57594  | 0.17  | N | L |        |        |                                                                                                     |
| 2703 | 11 | 11p15.2             | 15475282  | 15480220  | 4939   | 0.08  | N | L |        |        |                                                                                                     |
| 2704 | 11 | 11p15.2             | 15702819  | 15719032  | 16214  | 0.08  | N | L |        |        |                                                                                                     |
| 2705 | 11 | 11p15.2             | 15979442  | 16026672  | 47231  | 0.75  | N | L | 607257 |        |                                                                                                     |
| 2706 | 11 | 11p15.1             | 16138743  | 16167388  | 28646  | 0.11  | N | L | 607257 |        |                                                                                                     |
| 2707 | 11 | 11p15.1             | 16301420  | 16319151  | 17732  | 0.06  | N | L | 607257 |        |                                                                                                     |
| 2708 | 11 | 11p15.1             | 18895726  | 18928123  | 32398  | 7.80  | Y | C | 607227 |        |                                                                                                     |
| 2709 | 11 | 11p15.1             | 19875966  | 19883791  | 7826   | 0.06  | N | L | 607026 |        |                                                                                                     |
| 2710 | 11 | 11p15.1             | 21345470  | 21395190  | 49721  | 5.25  | N | L | 602319 |        |                                                                                                     |
| 2711 | 11 | 11p15.1-<br>11p14.3 | 21443297  | 22112771  | 669475 | 3.75  | Y | L | 602319 |        |                                                                                                     |
| 2712 | 11 | 11p14.3             | 22182573  | 22206188  | 23616  | 0.67  | N | L | 608662 | 608662 | Gnthodiaphyseal<br>dysplasia, 166260<br>(3)                                                         |
| 2713 | 11 | 11p14.3             | 22422940  | 22457941  | 35002  | 0.39  | Y | L |        |        |                                                                                                     |
| 2714 | 11 | 11p14.3             | 23730424  | 23801551  | 71128  | 1.26  | Y | L |        |        |                                                                                                     |
| 2715 | 11 | 11p14.3             | 24021518  | 24087684  | 66167  | 0.08  | N | L |        |        |                                                                                                     |
| 2716 | 11 | 11p14.3             | 24098510  | 24404824  | 306315 | 0.45  | Y | L |        |        |                                                                                                     |
| 2717 | 11 | 11p14.3             | 24419205  | 24467354  | 48150  | 1.06  | N | L |        |        |                                                                                                     |
| 2718 | 11 | 11p14.3             | 24514743  | 24545815  | 31073  | 0.22  | N | L | 608178 |        |                                                                                                     |
| 2719 | 11 | 11p14.3             | 24708320  | 24714405  | 6086   | 0.11  | N | L | 608178 |        |                                                                                                     |
| 2720 | 11 | 11p14.3             | 24815264  | 24841295  | 26032  | 0.06  | Y | G | 608178 |        |                                                                                                     |
| 2721 | 11 | 11p14.3             | 24858808  | 24868321  | 9514   | 0.25  | Y | L | 608178 |        |                                                                                                     |
| 2722 | 11 | 11p14.3             | 25035470  | 25050419  | 14950  | 0.06  | Y | L | 608178 |        |                                                                                                     |
| 2723 | 11 | 11p14.3             | 25158485  | 25657046  | 498562 | 6.12  | Y | L |        |        |                                                                                                     |
| 2724 | 11 | 11p14.3             | 25712397  | 25727828  | 15432  | 0.17  | Y | L |        |        |                                                                                                     |
| 2725 | 11 | 11p14.3             | 25735910  | 25757496  | 21587  | 0.08  | Y | L |        |        |                                                                                                     |
| 2726 | 11 | 11p14.3             | 25823062  | 25860654  | 37593  | 0.08  | N | L |        |        |                                                                                                     |
| 2727 | 11 | 11p14.3             | 25873758  | 25877586  | 3829   | 0.06  | N | L |        |        |                                                                                                     |
| 2728 | 11 | 11p14.2             | 26184171  | 26202143  | 17973  | 0.11  | N | L |        |        |                                                                                                     |
| 2729 | 11 | 11p14.2             | 26367506  | 26402649  | 35144  | 0.95  | Y | L | 610110 |        |                                                                                                     |
| 2730 | 11 | 11p14.2             | 26504400  | 26512971  | 8572   | 0.06  | N | L | 610110 |        |                                                                                                     |
| 2731 | 11 | 11p14.2             | 26716011  | 26740497  | 24487  | 1.26  | N | L |        |        |                                                                                                     |



|      |    |                      |          |          |         |       |   |   |        |
|------|----|----------------------|----------|----------|---------|-------|---|---|--------|
| 2732 | 11 | 11p14.2              | 26767252 | 26781944 | 14693   | 0.11  | N | L |        |
| 2733 | 11 | 11p14.2              | 26916951 | 26949273 | 32323   | 0.06  | N | L |        |
| 2734 | 11 | 11p14.2              | 27063306 | 27095686 | 32381   | 0.11  | N | L | 603312 |
| 2735 | 11 | 11p14.1              | 27851559 | 27899528 | 47970   | 0.50  | N | L |        |
| 2736 | 11 | 11p14.1              | 28896280 | 28917283 | 21004   | 0.08  | Y | L |        |
| 2737 | 11 | 11p14.1              | 29073331 | 29152900 | 79570   | 3.24  | Y | L |        |
| 2738 | 11 | 11p14.1              | 29332685 | 29346761 | 14077   | 0.08  | N | L |        |
| 2739 | 11 | 11p14.1              | 29631919 | 29686847 | 54929   | 1.37  | N | L |        |
| 2740 | 11 | 11p14.1              | 30664211 | 30731101 | 66891   | 0.73  | N | L |        |
| 2741 | 11 | 11p13                | 31351252 | 31368223 | 16972   | 0.06  | Y | L | 611072 |
| 2742 | 11 | 11p13                | 31466253 | 31511347 | 45095   | 0.06  | Y | L | 612323 |
| 2743 | 11 | 11p13                | 31606051 | 31635624 | 29574   | 0.11  | N | L | 606985 |
| 2744 | 11 | 11p13                | 32412103 | 32432060 | 19958   | 0.11  | Y | L | 608978 |
| 2745 | 11 | 11p13                | 33030654 | 33045141 | 14488   | 0.28  | N | L |        |
| 2746 | 11 | 11p13                | 33093237 | 33117175 | 23939   | 0.06  | N | L | 600367 |
| 2747 | 11 | 11p12                | 36817806 | 36844938 | 27133   | 0.22  | Y | L |        |
| 2748 | 11 | 11p12                | 37015890 | 37106456 | 90567   | 3.97  | Y | L |        |
| 2749 | 11 | 11p12                | 37280164 | 37313290 | 33127   | 0.61  | N | L |        |
| 2750 | 11 | 11p12                | 37517450 | 37572494 | 55045   | 1.90  | N | L |        |
| 2751 | 11 | 11p12                | 37604307 | 37613063 | 8757    | 0.20  | N | L |        |
| 2752 | 11 | 11p12                | 37691027 | 37766857 | 75831   | 1.68  | Y | L |        |
| 2753 | 11 | 11p12                | 38309876 | 38319461 | 9586    | 0.06  | N | L |        |
| 2754 | 11 | 11p12                | 39218765 | 39228629 | 9865    | 0.11  | N | L |        |
| 2755 | 11 | 11p12                | 40014790 | 40059238 | 44449   | 1.79  | N | L |        |
| 2756 | 11 | 11p12                | 40364351 | 40391182 | 26832   | 0.34  | N | L |        |
| 2757 | 11 | 11p12                | 40930675 | 40944750 | 14076   | 0.34  | Y | L |        |
| 2758 | 11 | 11p12                | 41028089 | 41044387 | 16299   | 0.06  | Y | L |        |
| 2759 | 11 | 11p12                | 41288538 | 41304985 | 16448   | 0.42  | Y | L |        |
| 2760 | 11 | 11p12                | 41388102 | 41424221 | 36120   | 0.06  | N | L |        |
| 2761 | 11 | 11p12                | 41770750 | 41774978 | 4229    | 0.06  | Y | L |        |
| 2762 | 11 | 11p12                | 41789724 | 41795297 | 5574    | 0.20  | N | L |        |
| 2763 | 11 | 11p12                | 41971203 | 41994582 | 23380   | 0.06  | N | L |        |
| 2764 | 11 | 11p12                | 42195598 | 42255848 | 60251   | 0.08  | Y | L |        |
| 2765 | 11 | 11p12                | 42388994 | 42397734 | 8741    | 0.14  | N | L |        |
| 2766 | 11 | 11p12                | 42638768 | 42661356 | 22589   | 0.06  | N | L |        |
| 2767 | 11 | 11p12                | 42752881 | 42790723 | 37843   | 0.81  | Y | L |        |
| 2768 | 11 | 11p12                | 43118793 | 43171303 | 52511   | 1.37  | N | L |        |
| 2769 | 11 | 11p11.2              | 47612659 | 47619442 | 6784    | 0.06  | Y | L |        |
| 2770 | 11 | 11p11.2              | 48234630 | 48254241 | 19612   | 0.11  | N | L |        |
| 2771 | 11 | 11p11.2              | 48330729 | 48401406 | 70678   | 0.06  | Y | L |        |
| 2772 | 11 | 11p11.2-<br>11p11.12 | 48535899 | 48848453 | 312555  | 3.30  | Y | L |        |
| 2773 | 11 | 11p11.12             | 49182980 | 49224929 | 41950   | 0.08  | Y | L | 600934 |
| 2774 | 11 | 11p11.12             | 49715216 | 49720512 | 5297    | 1.17  | Y | L |        |
| 2775 | 11 | 11p11.12             | 50052671 | 50210733 | 158063  | 0.22  | Y | C |        |
| 2776 | 11 | 11p11.12             | 50247633 | 51331093 | 1083461 | 16.46 | Y | C |        |
| 2777 | 11 | 11q11                | 54551083 | 54796237 | 245155  | 3.27  | Y | L |        |
| 2778 | 11 | 11q11                | 54814774 | 54951831 | 137058  | 2.63  | Y | L |        |
| 2779 | 11 | 11q11                | 55009954 | 55078787 | 68834   | 0.06  | Y | L |        |
| 2780 | 11 | 11q11                | 55117835 | 55209409 | 91575   | 15.65 | Y | C |        |
| 2781 | 11 | 11q11                | 55648448 | 55652591 | 4144    | 0.08  | N | L |        |
| 2782 | 11 | 11q11                | 56293234 | 56355203 | 61970   | 1.34  | N | L |        |
| 2783 | 11 | 11q12.1              | 56426689 | 56445925 | 19237   | 0.06  | Y | L |        |
| 2784 | 11 | 11q12.1              | 57602887 | 57661128 | 58242   | 0.08  | Y | L |        |
| 2785 | 11 | 11q12.1              | 57772107 | 57775284 | 3178    | 0.06  | N | L |        |
| 2786 | 11 | 11q12.1              | 58566718 | 58610745 | 44028   | 1.03  | Y | C |        |
| 2787 | 11 | 11q12.2              | 60170655 | 60218072 | 47418   | 0.06  | N | L |        |
| 2788 | 11 | 11q12.3              | 62674829 | 62718458 | 43630   | 0.08  | Y | L | 610792 |
| 2789 | 11 | 11q13.2              | 67243221 | 67488532 | 245312  | 0.06  | Y | L |        |
| 2790 | 11 | 11q13.4              | 73693247 | 73712121 | 18875   | 0.06  | Y | L | 608987 |
| 2791 | 11 | 11q14.1              | 79327246 | 79436480 | 109235  | 0.22  | Y | L |        |
| 2792 | 11 | 11q14.1              | 79658191 | 79755082 | 96892   | 5.31  | Y | L |        |
| 2793 | 11 | 11q14.1              | 79794980 | 79838137 | 43158   | 0.31  | N | L |        |
| 2794 | 11 | 11q14.1              | 80049889 | 80077061 | 27173   | 0.11  | Y | L |        |
| 2795 | 11 | 11q14.1              | 80204529 | 80219904 | 15376   | 0.06  | N | L |        |
| 2796 | 11 | 11q14.1              | 80286933 | 80354744 | 67812   | 0.25  | N | L |        |
| 2797 | 11 | 11q14.1              | 80518964 | 80583269 | 64306   | 0.25  | Y | L |        |
| 2798 | 11 | 11q14.1              | 80611804 | 80818447 | 206644  | 0.56  | Y | L |        |
| 2799 | 11 | 11q14.1              | 80873188 | 80994524 | 121337  | 1.06  | N | L |        |
| 2800 | 11 | 11q14.1              | 81034304 | 81164986 | 130683  | 0.11  | Y | L |        |
| 2801 | 11 | 11q14.1              | 81181573 | 81203465 | 21893   | 0.06  | Y | L |        |
| 2802 | 11 | 11q14.1              | 81446737 | 81471485 | 24749   | 0.06  | Y | L |        |
| 2803 | 11 | 11q14.1              | 81521808 | 81565931 | 44124   | 0.14  | Y | L |        |
| 2804 | 11 | 11q14.1              | 81596997 | 81651304 | 54308   | 0.67  | N | L |        |

|      |    |         |           |           |        |      |   |   |        |        |                                   |
|------|----|---------|-----------|-----------|--------|------|---|---|--------|--------|-----------------------------------|
| 2805 | 11 | 11q14.1 | 81731185  | 81765896  | 34712  | 0.89 | N | L |        |        |                                   |
| 2806 | 11 | 11q14.1 | 82856844  | 82882102  | 25259  | 0.53 | Y | L | 603583 |        |                                   |
| 2807 | 11 | 11q14.1 | 83378652  | 83440787  | 62136  | 0.06 | N | L | 603583 |        |                                   |
| 2808 | 11 | 11q14.1 | 83837002  | 83862958  | 25957  | 1.06 | N | L | 603583 |        |                                   |
| 2809 | 11 | 11q14.1 | 84080832  | 84100327  | 19496  | 0.28 | N | L | 603583 |        |                                   |
| 2810 | 11 | 11q14.1 | 84208218  | 84236319  | 28102  | 0.11 | Y | L | 603583 |        |                                   |
| 2811 | 11 | 11q14.1 | 84273766  | 84287750  | 13985  | 0.06 | N | L | 603583 |        |                                   |
| 2812 | 11 | 11q14.1 | 84428334  | 84468782  | 40449  | 0.56 | Y | L |        |        |                                   |
| 2813 | 11 | 11q14.2 | 86607894  | 86643039  | 35146  | 0.11 | N | L |        |        |                                   |
| 2814 | 11 | 11q14.2 | 87239198  | 87346531  | 107334 | 6.43 | Y | L |        |        |                                   |
| 2815 | 11 | 11q14.2 | 87450170  | 87478106  | 27937  | 1.01 | N | L |        |        |                                   |
| 2816 | 11 | 11q14.3 | 88013717  | 88049581  | 35865  | 1.12 | Y | L | 604102 |        |                                   |
| 2817 | 11 | 11q14.3 | 88069567  | 88157533  | 87967  | 1.59 | Y | L | 604102 |        |                                   |
| 2818 | 11 | 11q14.3 | 88470985  | 88540000  | 69016  | 1.45 | Y | L |        |        |                                   |
| 2819 | 11 | 11q14.3 | 88748749  | 88805304  | 56556  | 0.08 | Y | L | 605261 |        |                                   |
| 2820 | 11 | 11q14.3 | 88980209  | 88988935  | 8727   | 0.11 | Y | L |        |        |                                   |
| 2821 | 11 | 11q14.3 | 89458252  | 89538230  | 79979  | 0.11 | Y | L | 611636 |        |                                   |
| 2822 | 11 | 11q14.3 | 89678228  | 89826508  | 148281 | 0.17 | Y | L |        |        |                                   |
| 2823 | 11 | 11q14.3 | 89855586  | 89887386  | 31801  | 0.89 | N | L |        |        |                                   |
| 2824 | 11 | 11q14.3 | 90109953  | 90133150  | 23198  | 0.14 | N | L |        |        |                                   |
| 2825 | 11 | 11q14.3 | 90566190  | 90686768  | 120579 | 2.82 | Y | L |        |        |                                   |
| 2826 | 11 | 11q14.3 | 91051171  | 91069236  | 18066  | 0.78 | N | L |        |        |                                   |
| 2827 | 11 | 11q14.3 | 91198708  | 91244390  | 45683  | 2.40 | N | L |        |        |                                   |
| 2828 | 11 | 11q14.3 | 91440357  | 91510546  | 70190  | 1.20 | Y | C |        |        |                                   |
| 2829 | 11 | 11q14.3 | 91618636  | 91680941  | 62306  | 1.34 | Y | L |        |        |                                   |
| 2830 | 11 | 11q14.3 | 91941298  | 91967526  | 26229  | 0.45 | N | L | 612483 |        |                                   |
| 2831 | 11 | 11q21   | 92402829  | 92492545  | 89717  | 0.06 | Y | L |        |        |                                   |
| 2832 | 11 | 11q21   | 92495882  | 92575828  | 79947  | 0.20 | Y | L |        |        |                                   |
| 2833 | 11 | 11q21   | 92999119  | 93021835  | 22717  | 0.08 | N | L |        |        |                                   |
| 2834 | 11 | 11q21   | 93360150  | 93387695  | 27546  | 0.06 | N | L |        |        |                                   |
| 2835 | 11 | 11q21   | 94089571  | 94102123  | 12553  | 0.06 | N | L |        |        |                                   |
| 2836 | 11 | 11q21   | 94891238  | 94981355  | 90118  | 1.68 | N | L |        |        |                                   |
| 2837 | 11 | 11q21   | 95028222  | 95061166  | 32945  | 0.42 | N | L |        |        |                                   |
| 2838 | 11 | 11q21   | 95139083  | 95159435  | 20353  | 0.11 | N | L |        |        |                                   |
| 2839 | 11 | 11q21   | 95917387  | 95962043  | 44657  | 0.08 | N | L |        |        |                                   |
| 2840 | 11 | 11q21   | 96179642  | 96191471  | 11830  | 0.06 | N | L |        |        |                                   |
| 2841 | 11 | 11q21   | 96647879  | 96690356  | 42478  | 2.82 | Y | L |        |        |                                   |
| 2842 | 11 | 11q22.1 | 96804312  | 96828210  | 23899  | 0.22 | Y | L |        |        |                                   |
| 2843 | 11 | 11q22.1 | 96946561  | 97199754  | 253194 | 0.20 | Y | L |        |        |                                   |
| 2844 | 11 | 11q22.1 | 97309468  | 97393678  | 84211  | 0.84 | Y | C |        |        |                                   |
| 2845 | 11 | 11q22.1 | 97609750  | 97634959  | 25210  | 0.22 | N | L |        |        |                                   |
| 2846 | 11 | 11q22.1 | 98155516  | 98184636  | 29121  | 0.06 | N | L |        |        |                                   |
| 2847 | 11 | 11q22.1 | 98258409  | 98303086  | 44678  | 0.25 | Y | L |        |        |                                   |
| 2848 | 11 | 11q22.1 | 98456126  | 98468700  | 12575  | 0.06 | Y | L | 607219 |        |                                   |
| 2849 | 11 | 11q22.1 | 98996747  | 99093686  | 96940  | 0.22 | Y | L | 607219 |        |                                   |
| 2850 | 11 | 11q22.1 | 99235200  | 99253667  | 18468  | 0.11 | N | L | 607219 |        |                                   |
| 2851 | 11 | 11q22.1 | 99670714  | 99688595  | 17882  | 0.36 | N | L | 607219 |        |                                   |
| 2852 | 11 | 11q22.1 | 99803631  | 99891485  | 87855  | 0.06 | N | L |        |        |                                   |
| 2853 | 11 | 11q22.1 | 99954328  | 99976146  | 21819  | 0.08 | N | L |        |        |                                   |
| 2854 | 11 | 11q22.1 | 100748743 | 100767635 | 18893  | 0.28 | N | L |        |        |                                   |
| 2855 | 11 | 11q22.2 | 101861555 | 101889532 | 27978  | 0.06 | N | L |        |        |                                   |
| 2856 | 11 | 11q22.3 | 102567464 | 102713593 | 146130 | 0.11 | Y | L | 603297 |        |                                   |
| 2857 | 11 | 11q22.3 | 103479298 | 103509777 | 30480  | 0.67 | Y | L | 609673 |        |                                   |
| 2858 | 11 | 11q22.3 | 103820456 | 103865864 | 45409  | 2.24 | Y | L |        |        |                                   |
| 2859 | 11 | 11q22.3 | 104264756 | 104286109 | 21354  | 0.14 | Y | L | 608633 | 608633 | {Sepsis, susceptibility to} (3)   |
| 2860 | 11 | 11q22.3 | 104455705 | 104515401 | 59697  | 0.50 | Y | L | 609490 |        |                                   |
| 2861 | 11 | 11q22.3 | 105074566 | 105100957 | 26392  | 0.14 | N | L | 138246 |        |                                   |
| 2862 | 11 | 11q22.3 | 105596868 | 105617263 | 20396  | 0.11 | N | L |        |        |                                   |
| 2863 | 11 | 11q22.3 | 106209460 | 106242434 | 32975  | 0.08 | N | L | 601244 |        |                                   |
| 2864 | 11 | 11q22.3 | 106373659 | 106425215 | 51557  | 1.20 | N | L | 601244 |        |                                   |
| 2865 | 11 | 11q22.3 | 107261761 | 107290406 | 28646  | 0.20 | Y | L |        |        |                                   |
| 2866 | 11 | 11q22.3 | 107659307 | 107685623 | 26317  | 0.06 | N | L | 607585 | 607585 | Ataxia-telangiectasia, 208900 (3) |
| 2867 | 11 | 11q22.3 | 108886345 | 108898049 | 11705  | 0.14 | N | L |        |        |                                   |
| 2868 | 11 | 11q23.1 | 110186162 | 110191508 | 5347   | 0.25 | N | L |        |        |                                   |
| 2869 | 11 | 11q23.1 | 111770882 | 111812201 | 41320  | 0.08 | N | L |        |        |                                   |
| 2870 | 11 | 11q23.1 | 112348635 | 112358378 | 9744   | 0.22 | N | L | 116930 |        |                                   |
| 2871 | 11 | 11q23.3 | 115597069 | 115603393 | 6325   | 0.06 | N | G |        |        |                                   |
| 2872 | 11 | 11q23.3 | 118055912 | 118062995 | 7084   | 0.06 | N | L |        |        |                                   |
| 2873 | 11 | 11q23.3 | 119008016 | 119021310 | 13295  | 0.08 | N | L |        |        |                                   |
| 2874 | 11 | 11q23.3 | 119277053 | 119293364 | 16312  | 0.14 | N | C |        |        |                                   |

|      |    |                      |           |           |        |       |   |   |        |
|------|----|----------------------|-----------|-----------|--------|-------|---|---|--------|
| 2875 | 11 | 11q23.3              | 120422541 | 120436157 | 13617  | 0.08  | N | L | 610451 |
| 2876 | 11 | 11q24.1              | 121536217 | 121558270 | 22054  | 0.89  | N | L |        |
| 2877 | 11 | 11q24.1              | 123252803 | 123306941 | 54139  | 0.67  | N | L |        |
| 2878 | 11 | 11q24.2              | 123591615 | 123600284 | 8670   | 0.14  | Y | G |        |
| 2879 | 11 | 11q24.2              | 123669821 | 123742528 | 72708  | 1.09  | N | L |        |
| 2880 | 11 | 11q24.2              | 123759474 | 123765798 | 6325   | 0.06  | Y | L |        |
| 2881 | 11 | 11q24.2              | 125294195 | 125307515 | 13321  | 0.78  | Y | L | 607663 |
| 2882 | 11 | 11q24.2              | 125739256 | 125765586 | 26331  | 0.14  | N | C | 104240 |
| 2883 | 11 | 11q24.2              | 126861482 | 126876478 | 14997  | 0.08  | N | L |        |
| 2884 | 11 | 11q24.3              | 127423404 | 127470981 | 47578  | 0.14  | N | L |        |
| 2885 | 11 | 11q25                | 133659157 | 133715886 | 56730  | 0.22  | Y | C |        |
| 2886 | 11 | 11q25                | 133855317 | 133891823 | 36507  | 0.06  | Y | L |        |
| 2887 | 11 | 11q25                | 134121027 | 134131333 | 10307  | 0.14  | Y | G |        |
| 2888 | 12 | 12p13.33             | 2230623   | 2241131   | 10509  | 0.11  | Y | C | 611875 |
| 2889 | 12 | 12p13.32             | 4614767   | 4663630   | 48864  | 0.06  | N | L | 604689 |
| 2890 | 12 | 12p13.32             | 5093809   | 5181956   | 88148  | 0.06  | Y | L |        |
| 2891 | 12 | 12p13.31             | 7867689   | 8022225   | 154537 | 0.59  | Y | C | 611039 |
| 2892 | 12 | 12p13.31             | 8452850   | 8482997   | 30148  | 1.54  | Y | C |        |
| 2893 | 12 | 12p13.31             | 9518505   | 9626238   | 107734 | 21.74 | Y | C |        |
| 2894 | 12 | 12p13.2              | 10124919  | 10140625  | 15707  | 0.08  | N | L | 606782 |
| 2895 | 12 | 12p13.2              | 10419835  | 10437192  | 17358  | 0.08  | N | G | 611817 |
| 2896 | 12 | 12p13.2              | 10462684  | 10491635  | 28952  | 8.05  | Y | C | 602892 |
| 2897 | 12 | 12p13.2              | 11389382  | 11434595  | 45214  | 1.37  | Y | C | 180989 |
| 2898 | 12 | 12p13.1              | 13424267  | 13430338  | 6072   | 0.11  | Y | L |        |
| 2899 | 12 | 12p13.1              | 13462356  | 13465212  | 2857   | 0.17  | Y | L |        |
| 2900 | 12 | 12p13.1              | 13692072  | 13746644  | 54573  | 0.06  | N | L | 138252 |
| 2901 | 12 | 12p12.3              | 15036403  | 15090411  | 54009  | 0.53  | N | L |        |
| 2902 | 12 | 12p12.3              | 16027219  | 16319824  | 292606 | 0.48  | Y | L |        |
| 2903 | 12 | 12p12.3              | 16462203  | 16508007  | 45805  | 0.39  | Y | L |        |
| 2904 | 12 | 12p12.3              | 16708464  | 16739429  | 30966  | 0.11  | N | L |        |
| 2905 | 12 | 12p12.3              | 16941773  | 16984622  | 42850  | 0.70  | N | L |        |
| 2906 | 12 | 12p12.3              | 17073839  | 17754579  | 680741 | 0.25  | Y | L |        |
| 2907 | 12 | 12p12.3              | 17813437  | 17834526  | 21090  | 0.06  | N | L |        |
| 2908 | 12 | 12p12.3              | 18190796  | 18219218  | 28423  | 0.22  | N | L |        |
| 2909 | 12 | 12p12.3              | 18584299  | 18598081  | 13783  | 0.08  | N | L | 609001 |
| 2910 | 12 | 12p12.3              | 18690649  | 18785426  | 94778  | 1.48  | N | L | 609001 |
| 2911 | 12 | 12p12.3              | 18893404  | 18925615  | 32212  | 0.11  | N | L |        |
| 2912 | 12 | 12p12.2              | 20049427  | 20063488  | 14062  | 0.20  | N | L |        |
| 2913 | 12 | 12p12.2              | 20319674  | 20340942  | 21269  | 0.11  | N | L |        |
| 2914 | 12 | 12p12.2              | 21070290  | 21112187  | 41898  | 0.48  | Y | L |        |
| 2915 | 12 | 12p12.1              | 21446005  | 21470336  | 24332  | 0.20  | Y | L |        |
| 2916 | 12 | 12p11.23             | 27539106  | 27542350  | 3245   | 0.14  | Y | L |        |
| 2917 | 12 | 12p11.22             | 28113274  | 28188714  | 75441  | 1.65  | Y | L |        |
| 2918 | 12 | 12p11.22             | 28349069  | 28364676  | 15608  | 0.06  | N | L |        |
| 2919 | 12 | 12p11.22             | 28506325  | 28556975  | 50651  | 2.49  | N | L |        |
| 2920 | 12 | 12p11.22             | 28889748  | 29004195  | 114448 | 1.01  | Y | L |        |
| 2921 | 12 | 12p11.22             | 29491271  | 29512141  | 20871  | 0.28  | N | L |        |
| 2922 | 12 | 12p11.22             | 30003139  | 30089408  | 86270  | 1.09  | Y | L |        |
| 2923 | 12 | 12p11.22             | 30105332  | 30113815  | 8484   | 0.06  | N | L |        |
| 2924 | 12 | 12p11.22             | 30125311  | 30134898  | 9588   | 0.08  | Y | L |        |
| 2925 | 12 | 12p11.22             | 30375951  | 30377571  | 1621   | 0.06  | N | L |        |
| 2926 | 12 | 12p11.21             | 32172560  | 32184926  | 12367  | 0.06  | Y | L | 602204 |
| 2927 | 12 | 12p11.21-<br>12p11.1 | 33185854  | 33215091  | 29238  | 4.95  | Y | L |        |
| 2928 | 12 | 12p11.1              | 33270870  | 33950285  | 679416 | 46.98 | Y | C |        |
| 2929 | 12 | 12p11.1              | 34468373  | 34640621  | 172249 | 7.32  | Y | L |        |
| 2930 | 12 | 12q11-<br>12q12      | 36299877  | 36723578  | 423702 | 4.25  | Y | C |        |
| 2931 | 12 | 12q12                | 37129708  | 37181775  | 52068  | 0.50  | Y | L |        |
| 2932 | 12 | 12q12                | 37649999  | 37658278  | 8280   | 0.28  | N | L |        |
| 2933 | 12 | 12q12                | 38510570  | 38530268  | 19699  | 0.08  | N | L | 611036 |
| 2934 | 12 | 12q12                | 39023382  | 39061296  | 37915  | 0.17  | N | L | 609007 |
| 2935 | 12 | 12q12                | 39193354  | 39231465  | 38112  | 0.25  | Y | L | 609007 |
| 2936 | 12 | 12q12                | 39553796  | 39574058  | 20263  | 0.14  | N | L | 612540 |
| 2937 | 12 | 12q12                | 39606377  | 39625611  | 19235  | 0.17  | N | L | 612540 |
| 2938 | 12 | 12q12                | 39787269  | 39818400  | 31132  | 1.26  | Y | L |        |
| 2939 | 12 | 12q12                | 39843300  | 39866444  | 23145  | 0.06  | N | L |        |
| 2940 | 12 | 12q12                | 39878881  | 39914769  | 35889  | 0.28  | N | L |        |
| 2941 | 12 | 12q12                | 40029010  | 40039510  | 10501  | 0.08  | N | L |        |
| 2942 | 12 | 12q12                | 40115413  | 40126477  | 11065  | 0.20  | Y | L | 609730 |
| 2943 | 12 | 12q12                | 40173459  | 40205877  | 32419  | 0.31  | Y | L | 609730 |
| 2944 | 12 | 12q12                | 41179399  | 41194645  | 15247  | 0.06  | N | G | 612437 |
| 2945 | 12 | 12q12                | 41601468  | 41620075  | 18608  | 0.11  | N | L |        |

Parkinson disease-  
8, 607060 (3)

|      |    |          |          |          |        |      |   |   |        |
|------|----|----------|----------|----------|--------|------|---|---|--------|
| 2946 | 12 | 12q12    | 41717927 | 41830727 | 112801 | 3.07 | N | L |        |
| 2947 | 12 | 12q12    | 42216868 | 42226823 | 9956   | 0.25 | N | L | 611681 |
| 2948 | 12 | 12q12    | 42888413 | 42929058 | 40646  | 0.17 | N | L |        |
| 2949 | 12 | 12q12    | 43016129 | 43074511 | 58383  | 1.12 | N | L |        |
| 2950 | 12 | 12q12    | 43285940 | 43295912 | 9973   | 0.11 | N | L | 602320 |
| 2951 | 12 | 12q13.11 | 44823390 | 44857581 | 34192  | 0.08 | N | L |        |
| 2952 | 12 | 12q13.11 | 45455346 | 45492793 | 37448  | 0.17 | Y | L | 608065 |
| 2953 | 12 | 12q13.11 | 45703169 | 45749692 | 46524  | 0.31 | N | C |        |
| 2954 | 12 | 12q13.11 | 46010425 | 46025115 | 14691  | 0.06 | Y | G |        |
| 2955 | 12 | 12q13.11 | 46958573 | 46990759 | 32187  | 0.56 | Y | L |        |
| 2956 | 12 | 12q13.11 | 47173860 | 47213808 | 39949  | 0.06 | N | G |        |
| 2957 | 12 | 12q13.13 | 50453272 | 50468719 | 15448  | 0.08 | N | L | 600702 |
| 2958 | 12 | 12q13.13 | 51132357 | 51153187 | 20831  | 0.14 | Y | L | 612315 |
| 2959 | 12 | 12q13.2  | 54233899 | 54260896 | 26998  | 0.28 | Y | L |        |
| 2960 | 12 | 12q13.2  | 54297828 | 54308687 | 10860  | 0.06 | N | L |        |
| 2961 | 12 | 12q14.1  | 57170489 | 57215923 | 45435  | 0.25 | N | L |        |
| 2962 | 12 | 12q14.1  | 57378034 | 57457477 | 79444  | 0.17 | Y | L |        |
| 2963 | 12 | 12q14.1  | 58038750 | 58104009 | 65260  | 1.57 | N | L |        |
| 2964 | 12 | 12q14.1  | 58583969 | 58620376 | 36408  | 0.64 | Y | L |        |
| 2965 | 12 | 12q14.1  | 58683532 | 58704260 | 20729  | 0.11 | Y | L |        |
| 2966 | 12 | 12q14.1  | 58971430 | 58987839 | 16410  | 0.08 | N | L |        |
| 2967 | 12 | 12q14.1  | 59001144 | 59028872 | 27729  | 0.59 | N | L |        |
| 2968 | 12 | 12q14.1  | 59149421 | 59316177 | 166757 | 0.42 | Y | L |        |
| 2969 | 12 | 12q14.1  | 59370573 | 59540127 | 169555 | 1.23 | Y | L |        |
| 2970 | 12 | 12q14.1  | 59719977 | 59736221 | 16245  | 0.08 | N | L |        |
| 2971 | 12 | 12q14.1  | 60073924 | 60082655 | 8732   | 0.08 | Y | L |        |
| 2972 | 12 | 12q14.1  | 60400759 | 60468658 | 67900  | 2.43 | N | L |        |
| 2973 | 12 | 12q14.1  | 60511078 | 60527947 | 16870  | 0.08 | N | L |        |
| 2974 | 12 | 12q14.2  | 62265835 | 62360461 | 94627  | 0.06 | Y | L |        |
| 2975 | 12 | 12q14.3  | 64304740 | 64321154 | 16415  | 0.06 | N | L |        |
| 2976 | 12 | 12q14.3  | 64744302 | 64768647 | 24346  | 1.03 | N | L |        |
| 2977 | 12 | 12q14.3  | 65526302 | 65548112 | 21811  | 0.20 | N | L |        |
| 2978 | 12 | 12q14.3  | 65850822 | 65916053 | 65232  | 0.25 | N | L |        |
| 2979 | 12 | 12q15    | 66247625 | 66301640 | 54016  | 0.08 | N | L |        |
| 2980 | 12 | 12q15    | 66417943 | 66463826 | 45884  | 0.11 | N | L |        |
| 2981 | 12 | 12q15    | 66934196 | 66942914 | 8719   | 0.08 | N | L |        |
| 2982 | 12 | 12q15    | 69633685 | 69644403 | 10719  | 0.11 | Y | L |        |
| 2983 | 12 | 12q21.1  | 69874042 | 69920245 | 46204  | 0.78 | Y | L |        |
| 2984 | 12 | 12q21.1  | 70034230 | 70095777 | 61548  | 7.04 | N | L |        |
| 2985 | 12 | 12q21.1  | 70895635 | 70908347 | 12713  | 0.08 | Y | L |        |
| 2986 | 12 | 12q21.1  | 71017459 | 71041208 | 23750  | 0.34 | Y | L | 606950 |
| 2987 | 12 | 12q21.1  | 71249580 | 71266915 | 17336  | 0.45 | Y | L | 606950 |
| 2988 | 12 | 12q21.1  | 71341346 | 71368737 | 27392  | 1.12 | Y | L | 606950 |
| 2989 | 12 | 12q21.1  | 71627214 | 71730857 | 103644 | 0.50 | Y | L |        |
| 2990 | 12 | 12q21.1  | 72727127 | 72752414 | 25288  | 0.06 | N | L |        |
| 2991 | 12 | 12q21.1  | 73018291 | 73057373 | 39083  | 0.56 | N | L |        |
| 2992 | 12 | 12q21.1  | 73146510 | 73161396 | 14887  | 0.06 | Y | L |        |
| 2993 | 12 | 12q21.1  | 73297842 | 73309998 | 12157  | 0.08 | N | L |        |
| 2994 | 12 | 12q21.1  | 73441580 | 73454813 | 13234  | 0.11 | Y | L |        |
| 2995 | 12 | 12q21.1  | 73613824 | 73649918 | 36095  | 0.50 | N | L |        |
| 2996 | 12 | 12q21.1  | 73790896 | 73802628 | 11733  | 0.11 | N | L | 176256 |
| 2997 | 12 | 12q21.1  | 74082988 | 74096811 | 13824  | 0.14 | N | L | 610394 |
| 2998 | 12 | 12q21.2  | 74221195 | 74259224 | 38030  | 0.39 | N | L |        |
| 2999 | 12 | 12q21.2  | 76110787 | 76128112 | 17326  | 0.06 | N | L |        |
| 3000 | 12 | 12q21.2  | 76847522 | 76864828 | 17307  | 0.06 | N | L | 611629 |
| 3001 | 12 | 12q21.2  | 77028978 | 77042099 | 13122  | 0.06 | Y | L | 611629 |
| 3002 | 12 | 12q21.2  | 77070387 | 77122382 | 51996  | 0.36 | N | L | 611629 |
| 3003 | 12 | 12q21.2  | 77430879 | 77501621 | 70743  | 1.40 | N | L |        |
| 3004 | 12 | 12q21.2  | 77668460 | 77684472 | 16013  | 0.08 | N | L |        |
| 3005 | 12 | 12q21.2  | 77785045 | 77814879 | 29835  | 0.39 | N | L |        |
| 3006 | 12 | 12q21.2  | 78074072 | 78106382 | 32311  | 0.39 | N | L |        |
| 3007 | 12 | 12q21.2  | 78301975 | 78329327 | 27353  | 0.08 | N | L | 185605 |
| 3008 | 12 | 12q21.31 | 79403271 | 79420143 | 16873  | 0.06 | N | L |        |
| 3009 | 12 | 12q21.31 | 79915279 | 79937687 | 22409  | 0.11 | N | L |        |
| 3010 | 12 | 12q21.31 | 80020066 | 80035426 | 15361  | 0.06 | N | L |        |
| 3011 | 12 | 12q21.31 | 80258291 | 80291593 | 33303  | 0.08 | N | L | 603143 |
| 3012 | 12 | 12q21.31 | 80490198 | 80502512 | 12315  | 0.08 | Y | L | 603143 |
| 3013 | 12 | 12q21.31 | 80588517 | 80614419 | 25903  | 0.36 | N | L | 603143 |
| 3014 | 12 | 12q21.31 | 80627617 | 80665381 | 37765  | 0.53 | Y | L | 603143 |
| 3015 | 12 | 12q21.31 | 80697382 | 80703051 | 5670   | 0.06 | N | L |        |
| 3016 | 12 | 12q21.31 | 80896776 | 80923788 | 27013  | 0.28 | N | L |        |
| 3017 | 12 | 12q21.31 | 80970103 | 80982456 | 12354  | 0.39 | N | L |        |
| 3018 | 12 | 12q21.31 | 81484986 | 81491520 | 6535   | 0.06 | Y | G |        |
| 3019 | 12 | 12q21.31 | 81510765 | 81524594 | 13830  | 0.06 | N | L |        |

|      |    |                    |           |           |        |      |   |   |        |
|------|----|--------------------|-----------|-----------|--------|------|---|---|--------|
| 3020 | 12 | 12q21.31           | 82140592  | 82156786  | 16195  | 0.25 | Y | C |        |
| 3021 | 12 | 12q21.31           | 82244729  | 82288920  | 44192  | 2.12 | N | L |        |
| 3022 | 12 | 12q21.31           | 82367609  | 82457385  | 89777  | 1.17 | N | L |        |
| 3023 | 12 | 12q21.31           | 82574903  | 82586860  | 11958  | 0.11 | N | L |        |
| 3024 | 12 | 12q21.31           | 82981881  | 83010923  | 29043  | 0.17 | N | L |        |
| 3025 | 12 | 12q21.31           | 83057846  | 83216936  | 159091 | 0.25 | Y | L |        |
| 3026 | 12 | 12q21.31           | 83381106  | 83444260  | 63155  | 1.54 | N | C |        |
| 3027 | 12 | 12q21.31           | 83497918  | 83512836  | 14919  | 0.28 | Y | L |        |
| 3028 | 12 | 12q21.31           | 83608523  | 83638546  | 30024  | 0.06 | Y | L |        |
| 3029 | 12 | 12q21.31           | 84057089  | 84075506  | 18418  | 0.31 | N | L |        |
| 3030 | 12 | 12q21.31           | 84260109  | 84273547  | 13439  | 0.42 | N | L |        |
| 3031 | 12 | 12q21.31           | 84453308  | 84492448  | 39141  | 0.17 | Y | L |        |
| 3032 | 12 | 12q21.31           | 84529415  | 84562461  | 33047  | 0.11 | Y | L |        |
| 3033 | 12 | 12q21.31           | 84665370  | 84686527  | 21158  | 0.06 | N | L |        |
| 3034 | 12 | 12q21.31           | 85015262  | 85029776  | 14515  | 0.08 | N | L | 607385 |
| 3035 | 12 | 12q21.32           | 85215815  | 85251896  | 36082  | 0.06 | Y | L | 607385 |
| 3036 | 12 | 12q21.32           | 85647937  | 85669705  | 21769  | 0.11 | N | L | 607385 |
| 3037 | 12 | 12q21.32           | 85723445  | 85769481  | 46037  | 0.11 | Y | L | 607385 |
| 3038 | 12 | 12q21.32           | 85952123  | 86014372  | 62250  | 0.50 | N | L |        |
| 3039 | 12 | 12q21.32           | 86192156  | 86238649  | 46494  | 0.08 | N | L |        |
| 3040 | 12 | 12q21.32           | 86456288  | 86538657  | 82370  | 3.13 | N | L |        |
| 3041 | 12 | 12q21.32           | 86716029  | 86758735  | 42707  | 0.36 | N | L |        |
| 3042 | 12 | 12q21.32           | 86781413  | 86818926  | 37514  | 0.45 | N | L |        |
| 3043 | 12 | 12q21.32           | 86871244  | 86894216  | 22973  | 0.11 | N | L |        |
| 3044 | 12 | 12q21.33           | 87716619  | 87751872  | 35254  | 0.06 | N | L |        |
| 3045 | 12 | 12q21.33           | 87783191  | 87795171  | 11981  | 0.06 | N | L |        |
| 3046 | 12 | 12q21.33           | 87838137  | 87869362  | 31226  | 0.89 | N | L |        |
| 3047 | 12 | 12q21.33           | 88916021  | 88926436  | 10416  | 0.06 | N | L |        |
| 3048 | 12 | 12q21.33           | 89085394  | 89124106  | 38713  | 0.20 | N | L |        |
| 3049 | 12 | 12q21.33           | 89217396  | 89268667  | 51272  | 0.20 | N | L |        |
| 3050 | 12 | 12q21.33           | 89334048  | 89384991  | 50944  | 1.34 | N | L |        |
| 3051 | 12 | 12q21.33           | 89809752  | 89857211  | 47460  | 0.89 | N | L |        |
| 3052 | 12 | 12q21.33           | 89890728  | 89985553  | 107826 | 1.29 | N | L | 601657 |
| 3053 | 12 | 12q21.33           | 90141352  | 90174957  | 33606  | 0.06 | Y | L |        |
| 3054 | 12 | 12q21.33           | 90254765  | 90276149  | 21385  | 0.08 | N | L |        |
| 3055 | 12 | 12q21.33           | 90640909  | 90661994  | 21086  | 0.11 | N | L |        |
| 3056 | 12 | 12q21.33           | 90847602  | 90863765  | 16164  | 0.08 | N | L |        |
| 3057 | 12 | 12q22              | 91388499  | 91411247  | 22749  | 0.06 | N | L |        |
| 3058 | 12 | 12q22              | 92843359  | 92871282  | 27924  | 0.08 | Y | L |        |
| 3059 | 12 | 12q22              | 93453691  | 93466441  | 12751  | 0.08 | N | L |        |
| 3060 | 12 | 12q22              | 94446991  | 94458016  | 11026  | 0.08 | N | L | 610993 |
| 3061 | 12 | 12q23.1            | 96401542  | 96408817  | 7276   | 0.06 | Y | L | 607045 |
| 3062 | 12 | 12q23.1            | 96959772  | 97022756  | 62985  | 1.01 | N | L |        |
| 3063 | 12 | 12q23.1            | 98258890  | 98278102  | 19213  | 0.28 | N | L | 607815 |
| 3064 | 12 | 12q23.1            | 99732017  | 99759777  | 27761  | 0.36 | N | L | 610111 |
| 3065 | 12 | 12q23.2            | 101117447 | 101185122 | 67676  | 0.11 | N | L |        |
| 3066 | 12 | 12q23.3            | 103978227 | 103992620 | 14394  | 0.48 | N | L |        |
| 3067 | 12 | 12q23.3            | 104870494 | 104874386 | 3893   | 0.06 | N | L |        |
| 3068 | 12 | 12q23.3            | 105186483 | 105219496 | 33014  | 0.31 | N | L |        |
| 3069 | 12 | 12q24.21           | 113037681 | 113100588 | 62908  | 1.90 | N | L |        |
| 3070 | 12 | 12q24.21           | 114023583 | 114033533 | 9951   | 0.17 | Y | G |        |
| 3071 | 12 | 12q24.22           | 116297635 | 116303885 | 6251   | 0.11 | Y | C |        |
| 3072 | 12 | 12q24.23           | 117726745 | 117767683 | 40939  | 0.14 | Y | L |        |
| 3073 | 12 | 12q24.23           | 117813170 | 117819507 | 6338   | 0.06 | N | L |        |
| 3074 | 12 | 12q24.32           | 124585269 | 124595708 | 10440  | 0.28 | N | L |        |
| 3075 | 12 | 12q24.33           | 130370891 | 130391708 | 20818  | 1.57 | Y | C |        |
| 3076 | 12 | 12q24.33           | 130476387 | 130498920 | 22534  | 0.25 | Y | C |        |
| 3077 | 12 | 12q24.33           | 130638019 | 130664006 | 25988  | 0.06 | Y | L |        |
| 3078 | 12 | 12q24.33           | 130680896 | 130708423 | 27528  | 6.82 | Y | L |        |
| 3079 | 13 | 13q11-<br>13q12.11 | 18205316  | 18557165  | 351850 | 1.84 | Y | C |        |
| 3080 | 13 | 13q12.11           | 21858610  | 21866229  | 7620   | 0.06 | Y | L |        |
| 3081 | 13 | 13q12.11           | 22021682  | 22063649  | 41968  | 4.33 | Y | L |        |
| 3082 | 13 | 13q12.12           | 23991650  | 24028505  | 36856  | 0.25 | Y | L |        |
| 3083 | 13 | 13q12.2            | 27147515  | 27158078  | 10564  | 0.06 | N | L |        |
| 3084 | 13 | 13q12.3            | 29517171  | 29544581  | 27411  | 0.25 | N | L |        |
| 3085 | 13 | 13q12.3            | 30977080  | 31006561  | 29482  | 0.08 | N | L |        |
| 3086 | 13 | 13q13.1            | 31429152  | 31444338  | 15187  | 0.11 | Y | L |        |
| 3087 | 13 | 13q13.2            | 32980834  | 32998191  | 17358  | 0.11 | Y | L |        |
| 3088 | 13 | 13q13.2            | 33387645  | 33412707  | 25063  | 0.75 | N | L |        |
| 3089 | 13 | 13q13.2            | 34634170  | 34696469  | 62300  | 0.22 | N | L | 604889 |
| 3090 | 13 | 13q13.3            | 34835455  | 34847171  | 11717  | 0.06 | N | L | 604889 |
| 3091 | 13 | 13q13.3            | 36044599  | 36059497  | 14899  | 0.14 | N | L |        |
| 3092 | 13 | 13q13.3            | 37212438  | 37261626  | 49189  | 3.13 | Y | C | 603651 |

|      |    |          |          |          |        |      |   |   |        |
|------|----|----------|----------|----------|--------|------|---|---|--------|
| 3093 | 13 | 13q14.11 | 39935905 | 39942340 | 6436   | 0.08 | N | L |        |
| 3094 | 13 | 13q14.11 | 40818276 | 40841268 | 22993  | 0.22 | N | L |        |
| 3095 | 13 | 13q14.11 | 42375288 | 42643534 | 268247 | 0.06 | Y | G | 607441 |
| 3096 | 13 | 13q14.11 | 42974924 | 43001342 | 26419  | 0.28 | N | L | 610914 |
| 3097 | 13 | 13q14.12 | 45732707 | 45846549 | 113843 | 0.06 | N | L |        |
| 3098 | 13 | 13q14.13 | 46130501 | 46163243 | 32743  | 1.34 | N | L | 610368 |
| 3099 | 13 | 13q14.2  | 46471174 | 46538811 | 67638  | 2.21 | N | L |        |
| 3100 | 13 | 13q14.2  | 46868076 | 46894461 | 26386  | 0.08 | N | L |        |
| 3101 | 13 | 13q14.2  | 47093370 | 47149552 | 56183  | 0.50 | N | L |        |
| 3102 | 13 | 13q14.3  | 50273212 | 50294018 | 20807  | 0.08 | N | L |        |
| 3103 | 13 | 13q21.1  | 52830219 | 52862665 | 32447  | 1.65 | N | L |        |
| 3104 | 13 | 13q21.1  | 53153504 | 53202090 | 48587  | 0.64 | N | L |        |
| 3105 | 13 | 13q21.1  | 54662257 | 54690521 | 28265  | 0.06 | N | L |        |
| 3106 | 13 | 13q21.1  | 54730139 | 54742664 | 12526  | 0.08 | N | L |        |
| 3107 | 13 | 13q21.1  | 54822278 | 54841949 | 19672  | 0.06 | N | L |        |
| 3108 | 13 | 13q21.1  | 54982751 | 55013310 | 30560  | 0.20 | N | L |        |
| 3109 | 13 | 13q21.1  | 55173808 | 55234854 | 61047  | 7.57 | N | L |        |
| 3110 | 13 | 13q21.1  | 55668814 | 55723219 | 54406  | 0.53 | Y | L |        |
| 3111 | 13 | 13q21.1  | 55781439 | 55822833 | 41395  | 0.25 | Y | L |        |
| 3112 | 13 | 13q21.1  | 55999241 | 56024705 | 25465  | 0.06 | Y | L |        |
| 3113 | 13 | 13q21.1  | 56080643 | 56272180 | 191538 | 0.87 | Y | L |        |
| 3114 | 13 | 13q21.1  | 56409747 | 56433423 | 23677  | 0.34 | N | L |        |
| 3115 | 13 | 13q21.1  | 56534058 | 56601020 | 66963  | 0.39 | Y | L |        |
| 3116 | 13 | 13q21.1  | 56611413 | 56861712 | 250300 | 8.24 | Y | L |        |
| 3117 | 13 | 13q21.1  | 56979282 | 57006356 | 27075  | 0.14 | N | L |        |
| 3118 | 13 | 13q21.1  | 57147284 | 57186503 | 39220  | 0.06 | N | L | 611760 |
| 3119 | 13 | 13q21.1  | 57326450 | 57364018 | 37569  | 0.11 | N | L |        |
| 3120 | 13 | 13q21.1  | 57405881 | 57430951 | 25071  | 0.11 | N | L |        |
| 3121 | 13 | 13q21.1  | 57481311 | 57495031 | 13721  | 0.34 | Y | L |        |
| 3122 | 13 | 13q21.2  | 57612378 | 57666366 | 53989  | 0.59 | Y | L |        |
| 3123 | 13 | 13q21.2  | 57884728 | 57902596 | 17869  | 0.06 | N | L |        |
| 3124 | 13 | 13q21.2  | 58027318 | 58062547 | 35230  | 0.14 | N | L |        |
| 3125 | 13 | 13q21.31 | 60518697 | 60550875 | 32179  | 0.08 | N | L |        |
| 3126 | 13 | 13q21.31 | 61299632 | 61337239 | 37608  | 0.25 | N | L |        |
| 3127 | 13 | 13q21.31 | 61952495 | 61998622 | 46128  | 0.73 | N | L |        |
| 3128 | 13 | 13q21.31 | 62178094 | 62194042 | 15949  | 0.06 | Y | L |        |
| 3129 | 13 | 13q21.31 | 62216874 | 62527158 | 310285 | 0.89 | Y | L |        |
| 3130 | 13 | 13q21.31 | 62605194 | 62815645 | 210452 | 0.11 | Y | L |        |
| 3131 | 13 | 13q21.31 | 63311147 | 63315975 | 4829   | 0.06 | N | C |        |
| 3132 | 13 | 13q21.31 | 63510854 | 63531431 | 20578  | 0.11 | Y | L |        |
| 3133 | 13 | 13q21.31 | 63621139 | 63733597 | 112459 | 0.39 | Y | L |        |
| 3134 | 13 | 13q21.31 | 63904913 | 63922915 | 18003  | 0.11 | N | L |        |
| 3135 | 13 | 13q21.32 | 64207009 | 64283635 | 76627  | 0.92 | Y | L |        |
| 3136 | 13 | 13q21.32 | 64405252 | 64457435 | 52184  | 0.08 | Y | L |        |
| 3137 | 13 | 13q21.32 | 64467750 | 64493163 | 25414  | 0.06 | Y | L |        |
| 3138 | 13 | 13q21.32 | 64551201 | 64617808 | 66608  | 0.06 | Y | L |        |
| 3139 | 13 | 13q21.32 | 65085269 | 65128868 | 43600  | 0.11 | Y | L |        |
| 3140 | 13 | 13q21.32 | 65502212 | 65537617 | 35406  | 0.08 | N | L |        |
| 3141 | 13 | 13q21.32 | 65576296 | 65578947 | 2652   | 0.11 | N | L |        |
| 3142 | 13 | 13q21.32 | 65912427 | 65931571 | 19145  | 0.06 | Y | L | 603581 |
| 3143 | 13 | 13q21.32 | 65992315 | 66010490 | 18176  | 0.39 | Y | L | 603581 |
| 3144 | 13 | 13q21.32 | 66457817 | 66487938 | 30122  | 0.06 | N | L | 603581 |
| 3145 | 13 | 13q21.32 | 67023621 | 67051182 | 27562  | 2.15 | N | L |        |
| 3146 | 13 | 13q21.33 | 67422166 | 67446718 | 24553  | 0.08 | N | L |        |
| 3147 | 13 | 13q21.33 | 67970497 | 68097597 | 127101 | 0.06 | Y | L |        |
| 3148 | 13 | 13q21.33 | 68151581 | 68166243 | 14663  | 0.11 | Y | L |        |
| 3149 | 13 | 13q21.33 | 68414286 | 68442629 | 28344  | 0.11 | N | L |        |
| 3150 | 13 | 13q21.33 | 68463117 | 68480313 | 17197  | 0.22 | Y | L |        |
| 3151 | 13 | 13q21.33 | 68558052 | 68574685 | 16634  | 0.08 | N | L |        |
| 3152 | 13 | 13q21.33 | 68715312 | 68777946 | 62635  | 0.53 | N | L |        |
| 3153 | 13 | 13q21.33 | 69295385 | 69336745 | 41361  | 0.75 | Y | L | 605332 |
| 3154 | 13 | 13q21.33 | 69469515 | 69487040 | 17526  | 0.08 | N | L | 605332 |
| 3155 | 13 | 13q21.33 | 69653854 | 69665965 | 12112  | 0.56 | Y | L |        |
| 3156 | 13 | 13q21.33 | 69797760 | 69836633 | 38874  | 1.29 | N | L |        |
| 3157 | 13 | 13q21.33 | 69888741 | 69920782 | 32042  | 0.11 | N | L |        |
| 3158 | 13 | 13q21.33 | 70353148 | 70375358 | 22211  | 0.08 | Y | L |        |
| 3159 | 13 | 13q21.33 | 70780326 | 70832797 | 52472  | 0.36 | N | L |        |
| 3160 | 13 | 13q21.33 | 71321829 | 71329368 | 7540   | 0.08 | Y | L | 603803 |
| 3161 | 13 | 13q21.33 | 71555068 | 71571034 | 15967  | 0.08 | N | L |        |
| 3162 | 13 | 13q21.33 | 71759217 | 71789989 | 30773  | 0.56 | N | L |        |
| 3163 | 13 | 13q22.1  | 73920255 | 73963484 | 43230  | 0.34 | N | L |        |
| 3164 | 13 | 13q22.2  | 74467066 | 74632811 | 165746 | 2.52 | N | L |        |
| 3165 | 13 | 13q22.2  | 74799638 | 74814381 | 14744  | 0.06 | N | L | 612465 |
| 3166 | 13 | 13q22.2  | 75374672 | 75421210 | 46539  | 0.48 | Y | L |        |

|      |    |                     |           |           |        |      |   |   |        |
|------|----|---------------------|-----------|-----------|--------|------|---|---|--------|
| 3167 | 13 | 13q22.2             | 75502319  | 75523171  | 20853  | 0.28 | Y | L |        |
| 3168 | 13 | 13q22.2             | 75963182  | 75974751  | 11570  | 1.68 | N | G |        |
| 3169 | 13 | 13q22.3             | 76559529  | 76574013  | 14485  | 0.06 | Y | L | 610392 |
| 3170 | 13 | 13q22.3             | 77026611  | 77043269  | 16659  | 0.20 | N | L | 604112 |
| 3171 | 13 | 13q22.3             | 77197399  | 77224296  | 26898  | 0.31 | N | L | 610491 |
| 3172 | 13 | 13q22.3             | 77361850  | 77381064  | 19215  | 0.34 | N | L | 600501 |
| 3173 | 13 | 13q22.3             | 77544243  | 77557381  | 13139  | 1.01 | N | L |        |
| 3174 | 13 | 13q22.3             | 77648301  | 77666942  | 18642  | 0.06 | N | L |        |
| 3175 | 13 | 13q22.3             | 77676898  | 77695010  | 18113  | 0.06 | N | L |        |
| 3176 | 13 | 13q22.3-<br>13q31.1 | 77711551  | 77802306  | 90756  | 0.81 | Y | L |        |
| 3177 | 13 | 13q31.1             | 77847205  | 77857549  | 10345  | 0.17 | N | L |        |
| 3178 | 13 | 13q31.1             | 78209977  | 78223739  | 13763  | 0.06 | N | L |        |
| 3179 | 13 | 13q31.1             | 78456886  | 78493542  | 36657  | 0.56 | N | L |        |
| 3180 | 13 | 13q31.1             | 79385392  | 79397716  | 12325  | 0.08 | Y | C |        |
| 3181 | 13 | 13q31.1             | 79494756  | 79528266  | 33511  | 0.50 | N | L |        |
| 3182 | 13 | 13q31.1             | 79785259  | 79815528  | 30270  | 0.06 | N | L | 602466 |
| 3183 | 13 | 13q31.1             | 80205567  | 80226119  | 20553  | 0.08 | Y | L |        |
| 3184 | 13 | 13q31.1             | 80891072  | 80919973  | 28902  | 0.34 | N | L |        |
| 3185 | 13 | 13q31.1             | 80973593  | 80980703  | 7111   | 0.08 | N | L |        |
| 3186 | 13 | 13q31.1             | 81109554  | 81130086  | 20533  | 0.06 | N | L |        |
| 3187 | 13 | 13q31.1             | 81395388  | 81479443  | 84056  | 0.11 | N | L |        |
| 3188 | 13 | 13q31.1             | 81797707  | 81808486  | 10780  | 0.06 | N | L |        |
| 3189 | 13 | 13q31.1             | 81921639  | 81975582  | 53944  | 2.54 | N | L |        |
| 3190 | 13 | 13q31.1             | 82001296  | 82017406  | 16111  | 0.06 | Y | L |        |
| 3191 | 13 | 13q31.1             | 82042242  | 82088009  | 45768  | 7.55 | Y | L |        |
| 3192 | 13 | 13q31.1             | 82569799  | 82595928  | 26130  | 0.48 | Y | L |        |
| 3193 | 13 | 13q31.1             | 82684518  | 82723007  | 38490  | 2.52 | Y | L |        |
| 3194 | 13 | 13q31.1             | 83004034  | 83054006  | 49973  | 0.61 | Y | L |        |
| 3195 | 13 | 13q31.1             | 83391208  | 83460784  | 69577  | 0.06 | N | L |        |
| 3196 | 13 | 13q31.1             | 83523944  | 83704525  | 180582 | 0.31 | N | L |        |
| 3197 | 13 | 13q31.1             | 84157060  | 84197208  | 40149  | 0.06 | N | L |        |
| 3198 | 13 | 13q31.1             | 84346274  | 84376047  | 29774  | 0.06 | N | L |        |
| 3199 | 13 | 13q31.1             | 84441104  | 84456951  | 15848  | 0.31 | Y | L |        |
| 3200 | 13 | 13q31.1             | 84463907  | 84481384  | 17478  | 0.06 | Y | L |        |
| 3201 | 13 | 13q31.1             | 84702349  | 84714710  | 12362  | 0.11 | Y | L |        |
| 3202 | 13 | 13q31.1             | 84786098  | 84813360  | 27263  | 0.06 | Y | L |        |
| 3203 | 13 | 13q31.1             | 85220557  | 85235113  | 14557  | 0.11 | N | L |        |
| 3204 | 13 | 13q31.1             | 85241588  | 85243868  | 2281   | 0.20 | N | L |        |
| 3205 | 13 | 13q31.1             | 85245812  | 85267121  | 21310  | 0.06 | N | L | 609681 |
| 3206 | 13 | 13q31.1             | 86107564  | 86151637  | 44074  | 0.06 | N | L |        |
| 3207 | 13 | 13q31.2             | 86882517  | 86919011  | 36495  | 0.17 | N | L |        |
| 3208 | 13 | 13q31.2             | 86946846  | 86973445  | 26600  | 0.11 | Y | L |        |
| 3209 | 13 | 13q31.2             | 87528906  | 87538716  | 9811   | 0.14 | N | L |        |
| 3210 | 13 | 13q31.2             | 87543821  | 87568741  | 24921  | 0.06 | N | L |        |
| 3211 | 13 | 13q31.2             | 87695097  | 87720861  | 25765  | 0.06 | N | L |        |
| 3212 | 13 | 13q31.2             | 87840749  | 87861401  | 20653  | 0.11 | N | L |        |
| 3213 | 13 | 13q31.2             | 88218588  | 88259363  | 40776  | 0.31 | Y | L |        |
| 3214 | 13 | 13q31.2             | 88592238  | 88649415  | 57178  | 0.67 | Y | L |        |
| 3215 | 13 | 13q31.3             | 89239100  | 89256734  | 17635  | 0.08 | Y | L |        |
| 3216 | 13 | 13q31.3             | 89265094  | 89343656  | 78563  | 0.08 | Y | L |        |
| 3217 | 13 | 13q31.3             | 89491459  | 89493526  | 2068   | 0.08 | Y | L |        |
| 3218 | 13 | 13q31.3             | 89949096  | 89960670  | 11575  | 0.17 | N | L |        |
| 3219 | 13 | 13q31.3             | 90906701  | 90925132  | 18432  | 0.08 | N | L | 602446 |
| 3220 | 13 | 13q31.3             | 92878095  | 92898105  | 20011  | 0.06 | N | L | 604404 |
| 3221 | 13 | 13q31.3             | 93119014  | 93346295  | 227282 | 3.21 | Y | L | 604404 |
| 3222 | 13 | 13q31.3             | 93485629  | 93497436  | 11808  | 0.06 | N | L | 604404 |
| 3223 | 13 | 13q31.3             | 93563813  | 93583357  | 19545  | 0.08 | N | L | 604404 |
| 3224 | 13 | 13q32.1             | 94349071  | 94357617  | 8547   | 0.06 | N | L |        |
| 3225 | 13 | 13q32.1             | 94750079  | 94769017  | 18939  | 0.22 | Y | L | 605250 |
| 3226 | 13 | 13q32.1             | 94798750  | 94826575  | 27826  | 0.06 | Y | L |        |
| 3227 | 13 | 13q32.1             | 96096938  | 96138001  | 41064  | 0.31 | N | L | 609401 |
| 3228 | 13 | 13q32.3             | 98120753  | 98141892  | 21140  | 0.06 | N | L | 600544 |
| 3229 | 13 | 13q33.1             | 101289736 | 101333866 | 44131  | 0.92 | N | L | 609307 |
| 3230 | 13 | 13q33.1             | 101557957 | 101565652 | 7696   | 0.06 | Y | L | 609307 |
| 3231 | 13 | 13q33.1             | 102864267 | 102877303 | 13037  | 0.08 | N | L |        |
| 3232 | 13 | 13q33.1             | 102976509 | 103007730 | 31222  | 0.70 | N | L |        |
| 3233 | 13 | 13q33.1             | 103073528 | 103077233 | 3706   | 0.31 | Y | L |        |
| 3234 | 13 | 13q33.1             | 103182364 | 103226195 | 43832  | 3.41 | Y | L |        |
| 3235 | 13 | 13q33.1             | 103472359 | 103498446 | 26088  | 0.06 | N | L |        |
| 3236 | 13 | 13q33.1             | 103568668 | 103639505 | 70838  | 1.09 | Y | L |        |
| 3237 | 13 | 13q33.2             | 104596983 | 104621854 | 24872  | 0.39 | N | L |        |
| 3238 | 13 | 13q33.3             | 106258973 | 106269684 | 10712  | 0.06 | Y | L |        |
| 3239 | 13 | 13q33.3             | 107403794 | 107432582 | 28789  | 0.78 | Y | L |        |

|      |    |                     |           |           |        |       |   |   |        |
|------|----|---------------------|-----------|-----------|--------|-------|---|---|--------|
| 3240 | 13 | 13q33.3             | 107473653 | 107492177 | 18525  | 1.31  | Y | L |        |
| 3241 | 13 | 13q33.3             | 108159751 | 108165646 | 5896   | 0.08  | Y | L |        |
| 3242 | 13 | 13q33.3             | 108509673 | 108526931 | 17259  | 0.06  | N | L |        |
| 3243 | 13 | 13q34               | 110097579 | 110106211 | 8633   | 0.20  | N | L | 612800 |
| 3244 | 13 | 13q34               | 111983454 | 112034589 | 51136  | 0.08  | Y | L |        |
| 3245 | 13 | 13q34               | 113194894 | 113209383 | 14490  | 0.08  | Y | L |        |
| 3246 | 14 | 14q11.1             | 18486191  | 18860467  | 374277 | 0.64  | Y | C | 608916 |
| 3247 | 14 | 14q11.1-<br>14q11.2 | 18979264  | 19493212  | 513949 | 12.47 | Y | C |        |
| 3248 | 14 | 14q11.2             | 19622192  | 19647540  | 25349  | 0.06  | Y | G |        |
| 3249 | 14 | 14q11.2             | 20422939  | 20481182  | 58244  | 0.70  | Y | C | 131398 |
| 3250 | 14 | 14q11.2             | 20898969  | 20925144  | 26176  | 0.08  | Y | L | 605012 |
| 3251 | 14 | 14q11.2             | 21390716  | 21398414  | 7699   | 0.64  | Y | L |        |
| 3252 | 14 | 14q11.2             | 21445867  | 21498204  | 52338  | 3.77  | Y | L |        |
| 3253 | 14 | 14q11.2             | 21699992  | 21706883  | 6892   | 0.14  | Y | L |        |
| 3254 | 14 | 14q11.2             | 23540325  | 23564133  | 23809  | 0.06  | Y | G |        |
| 3255 | 14 | 14q12               | 24332217  | 24342766  | 10550  | 0.06  | Y | L |        |
| 3256 | 14 | 14q12               | 24681991  | 24695156  | 13166  | 0.06  | Y | C |        |
| 3257 | 14 | 14q12               | 24898060  | 24923749  | 25690  | 0.06  | N | L |        |
| 3258 | 14 | 14q12               | 25157976  | 25187404  | 29429  | 0.75  | N | L |        |
| 3259 | 14 | 14q12               | 25238076  | 25298531  | 60456  | 0.84  | Y | L |        |
| 3260 | 14 | 14q12               | 25645356  | 25669458  | 24103  | 0.08  | Y | L |        |
| 3261 | 14 | 14q12               | 25721850  | 25735242  | 13393  | 0.06  | N | L |        |
| 3262 | 14 | 14q12               | 25833106  | 25854753  | 21648  | 0.31  | Y | L |        |
| 3263 | 14 | 14q12               | 26193254  | 26212246  | 18993  | 0.11  | N | L |        |
| 3264 | 14 | 14q12               | 26437506  | 26496897  | 59392  | 0.95  | N | L |        |
| 3265 | 14 | 14q12               | 26581081  | 26924767  | 343687 | 1.40  | Y | L |        |
| 3266 | 14 | 14q12               | 27073884  | 27109940  | 36057  | 0.06  | Y | L |        |
| 3267 | 14 | 14q12               | 27146673  | 27198434  | 51762  | 2.15  | Y | L |        |
| 3268 | 14 | 14q12               | 27431034  | 27484772  | 53739  | 1.17  | Y | L |        |
| 3269 | 14 | 14q12               | 27575946  | 27632534  | 56589  | 1.73  | Y | L |        |
| 3270 | 14 | 14q12               | 27900425  | 27920489  | 20065  | 0.06  | N | L |        |
| 3271 | 14 | 14q12               | 27936937  | 27952289  | 15353  | 0.11  | Y | L |        |
| 3272 | 14 | 14q12               | 28143878  | 28165131  | 21254  | 0.14  | Y | L |        |
| 3273 | 14 | 14q12               | 28532337  | 28560352  | 28016  | 0.08  | N | L |        |
| 3274 | 14 | 14q12               | 28918581  | 28937158  | 18578  | 0.11  | N | L |        |
| 3275 | 14 | 14q12               | 29756704  | 29810410  | 53707  | 2.24  | N | L |        |
| 3276 | 14 | 14q13.1             | 32169614  | 32211385  | 41772  | 0.48  | N | L | 604691 |
| 3277 | 14 | 14q13.1             | 32318021  | 32326948  | 8928   | 0.08  | N | L | 604691 |
| 3278 | 14 | 14q13.1             | 33016949  | 33077056  | 60108  | 3.33  | Y | L | 609430 |
| 3279 | 14 | 14q13.1             | 33786168  | 33790885  | 4718   | 0.06  | Y | L |        |
| 3280 | 14 | 14q13.1-<br>14q13.2 | 34065735  | 34111454  | 45720  | 0.17  | Y | C | 609486 |
| 3281 | 14 | 14q13.3             | 35653792  | 35666893  | 13102  | 0.08  | Y | L |        |
| 3282 | 14 | 14q13.3             | 35742437  | 35769392  | 26956  | 0.25  | Y | L |        |
| 3283 | 14 | 14q13.3             | 35877853  | 35918297  | 40445  | 0.17  | Y | L |        |
| 3284 | 14 | 14q13.3             | 36444958  | 36483905  | 38948  | 0.14  | N | L | 607571 |
| 3285 | 14 | 14q13.3             | 36556194  | 36564899  | 8706   | 0.08  | N | L | 607571 |
| 3286 | 14 | 14q21.1             | 37708670  | 37715193  | 6524   | 0.08  | N | L |        |
| 3287 | 14 | 14q21.1             | 39365857  | 39609074  | 243218 | 1.59  | Y | L |        |
| 3288 | 14 | 14q21.1             | 39784957  | 39851362  | 66406  | 0.84  | Y | L |        |
| 3289 | 14 | 14q21.1             | 39951167  | 39982980  | 31814  | 1.20  | Y | L |        |
| 3290 | 14 | 14q21.1             | 40138973  | 40153735  | 14763  | 0.08  | N | L |        |
| 3291 | 14 | 14q21.1             | 40350554  | 40372640  | 22087  | 0.11  | N | L |        |
| 3292 | 14 | 14q21.1             | 40420626  | 40441836  | 21211  | 0.08  | N | L |        |
| 3293 | 14 | 14q21.1             | 40541848  | 40573134  | 31287  | 0.42  | Y | L |        |
| 3294 | 14 | 14q21.1             | 40599160  | 40726935  | 127776 | 3.19  | Y | L |        |
| 3295 | 14 | 14q21.1             | 40781175  | 40824300  | 43126  | 0.28  | Y | L |        |
| 3296 | 14 | 14q21.1-<br>14q21.2 | 40977241  | 41019623  | 42383  | 0.06  | N | L |        |
| 3297 | 14 | 14q21.2             | 41022910  | 41042818  | 19909  | 0.17  | N | L |        |
| 3298 | 14 | 14q21.2             | 41384994  | 41391684  | 6691   | 0.06  | N | L | 612811 |
| 3299 | 14 | 14q21.2             | 41533770  | 41549002  | 15233  | 0.08  | Y | L |        |
| 3300 | 14 | 14q21.2             | 41925420  | 42028097  | 102678 | 1.45  | Y | L |        |
| 3301 | 14 | 14q21.2             | 42301574  | 42342386  | 40813  | 0.34  | N | L |        |
| 3302 | 14 | 14q21.2             | 42454130  | 42483977  | 29848  | 0.08  | N | L |        |
| 3303 | 14 | 14q21.2             | 42500278  | 42593310  | 93033  | 1.31  | N | L |        |
| 3304 | 14 | 14q21.2             | 42609462  | 42807243  | 197782 | 1.34  | Y | L |        |
| 3305 | 14 | 14q21.2             | 42968292  | 43028607  | 60316  | 2.60  | Y | L |        |
| 3306 | 14 | 14q21.3             | 43277153  | 43304722  | 27570  | 0.20  | Y | L |        |
| 3307 | 14 | 14q21.3             | 43420628  | 43450326  | 29699  | 0.08  | Y | L |        |
| 3308 | 14 | 14q21.3             | 43516734  | 43690442  | 173709 | 2.01  | Y | L |        |
| 3309 | 14 | 14q21.3             | 44094595  | 44179392  | 84798  | 0.06  | Y | L |        |
| 3310 | 14 | 14q21.3             | 45451570  | 45537581  | 86012  | 5.48  | Y | L |        |



|      |    |                     |           |           |         |       |   |   |        |
|------|----|---------------------|-----------|-----------|---------|-------|---|---|--------|
| 3311 | 14 | 14q21.3             | 45580798  | 45644559  | 63762   | 3.49  | Y | L |        |
| 3312 | 14 | 14q21.3             | 45656215  | 45700046  | 43832   | 1.29  | Y | L |        |
| 3313 | 14 | 14q21.3             | 46151357  | 46165067  | 13711   | 0.06  | Y | L |        |
| 3314 | 14 | 14q21.3             | 46786823  | 46810300  | 23478   | 0.11  | N | G | 611128 |
| 3315 | 14 | 14q21.3             | 46952105  | 46995670  | 43566   | 0.20  | N | L | 611128 |
| 3316 | 14 | 14q21.3             | 47536285  | 47704907  | 168623  | 0.20  | Y | L |        |
| 3317 | 14 | 14q21.3             | 47740921  | 47770182  | 29262   | 0.31  | Y | L |        |
| 3318 | 14 | 14q21.3             | 47825728  | 47842151  | 16424   | 0.06  | Y | L |        |
| 3319 | 14 | 14q21.3             | 47917533  | 48007982  | 90450   | 0.06  | Y | L |        |
| 3320 | 14 | 14q22.1             | 48725591  | 48766747  | 41157   | 0.95  | N | L |        |
| 3321 | 14 | 14q22.1             | 49708350  | 49733408  | 25059   | 0.06  | N | L | 601247 |
| 3322 | 14 | 14q22.1             | 52205826  | 52221158  | 15333   | 0.06  | N | L |        |
| 3323 | 14 | 14q22.2             | 53032313  | 53072204  | 39892   | 0.36  | N | L |        |
| 3324 | 14 | 14q22.2             | 53275361  | 53347739  | 72379   | 0.98  | N | L |        |
| 3325 | 14 | 14q22.2             | 53409385  | 53461658  | 52274   | 0.31  | N | L |        |
| 3326 | 14 | 14q22.2             | 53619256  | 53682549  | 63294   | 1.45  | N | L |        |
| 3327 | 14 | 14q22.3             | 55578410  | 55589686  | 11277   | 0.17  | Y | L |        |
| 3328 | 14 | 14q23.1             | 57032569  | 57045399  | 12831   | 0.06  | N | L |        |
| 3329 | 14 | 14q23.1             | 57085401  | 57098446  | 13046   | 0.06  | N | L |        |
| 3330 | 14 | 14q23.1             | 57188949  | 57242587  | 53639   | 0.11  | Y | L |        |
| 3331 | 14 | 14q23.1             | 58603322  | 58636833  | 33512   | 0.48  | N | L |        |
| 3332 | 14 | 14q23.2             | 61827612  | 61876417  | 48806   | 2.60  | N | L |        |
| 3333 | 14 | 14q23.3             | 65772609  | 65841335  | 68727   | 0.17  | N | L |        |
| 3334 | 14 | 14q23.3             | 65914761  | 65989652  | 74892   | 2.68  | N | L |        |
| 3335 | 14 | 14q24.1             | 69076258  | 69096660  | 20403   | 0.11  | Y | C |        |
| 3336 | 14 | 14q24.2             | 71406022  | 71430717  | 24696   | 0.06  | N | L |        |
| 3337 | 14 | 14q24.2             | 71877158  | 71889437  | 12280   | 2.15  | Y | L | 603894 |
| 3338 | 14 | 14q24.2             | 72125275  | 72140587  | 15313   | 0.11  | N | G |        |
| 3339 | 14 | 14q24.3             | 73075681  | 73098995  | 23315   | 22.08 | Y | G |        |
| 3340 | 14 | 14q31.1             | 78724471  | 78734800  | 10330   | 0.22  | Y | L | 600567 |
| 3341 | 14 | 14q31.1             | 78743227  | 78769140  | 25914   | 0.14  | N | L | 600567 |
| 3342 | 14 | 14q31.1             | 78979779  | 79001764  | 21986   | 0.06  | N | L | 600567 |
| 3343 | 14 | 14q31.1             | 79191977  | 79235715  | 43739   | 0.67  | N | L | 600567 |
| 3344 | 14 | 14q31.1             | 79443521  | 79482283  | 38763   | 0.08  | N | L |        |
| 3345 | 14 | 14q31.1             | 79669173  | 79700221  | 31049   | 0.34  | N | L |        |
| 3346 | 14 | 14q31.1             | 81484247  | 81573695  | 89449   | 1.62  | Y | C |        |
| 3347 | 14 | 14q31.1             | 81651062  | 81658326  | 7265    | 0.08  | N | L |        |
| 3348 | 14 | 14q31.1             | 82374086  | 82383169  | 9084    | 0.11  | N | L |        |
| 3349 | 14 | 14q31.1-<br>14q31.2 | 82599949  | 82611520  | 11572   | 0.08  | N | L |        |
| 3350 | 14 | 14q31.2             | 82915672  | 83019492  | 103821  | 3.86  | N | L |        |
| 3351 | 14 | 14q31.2             | 83086778  | 83105914  | 19137   | 0.06  | N | L |        |
| 3352 | 14 | 14q31.2             | 83227825  | 83342208  | 114384  | 1.57  | Y | L |        |
| 3353 | 14 | 14q31.2             | 83648302  | 83659567  | 11266   | 0.06  | N | L |        |
| 3354 | 14 | 14q31.3             | 84028209  | 84084634  | 56426   | 0.17  | Y | L |        |
| 3355 | 14 | 14q31.3             | 84157788  | 84210915  | 53128   | 0.08  | Y | L |        |
| 3356 | 14 | 14q31.3             | 84221050  | 84243556  | 22507   | 0.06  | Y | L |        |
| 3357 | 14 | 14q31.3             | 84293606  | 84401081  | 107476  | 0.08  | Y | L |        |
| 3358 | 14 | 14q31.3             | 84431720  | 84455187  | 23468   | 0.06  | Y | L |        |
| 3359 | 14 | 14q31.3             | 84483191  | 84539897  | 56707   | 0.14  | Y | L |        |
| 3360 | 14 | 14q31.3             | 84634908  | 84830079  | 195172  | 0.08  | Y | L |        |
| 3361 | 14 | 14q31.3             | 85481727  | 85641029  | 159303  | 1.59  | Y | L |        |
| 3362 | 14 | 14q31.3             | 85975265  | 86048063  | 72799   | 1.12  | Y | L |        |
| 3363 | 14 | 14q31.3             | 86192767  | 86252561  | 59795   | 0.98  | N | L |        |
| 3364 | 14 | 14q32.11            | 89053009  | 89103386  | 50378   | 0.06  | N | L | 602628 |
| 3365 | 14 | 14q32.11            | 89781914  | 89792226  | 10313   | 0.45  | N | L |        |
| 3366 | 14 | 14q32.12            | 91092118  | 91108133  | 16016   | 0.84  | N | G |        |
| 3367 | 14 | 14q32.12            | 92686601  | 92714375  | 27775   | 0.14  | N | L |        |
| 3368 | 14 | 14q32.13            | 93165928  | 93189634  | 23707   | 0.08  | N | L |        |
| 3369 | 14 | 14q32.2             | 97247326  | 97261795  | 14470   | 0.53  | N | L |        |
| 3370 | 14 | 14q32.31            | 100487581 | 100522768 | 35188   | 0.11  | Y | L |        |
| 3371 | 14 | 14q32.33            | 104479372 | 104489793 | 10422   | 0.67  | N | C | 608570 |
| 3372 | 14 | 14q32.33            | 105154209 | 105174078 | 19870   | 0.70  | Y | C | 147180 |
| 3373 | 14 | 14q32.33            | 105179373 | 105202028 | 22656   | 0.39  | Y | C | 147180 |
| 3374 | 14 | 14q32.33            | 105224621 | 105270347 | 45727   | 0.36  | Y | C | 147180 |
| 3375 | 14 | 14q32.33            | 105413675 | 105764171 | 350497  | 12.83 | Y | L |        |
| 3376 | 14 | 14q32.33            | 105788209 | 105907702 | 119494  | 9.64  | Y | C |        |
| 3377 | 14 | 14q32.33            | 105929904 | 106014913 | 85010   | 0.48  | Y | C |        |
| 3378 | 14 | 14q32.33            | 106198810 | 106208455 | 9646    | 0.11  | Y | L |        |
| 3379 | 14 | 14q32.33            | 106231699 | 106251269 | 19571   | 0.42  | Y | G |        |
| 3380 | 14 | 14q32.33            | 106282616 | 106353025 | 70410   | 0.06  | Y | G |        |
| 3381 | 15 | 15q11.1-<br>15q11.2 | 18310211  | 20351272  | 2041062 | 36.14 | Y | C | 608912 |
| 3382 | 15 | 15q11.2             | 20398399  | 20652801  | 254403  | 0.20  | Y | L | 608147 |

|      |    |               |          |          |        |       |   |   |        |        |                                                              |  |
|------|----|---------------|----------|----------|--------|-------|---|---|--------|--------|--------------------------------------------------------------|--|
| 3383 | 15 | 15q11.2       | 21683305 | 21688960 | 5656   | 0.06  | Y | L |        |        |                                                              |  |
| 3384 | 15 | 15q11.2       | 21943102 | 21986189 | 43088  | 0.14  | Y | L | 611217 |        |                                                              |  |
| 3385 | 15 | 15q11.2       | 22019553 | 22333172 | 313620 | 21.02 | Y | C |        |        |                                                              |  |
| 3386 | 15 | 15q11.2       | 22580329 | 22589585 | 9257   | 0.39  | Y | L |        |        |                                                              |  |
| 3387 | 15 | 15q13.1       | 26187876 | 26360354 | 172479 | 0.11  | Y | L | 605837 | 605837 | [Skin/hair/eye pigmentation 1, blond/brown hair], 227220 (3) |  |
| 3388 | 15 | 15q13.1       | 27638325 | 27651401 | 13077  | 0.11  | Y | C |        |        |                                                              |  |
| 3389 | 15 | 15q13.2       | 28192832 | 28692551 | 499720 | 0.87  | Y | C | 609756 |        |                                                              |  |
| 3390 | 15 | 15q13.2       | 28723577 | 28875254 | 151678 | 0.34  | Y | L |        |        |                                                              |  |
| 3391 | 15 | 15q13.3       | 29995432 | 30018517 | 23086  | 0.20  | Y | G |        |        |                                                              |  |
| 3392 | 15 | 15q13.3       | 30207700 | 30793800 | 586101 | 1.01  | Y | L | 118511 | 118511 | Schizophrenia, neurophysiologic defect in (2)                |  |
| 3393 | 15 | 15q13.3       | 31183071 | 31199305 | 16235  | 0.06  | Y | L |        |        |                                                              |  |
| 3394 | 15 | 15q13.3-15q14 | 31359565 | 31955408 | 595844 | 0.36  | Y | L | 180903 |        |                                                              |  |
| 3395 | 15 | 15q14         | 31985599 | 32020984 | 35386  | 0.11  | Y | L | 605265 |        |                                                              |  |
| 3396 | 15 | 15q14         | 32496931 | 32665987 | 169057 | 10.20 | Y | C | 609619 |        |                                                              |  |
| 3397 | 15 | 15q14         | 33411609 | 33454021 | 42413  | 0.06  | Y | L |        |        |                                                              |  |
| 3398 | 15 | 15q14         | 33659708 | 33723560 | 63853  | 0.20  | N | L |        |        |                                                              |  |
| 3399 | 15 | 15q14         | 34091532 | 34106229 | 14698  | 0.11  | N | L |        |        |                                                              |  |
| 3400 | 15 | 15q14         | 34780489 | 34807253 | 26765  | 0.06  | N | C |        |        |                                                              |  |
| 3401 | 15 | 15q14         | 35265244 | 35314060 | 48817  | 0.14  | N | L |        |        |                                                              |  |
| 3402 | 15 | 15q14         | 35696744 | 35722240 | 25497  | 0.22  | Y | L |        |        |                                                              |  |
| 3403 | 15 | 15q14         | 35951031 | 36032062 | 81032  | 1.70  | Y | L |        |        |                                                              |  |
| 3404 | 15 | 15q14         | 37108773 | 37144103 | 35331  | 0.25  | N | L |        |        |                                                              |  |
| 3405 | 15 | 15q14         | 37294732 | 37344088 | 49357  | 0.56  | N | L |        |        |                                                              |  |
| 3406 | 15 | 15q15.1       | 39289061 | 39312649 | 23589  | 0.34  | N | L | 606988 |        |                                                              |  |
| 3407 | 15 | 15q15.1       | 40205377 | 40215084 | 9708   | 0.36  | Y | L |        |        |                                                              |  |
| 3408 | 15 | 15q15.3       | 41680133 | 41724891 | 44759  | 1.17  | Y | C | 611102 | 611102 | Deafness and male infertility (4)                            |  |
| 3409 | 15 | 15q21.1       | 43304465 | 43313258 | 8794   | 0.36  | N | L |        |        |                                                              |  |
| 3410 | 15 | 15q21.1       | 44112176 | 44140483 | 28308  | 0.61  | N | L |        |        |                                                              |  |
| 3411 | 15 | 15q21.1       | 44304575 | 44336428 | 31854  | 1.45  | N | L |        |        |                                                              |  |
| 3412 | 15 | 15q21.1       | 44429555 | 44464565 | 35011  | 0.11  | N | L |        |        |                                                              |  |
| 3413 | 15 | 15q21.1       | 44493900 | 44563153 | 69254  | 1.31  | N | C |        |        |                                                              |  |
| 3414 | 15 | 15q21.1       | 44937434 | 44946108 | 8675   | 0.06  | N | L |        |        |                                                              |  |
| 3415 | 15 | 15q21.1       | 45485333 | 45542074 | 56742  | 1.76  | N | L |        |        |                                                              |  |
| 3416 | 15 | 15q21.1       | 45608430 | 45620119 | 11690  | 0.08  | N | L |        |        |                                                              |  |
| 3417 | 15 | 15q21.1       | 46628336 | 46648809 | 20474  | 0.06  | N | L | 134797 | 134797 | Aortic aneurysm, ascending, and dissection (3)               |  |
| 3418 | 15 | 15q21.1       | 47385600 | 47471374 | 85775  | 0.06  | Y | L | 137028 |        |                                                              |  |
| 3419 | 15 | 15q21.1       | 47509043 | 47542036 | 32994  | 0.14  | N | L | 148180 |        |                                                              |  |
| 3420 | 15 | 15q21.2       | 47725523 | 47759789 | 34267  | 0.56  | N | L |        |        |                                                              |  |
| 3421 | 15 | 15q21.2       | 48064359 | 48070212 | 5854   | 0.06  | N | L | 609123 |        |                                                              |  |
| 3422 | 15 | 15q21.2       | 49755693 | 49764604 | 8912   | 0.06  | N | L | 611796 |        |                                                              |  |
| 3423 | 15 | 15q21.2       | 50568378 | 50598818 | 30441  | 0.06  | N | L | 160777 | 160777 | Griscelli syndrome, type 1, 214450 (3)                       |  |
| 3424 | 15 | 15q21.3       | 51156595 | 51211903 | 55309  | 0.84  | N | L |        |        |                                                              |  |
| 3425 | 15 | 15q21.3       | 51414491 | 51426668 | 12178  | 0.08  | N | L |        |        |                                                              |  |
| 3426 | 15 | 15q21.3       | 51518440 | 51536511 | 18072  | 0.20  | N | L |        |        |                                                              |  |
| 3427 | 15 | 15q21.3       | 51603044 | 51615345 | 12302  | 0.06  | N | L |        |        |                                                              |  |
| 3428 | 15 | 15q21.3       | 51650855 | 51847299 | 196445 | 0.11  | Y | L |        |        |                                                              |  |
| 3429 | 15 | 15q21.3       | 51909294 | 51916390 | 7097   | 0.06  | Y | L |        |        |                                                              |  |
| 3430 | 15 | 15q21.3       | 52032733 | 52036239 | 3507   | 0.39  | Y | L |        |        |                                                              |  |
| 3431 | 15 | 15q21.3       | 52383774 | 52410053 | 26280  | 0.61  | N | L |        |        |                                                              |  |
| 3432 | 15 | 15q21.3       | 52882177 | 52910168 | 27992  | 0.08  | Y | L |        |        |                                                              |  |
| 3433 | 15 | 15q21.3       | 53001987 | 53013010 | 11024  | 0.06  | Y | C |        |        |                                                              |  |
| 3434 | 15 | 15q21.3       | 53029446 | 53049743 | 20298  | 0.28  | Y | L |        |        |                                                              |  |
| 3435 | 15 | 15q21.3       | 54575146 | 54588993 | 13848  | 0.81  | Y | L |        |        |                                                              |  |
| 3436 | 15 | 15q22.1       | 56079725 | 56089633 | 9909   | 0.11  | N | L | 603687 |        |                                                              |  |
| 3437 | 15 | 15q22.1       | 56114639 | 56231848 | 117210 | 0.06  | N | L | 603687 |        |                                                              |  |
| 3438 | 15 | 15q22.2       | 58272805 | 58328471 | 55667  | 0.22  | N | L |        |        |                                                              |  |
| 3439 | 15 | 15q22.2       | 59320793 | 59358620 | 37828  | 0.08  | N | L |        |        |                                                              |  |
| 3440 | 15 | 15q22.2       | 59634303 | 59650425 | 16123  | 0.06  | N | L |        |        |                                                              |  |
| 3441 | 15 | 15q22.2       | 60100132 | 60126018 | 25887  | 0.11  | N | L | 608879 |        |                                                              |  |
| 3442 | 15 | 15q22.2       | 60519622 | 60540275 | 20654  | 0.06  | N | L |        |        |                                                              |  |
| 3443 | 15 | 15q22.2       | 60990221 | 61002704 | 12484  | 0.14  | N | L |        |        |                                                              |  |
| 3444 | 15 | 15q23         | 67231118 | 67295221 | 64104  | 0.14  | Y | L | 612134 |        |                                                              |  |
| 3445 | 15 | 15q23         | 69743190 | 69761364 | 18175  | 0.06  | N | L |        |        |                                                              |  |
| 3446 | 15 | 15q24.3       | 74656984 | 74683032 | 26049  | 4.67  | Y | C | 611611 |        |                                                              |  |

|      |    |                 |          |          |         |       |   |   |        |        |                                                                                     |
|------|----|-----------------|----------|----------|---------|-------|---|---|--------|--------|-------------------------------------------------------------------------------------|
| 3447 | 15 | 15q25.1         | 77590462 | 77592580 | 2119    | 0.08  | Y | G |        |        |                                                                                     |
| 3448 | 15 | 15q25.1         | 77671229 | 77735204 | 63976   | 0.34  | Y | L |        |        |                                                                                     |
| 3449 | 15 | 15q25.2         | 79923467 | 79975318 | 51852   | 0.06  | Y | L |        |        |                                                                                     |
| 3450 | 15 | 15q25.2         | 82656718 | 82719057 | 62340   | 0.36  | Y | C |        |        |                                                                                     |
| 3451 | 15 | 15q25.3         | 84650305 | 85053928 | 403624  | 0.59  | Y | L |        |        |                                                                                     |
| 3452 | 15 | 15q25.3         | 85086169 | 85125768 | 39600   | 1.15  | N | L |        |        |                                                                                     |
| 3453 | 15 | 15q25.3         | 85310886 | 85320968 | 10083   | 0.14  | N | L |        |        |                                                                                     |
| 3454 | 15 | 15q25.3         | 85371264 | 85383703 | 12440   | 0.11  | N | L |        |        |                                                                                     |
| 3455 | 15 | 15q25.3         | 85777810 | 85843647 | 65838   | 0.22  | Y | L |        |        |                                                                                     |
| 3456 | 15 | 15q25.3         | 85876243 | 85902437 | 26195   | 0.06  | N | L |        |        |                                                                                     |
| 3457 | 15 | 15q25.3         | 85939205 | 86009815 | 70611   | 0.17  | N | L |        |        |                                                                                     |
| 3458 | 15 | 15q25.3         | 86848342 | 86879640 | 31299   | 0.17  | N | C | 608727 |        |                                                                                     |
| 3459 | 15 | 15q26.1         | 86999086 | 87041919 | 42834   | 0.73  | N | C | 604533 |        |                                                                                     |
| 3460 | 15 | 15q26.1         | 90012745 | 90026564 | 13820   | 0.06  | N | L |        |        |                                                                                     |
| 3461 | 15 | 15q26.2         | 92874642 | 92970877 | 96236   | 0.50  | Y | L |        |        |                                                                                     |
| 3462 | 15 | 15q26.2         | 93465782 | 93491492 | 25711   | 0.14  | N | L |        |        |                                                                                     |
| 3463 | 15 | 15q26.2         | 93782448 | 93801380 | 18933   | 0.08  | N | L |        |        |                                                                                     |
| 3464 | 15 | 15q26.2         | 95358720 | 95365475 | 6756    | 0.06  | N | G |        |        |                                                                                     |
| 3465 | 15 | 15q26.2         | 95892529 | 95907472 | 14944   | 0.08  | Y | L |        |        |                                                                                     |
| 3466 | 15 | 15q26.2         | 96162547 | 96175494 | 12948   | 0.08  | N | L |        |        |                                                                                     |
| 3467 | 15 | 15q26.3         | 96633876 | 96650361 | 16486   | 1.06  | N | L |        |        |                                                                                     |
| 3468 | 15 | 15q26.3         | 97579682 | 97633715 | 54034   | 0.14  | N | L |        |        |                                                                                     |
| 3469 | 15 | 15q26.3         | 98448248 | 98710443 | 262196  | 0.14  | Y | L | 607511 |        |                                                                                     |
| 3470 | 16 | 16p13.3         | 1791827  | 1860741  | 68915   | 1.45  | Y | L | 138760 | 138760 | [Glyoxalase II deficiency] (1)                                                      |
| 3471 | 16 | 16p13.3         | 2578425  | 2604877  | 26453   | 0.06  | Y | G | 605213 |        |                                                                                     |
| 3472 | 16 | 16p13.3         | 5546417  | 5551122  | 4706    | 0.06  | Y | L |        |        |                                                                                     |
| 3473 | 16 | 16p13.3         | 5695824  | 5699071  | 3248    | 0.06  | N | C |        |        |                                                                                     |
| 3474 | 16 | 16p13.3         | 6084649  | 6102147  | 17499   | 0.08  | Y | L |        |        |                                                                                     |
| 3475 | 16 | 16p13.3         | 6109690  | 6115162  | 5473    | 0.08  | Y | L |        |        |                                                                                     |
| 3476 | 16 | 16p13.2         | 6484551  | 6519980  | 35430   | 0.06  | Y | L |        |        |                                                                                     |
| 3477 | 16 | 16p13.2         | 6592985  | 7055720  | 462736  | 1.09  | Y | C |        |        |                                                                                     |
| 3478 | 16 | 16p13.2         | 7086270  | 7123346  | 37077   | 0.08  | N | L |        |        |                                                                                     |
| 3479 | 16 | 16p13.2         | 7134152  | 7167123  | 32972   | 0.14  | N | L |        |        |                                                                                     |
| 3480 | 16 | 16p13.2         | 7712250  | 7788193  | 75944   | 0.50  | N | L |        |        |                                                                                     |
| 3481 | 16 | 16p13.2         | 9305936  | 9310594  | 4659    | 0.22  | N | L |        |        |                                                                                     |
| 3482 | 16 | 16p13.13        | 11435141 | 11494591 | 59451   | 0.17  | N | L |        |        |                                                                                     |
| 3483 | 16 | 16p13.12        | 12572199 | 12582997 | 10799   | 0.34  | Y | L |        |        |                                                                                     |
| 3484 | 16 | 16p13.11        | 14897352 | 15061218 | 163867  | 0.67  | Y | C | 609157 |        |                                                                                     |
| 3485 | 16 | 16p13.11        | 15417683 | 16638105 | 1220423 | 0.31  | Y | C | 609449 |        |                                                                                     |
| 3486 | 16 | 16p12.2-16p12.1 | 21510499 | 21745742 | 235244  | 0.17  | Y | L | 609388 |        |                                                                                     |
| 3487 | 16 | 16p12.1         | 22464617 | 22618629 | 154013  | 2.91  | Y | L |        |        |                                                                                     |
| 3488 | 16 | 16p12.1         | 26002337 | 26009802 | 7466    | 0.11  | N | L | 604059 |        |                                                                                     |
| 3489 | 16 | 16p12.1         | 26111801 | 26177141 | 65341   | 0.08  | Y | L |        |        |                                                                                     |
| 3490 | 16 | 16p12.1         | 26457822 | 26495174 | 37353   | 0.11  | N | L |        |        |                                                                                     |
| 3491 | 16 | 16p11.2         | 31867430 | 33670616 | 1803187 | 10.65 | Y | C |        |        |                                                                                     |
| 3492 | 16 | 16q12.1         | 47738861 | 47763796 | 24936   | 0.08  | N | L |        |        |                                                                                     |
| 3493 | 16 | 16q12.1         | 50115829 | 50156761 | 40933   | 0.06  | N | L |        |        |                                                                                     |
| 3494 | 16 | 16q12.1         | 50485872 | 50504439 | 18568   | 0.20  | Y | L |        |        |                                                                                     |
| 3495 | 16 | 16q12.1         | 50777443 | 50806978 | 29536   | 0.95  | Y | L |        |        |                                                                                     |
| 3496 | 16 | 16q12.1         | 50975089 | 51011068 | 35980   | 0.11  | N | C |        |        |                                                                                     |
| 3497 | 16 | 16q12.2         | 52433213 | 52444382 | 11170   | 0.11  | N | L | 610966 | 610966 | Growth retardation, developmental delay, coarse facies, and early death, 612938 (3) |
| 3498 | 16 | 16q12.2         | 53299741 | 53336408 | 36668   | 0.20  | Y | L |        |        |                                                                                     |
| 3499 | 16 | 16q12.2         | 53882623 | 53908608 | 25986   | 0.36  | Y | L |        |        |                                                                                     |
| 3500 | 16 | 16q12.2         | 54339259 | 54374147 | 34889   | 15.32 | Y | C |        |        |                                                                                     |
| 3501 | 16 | 16q13           | 54737972 | 54755597 | 17626   | 0.06  | N | L |        |        |                                                                                     |
| 3502 | 16 | 16q13           | 56137151 | 56162953 | 25803   | 0.25  | N | L |        |        |                                                                                     |
| 3503 | 16 | 16q21           | 57886858 | 57895470 | 8613    | 0.14  | N | L |        |        |                                                                                     |
| 3504 | 16 | 16q21           | 58144475 | 58150418 | 5944    | 0.06  | N | L |        |        |                                                                                     |
| 3505 | 16 | 16q21           | 58184535 | 58274675 | 90141   | 1.65  | Y | L |        |        |                                                                                     |
| 3506 | 16 | 16q21           | 58609850 | 58684314 | 74465   | 0.25  | Y | L |        |        |                                                                                     |
| 3507 | 16 | 16q21           | 59012570 | 59044175 | 31606   | 0.22  | N | L |        |        |                                                                                     |
| 3508 | 16 | 16q21           | 59078050 | 59096039 | 17990   | 0.06  | N | L |        |        |                                                                                     |
| 3509 | 16 | 16q21           | 59380592 | 59415371 | 34780   | 1.26  | Y | L |        |        |                                                                                     |
| 3510 | 16 | 16q21           | 59586354 | 59591619 | 5266    | 0.08  | N | L |        |        |                                                                                     |
| 3511 | 16 | 16q21           | 59650895 | 59666525 | 15631   | 0.34  | N | L |        |        |                                                                                     |
| 3512 | 16 | 16q21           | 60182502 | 60210690 | 28189   | 0.11  | N | L |        |        |                                                                                     |
| 3513 | 16 | 16q21           | 60259838 | 60331610 | 71773   | 0.98  | N | L | 603008 |        |                                                                                     |
| 3514 | 16 | 16q21           | 61111389 | 61155779 | 44391   | 0.25  | N | L |        |        |                                                                                     |

|      |    |         |          |          |         |      |   |   |        |        |                                                                                                                       |
|------|----|---------|----------|----------|---------|------|---|---|--------|--------|-----------------------------------------------------------------------------------------------------------------------|
| 3515 | 16 | 16q21   | 61839145 | 61930790 | 91646   | 0.08 | N | L |        |        |                                                                                                                       |
| 3516 | 16 | 16q21   | 62006171 | 62103057 | 96887   | 0.06 | Y | C |        |        |                                                                                                                       |
| 3517 | 16 | 16q21   | 62435145 | 62458004 | 22860   | 0.06 | N | L |        |        |                                                                                                                       |
| 3518 | 16 | 16q21   | 62682725 | 62714192 | 31468   | 0.14 | Y | L |        |        |                                                                                                                       |
| 3519 | 16 | 16q21   | 62839427 | 62859898 | 20472   | 0.08 | N | L |        |        |                                                                                                                       |
| 3520 | 16 | 16q21   | 62988267 | 63090649 | 102383  | 1.98 | N | C |        |        |                                                                                                                       |
| 3521 | 16 | 16q21   | 63365192 | 63390320 | 25129   | 0.73 | N | L |        |        |                                                                                                                       |
| 3522 | 16 | 16q21   | 64031968 | 64052125 | 20158   | 0.08 | Y | L |        |        |                                                                                                                       |
| 3523 | 16 | 16q22.1 | 65528758 | 65530882 | 2125    | 0.06 | N | L | 605278 |        |                                                                                                                       |
| 3524 | 16 | 16q22.1 | 68662403 | 68768794 | 106392  | 1.45 | Y | C |        |        |                                                                                                                       |
| 3525 | 16 | 16q22.3 | 70876248 | 70901689 | 25442   | 0.39 | N | L |        |        |                                                                                                                       |
| 3526 | 16 | 16q22.3 | 72740408 | 72763563 | 23156   | 0.14 | N | L |        |        |                                                                                                                       |
| 3527 | 16 | 16q23.1 | 74565346 | 74578601 | 13256   | 1.34 | Y | L |        |        |                                                                                                                       |
| 3528 | 16 | 16q23.1 | 74597243 | 74611517 | 14275   | 0.11 | Y | L |        |        |                                                                                                                       |
| 3529 | 16 | 16q23.1 | 74775685 | 74798500 | 22816   | 0.28 | N | L |        |        |                                                                                                                       |
| 3530 | 16 | 16q23.1 | 74995506 | 75006258 | 10753   | 0.11 | N | L | 610518 |        |                                                                                                                       |
| 3531 | 16 | 16q23.1 | 75096667 | 75102675 | 6009    | 0.06 | Y | G | 610518 |        |                                                                                                                       |
| 3532 | 16 | 16q23.1 | 75237913 | 75332419 | 94507   | 0.87 | Y | L |        |        |                                                                                                                       |
| 3533 | 16 | 16q23.1 | 75445638 | 75464566 | 18929   | 0.36 | Y | L |        |        |                                                                                                                       |
| 3534 | 16 | 16q23.1 | 75758986 | 76042086 | 283101  | 0.14 | Y | C | 608954 |        |                                                                                                                       |
| 3535 | 16 | 16q23.1 | 76154858 | 76170451 | 15594   | 0.06 | N | L |        |        |                                                                                                                       |
| 3536 | 16 | 16q23.1 | 76598770 | 76671254 | 72485   | 0.11 | Y | L |        |        |                                                                                                                       |
| 3537 | 16 | 16q23.1 | 76753765 | 76789886 | 36122   | 0.06 | Y | L | 605131 | 605131 | Esophageal squamous cell carcinoma, 133239 (3)                                                                        |
| 3538 | 16 | 16q23.1 | 76899423 | 76948880 | 49458   | 0.36 | Y | L | 605131 | 605131 | Esophageal squamous cell carcinoma, 133239 (3)                                                                        |
| 3539 | 16 | 16q23.1 | 77296207 | 77325938 | 29732   | 0.14 | Y | L | 605131 | 605131 | Esophageal squamous cell carcinoma, 133239 (3)                                                                        |
| 3540 | 16 | 16q23.1 | 77989354 | 78018816 | 29463   | 0.06 | N | L |        |        |                                                                                                                       |
| 3541 | 16 | 16q23.2 | 78342127 | 78358263 | 16137   | 0.75 | N | L |        |        |                                                                                                                       |
| 3542 | 16 | 16q23.2 | 78526624 | 78534146 | 7523    | 0.08 | N | L |        |        |                                                                                                                       |
| 3543 | 16 | 16q23.2 | 78593609 | 78620570 | 26962   | 0.08 | Y | L |        |        |                                                                                                                       |
| 3544 | 16 | 16q23.2 | 78717517 | 78722136 | 4620    | 0.06 | N | L |        |        |                                                                                                                       |
| 3545 | 16 | 16q23.2 | 79917326 | 79929995 | 12670   | 0.36 | N | G | 605379 | 605379 | Giant axonal neuropathy-1, 256850 (3)                                                                                 |
| 3546 | 16 | 16q23.3 | 80582309 | 80617391 | 35083   | 0.06 | N | L |        |        |                                                                                                                       |
| 3547 | 16 | 16q23.3 | 80838726 | 80951778 | 113053  | 0.08 | Y | L |        |        |                                                                                                                       |
| 3548 | 16 | 16q23.3 | 81262670 | 81270190 | 7521    | 0.06 | N | C | 601364 |        |                                                                                                                       |
| 3549 | 16 | 16q23.3 | 81389415 | 81405558 | 16144   | 0.08 | Y | L | 601364 |        |                                                                                                                       |
| 3550 | 16 | 16q23.3 | 81722360 | 81738963 | 16604   | 0.11 | N | C | 601364 |        |                                                                                                                       |
| 3551 | 16 | 16q24.1 | 83039456 | 83091198 | 51743   | 0.06 | Y | L |        |        |                                                                                                                       |
| 3552 | 16 | 16q24.1 | 85198336 | 85218139 | 19804   | 0.17 | N | L |        |        |                                                                                                                       |
| 3553 | 16 | 16q24.1 | 85486841 | 85524388 | 37548   | 0.06 | Y | L |        |        |                                                                                                                       |
| 3554 | 16 | 16q24.2 | 86113589 | 86172026 | 58438   | 0.14 | Y | L |        |        |                                                                                                                       |
| 3555 | 17 | 17p13.3 | 53206    | 124733   | 71528   | 0.06 | Y | L | 604881 |        |                                                                                                                       |
| 3556 | 17 | 17p13.3 | 659936   | 781154   | 121219  | 0.61 | Y | L | 612895 |        |                                                                                                                       |
| 3557 | 17 | 17p13.2 | 3928122  | 3945948  | 17827   | 0.17 | N | L |        |        |                                                                                                                       |
| 3558 | 17 | 17p13.2 | 5496043  | 5509940  | 13898   | 0.06 | N | L |        |        |                                                                                                                       |
| 3559 | 17 | 17p13.2 | 6079655  | 6103002  | 23348   | 0.08 | Y | L |        |        |                                                                                                                       |
| 3560 | 17 | 17p13.2 | 6498748  | 6520758  | 22011   | 0.06 | N | L |        |        |                                                                                                                       |
| 3561 | 17 | 17p13.1 | 9182678  | 9184645  | 1968    | 0.48 | Y | L | 604203 |        |                                                                                                                       |
| 3562 | 17 | 17p12   | 13116686 | 13152707 | 36022   | 0.08 | N | L |        |        |                                                                                                                       |
| 3563 | 17 | 17p12   | 13431673 | 13569032 | 137360  | 0.06 | Y | L | 604057 |        |                                                                                                                       |
| 3564 | 17 | 17p12   | 13930270 | 13958666 | 28397   | 0.11 | Y | L | 602125 | 602125 | Encephalopathy, progressive mitochondrial, with proximal renal tubulopathy due to cytochrome c oxidase deficiency (3) |
| 3565 | 17 | 17p12   | 14048304 | 15362349 | 1314046 | 7.77 | Y | C | 602125 | 602125 | Encephalopathy, progressive mitochondrial, with proximal renal tubulopathy due to cytochrome c                        |

|      |    |                   |          |          |         |      |   |   |        |        |  |                                                    |
|------|----|-------------------|----------|----------|---------|------|---|---|--------|--------|--|----------------------------------------------------|
|      |    |                   |          |          |         |      |   |   |        |        |  | oxidase deficiency (3)                             |
| 3566 | 17 | 17p11.2           | 16601446 | 16665029 | 63584   | 1.96 | Y | L |        |        |  |                                                    |
| 3567 | 17 | 17p11.2           | 18220223 | 18222670 | 2448    | 0.06 | Y | L |        |        |  |                                                    |
| 3568 | 17 | 17p11.2           | 18230657 | 18421155 | 190499  | 1.51 | Y | C |        |        |  |                                                    |
| 3569 | 17 | 17p11.2           | 21689872 | 21772864 | 82993   | 0.11 | Y | L |        |        |  |                                                    |
| 3570 | 17 | 17p11.2           | 21832211 | 21856176 | 23966   | 0.06 | Y | L |        |        |  |                                                    |
| 3571 | 17 | 17q11.1           | 22463868 | 22565699 | 101832  | 0.48 | Y | C |        |        |  |                                                    |
| 3572 | 17 | 17q11.2           | 25606201 | 25628875 | 22675   | 0.06 | N | L | 602403 | 602403 |  | {Alzheimer disease, susceptibility to}, 104300 (3) |
| 3573 | 17 | 17q12             | 30708220 | 30777788 | 69569   | 0.06 | Y | L |        |        |  |                                                    |
| 3574 | 17 | 17q12             | 31460821 | 31641591 | 180771  | 6.82 | Y | C | 610144 |        |  |                                                    |
| 3575 | 17 | 17q21.2           | 36385766 | 36408189 | 22424   | 0.06 | Y | L |        |        |  |                                                    |
| 3576 | 17 | 17q21.2           | 36468712 | 36481510 | 12799   | 0.08 | Y | C |        |        |  |                                                    |
| 3577 | 17 | 17q21.2           | 36662283 | 36683751 | 21469   | 0.17 | Y | G |        |        |  |                                                    |
| 3578 | 17 | 17q21.2           | 37127601 | 37150369 | 22769   | 0.06 | Y | L | 600947 |        |  |                                                    |
| 3579 | 17 | 17q21.31          | 40958816 | 41015758 | 56943   | 8.75 | Y | G |        |        |  |                                                    |
| 3580 | 17 | 17q21.31-17q21.32 | 41570665 | 42145871 | 575207  | 4.39 | Y | C | 612452 |        |  |                                                    |
| 3581 | 17 | 17q21.33          | 47334364 | 47468516 | 134153  | 5.81 | N | L | 604642 |        |  |                                                    |
| 3582 | 17 | 17q22             | 47654020 | 47698988 | 44969   | 0.14 | N | L |        |        |  |                                                    |
| 3583 | 17 | 17q22             | 47870136 | 47893440 | 23305   | 0.61 | Y | L |        |        |  |                                                    |
| 3584 | 17 | 17q22             | 47895010 | 48096000 | 200991  | 2.54 | Y | L |        |        |  |                                                    |
| 3585 | 17 | 17q22             | 48118637 | 48133544 | 14908   | 0.06 | Y | L |        |        |  |                                                    |
| 3586 | 17 | 17q22             | 48236032 | 48275354 | 39323   | 0.28 | N | L |        |        |  |                                                    |
| 3587 | 17 | 17q22             | 48485375 | 48558233 | 72859   | 0.31 | Y | L |        |        |  |                                                    |
| 3588 | 17 | 17q22             | 48685319 | 48698498 | 13180   | 0.28 | N | C |        |        |  |                                                    |
| 3589 | 17 | 17q22             | 48725947 | 48762129 | 36183   | 0.11 | N | C |        |        |  |                                                    |
| 3590 | 17 | 17q22             | 48899896 | 48919444 | 19549   | 0.08 | N | L |        |        |  |                                                    |
| 3591 | 17 | 17q22             | 49052241 | 49107801 | 55561   | 0.22 | Y | L |        |        |  |                                                    |
| 3592 | 17 | 17q22             | 49241361 | 49264048 | 22688   | 0.25 | N | C |        |        |  |                                                    |
| 3593 | 17 | 17q22             | 49341258 | 49372911 | 31654   | 0.08 | N | L |        |        |  |                                                    |
| 3594 | 17 | 17q22             | 49471762 | 49519953 | 48192   | 0.06 | Y | L |        |        |  |                                                    |
| 3595 | 17 | 17q22             | 49554137 | 49599985 | 45849   | 0.06 | Y | L |        |        |  |                                                    |
| 3596 | 17 | 17q22             | 50976491 | 50983827 | 7337    | 0.14 | N | L |        |        |  |                                                    |
| 3597 | 17 | 17q22             | 51442621 | 51462287 | 19667   | 0.08 | N | L |        |        |  |                                                    |
| 3598 | 17 | 17q22             | 51518046 | 51522149 | 4104    | 0.31 | Y | L |        |        |  |                                                    |
| 3599 | 17 | 17q23.1           | 55467159 | 55542697 | 75539   | 0.06 | Y | L |        |        |  |                                                    |
| 3600 | 17 | 17q23.3           | 58724223 | 58747932 | 23710   | 0.11 | Y | L |        |        |  |                                                    |
| 3601 | 17 | 17q23.3           | 59293400 | 59300972 | 7573    | 0.08 | N | L | 612756 |        |  |                                                    |
| 3602 | 17 | 17q23.3           | 59323741 | 59332401 | 8661    | 0.06 | Y | L | 150200 | 150200 |  | [Placental lactogen deficiency] (1)                |
| 3603 | 17 | 17q24.2           | 63717894 | 63734342 | 16449   | 0.06 | Y | L |        |        |  |                                                    |
| 3604 | 17 | 17q24.2-17q24.3   | 64593327 | 64640724 | 47398   | 0.17 | N | L | 612504 |        |  |                                                    |
| 3605 | 17 | 17q24.3           | 65224434 | 65281948 | 57515   | 1.76 | Y | L |        |        |  |                                                    |
| 3606 | 17 | 17q24.3           | 65684683 | 65698743 | 14061   | 0.06 | Y | L | 609622 |        |  |                                                    |
| 3607 | 17 | 17q24.3           | 65988011 | 66017832 | 29822   | 0.06 | N | L |        |        |  |                                                    |
| 3608 | 17 | 17q24.3           | 66313271 | 66344843 | 31573   | 0.08 | Y | L |        |        |  |                                                    |
| 3609 | 17 | 17q24.3           | 66544068 | 66573542 | 29475   | 0.06 | N | L |        |        |  |                                                    |
| 3610 | 17 | 17q25.3           | 78138177 | 78152456 | 14280   | 0.08 | Y | L | 147685 |        |  |                                                    |
| 3611 | 17 | 17q25.3           | 78278822 | 78598059 | 319238  | 0.06 | Y | L | 611683 |        |  |                                                    |
| 3612 | 18 | 18p11.32          | 556272   | 580003   | 23732   | 0.06 | Y | L | 603187 |        |  |                                                    |
| 3613 | 18 | 18p11.32          | 973188   | 1007587  | 34400   | 0.06 | N | L |        |        |  |                                                    |
| 3614 | 18 | 18p11.32          | 1703347  | 1738722  | 35376   | 0.20 | Y | L |        |        |  |                                                    |
| 3615 | 18 | 18p11.32          | 1859643  | 1898780  | 39138   | 0.17 | Y | L |        |        |  |                                                    |
| 3616 | 18 | 18p11.32          | 1957238  | 1997871  | 40634   | 0.48 | Y | L |        |        |  |                                                    |
| 3617 | 18 | 18p11.32          | 2156853  | 2163323  | 6471    | 0.34 | N | L |        |        |  |                                                    |
| 3618 | 18 | 18p11.22-18p11.21 | 10222864 | 11370768 | 1147905 | 0.14 | Y | C | 607479 |        |  |                                                    |
| 3619 | 18 | 18p11.21          | 11459601 | 11475481 | 15881   | 0.53 | N | L |        |        |  |                                                    |
| 3620 | 18 | 18p11.21          | 13540195 | 13597040 | 56846   | 0.06 | N | L | 606571 |        |  |                                                    |
| 3621 | 18 | 18p11.21          | 13981804 | 13983247 | 1444    | 0.06 | N | L |        |        |  |                                                    |
| 3622 | 18 | 18p11.21          | 14174684 | 14315522 | 140839  | 0.98 | Y | L |        |        |  |                                                    |
| 3623 | 18 | 18p11.21          | 14338517 | 14361634 | 23118   | 0.20 | Y | L |        |        |  |                                                    |
| 3624 | 18 | 18p11.21          | 14410242 | 14460351 | 50110   | 0.06 | Y | L |        |        |  |                                                    |
| 3625 | 18 | 18p11.21          | 14705283 | 14727927 | 22645   | 0.08 | Y | C |        |        |  |                                                    |
| 3626 | 18 | 18p11.21          | 15160410 | 15172029 | 11620   | 0.06 | Y | L |        |        |  |                                                    |
| 3627 | 18 | 18q11.2           | 18795331 | 18830382 | 35052   | 0.06 | N | L | 604124 | 604124 |  | Pancreatic carcinoma, somatic (3)                  |
| 3628 | 18 | 18q12.1           | 23524369 | 23546185 | 21817   | 0.25 | N | L |        |        |  |                                                    |
| 3629 | 18 | 18q12.1           | 23618443 | 23642990 | 24548   | 0.06 | N | L |        |        |  |                                                    |

|      |    |          |          |          |        |      |   |   |        |        |  |  |                                                        |
|------|----|----------|----------|----------|--------|------|---|---|--------|--------|--|--|--------------------------------------------------------|
| 3630 | 18 | 18q12.1  | 24157603 | 24207794 | 50192  | 0.31 | Y | L |        |        |  |  |                                                        |
| 3631 | 18 | 18q12.1  | 24420573 | 24450128 | 29556  | 0.14 | Y | L |        |        |  |  |                                                        |
| 3632 | 18 | 18q12.1  | 24521689 | 24555796 | 34108  | 0.25 | Y | L |        |        |  |  |                                                        |
| 3633 | 18 | 18q12.1  | 24624071 | 24656183 | 32113  | 0.81 | N | L |        |        |  |  |                                                        |
| 3634 | 18 | 18q12.1  | 24719076 | 24778026 | 58951  | 0.56 | N | L |        |        |  |  |                                                        |
| 3635 | 18 | 18q12.1  | 24844844 | 24907816 | 62973  | 3.13 | N | L |        |        |  |  |                                                        |
| 3636 | 18 | 18q12.1  | 24972304 | 24990195 | 17892  | 0.31 | N | L |        |        |  |  |                                                        |
| 3637 | 18 | 18q12.1  | 25268329 | 25641997 | 373669 | 0.08 | Y | L |        |        |  |  |                                                        |
| 3638 | 18 | 18q12.1  | 25735647 | 25906310 | 170664 | 0.11 | Y | L |        |        |  |  |                                                        |
| 3639 | 18 | 18q12.1  | 25966619 | 25978237 | 11619  | 0.06 | N | L |        |        |  |  |                                                        |
| 3640 | 18 | 18q12.1  | 26068546 | 26144579 | 76034  | 1.76 | Y | L |        |        |  |  |                                                        |
| 3641 | 18 | 18q12.1  | 26256705 | 26274579 | 17875  | 0.11 | Y | L |        |        |  |  |                                                        |
| 3642 | 18 | 18q12.1  | 26395877 | 26423660 | 27784  | 0.06 | Y | L |        |        |  |  |                                                        |
| 3643 | 18 | 18q12.1  | 27154326 | 27169603 | 15278  | 0.06 | N | L | 148700 |        |  |  |                                                        |
| 3644 | 18 | 18q12.1  | 28929384 | 28952136 | 22753  | 0.06 | N | L |        |        |  |  |                                                        |
| 3645 | 18 | 18q12.1  | 29097836 | 29106439 | 8604   | 0.08 | Y | L |        |        |  |  |                                                        |
| 3646 | 18 | 18q12.2  | 33762380 | 33789313 | 26934  | 0.06 | Y | L |        |        |  |  |                                                        |
| 3647 | 18 | 18q12.2  | 33926414 | 33958361 | 31948  | 0.08 | N | L |        |        |  |  |                                                        |
| 3648 | 18 | 18q12.2  | 34067989 | 34098218 | 30230  | 0.87 | N | L |        |        |  |  |                                                        |
| 3649 | 18 | 18q12.2  | 34315960 | 34359005 | 43046  | 0.73 | Y | L |        |        |  |  |                                                        |
| 3650 | 18 | 18q12.2  | 34424672 | 34494317 | 69646  | 1.06 | N | L |        |        |  |  |                                                        |
| 3651 | 18 | 18q12.2  | 34620154 | 34644442 | 24289  | 0.06 | N | L |        |        |  |  |                                                        |
| 3652 | 18 | 18q12.2  | 34700325 | 34748540 | 48216  | 1.84 | N | L |        |        |  |  |                                                        |
| 3653 | 18 | 18q12.2  | 34845546 | 34974065 | 128520 | 0.11 | Y | L |        |        |  |  |                                                        |
| 3654 | 18 | 18q12.2  | 35002025 | 35020193 | 18169  | 0.53 | N | L |        |        |  |  |                                                        |
| 3655 | 18 | 18q12.2  | 35101660 | 35124633 | 22974  | 0.17 | Y | L |        |        |  |  |                                                        |
| 3656 | 18 | 18q12.3  | 36143791 | 36193559 | 49769  | 0.56 | N | L |        |        |  |  |                                                        |
| 3657 | 18 | 18q12.3  | 36269528 | 36396942 | 127415 | 2.15 | Y | L |        |        |  |  |                                                        |
| 3658 | 18 | 18q12.3  | 36457123 | 36490748 | 33626  | 0.56 | N | L |        |        |  |  |                                                        |
| 3659 | 18 | 18q12.3  | 36887072 | 36984377 | 97306  | 4.25 | Y | L |        |        |  |  |                                                        |
| 3660 | 18 | 18q12.3  | 37338064 | 37410521 | 72458  | 3.19 | N | L |        |        |  |  |                                                        |
| 3661 | 18 | 18q12.3  | 38011151 | 38045044 | 33894  | 0.06 | Y | L |        |        |  |  |                                                        |
| 3662 | 18 | 18q12.3  | 38129718 | 38159285 | 29568  | 0.08 | N | L |        |        |  |  |                                                        |
| 3663 | 18 | 18q12.3  | 38256493 | 38310989 | 54497  | 0.45 | Y | L |        |        |  |  |                                                        |
| 3664 | 18 | 18q12.3  | 38406390 | 38433927 | 27538  | 0.36 | N | L |        |        |  |  |                                                        |
| 3665 | 18 | 18q12.3  | 38748885 | 38776461 | 27577  | 0.14 | N | L | 609592 |        |  |  |                                                        |
| 3666 | 18 | 18q12.3  | 38831521 | 38856409 | 24889  | 0.56 | N | L | 609592 |        |  |  |                                                        |
| 3667 | 18 | 18q12.3  | 39126231 | 39167395 | 41165  | 1.40 | Y | L |        |        |  |  |                                                        |
| 3668 | 18 | 18q12.3  | 39212799 | 39239914 | 27116  | 0.06 | N | L |        |        |  |  |                                                        |
| 3669 | 18 | 18q12.3  | 39498793 | 39515674 | 16882  | 0.34 | N | L |        |        |  |  |                                                        |
| 3670 | 18 | 18q12.3  | 39661213 | 39718840 | 57628  | 0.06 | N | L |        |        |  |  |                                                        |
| 3671 | 18 | 18q12.3  | 40278373 | 40302493 | 24121  | 0.28 | N | L |        |        |  |  |                                                        |
| 3672 | 18 | 18q12.3  | 40304874 | 40317439 | 12566  | 0.08 | N | L |        |        |  |  |                                                        |
| 3673 | 18 | 18q12.3  | 40940388 | 40967878 | 27491  | 0.17 | N | L |        |        |  |  |                                                        |
| 3674 | 18 | 18q12.3  | 41206382 | 41218022 | 11641  | 0.06 | N | L |        |        |  |  |                                                        |
| 3675 | 18 | 18q12.3  | 41432912 | 41438527 | 5616   | 0.06 | N | L |        |        |  |  |                                                        |
| 3676 | 18 | 18q21.1  | 46171733 | 46203757 | 32025  | 0.28 | Y | L |        |        |  |  |                                                        |
| 3677 | 18 | 18q21.2  | 47529693 | 47537980 | 8288   | 0.06 | N | L |        |        |  |  |                                                        |
| 3678 | 18 | 18q21.2  | 47822498 | 47861861 | 39364  | 1.03 | N | L |        |        |  |  |                                                        |
| 3679 | 18 | 18q21.2  | 47994772 | 48068713 | 73942  | 0.25 | N | L |        |        |  |  |                                                        |
| 3680 | 18 | 18q21.2  | 48158849 | 48209003 | 50155  | 1.98 | N | L | 120470 | 120470 |  |  | Colorectal cancer (3)                                  |
| 3681 | 18 | 18q21.2  | 48691533 | 48710064 | 18532  | 0.14 | N | L | 120470 | 120470 |  |  | Colorectal cancer (3)                                  |
| 3682 | 18 | 18q21.2  | 48805633 | 48843374 | 37742  | 0.75 | N | L | 120470 | 120470 |  |  | Colorectal cancer (3)                                  |
| 3683 | 18 | 18q21.2  | 48886578 | 48918580 | 32003  | 1.45 | N | L | 120470 | 120470 |  |  | Colorectal cancer (3)                                  |
| 3684 | 18 | 18q21.2  | 49368905 | 49379430 | 10526  | 0.28 | N | L |        |        |  |  |                                                        |
| 3685 | 18 | 18q21.2  | 49444088 | 49455889 | 11802  | 0.06 | N | L |        |        |  |  |                                                        |
| 3686 | 18 | 18q21.2  | 50145479 | 50238562 | 93084  | 0.50 | Y | L |        |        |  |  |                                                        |
| 3687 | 18 | 18q21.2  | 50503528 | 50537718 | 34191  | 0.06 | N | L |        |        |  |  |                                                        |
| 3688 | 18 | 18q21.2  | 50555544 | 50575767 | 20224  | 0.06 | N | L |        |        |  |  |                                                        |
| 3689 | 18 | 18q21.2  | 51069378 | 51085160 | 15783  | 0.08 | N | L | 610954 |        |  |  |                                                        |
| 3690 | 18 | 18q21.2  | 51910060 | 51945185 | 35126  | 1.40 | Y | L |        |        |  |  |                                                        |
| 3691 | 18 | 18q21.31 | 53098885 | 53111419 | 12535  | 0.11 | Y | L |        |        |  |  |                                                        |
| 3692 | 18 | 18q21.31 | 53470442 | 53485293 | 14852  | 0.14 | Y | L | 602397 | 602397 |  |  | Cholestasis, benign recurrent intrahepatic, 243300 (3) |
| 3693 | 18 | 18q21.32 | 56505659 | 56507323 | 1665   | 0.11 | N | L |        |        |  |  |                                                        |
| 3694 | 18 | 18q21.32 | 56611091 | 56646309 | 35219  | 0.92 | N | L |        |        |  |  |                                                        |
| 3695 | 18 | 18q21.32 | 56966504 | 57075634 | 109131 | 2.21 | N | L |        |        |  |  |                                                        |
| 3696 | 18 | 18q21.33 | 57282780 | 57295448 | 12669  | 0.06 | N | L |        |        |  |  |                                                        |

|      |    |                       |          |          |         |       |   |   |        |        |                                       |
|------|----|-----------------------|----------|----------|---------|-------|---|---|--------|--------|---------------------------------------|
| 3697 | 18 | 18q21.33              | 57756979 | 57785728 | 28750   | 0.11  | Y | L |        |        |                                       |
| 3698 | 18 | 18q21.33              | 59568501 | 59782026 | 213526  | 0.70  | Y | L | 603357 |        |                                       |
| 3699 | 18 | 18q22.1               | 59965395 | 59979366 | 13972   | 0.06  | N | L |        |        |                                       |
| 3700 | 18 | 18q22.1               | 60388289 | 60442384 | 54096   | 0.50  | N | L |        |        |                                       |
| 3701 | 18 | 18q22.1               | 60564291 | 60583660 | 19370   | 0.59  | Y | L |        |        |                                       |
| 3702 | 18 | 18q22.1               | 60685645 | 60738326 | 52682   | 0.08  | N | L |        |        |                                       |
| 3703 | 18 | 18q22.1               | 60999683 | 62766143 | 1766461 | 4.86  | Y | L | 605806 |        |                                       |
| 3704 | 18 | 18q22.1               | 63110481 | 63119574 | 9094    | 0.17  | Y | L |        |        |                                       |
| 3705 | 18 | 18q22.1               | 64058248 | 64066663 | 8416    | 0.11  | N | L |        |        |                                       |
| 3706 | 18 | 18q22.1               | 64086310 | 64099989 | 13680   | 0.20  | N | L |        |        |                                       |
| 3707 | 18 | 18q22.1               | 64124389 | 64208084 | 83696   | 1.29  | Y | L |        |        |                                       |
| 3708 | 18 | 18q22.1               | 64311087 | 64323206 | 12120   | 0.08  | Y | L |        |        |                                       |
| 3709 | 18 | 18q22.1-<br>18q22.2   | 64614277 | 64908767 | 294491  | 8.92  | Y | C |        |        |                                       |
| 3710 | 18 | 18q22.2               | 65060072 | 65112847 | 52776   | 0.42  | Y | L |        |        |                                       |
| 3711 | 18 | 18q22.2               | 66809128 | 66834690 | 25563   | 0.11  | Y | L |        |        |                                       |
| 3712 | 18 | 18q22.3               | 67218979 | 67268195 | 49217   | 0.95  | Y | L |        |        |                                       |
| 3713 | 18 | 18q22.3               | 67669846 | 67720279 | 50434   | 0.36  | Y | L |        |        |                                       |
| 3714 | 18 | 18q22.3               | 68499846 | 68526254 | 26409   | 0.08  | Y | L |        |        |                                       |
| 3715 | 18 | 18q22.3               | 69134108 | 69495049 | 360942  | 1.09  | Y | L |        |        |                                       |
| 3716 | 18 | 18q22.3               | 70217081 | 70224561 | 7481    | 0.11  | N | L |        |        |                                       |
| 3717 | 18 | 18q23                 | 73201919 | 73215463 | 13545   | 0.17  | Y | L |        |        |                                       |
| 3718 | 18 | 18q23                 | 74042920 | 74062469 | 19550   | 1.15  | N | L |        |        |                                       |
| 3719 | 18 | 18q23                 | 74691533 | 74707703 | 16171   | 0.06  | Y | L |        |        |                                       |
| 3720 | 18 | 18q23                 | 74763110 | 74772013 | 8904    | 0.17  | Y | L |        |        |                                       |
| 3721 | 19 | 19p13.3               | 6233628  | 6258294  | 24667   | 0.34  | N | L |        |        |                                       |
| 3722 | 19 | 19p13.2               | 7003471  | 7036480  | 33010   | 0.06  | Y | L |        |        |                                       |
| 3723 | 19 | 19p13.2               | 8238787  | 8254287  | 15501   | 0.08  | Y | L |        |        |                                       |
| 3724 | 19 | 19p13.2               | 8895426  | 8937991  | 42566   | 0.42  | Y | L | 606154 |        |                                       |
| 3725 | 19 | 19p13.2               | 9417119  | 9438080  | 20962   | 0.06  | N | L |        |        |                                       |
| 3726 | 19 | 19p13.12              | 15856295 | 15873757 | 17463   | 0.53  | N | L | 604426 |        |                                       |
| 3727 | 19 | 19p12                 | 20376183 | 20513074 | 136892  | 6.43  | Y | L |        |        |                                       |
| 3728 | 19 | 19p12                 | 21881415 | 21901800 | 20386   | 0.20  | Y | L |        |        |                                       |
| 3729 | 19 | 19p12                 | 22317585 | 22372453 | 54869   | 0.87  | Y | L | 603980 |        |                                       |
| 3730 | 19 | 19p12                 | 22611129 | 22657853 | 46725   | 0.48  | Y | C |        |        |                                       |
| 3731 | 19 | 19p12                 | 24225037 | 24255865 | 30829   | 0.08  | Y | L |        |        |                                       |
| 3732 | 19 | 19q12                 | 32439826 | 32910412 | 470587  | 14.84 | Y | L |        |        |                                       |
| 3733 | 19 | 19q12                 | 33482085 | 33497043 | 14959   | 0.14  | N | L |        |        |                                       |
| 3734 | 19 | 19q13.12              | 40534650 | 40553609 | 18960   | 6.34  | Y | L | 603820 |        |                                       |
| 3735 | 19 | 19q13.2               | 44889764 | 44921617 | 31854   | 0.06  | Y | L | 607260 |        |                                       |
| 3736 | 19 | 19q13.2               | 45064625 | 45091006 | 26382   | 0.95  | Y | C |        |        |                                       |
| 3737 | 19 | 19q13.2               | 46034548 | 46078535 | 43988   | 4.72  | Y | C | 122720 | 122720 | Coumarin<br>resistance, 122700<br>(3) |
| 3738 | 19 | 19q13.31              | 47980912 | 48462406 | 481495  | 23.70 | Y | C | 176394 |        |                                       |
| 3739 | 19 | 19q13.32              | 51416901 | 51422588 | 5688    | 0.06  | N | G |        |        |                                       |
| 3740 | 19 | 19q13.33              | 54334195 | 54374840 | 40646   | 0.11  | Y | L | 603144 |        |                                       |
| 3741 | 19 | 19q13.33              | 56829520 | 56846717 | 17198   | 9.42  | Y | C |        |        |                                       |
| 3742 | 19 | 19q13.33              | 57204296 | 57246697 | 42402   | 6.51  | Y | L |        |        |                                       |
| 3743 | 19 | 19q13.33-<br>19q13.41 | 57527022 | 57616991 | 89970   | 0.11  | Y | L |        |        |                                       |
| 3744 | 19 | 19q13.41              | 58017440 | 58043260 | 25821   | 0.98  | Y | C |        |        |                                       |
| 3745 | 19 | 19q13.41              | 58293461 | 58325362 | 31902   | 0.11  | Y | L | 600398 |        |                                       |
| 3746 | 19 | 19q13.41              | 58602836 | 58630258 | 27423   | 0.28  | Y | L |        |        |                                       |
| 3747 | 19 | 19q13.41              | 58633814 | 58675465 | 41652   | 0.14  | Y | L |        |        |                                       |
| 3748 | 19 | 19q13.41              | 58682096 | 58706990 | 24895   | 0.06  | Y | L |        |        |                                       |
| 3749 | 19 | 19q13.42              | 59416433 | 59445355 | 28923   | 2.79  | Y | C | 604820 |        |                                       |
| 3750 | 19 | 19q13.42              | 59477998 | 59502901 | 24904   | 0.11  | Y | G |        |        |                                       |
| 3751 | 19 | 19q13.42              | 59835303 | 59863989 | 28687   | 0.14  | Y | L | 604811 |        |                                       |
| 3752 | 19 | 19q13.42              | 59960184 | 60062882 | 102699  | 5.03  | Y | C | 610095 |        |                                       |
| 3753 | 19 | 19q13.42              | 60946897 | 60959857 | 12961   | 0.28  | Y | L |        |        |                                       |
| 3754 | 19 | 19q13.42              | 60969837 | 60974654 | 4818    | 0.22  | Y | C |        |        |                                       |
| 3755 | 19 | 19q13.42-<br>19q13.43 | 61329542 | 61406509 | 76968   | 0.14  | Y | C | 607874 |        |                                       |
| 3756 | 19 | 19q13.43              | 62699597 | 62700709 | 1113    | 0.08  | N | L |        |        |                                       |
| 3757 | 20 | 20p13                 | 1336219  | 1345410  | 9192    | 3.07  | Y | G |        |        |                                       |
| 3758 | 20 | 20p13                 | 1500761  | 1548594  | 47834   | 90.53 | Y | C | 603889 |        |                                       |
| 3759 | 20 | 20p13                 | 2717937  | 2735994  | 18058   | 0.06  | N | L | 609555 |        |                                       |
| 3760 | 20 | 20p13                 | 3719858  | 3735642  | 15785   | 0.11  | N | L | 116949 |        |                                       |
| 3761 | 20 | 20p13                 | 3985627  | 4022397  | 36771   | 0.06  | Y | L |        |        |                                       |
| 3762 | 20 | 20p13                 | 4188417  | 4195565  | 7149    | 0.25  | N | L |        |        |                                       |
| 3763 | 20 | 20p13                 | 4236946  | 4350637  | 113692  | 0.08  | N | C |        |        |                                       |
| 3764 | 20 | 20p12.3               | 5737386  | 5766470  | 29085   | 0.06  | Y | L |        |        |                                       |
| 3765 | 20 | 20p12.3               | 5990627  | 5998478  | 7852    | 0.06  | N | L |        |        |                                       |

|      |    |                       |          |          |        |      |   |   |        |
|------|----|-----------------------|----------|----------|--------|------|---|---|--------|
| 3766 | 20 | 20p12.3               | 6377864  | 6415269  | 37406  | 0.06 | Y | L |        |
| 3767 | 20 | 20p12.3               | 6466520  | 6519406  | 52887  | 1.20 | Y | L |        |
| 3768 | 20 | 20p12.3               | 6870810  | 6916142  | 45333  | 0.67 | N | L |        |
| 3769 | 20 | 20p12.3               | 6975661  | 6998105  | 22445  | 0.06 | N | L |        |
| 3770 | 20 | 20p12.3               | 7040386  | 7357467  | 317082 | 4.58 | Y | L |        |
| 3771 | 20 | 20p12.3               | 7407565  | 7413432  | 5868   | 0.22 | Y | L |        |
| 3772 | 20 | 20p12.3               | 7508872  | 7539596  | 30725  | 0.06 | N | L |        |
| 3773 | 20 | 20p12.3               | 7999771  | 8028075  | 28305  | 0.08 | Y | L |        |
| 3774 | 20 | 20p12.3               | 8159849  | 8271783  | 111935 | 0.75 | Y | L | 607120 |
| 3775 | 20 | 20p12.3               | 8431038  | 8494503  | 63466  | 0.06 | Y | L | 607120 |
| 3776 | 20 | 20p12.3               | 8757113  | 8760751  | 3639   | 0.17 | Y | L | 607120 |
| 3777 | 20 | 20p12.2               | 9020678  | 9104203  | 83526  | 1.45 | Y | L | 600810 |
| 3778 | 20 | 20p12.2               | 9185594  | 9233286  | 47693  | 0.48 | Y | L | 600810 |
| 3779 | 20 | 20p12.2               | 9711507  | 9739900  | 28394  | 0.22 | N | L | 608038 |
| 3780 | 20 | 20p12.2               | 9980038  | 10009497 | 29460  | 0.11 | N | L |        |
| 3781 | 20 | 20p12.2               | 10810592 | 10831131 | 20540  | 0.22 | N | L |        |
| 3782 | 20 | 20p12.2               | 10959588 | 11111049 | 151462 | 3.33 | Y | L |        |
| 3783 | 20 | 20p12.2               | 11115333 | 11135366 | 20034  | 0.34 | N | L |        |
| 3784 | 20 | 20p12.2               | 11237485 | 11253191 | 15707  | 0.17 | Y | L |        |
| 3785 | 20 | 20p12.2               | 11401540 | 11424884 | 23345  | 0.14 | N | L |        |
| 3786 | 20 | 20p12.1               | 12121791 | 12175306 | 53516  | 2.96 | Y | L |        |
| 3787 | 20 | 20p12.1               | 12295220 | 12314932 | 19713  | 0.31 | Y | L |        |
| 3788 | 20 | 20p12.1               | 12337312 | 12362548 | 25237  | 0.06 | Y | L |        |
| 3789 | 20 | 20p12.1               | 12429689 | 12438269 | 8581   | 0.08 | N | C |        |
| 3790 | 20 | 20p12.1               | 12572679 | 12581827 | 9149   | 0.14 | Y | L |        |
| 3791 | 20 | 20p12.1               | 13229446 | 13252833 | 23388  | 0.06 | N | L |        |
| 3792 | 20 | 20p12.1               | 13364358 | 13472355 | 107998 | 0.59 | N | L | 608270 |
| 3793 | 20 | 20p12.1               | 14526814 | 14553038 | 26225  | 0.20 | N | L | 611567 |
| 3794 | 20 | 20p12.1               | 14608944 | 15092469 | 483526 | 1.29 | Y | C | 611567 |
| 3795 | 20 | 20p12.1               | 15355876 | 15409519 | 53644  | 0.61 | Y | L | 611567 |
| 3796 | 20 | 20p12.1               | 15761491 | 15822844 | 61354  | 0.67 | Y | L | 611567 |
| 3797 | 20 | 20p12.1               | 15865637 | 15892633 | 26997  | 0.39 | Y | L | 611567 |
| 3798 | 20 | 20p12.1               | 15904742 | 15908144 | 3403   | 0.08 | Y | L | 611567 |
| 3799 | 20 | 20p12.1               | 15916990 | 15936997 | 20008  | 0.14 | Y | L | 611567 |
| 3800 | 20 | 20p12.1               | 15965144 | 15972225 | 7082   | 0.06 | N | L | 611567 |
| 3801 | 20 | 20p12.1               | 16083936 | 16098149 | 14214  | 0.08 | Y | L |        |
| 3802 | 20 | 20p12.1               | 16333323 | 16357062 | 23740  | 0.14 | N | L |        |
| 3803 | 20 | 20p12.1               | 16498066 | 16510000 | 11935  | 0.14 | Y | L |        |
| 3804 | 20 | 20p12.1               | 16670925 | 16736148 | 65224  | 0.36 | Y | L | 606067 |
| 3805 | 20 | 20p12.1               | 17065683 | 17080652 | 14970  | 0.20 | N | L |        |
| 3806 | 20 | 20p11.23              | 18813619 | 18858793 | 45175  | 0.11 | N | L |        |
| 3807 | 20 | 20p11.23              | 20107625 | 20132768 | 25144  | 0.06 | N | L |        |
| 3808 | 20 | 20p11.23              | 20901310 | 20927637 | 26328  | 0.14 | N | C |        |
| 3809 | 20 | 20p11.22-<br>20p11.21 | 22282741 | 22364829 | 82089  | 0.39 | N | L |        |
| 3810 | 20 | 20p11.21              | 22634965 | 22644176 | 9212   | 0.06 | Y | L |        |
| 3811 | 20 | 20p11.21              | 23297749 | 23306509 | 8761   | 0.06 | N | L | 611270 |
| 3812 | 20 | 20q11.1               | 28086329 | 28132821 | 46493  | 0.11 | Y | L |        |
| 3813 | 20 | 20q11.23              | 36093243 | 36131210 | 37968  | 0.81 | N | L |        |
| 3814 | 20 | 20q12                 | 37460617 | 37482317 | 21701  | 0.06 | N | L |        |
| 3815 | 20 | 20q12                 | 37488429 | 37506650 | 18222  | 0.08 | Y | L |        |
| 3816 | 20 | 20q12                 | 37742521 | 37850081 | 107561 | 0.25 | N | L |        |
| 3817 | 20 | 20q12                 | 37938092 | 37998765 | 60674  | 0.70 | N | L |        |
| 3818 | 20 | 20q12                 | 38055695 | 38086154 | 30460  | 0.64 | Y | L |        |
| 3819 | 20 | 20q12                 | 38109388 | 38137600 | 28213  | 0.06 | N | C |        |
| 3820 | 20 | 20q12                 | 38244320 | 38282997 | 38678  | 0.17 | Y | L |        |
| 3821 | 20 | 20q12                 | 39520607 | 39573740 | 53134  | 0.08 | N | L |        |
| 3822 | 20 | 20q12                 | 40615044 | 40775844 | 160801 | 0.25 | Y | L | 608712 |
| 3823 | 20 | 20q13.13              | 45959972 | 45972659 | 12688  | 0.06 | Y | L |        |
| 3824 | 20 | 20q13.13              | 46387372 | 46412462 | 25091  | 0.08 | Y | C |        |
| 3825 | 20 | 20q13.2               | 50406505 | 50428459 | 21955  | 0.42 | N | L |        |
| 3826 | 20 | 20q13.2               | 50488757 | 50578819 | 90063  | 0.06 | N | L |        |
| 3827 | 20 | 20q13.2               | 50692583 | 50701824 | 9242   | 0.06 | N | L |        |
| 3828 | 20 | 20q13.2               | 50819099 | 50868583 | 49485  | 0.17 | Y | L |        |
| 3829 | 20 | 20q13.33              | 60553932 | 60593318 | 39387  | 0.14 | Y | L |        |
| 3830 | 20 | 20q13.33              | 61790652 | 61794960 | 4309   | 0.28 | Y | C | 608833 |
| 3831 | 21 | 21q11.2               | 13267540 | 13496447 | 228908 | 0.08 | Y | L |        |
| 3832 | 21 | 21q11.2               | 13795440 | 13832601 | 37162  | 2.38 | Y | G |        |
| 3833 | 21 | 21q11.2               | 14526944 | 14560469 | 33526  | 0.17 | N | C |        |
| 3834 | 21 | 21q21.1               | 15336645 | 15354706 | 18062  | 0.06 | N | L |        |
| 3835 | 21 | 21q21.1               | 16082240 | 16099145 | 16906  | 0.20 | N | L | 604736 |
| 3836 | 21 | 21q21.1               | 16733806 | 16759699 | 25894  | 0.06 | Y | L |        |
| 3837 | 21 | 21q21.1               | 17080557 | 17100418 | 19862  | 0.28 | Y | L |        |
| 3838 | 21 | 21q21.1               | 17127561 | 17139470 | 11910  | 0.17 | Y | L |        |



|      |    |          |          |          |        |       |   |   |        |        |                                                                |
|------|----|----------|----------|----------|--------|-------|---|---|--------|--------|----------------------------------------------------------------|
| 3839 | 21 | 21q21.1  | 17268238 | 17308905 | 40668  | 0.45  | Y | L |        |        |                                                                |
| 3840 | 21 | 21q21.1  | 17432180 | 17533597 | 101418 | 0.70  | Y | L |        |        |                                                                |
| 3841 | 21 | 21q21.1  | 17775602 | 17790090 | 14489  | 0.06  | Y | L |        |        |                                                                |
| 3842 | 21 | 21q21.1  | 17899238 | 17903847 | 4610   | 0.36  | N | L | 605674 |        |                                                                |
| 3843 | 21 | 21q21.1  | 18318933 | 18348229 | 29297  | 0.56  | Y | L |        |        |                                                                |
| 3844 | 21 | 21q21.1  | 18587415 | 18614569 | 27155  | 0.08  | Y | L | 606635 | 606635 | Enterokinase deficiency, 226200 (3)                            |
| 3845 | 21 | 21q21.1  | 18792169 | 18829403 | 37235  | 0.36  | Y | L |        |        |                                                                |
| 3846 | 21 | 21q21.1  | 18887676 | 18945527 | 57852  | 2.74  | Y | L |        |        |                                                                |
| 3847 | 21 | 21q21.1  | 19293300 | 19301732 | 8433   | 0.06  | Y | L |        |        |                                                                |
| 3848 | 21 | 21q21.1  | 19992071 | 20044974 | 52904  | 0.64  | Y | L |        |        |                                                                |
| 3849 | 21 | 21q21.1  | 20045669 | 20082901 | 37233  | 0.25  | Y | L |        |        |                                                                |
| 3850 | 21 | 21q21.1  | 21108259 | 21128319 | 20061  | 0.06  | Y | C |        |        |                                                                |
| 3851 | 21 | 21q21.1  | 21431007 | 21440115 | 9109   | 0.17  | Y | L | 602040 |        |                                                                |
| 3852 | 21 | 21q21.1  | 21578187 | 21590333 | 12147  | 0.25  | N | L | 602040 |        |                                                                |
| 3853 | 21 | 21q21.1  | 21884681 | 21919180 | 34500  | 0.34  | N | L |        |        |                                                                |
| 3854 | 21 | 21q21.1  | 22050321 | 22077730 | 27410  | 1.76  | Y | L |        |        |                                                                |
| 3855 | 21 | 21q21.1  | 22104559 | 22113405 | 8847   | 0.06  | Y | L |        |        |                                                                |
| 3856 | 21 | 21q21.1  | 22142443 | 22894194 | 751752 | 10.98 | Y | L |        |        |                                                                |
| 3857 | 21 | 21q21.2  | 23321135 | 23340677 | 19543  | 0.34  | Y | L |        |        |                                                                |
| 3858 | 21 | 21q21.2  | 23522511 | 23547586 | 25076  | 0.56  | Y | L |        |        |                                                                |
| 3859 | 21 | 21q21.2  | 24386071 | 24418501 | 32431  | 0.08  | Y | L |        |        |                                                                |
| 3860 | 21 | 21q21.2  | 24483197 | 24484357 | 1161   | 0.08  | Y | G |        |        |                                                                |
| 3861 | 21 | 21q21.2  | 24521325 | 24561563 | 40239  | 0.28  | N | L |        |        |                                                                |
| 3862 | 21 | 21q21.2  | 24992598 | 25016264 | 23667  | 0.20  | N | L |        |        |                                                                |
| 3863 | 21 | 21q21.2  | 25508368 | 25527855 | 19488  | 0.06  | N | L |        |        |                                                                |
| 3864 | 21 | 21q21.3  | 26110672 | 26156850 | 46179  | 0.70  | Y | L |        |        |                                                                |
| 3865 | 21 | 21q21.3  | 26742195 | 26779877 | 37683  | 0.14  | N | L |        |        |                                                                |
| 3866 | 21 | 21q21.3  | 27200411 | 27213326 | 12916  | 0.06  | N | C | 605007 |        |                                                                |
| 3867 | 21 | 21q21.3  | 28408125 | 28431800 | 23676  | 0.50  | N | L |        |        |                                                                |
| 3868 | 21 | 21q21.3  | 28524455 | 28547475 | 23021  | 0.39  | N | L |        |        |                                                                |
| 3869 | 21 | 21q21.3  | 28617267 | 28651740 | 34474  | 0.42  | Y | L |        |        |                                                                |
| 3870 | 21 | 21q21.3  | 29052415 | 29062705 | 10291  | 0.08  | N | L |        |        |                                                                |
| 3871 | 21 | 21q21.3  | 29911671 | 29926665 | 14995  | 0.64  | N | L | 138245 |        |                                                                |
| 3872 | 21 | 21q21.3  | 30094186 | 30129589 | 35404  | 0.25  | N | L | 138245 |        |                                                                |
| 3873 | 21 | 21q21.3  | 30175351 | 30178918 | 3568   | 0.06  | N | L | 138245 |        |                                                                |
| 3874 | 21 | 21q22.11 | 33186255 | 33204761 | 18507  | 0.08  | N | L |        |        |                                                                |
| 3875 | 21 | 21q22.12 | 35920022 | 35933826 | 13805  | 0.39  | N | G |        |        |                                                                |
| 3876 | 21 | 21q22.13 | 37262502 | 37307660 | 45159  | 0.11  | Y | L | 609018 | 609018 | Holocarboxylase synthetase deficiency, 253270 (3)              |
| 3877 | 21 | 21q22.2  | 38829307 | 38843599 | 14293  | 0.20  | Y | L |        |        |                                                                |
| 3878 | 21 | 21q22.2  | 39461660 | 39492832 | 31173  | 0.06  | N | L | 605296 |        |                                                                |
| 3879 | 21 | 21q22.2  | 40842165 | 40974574 | 132410 | 0.08  | N | L | 602523 |        |                                                                |
| 3880 | 21 | 21q22.3  | 41670518 | 41687069 | 16552  | 0.06  | N | L | 147890 |        |                                                                |
| 3881 | 21 | 21q22.3  | 45492286 | 45496074 | 3789   | 0.14  | N | L |        |        |                                                                |
| 3882 | 22 | 22q11.1  | 14433758 | 15042100 | 608343 | 1.09  | Y | C | 608913 |        |                                                                |
| 3883 | 22 | 22q11.21 | 16474915 | 16486662 | 11748  | 0.31  | Y | L | 108746 |        |                                                                |
| 3884 | 22 | 22q11.21 | 17052138 | 17386984 | 334847 | 0.25  | Y | L | 601279 |        |                                                                |
| 3885 | 22 | 22q11.21 | 17638448 | 17664426 | 25979  | 0.14  | Y | L | 601273 |        |                                                                |
| 3886 | 22 | 22q11.21 | 17947776 | 17962066 | 14291  | 2.15  | Y | L |        |        |                                                                |
| 3887 | 22 | 22q11.21 | 18683016 | 19043659 | 360644 | 25.32 | Y | C | 609459 |        |                                                                |
| 3888 | 22 | 22q11.21 | 19275445 | 19286210 | 10766  | 2.24  | Y | L |        |        |                                                                |
| 3889 | 22 | 22q11.21 | 20374717 | 20393337 | 18621  | 0.06  | Y | L | 607588 |        |                                                                |
| 3890 | 22 | 22q11.22 | 20729482 | 20835347 | 105866 | 1.70  | Y | C |        |        |                                                                |
| 3891 | 22 | 22q11.22 | 20848533 | 20859088 | 10556  | 0.14  | Y | G |        |        |                                                                |
| 3892 | 22 | 22q11.22 | 21079787 | 21163362 | 83576  | 0.06  | Y | L |        |        |                                                                |
| 3893 | 22 | 22q11.22 | 21403522 | 21440841 | 37320  | 0.11  | Y | C |        |        |                                                                |
| 3894 | 22 | 22q11.22 | 21462062 | 21586779 | 124718 | 0.53  | Y | C |        |        |                                                                |
| 3895 | 22 | 22q11.22 | 21588369 | 21591946 | 3578   | 0.06  | Y | L |        |        |                                                                |
| 3896 | 22 | 22q11.23 | 22230461 | 22248464 | 18004  | 0.14  | Y | L | 601495 |        |                                                                |
| 3897 | 22 | 22q11.23 | 22259506 | 22309527 | 50022  | 0.06  | Y | L |        |        |                                                                |
| 3898 | 22 | 22q11.23 | 22601645 | 22734830 | 133186 | 84.10 | Y | C | 600437 |        |                                                                |
| 3899 | 22 | 22q11.23 | 23994667 | 24254612 | 259946 | 2.12  | Y | C |        |        |                                                                |
| 3900 | 22 | 22q12.1  | 24827371 | 24847339 | 19969  | 0.06  | Y | L |        |        |                                                                |
| 3901 | 22 | 22q12.1  | 24963558 | 24969608 | 6051   | 0.28  | Y | L | 607021 |        |                                                                |
| 3902 | 22 | 22q12.1  | 27189133 | 27273477 | 84345  | 0.14  | N | L |        |        |                                                                |
| 3903 | 22 | 22q12.2  | 28200354 | 28214325 | 13972  | 0.08  | Y | G | 162230 | 162230 | {Amyotrophic lateral sclerosis, susceptibility to}, 105400 (3) |
| 3904 | 22 | 22q12.2  | 28897907 | 28910161 | 12255  | 0.11  | N | L |        |        |                                                                |

|      |    |               |           |           |        |       |   |   |        |        |                                   |
|------|----|---------------|-----------|-----------|--------|-------|---|---|--------|--------|-----------------------------------|
| 3905 | 22 | 22q12.3       | 31260263  | 31883809  | 623547 | 0.06  | N | L | 602705 |        |                                   |
| 3906 | 22 | 22q12.3       | 32234676  | 32265350  | 30675  | 0.06  | Y | L | 608840 |        |                                   |
| 3907 | 22 | 22q12.3       | 32526508  | 32687092  | 160585 | 0.08  | Y | L | 608840 |        |                                   |
| 3908 | 22 | 22q12.3       | 32955784  | 32986814  | 31031  | 0.61  | N | L |        |        |                                   |
| 3909 | 22 | 22q12.3       | 33460891  | 33497444  | 36554  | 0.50  | N | L |        |        |                                   |
| 3910 | 22 | 22q12.3       | 33703861  | 33728839  | 24979  | 0.17  | Y | L |        |        |                                   |
| 3911 | 22 | 22q13.1       | 37617105  | 37629994  | 12890  | 0.75  | Y | L |        |        |                                   |
| 3912 | 22 | 22q13.1       | 37679290  | 37719364  | 40075  | 11.10 | Y | C | 607109 |        |                                   |
| 3913 | 22 | 22q13.1       | 37739396  | 37779550  | 40155  | 0.06  | N | G | 607750 |        |                                   |
| 3914 | 22 | 22q13.2       | 39447387  | 39453222  | 5836   | 0.08  | N | L |        |        |                                   |
| 3915 | 22 | 22q13.2       | 40851972  | 40869378  | 17407  | 0.67  | Y | C | 124030 | 124030 | {Codeine sensitivity}, 608902 (3) |
| 3916 | 22 | 22q13.2       | 41227152  | 41292094  | 64943  | 0.53  | Y | C | 607979 |        |                                   |
| 3917 | 22 | 22q13.31      | 43117070  | 43139648  | 22579  | 0.06  | N | L |        |        |                                   |
| 3918 | 22 | 22q13.31      | 44009173  | 44041577  | 32405  | 0.59  | Y | L |        |        |                                   |
| 3919 | 22 | 22q13.31      | 44147909  | 44165403  | 17495  | 0.06  | Y | L | 608685 |        |                                   |
| 3920 | 22 | 22q13.31      | 46882928  | 46892480  | 9553   | 0.06  | Y | L |        |        |                                   |
| 3921 | 22 | 22q13.33      | 48215722  | 48221618  | 5897   | 0.06  | Y | L |        |        |                                   |
| 3922 | X  | Xp22.33       | 142664    | 502185    | 359522 | 0.06  | Y | C | 300124 |        |                                   |
| 3923 | X  | Xp22.33       | 735289    | 942950    | 207662 | 0.11  | Y | L |        |        |                                   |
| 3924 | X  | Xp22.33       | 1810595   | 1976718   | 166124 | 0.06  | Y | G |        |        |                                   |
| 3925 | X  | Xp22.33       | 2713391   | 2825120   | 111730 | 0.25  | Y | L | 314700 | 314700 | [Blood group, XG system] (3)      |
| 3926 | X  | Xp22.32       | 5348648   | 5523492   | 174845 | 0.06  | Y | L |        |        |                                   |
| 3927 | X  | Xp22.32       | 5682439   | 5721897   | 39459  | 0.11  | N | L |        |        |                                   |
| 3928 | X  | Xp22.2        | 11388684  | 11445550  | 56867  | 0.31  | N | L | 300118 |        |                                   |
| 3929 | X  | Xp22.2        | 14018626  | 14058256  | 39631  | 0.08  | N | L |        |        |                                   |
| 3930 | X  | Xp22.2        | 14324947  | 14394775  | 69829  | 0.34  | N | L |        |        |                                   |
| 3931 | X  | Xp22.12       | 20537463  | 20591913  | 54451  | 0.22  | N | L |        |        |                                   |
| 3932 | X  | Xp22.12       | 21191486  | 21248842  | 57357  | 0.14  | N | L |        |        |                                   |
| 3933 | X  | Xp22.11       | 22830155  | 23017851  | 187697 | 0.22  | Y | L |        |        |                                   |
| 3934 | X  | Xp21.3        | 25748340  | 25781464  | 33125  | 0.11  | N | L |        |        |                                   |
| 3935 | X  | Xp21.3        | 26613161  | 26647443  | 34283  | 0.17  | N | L |        |        |                                   |
| 3936 | X  | Xp21.3        | 28006572  | 28048792  | 42221  | 0.17  | Y | L |        |        |                                   |
| 3937 | X  | Xp21.1        | 33848224  | 33987374  | 139151 | 0.22  | Y | L |        |        |                                   |
| 3938 | X  | Xp21.1        | 34609867  | 34674259  | 64393  | 0.11  | N | L |        |        |                                   |
| 3939 | X  | Xp21.1        | 36578685  | 36647194  | 68510  | 0.08  | Y | L |        |        |                                   |
| 3940 | X  | Xp11.4        | 38252678  | 38278229  | 25552  | 0.14  | N | L |        |        |                                   |
| 3941 | X  | Xp11.4        | 38469593  | 38474949  | 5357   | 0.14  | Y | C |        |        |                                   |
| 3942 | X  | Xp11.3        | 46021772  | 46049231  | 27460  | 0.06  | N | L |        |        |                                   |
| 3943 | X  | Xp11.23       | 47765088  | 47864649  | 99562  | 0.42  | Y | L | 300541 |        |                                   |
| 3944 | X  | Xp11.21       | 55128192  | 55132432  | 4241   | 0.08  | Y | L | 300738 |        |                                   |
| 3945 | X  | Xp11.21       | 55717941  | 55763151  | 45211  | 0.06  | Y | L | 300725 |        |                                   |
| 3946 | X  | Xp11.1        | 56809883  | 56828067  | 18185  | 0.20  | Y | C |        |        |                                   |
| 3947 | X  | Xp11.1        | 58341989  | 58578888  | 236900 | 4.61  | Y | L |        |        |                                   |
| 3948 | X  | Xq11.1        | 61645719  | 61961497  | 315779 | 1.87  | Y | L |        |        |                                   |
| 3949 | X  | Xq11.1        | 63925409  | 63975853  | 50445  | 1.06  | Y | L |        |        |                                   |
| 3950 | X  | Xq11.1        | 64366888  | 64458067  | 91180  | 0.14  | N | L |        |        |                                   |
| 3951 | X  | Xq12          | 65379876  | 65417243  | 37368  | 0.08  | N | L | 300167 |        |                                   |
| 3952 | X  | Xq12          | 65488797  | 65536798  | 48002  | 0.06  | N | L |        |        |                                   |
| 3953 | X  | Xq12          | 66011685  | 66050975  | 39291  | 0.31  | N | L |        |        |                                   |
| 3954 | X  | Xq12          | 66170371  | 66192103  | 21733  | 0.17  | Y | L |        |        |                                   |
| 3955 | X  | Xq12          | 66258393  | 66320385  | 61993  | 0.92  | Y | L |        |        |                                   |
| 3956 | X  | Xq13.2        | 72707266  | 72734682  | 27417  | 0.17  | Y | L |        |        |                                   |
| 3957 | X  | Xq13.3-Xq21.1 | 75923157  | 76030016  | 106860 | 0.06  | Y | L |        |        |                                   |
| 3958 | X  | Xq21.1        | 76048197  | 76054930  | 6734   | 0.06  | Y | G |        |        |                                   |
| 3959 | X  | Xq21.1        | 79986275  | 80060596  | 74322  | 0.08  | Y | L |        |        |                                   |
| 3960 | X  | Xq21.1        | 80727972  | 80794414  | 66443  | 0.08  | N | L |        |        |                                   |
| 3961 | X  | Xq21.1        | 81223390  | 81277332  | 53943  | 0.31  | N | L |        |        |                                   |
| 3962 | X  | Xq21.1        | 81346155  | 81429579  | 83425  | 0.36  | N | L |        |        |                                   |
| 3963 | X  | Xq21.1        | 83350417  | 83389664  | 39248  | 0.06  | N | L |        |        |                                   |
| 3964 | X  | Xq21.1-Xq21.2 | 84476162  | 84502588  | 26427  | 0.08  | N | L | 300604 |        |                                   |
| 3965 | X  | Xq21.31       | 86313565  | 86349311  | 35747  | 0.06  | N | L |        |        |                                   |
| 3966 | X  | Xq21.31       | 86698393  | 86719729  | 21337  | 0.06  | N | L | 300348 |        |                                   |
| 3967 | X  | Xq21.33       | 94449538  | 94587397  | 137860 | 0.81  | N | L |        |        |                                   |
| 3968 | X  | Xq21.33       | 97219623  | 97319640  | 100018 | 0.45  | Y | L |        |        |                                   |
| 3969 | X  | Xq21.33       | 98128933  | 98182734  | 53802  | 0.11  | Y | L |        |        |                                   |
| 3970 | X  | Xq22.1        | 98782873  | 98855639  | 72767  | 1.65  | Y | L |        |        |                                   |
| 3971 | X  | Xq22.1        | 98892069  | 98924937  | 32869  | 0.06  | Y | L |        |        |                                   |
| 3972 | X  | Xq22.1        | 100757969 | 100766651 | 8683   | 0.14  | N | C | 300364 |        |                                   |
| 3973 | X  | Xq22.2        | 103135577 | 103145644 | 10068  | 0.14  | Y | C |        |        |                                   |

|      |   |        |           |           |        |      |   |   |        |        |                                                    |
|------|---|--------|-----------|-----------|--------|------|---|---|--------|--------|----------------------------------------------------|
| 3974 | X | Xq22.3 | 103832981 | 103887585 | 54605  | 0.08 | N | L | 300277 |        |                                                    |
| 3975 | X | Xq22.3 | 104129237 | 104160233 | 30997  | 0.06 | N | L | 300277 |        |                                                    |
| 3976 | X | Xq22.3 | 104831589 | 104888650 | 57062  | 0.39 | Y | L | 300277 |        |                                                    |
| 3977 | X | Xq22.3 | 108493735 | 108524652 | 30918  | 0.22 | N | L | 300041 |        |                                                    |
| 3978 | X | Xq22.3 | 110129404 | 110175558 | 46155  | 0.06 | N | L |        |        |                                                    |
| 3979 | X | Xq23   | 114436678 | 114459187 | 22510  | 0.06 | Y | L | 300616 |        |                                                    |
| 3980 | X | Xq23   | 116742062 | 116774771 | 32710  | 0.34 | N | L |        |        |                                                    |
| 3981 | X | Xq24   | 120351869 | 120592895 | 241027 | 0.31 | Y | L |        |        |                                                    |
| 3982 | X | Xq24   | 120619355 | 120684560 | 65206  | 0.08 | Y | L |        |        |                                                    |
| 3983 | X | Xq25   | 120892831 | 120926712 | 33882  | 0.06 | N | L |        |        |                                                    |
| 3984 | X | Xq25   | 122397281 | 122415252 | 17972  | 0.06 | N | L | 305915 | 305915 | Mental retardation,<br>X-linked 94,<br>300699 (3)  |
| 3985 | X | Xq25   | 126370098 | 126440611 | 70514  | 0.84 | Y | L |        |        |                                                    |
| 3986 | X | Xq25   | 126457560 | 126569592 | 112033 | 0.17 | N | L |        |        |                                                    |
| 3987 | X | Xq25   | 126973679 | 127060007 | 86329  | 0.61 | Y | L | 300487 |        |                                                    |
| 3988 | X | Xq25   | 127883882 | 128002738 | 118857 | 0.14 | N | L |        |        |                                                    |
| 3989 | X | Xq26.1 | 130149368 | 130194842 | 45475  | 0.36 | N | L |        |        |                                                    |
| 3990 | X | Xq26.2 | 131556882 | 131621123 | 64242  | 0.06 | N | L | 300545 |        |                                                    |
| 3991 | X | Xq26.3 | 134651935 | 134685377 | 33443  | 0.06 | Y | C | 300648 |        |                                                    |
| 3992 | X | Xq26.3 | 137237561 | 137363374 | 125814 | 0.08 | Y | L |        |        |                                                    |
| 3993 | X | Xq26.3 | 137632858 | 137669974 | 37117  | 0.11 | N | L |        |        |                                                    |
| 3994 | X | Xq27.2 | 140181127 | 140622558 | 441432 | 0.17 | Y | L | 300493 |        |                                                    |
| 3995 | X | Xq27.3 | 142102452 | 142133308 | 30857  | 0.45 | N | L |        |        |                                                    |
| 3996 | X | Xq27.3 | 142570097 | 142585496 | 15400  | 0.06 | N | L |        |        |                                                    |
| 3997 | X | Xq27.3 | 142691161 | 142729557 | 38397  | 0.06 | N | G |        |        |                                                    |
| 3998 | X | Xq27.3 | 145736974 | 145746580 | 9607   | 0.08 | N | L |        |        |                                                    |
| 3999 | X | Xq28   | 147303657 | 147329420 | 25764  | 0.20 | Y | L |        |        |                                                    |
| 4000 | X | Xq28   | 147491044 | 147523675 | 32632  | 0.25 | N | L | 309548 | 309548 | Mental retardation,<br>X-linked, FRAXE<br>type (3) |
| 4001 | X | Xq28   | 147756803 | 147780915 | 24113  | 0.08 | N | L | 309548 | 309548 | Mental retardation,<br>X-linked, FRAXE<br>type (3) |
| 4002 | X | Xq28   | 152156942 | 152165162 | 8221   | 0.06 | Y | L |        |        |                                                    |
| 4003 | X | Xq28   | 153260429 | 153276505 | 16077  | 0.06 | Y | C | 310300 |        |                                                    |

\*CNVRs identified as gain regions are marked as 'G', loss as 'L', and complex regions with gain and loss as 'C'.

\*\*OMIM gene ID which overlaps the CNVR in this study is identified from the OMIM gene table.

\*\*\*OMIM Morbid Map ID and the phenotype in the last column come from the OMIM Morbid Map table.

**Supplementary Table S2.****Genomic qPCR validation of the CNVs identified in Koreans**

| Chr | Cyto    | Start     | End       | CNV status | Mean qPCR ratio (SD) <sup>+</sup> | No of subjects* | Validation <sup>++</sup> |
|-----|---------|-----------|-----------|------------|-----------------------------------|-----------------|--------------------------|
| 1   | 1p31.1  | 71760084  | 71779585  | Loss       | 0.52 (0.02)                       | 2               | consistent               |
| 1   | 1p13.3  | 110029506 | 110035176 | Gain       | 2.43 (0.87)                       | 15              | consistent               |
| 1   | 1q21.3  | 150839393 | 150842593 | Gain       | 1.70 (0.24)                       | 6               | consistent               |
| 1   | 1q24.3  | 170355199 | 170518144 | Loss       | 1.06 (0.1)                        | 6               | inconsistent             |
| 1   | 1q31.3  | 196970527 | 196989692 | Loss       | 0.58 (0.07)                       | 2               | consistent               |
| 2   | 2q22.1  | 141478435 | 141490367 | Loss       | 0.68 (0.05)                       | 3               | consistent               |
| 3   | 3p22.3  | 36112088  | 36169510  | Loss       | 0.79 (0.01)                       | 2               | consistent               |
| 4   | 4q21.1  | 78400677  | 78406561  | Loss       | 0.63 (0.02)                       | 2               | consistent               |
| 4   | 4q25    | 112577880 | 112586942 | Loss       | 1.00 (0.05)                       | 10              | inconsistent             |
| 5   | 5q14.3  | 89251989  | 89264891  | Loss       | 0.53 (0.04)                       | 8               | consistent               |
| 5   | 5q14.3  | 89269870  | 89275736  | Loss       | 0.64 (0.05)                       | 8               | consistent               |
| 6   | 6p21.32 | 32563997  | 32568514  | Gain       | 1.26 (0.03)                       | 5               | consistent               |
| 7   | 7p21.3  | 11704427  | 11719807  | Loss       | 0.60 (0.04)                       | 24              | consistent               |
| 10  | 10q21.3 | 66701909  | 66784393  | Loss       | 0.77 (0.02)                       | 2               | consistent               |
| 11  | 11p15.5 | 1894489   | 1896405   | Gain       | 1.49 (0.11)                       | 10              | consistent               |
| 15  | 15q14   | 32530909  | 32538112  | Gain       | 1.95 (0.17)                       | 5               | consistent               |

\*Number of subjects for qPCR validation

<sup>+</sup>If qPCR intensity ratio is lower than 0.8, it is considered as 'loss' and if it is higher than 1.2, it is classified as 'gain'.<sup>++</sup>If a CNV call agrees with the result of qPCR, it is considered as consistent. Otherwise, inconsistent.**Primers for 16 CNV loci and internal control**

| Chr | Cytoband                  | Primers                   |                          |
|-----|---------------------------|---------------------------|--------------------------|
|     |                           | Forward                   | Reverse                  |
| 1   | 1p31.1                    | TATGTTGCGTGCAGGATCCACTCT  | ATCCTCATCTAGCCCTGTGTGCAA |
| 1   | 1p13.3                    | TGCAACGTGTCTCTGACTGCATCT  | TGTCACATGAACGAATGCAGGTGG |
| 1   | 1q21.3                    | AAGTGGCCACCCAAGAGTAGTTCA  | AAAGAGGGTGGCTCTGAATGTGGA |
| 1   | 1q24.3                    | AGTGGTCATAGCAGGGTGAATGCT  | AAGCACCTGTGGTAATCTGGACA  |
| 1   | 1q31.3                    | TACAAGGGCGAGTAGGGCAAAGAA  | TGGCAATCTTACTGCCTCTGCCTA |
| 2   | 2q22.1                    | TTAGCCTCTGTGCCTGGCTATTGA  | ACACACCATCTGACAAGACCACCA |
| 3   | 3p22.3                    | GCACTACAGAGAATTTGCAGGGCA  | TTGCAGAAAGAACTCCCAGTGACC |
| 4   | 4q21.1                    | ATTAGCTACTGGCAGGTTTCAGGCA | TGCTCCATAGGCCCATGAGTTCTT |
| 4   | 4q25                      | TTAGCCGATACCAGTACAAGCCAG  | ATGCATTCAATATGGCCTGGCAGC |
| 5   | 5q14.3                    | GCCCTTAACCAGGCTTTGCTGTTT  | TGGCTCCATCAGTGGTTGTGATGA |
| 5   | 5q14.3                    | ATGGGAAGAAGGCTCAGGACAAA   | AGGCCATCGGTGTATGTATGTGCT |
| 6   | 6p21.32                   | TCAGACACACCATGCTGGAGAACA  | TCCAACACGAGAGTACCCAAACCA |
| 7   | 7p21.3                    | ACAGCAGTCACAGTGGGAAGGTAA  | AGCTCCATAACTGAGAGGCAGCAA |
| 10  | 10q21.3                   | AGCACAATGTCCTGAGGCTTCCTT  | TGAATGCCTGATGACTGAGCCTT  |
| 11  | 11p15.5                   | ATTCCCTTCCCTGCCTCTTCCACT  | TCTTGCTCATGTCTCCAGCCACAA |
| 15  | 15q14                     | TATGGCAGGGAAGAAAGGAAGCCA  | GCAGCCATCAACCAATAACTGCCA |
|     | Internal Control (HS6ST3) | CGCTACCACCACACCAAGCAG     | CCACCTGGCTGTTGTAGTCTCTC  |

**Supplementary Table S3.**

Genomic qPCR validation of the CNVs identified from NA10851 vs NA15510 triplicate analysis (2.8MAD threshold and 1MAD cutoff)

| Chr | Cyto    | Start     | End       | Frequency* | CNV status | qPCR availability | qPCR ratio <sup>+</sup> | Validation <sup>++</sup> |
|-----|---------|-----------|-----------|------------|------------|-------------------|-------------------------|--------------------------|
| 1   | 1p36.21 | 12795973  | 12808993  | 1          | Loss       | Available         | 0.847                   | inconsistent             |
| 1   | 1q21.1  | 147329553 | 147333908 | 2          | Gain       | Unavailable       |                         |                          |
| 1   | 1q21.1  | 147349261 | 147353783 | 2          | Gain       | Unavailable       |                         |                          |
| 1   | 1q21.1  | 147377443 | 147382775 | 1          | Gain       | Unavailable       |                         |                          |
| 1   | 1q21.3  | 150822293 | 150827208 | 1          | Loss       | Unavailable       |                         |                          |
| 1   | 1q21.3  | 150830767 | 150852980 | 9          | Loss       | Available         | 0.025                   | consistent               |
| 1   | 1q23.3  | 161331107 | 161353123 | 4          | Gain       | Available         | 1.205                   | consistent               |
| 1   | 1q31.3  | 193282226 | 193295393 | 2          | Loss       | Available         | 1.473                   | inconsistent             |
| 1   | 1q41    | 214791741 | 214812222 | 2          | Loss       | Available         | 0.899                   | inconsistent             |
| 1   | 1q42.2  | 232123846 | 232142044 | 2          | Loss       | Unavailable       |                         |                          |
| 2   | 2p22.3  | 34570453  | 34590092  | 1          | Gain       | Unavailable       |                         |                          |
| 2   | 2p11.2  | 89059260  | 89084703  | 9          | Gain       | Available         | 34.500                  | consistent               |
| 2   | 2p11.2  | 89141315  | 89173765  | 1          | Gain       | Unavailable       |                         |                          |
| 2   | 2p11.2  | 89265876  | 89282326  | 2          | Gain       | Available         | 4.000                   | consistent               |
| 2   | 2p11.2  | 89868728  | 89877144  | 2          | Gain       | Unavailable       |                         |                          |
| 2   | 2q11.2  | 96005278  | 96036405  | 1          | Loss       | Available         | 0.893                   | inconsistent             |
| 2   | 2q11.2  | 100258948 | 100275519 | 4          | Loss       | Available         | 1.102                   | inconsistent             |
| 2   | 2q22.3  | 146577746 | 146590130 | 1          | Loss       | Unavailable       |                         |                          |
| 3   | 3p23    | 31929048  | 31945625  | 1          | Gain       | Available         | 8.187                   | consistent               |
| 3   | 3p14.1  | 67205576  | 67215541  | 1          | Loss       | Available         | 0.661                   | consistent               |
| 3   | 3p14.1  | 68824403  | 68830109  | 7          | Loss       | Available         | 0.000                   | consistent               |
| 3   | 3q29    | 195861808 | 195862969 | 2          | Gain       | Available         | 1.045                   | inconsistent             |
| 4   | 4p15.1  | 34489079  | 34508226  | 1          | Gain       | Available         | 1.941                   | consistent               |
| 4   | 4q13.1  | 59951791  | 59984714  | 1          | Loss       | Available         | 1.023                   | inconsistent             |
| 4   | 4q13.2  | 69057536  | 69166582  | 9          | Gain       | Available         | 2.030                   | consistent               |
| 4   | 4q32.3  | 169050847 | 169057999 | 2          | Gain       | Available         | 2.745                   | consistent               |
| 4   | 4q32.3  | 169168495 | 169183832 | 1          | Gain       | Unavailable       |                         |                          |
| 4   | 4q34.3  | 181781397 | 181793798 | 1          | Loss       | Available         | 0.760                   | consistent               |
| 5   | 5q35.3  | 180311316 | 180350266 | 5          | Loss       | Available         | 0.048                   | consistent               |
| 6   | 6p21.33 | 31487910  | 31500898  | 1          | Loss       | Unavailable       |                         |                          |
| 6   | 6p21.33 | 31508855  | 31544618  | 5          | Loss       | Unavailable       |                         |                          |
| 6   | 6p21.32 | 32610691  | 32625672  | 5          | Loss       | Available         | 0.443                   | consistent               |
| 6   | 6q14.1  | 77073713  | 77083510  | 2          | Loss       | Available         | 0.557                   | consistent               |
| 6   | 6q14.1  | 77496587  | 77499919  | 1          | Gain       | Available         | 2.135                   | consistent               |
| 6   | 6q14.1  | 79052304  | 79068748  | 2          | Gain       | Available         | 1.879                   | consistent               |
| 7   | 7p22.2  | 3576829   | 3580193   | 1          | Gain       | Available         | 1.832                   | consistent               |
| 7   | 7q33    | 133435837 | 133448649 | 9          | Gain       | Available         | 15300                   | consistent               |

|    |          |           |           |   |      |             |          |              |
|----|----------|-----------|-----------|---|------|-------------|----------|--------------|
| 7  | 7q36.2   | 154024148 | 154031763 | 2 | Gain | Unavailable |          |              |
| 8  | 8p23.1   | 12264620  | 12321649  | 9 | Loss | Available   | 0.038    | consistent   |
| 8  | 8p11.23  | 39418698  | 39453565  | 2 | Gain | Available   | 1.409321 | consistent   |
| 8  | 8p11.23  | 39475534  | 39488920  | 1 | Gain | Unavailable |          |              |
| 9  | 9p24.1   | 6653234   | 6660448   | 9 | Loss | Available   | 0.000    | consistent   |
| 9  | 9p21.3   | 23356378  | 23363976  | 4 | Loss | Available   | 0.472    | consistent   |
| 9  | 9p11.2   | 44668158  | 44728735  | 7 | Loss | Available   | 0.404    | consistent   |
| 9  | 9q34.3   | 137349180 | 137356063 | 4 | Gain | Unavailable |          |              |
| 10 | 10q11.22 | 47117276  | 47131895  | 1 | Loss | Available   | 0.521    | consistent   |
| 10 | 10q21.1  | 56127179  | 56137663  | 1 | Loss | Available   | 0.611    | consistent   |
| 11 | 11p15.4  | 4925685   | 4932788   | 2 | Loss | Available   | 0.497    | consistent   |
| 11 | 11p15.1  | 18905563  | 18918255  | 9 | Gain | Available   | 51.150   | consistent   |
| 11 | 11q11    | 55117835  | 55209409  | 9 | Loss | Available   | 0.348    | consistent   |
| 11 | 11q22.1  | 96807894  | 96819588  | 1 | Gain | Available   | 1.111    | inconsistent |
| 11 | 11q22.1  | 98495468  | 98501874  | 1 | Loss | Unavailable |          |              |
| 11 | 11q22.3  | 106373659 | 106383869 | 1 | Loss | Available   | 0.927    | inconsistent |
| 12 | 12p13.31 | 9529191   | 9604941   | 9 | Gain | Available   | 2.325    | consistent   |
| 12 | 12q12    | 37649999  | 37657882  | 1 | Gain | Available   | 0.887    | inconsistent |
| 12 | 12q14.1  | 56991500  | 57007411  | 1 | Gain | Available   | 1.097    | inconsistent |
| 12 | 12q15    | 68164983  | 68175151  | 1 | Loss | Unavailable |          |              |
| 13 | 13q21.33 | 68151581  | 68166243  | 2 | Loss | Available   | 0.480    | consistent   |
| 13 | 13q21.33 | 69634065  | 69643614  | 1 | Gain | Available   | 1.823    | consistent   |
| 14 | 14q32.33 | 105317573 | 105413675 | 9 | Loss | Available   | 0.086    | consistent   |
| 14 | 14q32.33 | 105982594 | 105989708 | 2 | Loss | Unavailable |          |              |
| 14 | 14q32.33 | 106014913 | 106022782 | 1 | Loss | Available   | 0.400    | consistent   |
| 15 | 15q11.2  | 19164827  | 19181702  | 1 | Gain | Available   | 1.798    | consistent   |
| 15 | 15q11.2  | 19822478  | 19856526  | 7 | Gain | Available   | 3.355    | consistent   |
| 15 | 15q11.2  | 19886365  | 19911396  | 1 | Gain | Unavailable |          |              |
| 15 | 15q11.2  | 19915944  | 19936532  | 3 | Gain | Available   | 3.170    | consistent   |
| 15 | 15q11.2  | 19970276  | 20077554  | 7 | Gain | Available   | 2.730    | consistent   |
| 15 | 15q12    | 24988049  | 24991006  | 1 | Gain | Available   | 1.705    | consistent   |
| 16 | 16q12.2  | 54354048  | 54374147  | 4 | Loss | Available   | 0.601    | consistent   |
| 17 | 17p13.1  | 9208010   | 9213523   | 1 | Gain | Available   | 1.146    | inconsistent |
| 17 | 17p11.2  | 18241321  | 18310478  | 2 | Gain | Available   | 1.266    | consistent   |
| 17 | 17q12    | 31463252  | 31620417  | 8 | Gain | Available   | 3.330    | consistent   |
| 17 | 17q21.2  | 36662283  | 36683751  | 4 | Loss | Available   | 0.000    | consistent   |
| 18 | 18q22.1  | 60410721  | 60442384  | 1 | Loss | Available   | 0.746    | consistent   |
| 18 | 18q22.1  | 62058576  | 62063122  | 9 | Loss | Available   | 0.000    | consistent   |
| 19 | 19p12    | 22631934  | 22641195  | 1 | Loss | Available   | 0.827    | consistent   |
| 19 | 19q13.42 | 59431750  | 59437881  | 2 | Loss | Available   | 0.338    | consistent   |
| 19 | 19q13.42 | 59487164  | 59502901  | 1 | Gain | Available   | 2.370    | consistent   |

|    |          |          |          |   |      |             |       |            |
|----|----------|----------|----------|---|------|-------------|-------|------------|
| 20 | 20p12.1  | 14755161 | 14860223 | 9 | Loss | Available   | 0.554 | consistent |
| 20 | 20p12.1  | 14862709 | 14872305 | 1 | Loss | Available   | 0.456 | consistent |
| 22 | 22q11.22 | 20815776 | 20820837 | 2 | Gain | Unavailable |       |            |
| 22 | 22q11.22 | 20833634 | 20848533 | 1 | Gain | Unavailable |       |            |
| 22 | 22q11.22 | 20926485 | 20932816 | 1 | Gain | Available   | 2.335 | consistent |
| 22 | 22q11.22 | 21000103 | 21014397 | 3 | Gain | Available   | 1.436 | consistent |
| 22 | 22q11.22 | 21421371 | 21431798 | 2 | Gain | Available   | 1.676 | consistent |
| 22 | 22q11.22 | 21482800 | 21581602 | 9 | Gain | Available   | 8.285 | consistent |
| 22 | 22q11.23 | 22613097 | 22625721 | 9 | Loss | Available   | 0.100 | consistent |
| 22 | 22q11.23 | 22680056 | 22726623 | 9 | Gain | Available   | 2.600 | consistent |

\*Frequency: CNV call frequency out of 9 pairwise comparisons with triplicate genotypes.

+qPCR ratio: If qPCR intensity ratio (NA10851/NA15510) is lower than 0.8, it is considered as 'loss' and if it is higher than 1.2, it is classified as 'gain'.

\*\*Validation: If a CNV call agrees with the result of qPCR, it is considered as consistent. Otherwise, inconsistent.

Cyto: cytoband

Genomic qPCR validation of the CNVs identified from NA10851 vs NA15510 triplicate analysis (3MAD threshold and 5MAD cutoff)

| Chr | Cyto     | Start     | End       | Frequency | CNV status | qPCR availability | qPCR ratio | Validation   |
|-----|----------|-----------|-----------|-----------|------------|-------------------|------------|--------------|
| 1   | 1q21.1   | 147329553 | 147333908 | 1         | Gain       | Unavailable       |            |              |
| 1   | 1q21.1   | 147349261 | 147353110 | 1         | Gain       | Unavailable       |            |              |
| 1   | 1q21.3   | 150830767 | 150852980 | 9         | Loss       | Available         | 0.025      | consistent   |
| 1   | 1q23.3   | 161331107 | 161353123 | 2         | Gain       | Available         | 1.205      | consistent   |
| 1   | 1q41     | 214791741 | 214812222 | 2         | Loss       | Available         | 0.899      | inconsistent |
| 1   | 1q42.2   | 232123846 | 232142044 | 2         | Loss       | Unavailable       |            |              |
| 2   | 2p11.2   | 89059260  | 89084703  | 9         | Gain       | Available         | 34.500     | consistent   |
| 2   | 2p11.2   | 89265876  | 89282326  | 1         | Gain       | Available         | 4.000      | consistent   |
| 2   | 2p11.2   | 100258948 | 100275519 | 2         | Loss       | Available         | 1.102      | inconsistent |
| 3   | 3p14.1   | 67205576  | 67215541  | 1         | Loss       | Available         | 0.661      | consistent   |
| 3   | 3p14.1   | 68824403  | 68830109  | 7         | Loss       | Available         | 0.000      | consistent   |
| 3   | 3q29     | 195861808 | 195862969 | 2         | Gain       | Available         | 1.045      | inconsistent |
| 4   | 4p15.1   | 34489079  | 34508226  | 1         | Gain       | Available         | 1.941      | consistent   |
| 4   | 4q13.2   | 69057536  | 69166582  | 9         | Gain       | Available         | 2.030      | consistent   |
| 4   | 4q32.3   | 169050847 | 169057999 | 2         | Gain       | Available         | 2.745      | consistent   |
| 4   | 4q34.3   | 181781397 | 181793798 | 1         | Loss       | Available         | 0.760      | consistent   |
| 5   | 5q35.3   | 180311316 | 180350266 | 3         | Loss       | Available         | 0.048      | consistent   |
| 6   | 6p21.33  | 31520940  | 31544618  | 3         | Loss       | Unavailable       |            |              |
| 6   | 6p21.32  | 32613187  | 32625672  | 5         | Loss       | Available         | 0.443      | consistent   |
| 6   | 6q14.1   | 77073713  | 77083510  | 1         | Loss       | Available         | 0.557      | consistent   |
| 6   | 6q14.1   | 77496587  | 77499919  | 1         | Gain       | Available         | 2.135      | consistent   |
| 7   | 7q33     | 133435837 | 133448649 | 9         | Gain       | Available         | 15300      | consistent   |
| 7   | 7q36.2   | 154024148 | 154031763 | 1         | Gain       | Unavailable       |            |              |
| 8   | 8p23.1   | 12264620  | 12321649  | 9         | Loss       | Available         | 0.038      | consistent   |
| 8   | 8p11.23  | 39418698  | 39453565  | 2         | Gain       | Available         | 1.409      | consistent   |
| 9   | 9p24.1   | 6653234   | 6660448   | 9         | Loss       | Available         | 0.000      | consistent   |
| 9   | 9p21.3   | 23356378  | 23363976  | 3         | Loss       | Available         | 0.472      | consistent   |
| 9   | 9p11.2   | 44671193  | 44728735  | 8         | Loss       | Available         | 0.404      | consistent   |
| 9   | 9q34.3   | 137349180 | 137356063 | 3         | Gain       | Unavailable       |            |              |
| 10  | 10q21.1  | 56127179  | 56137663  | 1         | Loss       | Available         | 0.611      | consistent   |
| 11  | 11p15.1  | 18905563  | 18918255  | 9         | Gain       | Available         | 51.150     | consistent   |
| 11  | 11q11    | 55117835  | 55209409  | 9         | Loss       | Available         | 0.348      | consistent   |
| 12  | 12p13.31 | 9529191   | 9604941   | 9         | Gain       | Available         | 2.325      | consistent   |
| 12  | 12q12    | 37649999  | 37657882  | 1         | Gain       | Available         | 0.887      | inconsistent |
| 14  | 14q32.33 | 105322376 | 105362034 | 9         | Loss       | Available         | 0.086      | consistent   |
| 14  | 14q32.33 | 105982594 | 105989708 | 1         | Loss       | Unavailable       |            |              |
| 14  | 14q32.33 | 106014913 | 106022782 | 1         | Loss       | Available         | 0.400      | consistent   |
| 15  | 15q11.2  | 19822478  | 19842931  | 7         | Gain       | Available         | 3.355      | consistent   |



|    |          |          |          |   |      |           |       |            |
|----|----------|----------|----------|---|------|-----------|-------|------------|
| 15 | 15q11.2  | 19928223 | 19936532 | 1 | Gain | Available | 3.170 | consistent |
| 15 | 15q11.2  | 19988041 | 19997998 | 1 | Gain | Available | 2.730 | consistent |
| 15 | 15q11.2  | 20054797 | 20068606 | 1 | Gain | Available | 2.730 | consistent |
| 16 | 16q12.2  | 54356202 | 54374147 | 3 | Loss | Available | 0.601 | consistent |
| 17 | 17q12    | 31463252 | 31620417 | 8 | Gain | Available | 3.330 | consistent |
| 17 | 17q21.2  | 36662283 | 36683751 | 4 | Loss | Available | 0.000 | consistent |
| 18 | 18q22.1  | 60410721 | 60442384 | 1 | Loss | Available | 0.746 | consistent |
| 18 | 18q22.1  | 62058576 | 62063122 | 9 | Loss | Available | 0.000 | consistent |
| 19 | 19q13.42 | 59431750 | 59437881 | 2 | Loss | Available | 0.338 | consistent |
| 19 | 19q13.42 | 59487164 | 59502901 | 1 | Gain | Available | 2.370 | consistent |
| 20 | 20p12.1  | 14755161 | 14860223 | 7 | Loss | Available | 0.554 | consistent |
| 20 | 20p12.1  | 14863985 | 14872305 | 1 | Loss | Available | 0.456 | consistent |
| 22 | 22q11.22 | 21000103 | 21014397 | 1 | Gain | Available | 1.436 | consistent |
| 22 | 22q11.22 | 21421371 | 21423014 | 1 | Gain | Available | 1.676 | consistent |
| 22 | 22q11.22 | 21482800 | 21581602 | 9 | Gain | Available | 8.285 | consistent |
| 22 | 22q11.23 | 22613097 | 22625721 | 9 | Loss | Available | 0.100 | consistent |
| 22 | 22q11.23 | 22680056 | 22726623 | 9 | Gain | Available | 2.600 | Consistent |

**Supplementary Table S4.** Primers for 67 CNV loci and internal control

| Chr | Cytoband | Primers                   |                            |
|-----|----------|---------------------------|----------------------------|
|     |          | Forward                   | Reverse                    |
| 1   | 1p36.21  | ATCCTTCACTTGGGTGCCCACTAT  | TAACGATCAAGTGCCTGTGGGTGA   |
| 1   | 1q21.3   | AAGTGGCCACCCAAGAGTAGTTCA  | AAAGAGGGTGGCTCTGAATGTGGA   |
| 1   | 1q23.3   | AACGTTTAGCTCCCACTTACGGGT  | ACCTAGGTGCCTGTCAATGGTGAA   |
| 1   | 1q31.3   | AAGGGCTCGGGCAAAGGTAATAAT  | GGAAGGAAAGCGCCATTTGTGTCA   |
| 1   | 1q41     | TCCTTGCAGATCTTTCCAGCCTCA  | ACATCTTCACTGTGTGGTGGGTGA   |
| 2   | 2p11.2   | AAACCAACCATCAGGCCTCGTAGA  | TGGTCAACAGGAAGCAAGAGGTCA   |
| 2   | 2p11.2   | TGCGAGTGAGTACCATCCACCAA   | T AAACCTCTGAGTGAGGAGGCGTTT |
| 2   | 2q11.2   | ACCAGCAGCGTATCAGTGTCTCAA  | TGCCTCTAGCCAGAGCAACAGATT   |
| 2   | 2q11.2   | AACTGAGTGAACAGCAGTGGGAGT  | CCTAACTTTGGCCACATGCGTTGT   |
| 3   | 3p23     | ATCGCATAACCATGCTCAGTGCCTA | AAAGGGTGTTCGTTGGTTGGTTAC   |
| 3   | 3p14.1   | TTCTAGGTGATGCTGGTGTCTACT  | TGCCATTACGCCACACCTTGATTG   |
| 3   | 3p14.1   | CTGCCATGTTGGTTCTTTGTGGCT  | AGTGGTGGCCACTGAACTTTCCCTA  |
| 3   | 3q29     | AAGGCCTCACTAAACGAAGCCAGA  | AGATGCTCGAAACCCACTCCTGTT   |
| 4   | 4p15.1   | GCATTGCTCCACCAGAGTGCATTT  | TGGGCTCCTCTTACTCAATTGCCA   |
| 4   | 4q13.1   | AAGTTCCTCCCAAGTTCCTCCCAA  | TTTGAGAGGCCGAAGTGGATGGAT   |
| 4   | 4q13.2   | ACAGTCATCTTGTGGCCTCTCCAA  | TTGCATTGCACCAGGAGGACATTG   |
| 4   | 4q32.3   | TCAGCGGTAGGGCTTTGTGGATAA  | AAAGAGCGTCTGCAGTTTCAAGCC   |
| 4   | 4q34.3   | ACCTGCACTCTCTGTTTCCTTCCAA | TGCCTTCTTACCCTCTTCTTGCCA   |
| 5   | 5q35.3   | TGAGGAAGACTCCTTGGGCTGTTT  | TTCTCAATGTGTTCCCTCCCTGCT   |
| 6   | 6p21.32  | ATGGTCCAGGGTATGAGCGATGTT  | TTTGCAGACCACCACCAAACAG     |
| 6   | 6q14.1   | GCCAGCTCTGCTTGCCATAACAAA  | AGACTTCCCAGCCTGCATAACTGT   |
| 6   | 6q14.1   | TTCACTGGTTGTCACCGTTCAGGA  | AAACTTAGCCAAACGGCAGTGACC   |
| 6   | 6q14.1   | TTTCTGAAGGGAACCTGGCGCTAT  | AGTGTGGTCATGCAAGGCTCCTAT   |
| 7   | 7p22.2   | TTGGCGTAGGCATCACTTCTGACT  | AGGCACTCTTATGTTGGGCTCACT   |
| 7   | 7q33     | TTGAGGTGGCTGACCTTAGCATGT  | AGATGATGGCCAAGCTTCTCACCT   |
| 8   | 8p23.1   | AAGGTCAGAGTCTGGAAGGCGTTT  | TAGGAGCTGGCAAAGGCAAGAGAT   |
| 8   | 8p11.23  | TGAGAGCCACTTTCCCTGGCAATA  | TTTGTATCCCACTCGTGGCTCCT    |
| 9   | 9p24.1   | GGCAATCGCGTTCCTCAAACAGTAT | TAGATGGCAGCATTGAGGTGGAT    |
| 9   | 9p21.3   | ATTCTGCCTACCGTACCACCCAAA  | AAGCGCTTGCATGACTTGAGGTTG   |
| 9   | 9p11.2   | ATGACAGACAGGACCCAACACCAT  | TCAACAATAGGGCAGAGGAAGCCA   |
| 10  | 10q11.22 | TCGCTGTTGATGGACACTTGGGT   | GTGGGAAACAGCTTGGCATTTCCT   |
| 10  | 10q21.1  | TGAAGGAACATCTGCCACACAGA   | GCATTTCCGGTCATTTACGCCTGGT  |
| 11  | 11p15.4  | TACTGCCTATTTGTCTGCCCACGA  | AGGAACCTTGTGAGCTACAGGACA   |
| 11  | 11p15.1  | AGCATCAGGAGTGAGTGCATCCAT  | TTAGTGCCTGCCTGTGGATAACA    |
| 11  | 11q11    | ACCCATGAATGTGGGAGGCTTACT  | CACACACGTGCACACACACTTCAA   |
| 11  | 11q22.1  | TCACTCCAGGGTGATTTGCTCACT  | TGGAACCTCAGTCAGTCAGGTTGCT  |
| 11  | 11q22.3  | ACGCTGACAAGGTTCCCTCTTTGT  | TCAGCTTTACGCTCAGTGTACCT    |
| 12  | 12p13.31 | ATCTTCGTGGGCAGGAGAAACAGA  | ATGCACTTCCCTGCGTGGTTTCATC  |
| 12  | 12q12    | AAGAGGCATGAGCTGTGAGGAGTT  | AAGTGGAAAGGTTTGGAGGGACTGT  |

|    |                              |                           |                           |
|----|------------------------------|---------------------------|---------------------------|
| 12 | 12q14.1                      | AGCCATCGAAAGACTCATGGCTGA  | AGTGCTGTATGTCACCCAAAGGGA  |
| 13 | 13q21.33                     | ATTCCTGACAGGCACTGATCTGCT  | AGACGACAACAGCTTGGATGGACA  |
| 13 | 13q21.33                     | ACCAATCCCACAGGGAGAAATCCA  | TTGGGTTGCACAAACAGAAGAGCC  |
| 14 | 14q32.33                     | TGCAGTGAACCGAGATCGAACCAT  | AATGCGTGCAGGTGGAGAGACATA  |
| 14 | 14q32.33                     | TTCTCCCTGGGTAAAGTGTGCAGT  | GAAGCATCAATGAACTGGGCAGCA  |
| 15 | 15q11.2                      | AGGATGAGCTGAAAGTGTGGCTCT  | AGCCATTCCCTTACGAGTGTTCCCA |
| 15 | 15q11.2                      | TAGATGCACCTGTGCACTTGGCTA  | AGTCACATTTGGACGCCTCTGTCA  |
| 15 | 15q11.2                      | AGGATGAGCTGAAAGTGTGGCTCT  | AGCCATTCCCTTACGAGTGTTCCCA |
| 15 | 15q11.2                      | TGTGTCTGTGGAAATGGAGCAGGA  | ACAACAGTTCCTGACCCTCCATCA  |
| 15 | 15q12                        | AACATTGGCAGGAGGTATGAGGGT  | TGCAGTCCCTTGGGTTGCTACTAA  |
| 16 | 16q12.2                      | AGCCGCATCTGTAGTCTGAAAGT   | GTTCCCTCCAAAGCTGGCAATGTT  |
| 17 | 17p13.1                      | TGCTGCCTTCCCATTTGATTGAGC  | TCCTTGACTTCTGTGACCCAGCAT  |
| 17 | 17p11.2                      | AGAAACTGGAATCCCACAGGCTCA  | AGGAACATGGATGGTGTACAGGA   |
| 17 | 17q12                        | CTTTGCCACCAAAGCCAGAACACT  | TGTGGACAGCAGCTCCTCATGATT  |
| 17 | 17q21.2                      | TGGTGTGGGTTGTACAGAGAGCAA  | TACCCAGCCTCCTTCTTTGGTTGT  |
| 18 | 18q22.1                      | TATGAACTCGCAGGCTTACCACCA  | TAGAGCTTGGGCCATGGTTTCAGA  |
| 18 | 18q22.1                      | GAGTTGGACGCCTTGTGCGTTATT  | TGCTTGCCTCTATGCCTAGGTGTT  |
| 19 | 19p12                        | ATGGTGAAGTGGTCTGTCTCCTT   | GGTGCATGGCACAATTACAGCTCA  |
| 19 | 19q13.42                     | TAAGTGGCTCATTGTCTGCGTGGA  | CACTGGCCACTAAATGGCAAACCA  |
| 19 | 19q13.42                     | TAAGACCTGGGATGCAGCAGGAAA  | TGAACTGATGGATGGGCTGAAGGA  |
| 20 | 20p12.1                      | ACAGCCAGCTTTAACACCATGCAC  | AGCTGAATGCAGTGCAGACAAACC  |
| 20 | 20p12.1                      | AGGCAGTTGGTGAAGGCAGTAGAA  | CACAGGCCCAAATGGAACCAAACCT |
| 22 | 22q11.22                     | AGTGGGAGGAAGAAATGGAACCCA  | TTTACAGCAAACTGCAGGACCAG   |
| 22 | 22q11.22                     | TGGCCTCTCAAACCTGCTGGGATTA | ACTGCAGGTGACAACACAGTCTCA  |
| 22 | 22q11.22                     | TCAAGTCTCTGGTGCACAGTTGGA  | AGGGCCATCATCAGCTGCTATCTT  |
| 22 | 22q11.22                     | ACATGGAGCAGCTCAGGCAGATAA  | GTGCTACTTGCACAGGGCATGAAA  |
| 22 | 22q11.23                     | TCCTTGGTGGAGCTGGATTACAT   | ACCCTCAGAGCTCATCATGCCTTT  |
| 22 | 22q11.23                     | TGCTATGTTGCC TAGCCTGGTCTT | CATGGAAATCCGTTGGTGTGGCTT  |
|    | Internal Control<br>(HS6ST3) | CGCTACCACCACACCAAGCAG     | CCACCTGGCTGTTGTAGTCCTC    |

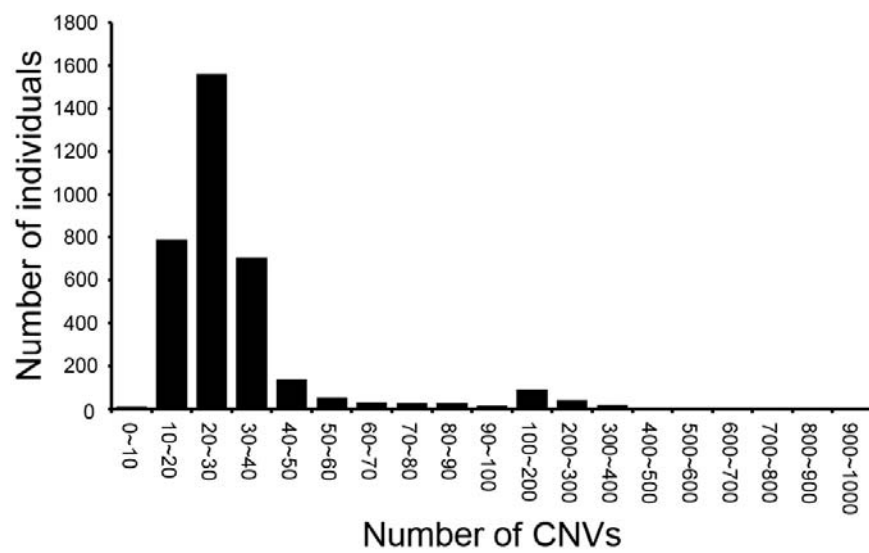

**Supplementary Figure S1.** Number of individuals by number of CNVs.

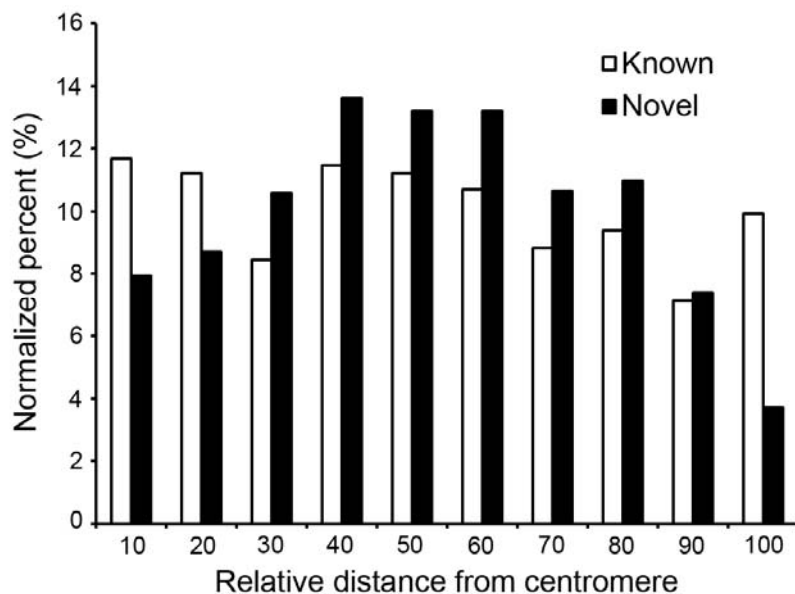

**Supplementary Figure S2.** The fraction of CNVRs with respect to the relative distance from centromere (left) to telomere (right). X axis is divided into 10 bins based on the relative distance from centromere. Normalized percent = number of CNVRs that belong to each bin (known or novel)/total number of CNVRs (known 1,926; novel 2,077).

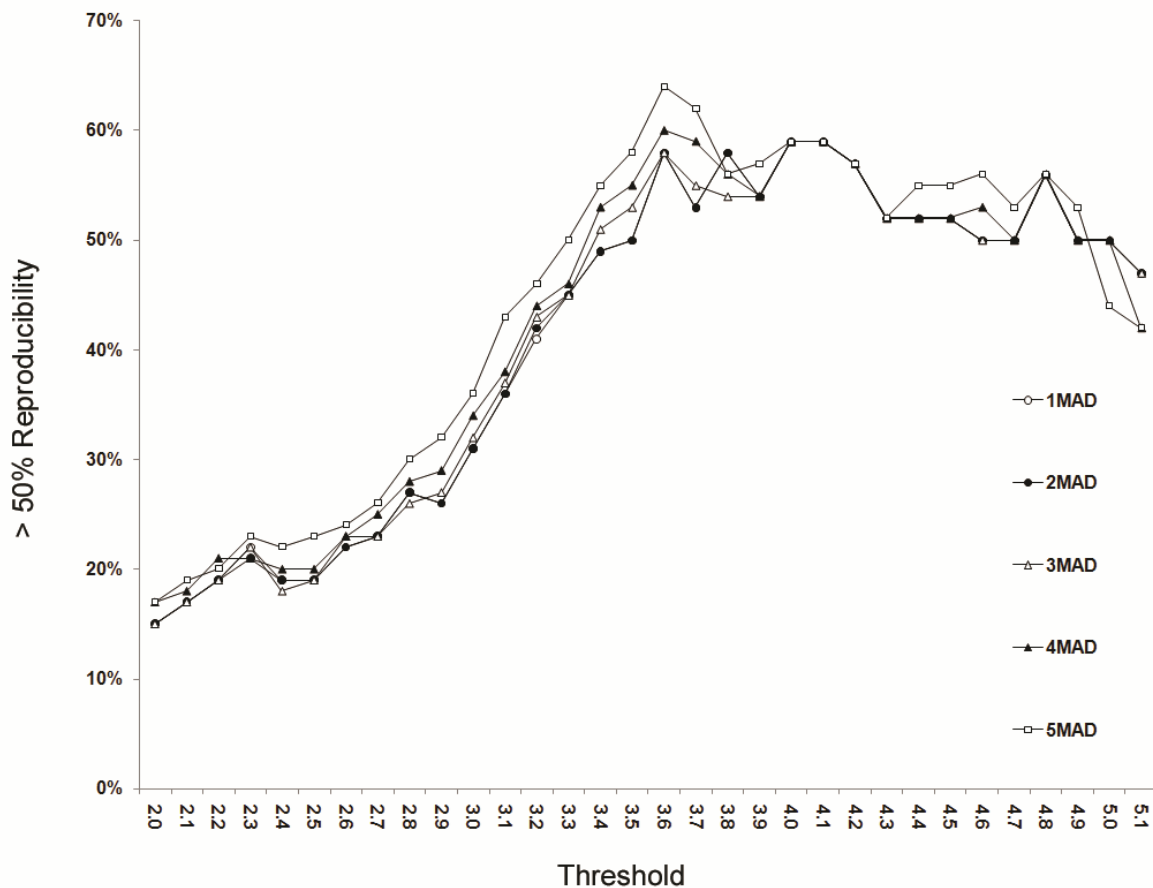

**Supplementary Figure S3.** >50% reproducibility plot. Triplicate experiments with two HapMap cell line DNAs, NA10851 and NA15510 were carried out using Affymetrix SNP array 5.0. Then, we calculated >50% reproducibility that is the percentage of CNVs called >50% of time in all pairwise comparisons following the methods of Komura et al's (Genome Res 2006, 16: 1575-1584), i.e., when a CNV was detected more than 5 times out of 9 pairwise comparisons, the according CNV was said to show >50% reproducibility. This calculation was performed for 30 different threshold levels ranging from 2 to 5 median absolute deviations (MAD) with 5 different cutoffs of island score ranging from 1 to 5 MAD.
